# Supplementary material for: Forward and reverse genomic screens enhance the understanding of phenotypic variation in a large Chinese rhesus macaque cohort
Source: Research Square preprint supplement (doi:10.21203/rs.3.rs-4800799/v1), 2024-08-21
Supplement: Supplementary file 1 [file b0e664171e0814d2d7489a88.xlsx]

## Sheet: Supplementary Table 1
Supplementary Table 1. Details of sample information, sequencing depth and variant calling results.
Sample ID	Gender	Age (year)	Mean coverage	Mappable reads	Mappable ratio reads	Number of SNPs	Number of INDELs	Ts/Tv
WHYD20120116_A	female	3.41944	29.4315	602329414	0.999358	13893407	3040250	2
WHYD20120117_A	female	3.39167	29.3999	602062499	0.999333	13872508	3029274	2.01
WHYD20120118_A	female	3.46389	29.3827	602037452	0.999332	13927401	3035110	2
WHYD20120119_A	female	3.46667	29.4222	602974377	0.999344	13910528	3042249	2.01
WHYD20120120_A	female	3.46111	29.4258	602178177	0.999334	13923258	3044917	2.01
WHYD20120121_A	female	3.35556	29.4701	602833329	0.999318	13887407	3037591	2
WHYD20120122_A	female	3.31389	29.4596	602882023	0.999357	13881302	3036543	2
WHYD20120123_A	female	3.41944	29.3955	601679430	0.999269	14025060	3060600	2
WHYD20120124_A	female	3.37222	29.3673	602614102	0.999355	13923949	3047977	2.01
WHYD20120125_A	female	3.45556	29.4247	602300411	0.999338	13949503	3040043	2
WHYD20120126_A	female	3.425	29.3622	602697253	0.999352	13925789	3045347	2.01
WHYD20120127_A	female	3.37222	29.3959	602314429	0.999231	13924452	3038571	2.01
WHYD20120128_A	female	3.40278	29.2604	601520334	0.999374	13932900	3038349	2
WHYD20120129_A	female	3.52222	29.3425	602177301	0.99918	13858777	3023949	2.01
WHYD20120130_A	female	3.39722	29.2764	601866712	0.999072	13950439	3036961	2.01
WHYD20120131_A	male	5.34722	28.9758	602537474	0.999239	15150791	3025959	1.87
WHYD20120132_A	female	3.43333	29.022	602894473	0.99918	14321327	2912574	1.83
WHYD20120133_A	female	3.47778	28.9783	601449913	0.999256	14277158	2935394	1.85
WHYD20120134_A	female	3.50278	28.998	602535431	0.999227	14439564	2914613	1.81
WHYD20120135_A	female	3.40833	28.8181	601280213	0.99923	14356683	2925519	1.84
WHYD20120136_A	female	3.5	29.3427	601688565	0.999163	13877004	3030947	2
WHYD20120137_A	female	3.375	29.2895	601850439	0.999245	13925998	3034548	2
WHYD20120138_A	female	3.33611	29.3856	601942582	0.999264	13960028	3038204	2.01
WHYD20120139_A	female	3.42778	29.3443	602586418	0.999057	13886327	3018071	2
WHYD20120140_A	female	3.43056	29.2567	601919542	0.999204	13904436	3019006	2
WHYD20120141_A	female	3.36944	29.2627	601471216	0.999088	13785083	2999373	2
WHYD20120142_A	female	3.375	29.325	602214168	0.99925	13832820	3017684	2.01
WHYD20120143_A	male	3.34167	29.313	601946283	0.999301	13782017	3000604	2.01
WHYD20120144_A	male	3.40556	29.1982	602812086	0.999267	13804743	3011938	2
WHYD20120145_A	male	3.38889	29.2518	601988704	0.999239	13846726	3026523	2.01
WHYD20120146_A	male	3.29167	29.3139	602704720	0.999253	13775012	2990690	2.01
WHYD20120147_A	male	3.40556	29.2349	602468813	0.999286	13821423	3005934	2
WHYD20120148_A	male	3.46667	29.2176	601906463	0.999279	13665448	2980523	2
WHYD20120149_A	male	3.41944	29.0951	601553790	0.999194	13772486	2996848	2.01
WHYD20120150_A	male	3.44167	29.2223	602504312	0.999265	13770507	3006156	2.01
WHYD20120151_A	male	3.39167	29.2333	601690594	0.999299	13772887	2995158	2
WHYD20120152_A	male	3.43611	29.2564	602744060	0.999271	13835542	3012195	2.01
WHYD20120153_A	male	3.30278	29.2633	603122730	0.999324	13795240	3015086	2
WHYD20120154_A	male	3.35	29.2235	601432740	0.999331	13802955	2981009	2
WHYD20120155_A	male	3.325	29.1673	602505920	0.999296	13810435	3012789	2
WHYD20120156_A	male	3.4	29.2032	602163972	0.999212	13775357	3010212	2.01
WHYD20120157_A	female	15.5972	29.2229	602713160	0.999227	13816304	3017650	2.01
WHYD20120158_A	female	16.4167	29.1986	603006785	0.999313	13919632	3038269	2
WHYD20120159_A	male	10.475	29.2041	601656683	0.99932	13904621	3022377	2
WHYD20120160_A	female	18.2056	29.2761	601833117	0.999336	13915816	3043703	2
WHYD20120161_A	male	5.42778	29.2688	601788596	0.999312	19086785	3900508	2.02
WHYD20120162_A	male	15.75	29.4035	602945706	0.999221	17193998	3462727	2.03
WHYD20120163_A	female	15.5389	29.3873	602239243	0.999259	14023789	3053346	2
WHYD20120164_A	female	15.4778	29.3362	602780370	0.999335	13961467	3045844	2
WHYD20120165_A	male	9.16944	29.3264	602744551	0.999236	13770239	3001516	2
WHYD20120166_A	female	9.19444	29.1519	603686906	0.997921	14047238	2970038	1.93
WHYD20120167_A	female	17.3889	29.2273	601734801	0.998884	14148309	2945054	1.89
WHYD20120168_A	female	15.6889	29.1131	601001272	0.998746	14104597	2932376	1.87
WHYD20120169_A	female	5.38056	29.0786	600490871	0.997229	14136348	2935892	1.87
WHYD20120170_A	female	5.38611	29.1149	600500157	0.997274	14171931	2933420	1.89
WHYD20120171_A	female	5.33889	29.1965	602576573	0.99875	14017985	2979068	1.94
WHYD20120172_A	female	5.225	29.1876	603400612	0.998679	13992061	2976620	1.93
WHYD20120173_A	female	5.25278	29.2875	602567865	0.999366	13871174	3031497	2.01
WHYD20120174_A	female	5.39167	29.2536	602597432	0.999348	13906061	3041282	2
WHYD20120175_A	female	5.24722	29.2786	601584724	0.999269	13963375	3042133	2
WHYD20120176_A	female	5.34167	29.2437	602118196	0.999312	13890333	3024736	2
WHYD20120177_A	female	5.30556	29.2434	601665354	0.999397	13873773	3038128	2
WHYD20120178_A	female	5.01389	29.4204	601767635	0.999389	13968804	3032044	2
WHYD20120179_A	female	5.36667	29.2347	602714664	0.999294	13746991	3003362	2
WHYD20120181_A	female	5.36111	29.2347	601833167	0.999378	13922091	3036890	2
WHYD20120182_A	female	5.31389	29.3058	602906596	0.999279	13851433	3019718	2.01
WHYD20120183_A	female	5.26111	29.3604	602995738	0.99932	13934869	3038558	2.01
WHYD20120184_A	female	5.35278	29.2224	601741306	0.999346	13876128	3029236	2
WHYD20120185_A	female	5.325	29.3307	602667498	0.999363	13175247	2894894	2
WHYD20120187_A	female	5.01389	29.3376	602466181	0.999372	13949563	3036783	2.01
WHYD20120188_A	female	5.30833	29.4363	602565123	0.999369	13914011	3028339	2
WHYD20120189_A	female	5.22222	29.3609	602610431	0.99929	13887235	3026158	2
WHYD20120190_A	female	5.32778	29.2939	602106672	0.999388	13927979	3042309	2
WHYD20120191_A	female	5.475	29.3282	602986225	0.999287	13905948	3028667	2
WHYD20120192_A	female	5.32222	29.3508	602645381	0.999347	13884885	3029939	2
WHYD20120193_A	female	5.47222	29.3503	602142741	0.999377	13870611	3028845	2
WHYD20120194_A	female	5.48056	29.382	602450919	0.999382	13964479	3041902	2
WHYD20120195_A	female	5.43056	29.3982	602142284	0.999402	13946749	3047973	2
WHYD20120196_A	female	5.40278	29.4535	602149353	0.999393	13901463	3012446	2
WHYD20120197_A	female	5.45	29.3973	602696659	0.99937	13822650	3011123	2.01
WHYD20120198_A	female	5.33611	29.409	602566156	0.999345	13946327	3034092	2
WHYD20120199_A	female	5.41389	29.427	602656121	0.999337	13945366	3040259	2
WHYD20120200_A	female	5.31389	29.2855	601940837	0.999391	13906830	3046314	2
WHYD20120201_A	female	5.40278	29.1718	601603595	0.999345	13984495	3006398	1.99
WHYD20120202_A	female	5.40556	29.3234	602115447	0.998905	13907494	3005330	1.99
WHYD20120203_A	female	5.46944	29.3447	602702259	0.999445	13953029	3018190	1.99
WHYD20120204_A	female	5.43056	29.4191	601955433	0.999356	13873404	2961214	1.99
WHYD20120205_A	female	5.51111	29.3457	602391144	0.999358	13981310	3007099	1.99
WHYD20120206_A	female	5.44444	29.3351	601915822	0.999368	13858472	3011891	1.99
WHYD20120207_A	female	5.325	29.2189	601987964	0.999327	13907647	3015692	1.99
WHYD20120208_A	female	5.49722	29.252	601972326	0.999371	13970683	3032998	1.99
WHYD20120209_A	female	6.21667	29.2259	601281066	0.999386	13855643	2984857	1.99
WHYD20120210_A	female	5.24167	29.3439	602854527	0.999355	13915074	2994591	1.99
WHYD20120211_A	female	16.75	29.3425	602741465	0.999205	17368058	3449967	2.02
WHYD20120212_A	male	5.45	29.3481	602209837	0.999371	13907089	2967898	1.99
WHYD20120213_A	male	5.26111	29.4205	602317032	0.999353	13867471	2960147	1.99
WHYD20120214_A	female	6.08056	29.4104	601648765	0.999328	13972413	2980927	1.99
WHYD20120215_A	female	7.15833	29.4471	601650176	0.999329	15476459	3212613	2
WHYD20120216_A	female	7.32222	29.3456	601310341	0.999369	13928796	2971672	1.99
WHYD20120220_A	female	8.40833	29.421	602186134	0.999382	13927214	2935698	1.99
WHYD20120221_A	female	8.34167	29.3478	602370031	0.999345	13938476	2956851	1.98
WHYD20120222_A	female	10.475	29.4183	601536965	0.999387	13892522	2923666	1.99
WHYD20120223_A	female	11.5083	29.3869	601298282	0.999364	13947791	2929145	1.99
WHYD20120224_A	female	8.45833	29.4576	601782099	0.999344	13885980	2942579	1.99
WHYD20120225_A	female	8.40556	29.3231	602816094	0.999351	13796178	2976372	1.99
WHYD20120226_A	female	9.51111	29.245	602358795	0.999375	13996135	3005229	1.99
WHYD20120227_A	female	9.41111	29.2982	602040569	0.999359	13865790	2945842	1.98
WHYD20120228_A	female	9	29.4531	602156583	0.999396	13926785	2930621	1.99
WHYD20120229_A	female	9.53889	29.4321	601671097	0.999368	13924237	2926822	1.99
WHYD20120230_A	female	9.45556	28.2961	601779373	0.999354	13833798	2957170	1.98
WHYD20120231_A	female	9.5	28.5081	602369433	0.999302	13976805	2990936	1.98
WHYD20120232_A	female	9.3	28.4766	602678394	0.999349	13907805	2980741	1.98
WHYD20120233_A	female	9.51667	28.5241	602441994	0.999334	14005969	2987622	1.98
WHYD20120234_A	female	9.54167	28.2869	601981641	0.999304	13875605	2964588	1.98
WHYD20120236_A	female	8.40833	28.5295	603127224	0.999339	13956244	2984748	1.98
WHYD20120237_A	male	8	28.4958	602087258	0.999326	13996689	2982656	1.98
WHYD20120238_A	female	8.41667	28.4785	603063313	0.999402	14066115	3004330	1.99
WHYD20120239_A	female	8.43611	28.4255	602576846	0.999348	14024171	2999627	1.98
WHYD20120240_A	female	8.25278	28.5211	601991176	0.999305	14046217	2998194	1.98
WHYD20120243_A	female	9.25278	28.3522	601887506	0.999373	13970342	2973353	1.98
WHYD20120244_A	female	8.16389	28.0799	602789603	0.99839	41577801	5919803	2.01
WHYD20120245_A	female	9.39167	28.4553	601984134	0.999341	13912262	2977900	1.98
WHYD20120247_A	female	8.38889	28.2343	602069044	0.999398	13853840	2959223	1.98
WHYD20120248_A	female	8.43889	28.2513	602187246	0.999403	13943945	2966613	1.98
WHYD20120249_A	female	8.32778	28.3579	601866711	0.999242	13983668	2988087	1.98
WHYD20120250_A	female	8.61667	28.5463	601673489	0.999338	14006022	2995903	1.98
WHYD20120251_A	female	7.50278	28.6114	602968580	0.999324	13925737	2982919	1.98
WHYD20120252_A	female	6.36111	28.5647	601511473	0.99931	14000505	2987302	1.98
WHYD20120253_A	female	6.28056	28.7024	601884668	0.999353	13972141	3005593	1.98
WHYD20120254_A	female	6.26944	28.7716	602598552	0.999263	14038165	2997899	1.98
WHYD20120255_A	female	6.24722	28.1899	601541269	0.999372	13998806	2987392	1.98
WHYD20120256_A	female	6.34167	28.4987	601540126	0.999372	13989567	3003990	1.98
WHYD20120257_A	female	6.43889	28.7899	602810228	0.999384	13923442	2968100	1.98
WHYD20120258_A	female	6.29444	28.6109	602224688	0.999347	13971478	2993763	1.98
WHYD20120259_A	female	6.23611	28.7813	601799588	0.999395	13823305	2964544	1.98
WHYD20120260_A	female	8.41667	28.7723	602011594	0.999369	13956885	2995399	1.98
WHYD20120261_A	female	8.35556	28.6115	602506681	0.999385	14007422	2996432	1.98
WHYD20120262_A	female	8.11667	28.5738	602109527	0.999344	13935914	2977076	1.98
WHYD20120263_A	female	9.3	28.75	602672562	0.999395	14020105	3003126	1.98
WHYD20120264_A	female	8.325	28.6202	602661874	0.999308	14034900	3001305	1.98
WHYD20120265_A	female	8.42778	28.8678	602138674	0.999359	13931245	2973007	1.98
WHYD20120266_A	female	9.34444	28.463	601566146	0.998909	17359218	3345082	1.98
WHYD20120267_A	female	15.3278	28.7528	602913356	0.99936	13964844	2991956	1.98
WHYD20120269_A	male	3.46667	28.6495	602089681	0.999359	13834271	2961347	1.98
WHYD20120270_A	male	3.48056	28.4965	602588367	0.9994	13881582	2970186	1.98
WHYD20120271_A	male	3.5	28.5784	602615919	0.999379	13913033	2970728	1.98
WHYD20120272_A	male	3.43889	29.2088	601641404	0.999311	13950413	3005639	2
WHYD20120273_A	male	3.43333	29.4432	602108336	0.999316	13801735	2989096	2.01
WHYD20120274_A	male	3.45833	29.0353	602958543	0.999425	13665707	2988506	2
WHYD20120275_A	male	3.40833	29.236	601911991	0.999361	13861083	3017896	2
WHYD20120276_A	male	3.45556	29.3518	603052628	0.999387	13835124	3021772	2
WHYD20120277_A	male	3.49444	29.2983	601645878	0.999332	13811015	3007684	2
WHYD20120278_A	male	3.46944	29.2781	601679400	0.999393	13767032	2999388	2
WHYD20120279_A	male	3.50556	29.3188	602684112	0.999392	13832853	3007380	2
WHYD20120280_A	male	3.43889	29.2967	602701870	0.999418	13837005	3010078	2
WHYD20120281_A	male	3.50556	29.3879	601889478	0.999459	13865920	3013038	2
WHYD20120282_A	male	3.44167	29.3863	602577744	0.999319	13828126	3004780	2
WHYD20120283_A	male	3.45556	29.2541	601506230	0.999384	13848342	3015058	2
WHYD20120284_A	male	3.48333	29.3697	602934456	0.999369	13825681	3012048	2
WHYD20120285_A	male	3.38333	29.3371	601634198	0.999365	13791290	3004049	2
WHYD20120286_A	male	3.49444	29.3703	601741472	0.99939	13830923	3014563	2
WHYD20120287_A	male	3.33611	29.2109	602676875	0.999376	13803834	3015644	2
WHYD20120288_A	male	3.36944	29.3273	602677188	0.999387	13805563	3006571	2
WHYD20120289_A	male	3.37222	29.5548	603123973	0.999414	13865977	3022587	2
WHYD20120290_A	male	3.46944	29.4605	601975285	0.999374	13797915	3008130	2
WHYD20120291_A	male	3.44167	29.2842	603073087	0.999353	13840235	3014684	2
WHYD20120292_A	male	3.50556	29.2376	602288854	0.999391	13870806	3028676	2
WHYD20120293_A	male	3.47222	29.406	601603322	0.999351	13752338	2996742	2
WHYD20120294_A	male	3.45833	29.3317	602059984	0.99937	13787600	3011502	2
WHYD20120295_A	male	3.47222	29.3669	603286780	0.999404	13739159	2995361	2
WHYD20120296_A	male	3.46667	29.4161	603005793	0.999344	13719590	2992859	2
WHYD20120297_A	male	3.41944	29.3607	602604327	0.999373	13828496	3000860	2
WHYD20120298_A	male	3.43333	29.3495	601966291	0.999323	13769080	2992220	2.01
WHYD20120299_A	male	3.33611	29.2435	602300298	0.999364	13775550	3001518	2
WHYD20120300_A	male	3.45	29.4433	602875413	0.999342	13861090	2984843	1.98
WHYD20120301_A	male	3.33056	29.3733	602407781	0.999277	13888436	2981723	1.98
WHYD20120302_A	male	3.44722	29.1818	602690097	0.999355	13888580	2982461	1.97
WHYD20120303_A	male	3.35556	29.3637	602313012	0.999361	13892765	2962392	1.98
WHYD20120304_A	male	3.44722	29.2499	601922214	0.999339	13864233	2978487	1.98
WHYD20120305_A	male	3.43889	29.3813	601998044	0.999398	13896526	2974942	1.98
WHYD20120306_A	male	3.4	29.3275	601388586	0.999369	13924413	2981175	1.97
WHYD20120307_A	male	3.34444	29.3627	601706099	0.9994	13929797	2993100	1.98
WHYD20120308_A	male	3.33333	29.2871	601627178	0.99937	13855450	2985210	1.98
WHYD20120309_A	male	3.38333	29.3897	602330831	0.999382	13866929	2980682	1.98
WHYD20120310_A	male	3.41389	29.3436	601750514	0.999294	13946898	2997841	1.98
WHYD20120311_A	male	3.49167	29.3007	601500094	0.999368	13877698	2976717	1.98
WHYD20120312_A	male	3.45833	29.3777	601727769	0.999346	13876659	2983645	1.98
WHYD20120313_A	male	3.32778	29.3733	602930141	0.999365	13900856	2976813	1.98
WHYD20120314_A	male	3.41111	29.2299	602837316	0.99936	13830798	3032285	2
WHYD20120315_A	male	3.41111	29.3316	602156199	0.999339	13828579	3024643	2.01
WHYD20120316_A	male	3.43056	29.378	602278392	0.999374	13860826	3039120	2
WHYD20120317_A	male	3.46944	29.387	601975328	0.999337	13806090	3029431	2
WHYD20120318_A	male	3.44722	29.4206	602194377	0.999344	13863702	3039080	2.01
WHYD20120319_A	male	3.46111	29.3307	601589522	0.999378	13855197	3034931	2
WHYD20120320_A	male	3.38333	29.4629	601871095	0.998715	13783590	3027325	2.01
WHYD20120321_A	male	3.34722	29.4529	601541726	0.999399	13808680	3031522	2.01
WHYD20120322_A	female	9.23333	29.3879	602892330	0.999382	13922384	3052400	2
WHYD20120323_A	female	9.27778	29.2862	601759595	0.999381	13965981	3058569	2
WHYD20120324_A	female	9.26111	29.3438	602173097	0.999373	13908465	3051597	2.01
WHYD20120325_A	female	9.075	29.3346	601813445	0.999384	13937339	3060135	2
WHYD20120326_A	female	9.33611	29.3901	602182260	0.999344	13967886	3056495	2.01
WHYD20120327_A	female	9.33611	29.1563	602531735	0.999257	14000178	3025194	1.99
WHYD20120328_A	female	9.33056	29.0116	602507946	0.999347	13911397	3007863	2
WHYD20120329_A	female	9.14167	29.0548	601521000	0.999156	13884934	3002155	1.99
WHYD20120330_A	female	9.36944	29.0123	602857428	0.99938	13927896	3011751	1.99
WHYD20120331_A	female	9.33611	29.1694	603185671	0.998931	13983069	3008393	1.99
WHYD20120332_A	female	9.25556	29.0398	601949446	0.99934	13997294	3024133	1.99
WHYD20120333_A	female	9.10833	29.2514	601776885	0.998861	13960271	2997408	1.99
WHYD20120334_A	female	9.40833	28.8449	601814626	0.999322	14035610	3037200	2
WHYD20120335_A	female	9.4	29.0678	602558600	0.999038	13966748	3037841	1.99
WHYD20120336_A	female	9.31667	28.9432	601602490	0.999293	14007875	3020732	1.99
WHYD20120337_A	female	9.33056	29.1369	602375459	0.999379	13922908	2993309	1.99
WHYD20120338_A	female	9.325	28.9452	601590499	0.999298	14014641	3032565	1.99
WHYD20120339_A	female	9.27778	29.0211	603061691	0.999355	14034606	3037234	1.99
WHYD20120340_A	female	9.22778	29.3276	602456479	0.999362	13924992	3044951	2.01
WHYD20120341_A	female	9.31944	29.3096	602670434	0.999386	13764020	3019509	2
WHYD20120342_A	female	9.28889	29.3943	603874151	0.999352	13980118	3052903	2.01
WHYD20120343_A	female	9.27778	29.2897	602567455	0.999328	13999825	3056932	2.01
WHYD20120344_A	female	9.26944	29.2601	603141552	0.999332	13990053	3062617	2
WHYD20120345_A	female	9.27778	29.3191	602751535	0.999357	13993704	3057034	2
WHYD20120346_A	female	9.41667	30.7302	631569873	0.999391	13956249	3056956	2
WHYD20120347_A	female	7.05	29.3857	604019960	0.999367	13915688	3042591	2.01
WHYD20120348_A	female	7.15278	29.2898	602222050	0.999291	13946453	3042441	2
WHYD20120349_A	female	7.26667	29.3903	603098081	0.999346	14022161	3070448	2
WHYD20120350_A	female	6.93056	29.4692	603404526	0.999392	13869061	3033433	2
WHYD20120351_A	female	7.24167	29.3816	603204159	0.999331	13844693	3016188	2
WHYD20120352_A	female	7.08611	29.3939	603374557	0.999458	14053186	3064525	2
WHYD20120353_A	female	7.2	29.3989	601447687	0.999359	13968874	3031561	2
WHYD20120354_A	female	7.38333	29.3681	602454691	0.999334	13909243	3040045	2
WHYD20120355_A	female	7.18889	29.3503	602057282	0.999361	13996644	3051668	2
WHYD20120356_A	female	7.19722	29.2953	602372704	0.99933	13930471	3041794	2.01
WHYD20120357_A	female	7.16111	29.2893	601988435	0.999364	13949453	3045441	2
WHYD20120358_A	female	7.14444	29.3487	602810754	0.999368	13969151	3044022	2
WHYD20120359_A	female	7.18889	29.4236	602793728	0.999396	13950399	3052368	2
WHYD20120360_A	female	7.24167	29.436	602938218	0.999295	13893335	3027072	2
WHYD20120361_A	female	13.75	29.5006	603002211	0.99921	17829843	3550917	2.03
WHYD20120362_A	female	6.05278	29.3332	601723912	0.999339	13944209	3041363	2
WHYD20120363_A	female	6.36389	29.3384	602248452	0.999362	13962824	3049392	2
WHYD20120364_A	female	6.36667	29.2552	601390845	0.999326	13946183	3036756	2
WHYD20120365_A	female	6.49167	29.3079	602189589	0.999384	14006705	3051727	2
WHYD20120366_A	female	6.33611	29.3192	601673348	0.999372	14008977	3045069	2
WHYD20120367_A	female	6.30556	29.3536	602140873	0.999379	13903592	3033714	2
WHYD20120368_A	female	5.98056	29.4009	602436653	0.999335	13933059	3038408	2
WHYD20120369_A	female	6.35833	29.2672	601942204	0.999357	13970186	3047569	2
WHYD20120370_A	female	6.41667	29.3403	602375937	0.999374	14032845	3054735	2
WHYD20120371_A	female	6.34722	29.3246	602258945	0.999378	14000387	3049354	2
WHYD20120372_A	female	6.18056	29.5288	602299531	0.999319	13875596	3036546	2
WHYD20120373_A	female	6.31667	29.4089	602339626	0.999347	13940093	3039837	2
WHYD20120374_A	female	6.275	29.3572	601552416	0.99936	13991089	3042228	2
WHYD20120375_A	female	6.32222	29.3453	601783930	0.999349	14006028	3042917	2
WHYD20120376_A	female	6.55556	29.4954	602618250	0.999397	13794594	3012459	2
WHYD20120377_A	female	6.33056	29.4548	603076240	0.999397	13981323	3036653	2
WHYD20120378_A	female	6.34444	29.493	603036460	0.99932	13954637	3044526	2
WHYD20120379_A	female	6.31389	29.4799	602489025	0.999365	13997178	3029106	1.98
WHYD20120380_A	female	6.225	29.3724	602446292	0.999364	14007402	3026771	1.98
WHYD20120381_A	female	6.14444	29.5299	602703692	0.999381	13926021	3027066	1.98
WHYD20120382_A	female	6.27778	29.4358	603272531	0.999385	14052134	3037840	1.98
WHYD20120383_A	female	6.30556	29.6285	602985777	0.999396	14025856	3032116	1.99
WHYD20120384_A	female	6.33333	29.3808	601817177	0.99943	14041010	3028812	1.97
WHYD20120385_A	female	3.48056	29.4014	601900081	0.999389	14058369	3040046	1.98
WHYD20120386_A	female	3.48333	29.3277	601574217	0.999368	13975478	3028558	1.98
WHYD20120387_A	female	3.30556	29.3958	602419733	0.999363	13946666	3024357	1.98
WHYD20120388_A	female	3.40278	29.3887	602075043	0.999314	14018263	3025472	1.98
WHYD20120389_A	female	3.44722	29.4036	602362748	0.999361	14019946	3037390	1.98
WHYD20120390_A	female	3.51111	29.3595	602078213	0.999384	13970892	3023821	1.98
WHYD20120391_A	female	3.41111	29.4422	601988779	0.999406	13907216	3015192	1.98
WHYD20120392_A	female	3.42222	29.4622	602328453	0.999441	13997871	3024846	1.99
WHYD20120393_A	female	3.38333	28.6923	602931383	0.999369	13863912	3011861	2
WHYD20120394_A	female	3.38611	28.534	601895061	0.999326	13792157	2999376	2.01
WHYD20120395_A	female	3.45	28.6	601517754	0.999339	13770108	3000716	2.01
WHYD20120396_A	female	3.38611	29.2455	602070457	0.999264	13965664	3000138	1.99
WHYD20120397_A	female	3.33889	28.8164	602703870	0.999364	13874931	3044986	2
WHYD20120398_A	female	3.41111	28.5636	602526557	0.999353	13834580	3034718	2
WHYD20120399_A	female	3.28611	28.5264	603410627	0.999361	14021333	3050827	2
WHYD20120400_A	female	3.4	29.0332	603090328	0.99931	14037077	2985096	1.98
WHYD20120401_A	female	3.44167	29.067	603091968	0.99924	14042010	2979701	1.98
WHYD20120402_A	female	3.40556	29.1597	602948604	0.999268	13961151	2992499	1.98
WHYD20120403_A	female	3.55278	29.2029	602897319	0.999283	13975283	2980607	1.97
WHYD20120404_A	female	3.43056	29.3608	601495685	0.999074	13951648	2996089	1.99
WHYD20120405_A	female	3.38889	29.2119	601538136	0.999079	14077530	3011625	1.98
WHYD20120406_A	female	3.50278	28.6601	603258556	0.999266	14026219	2976045	1.99
WHYD20120407_A	female	3.3	28.9583	602671333	0.999244	13957121	3003033	1.99
WHYD20120408_A	female	3.49167	28.9078	603127724	0.999237	14022712	3006889	1.99
WHYD20120409_A	female	3.46111	28.778	602430429	0.999233	13998057	2998953	1.99
WHYD20120410_A	female	3.45	28.9188	602276720	0.999056	13990260	3002963	1.99
WHYD20120411_A	female	3.35	28.8306	602871063	0.999165	13996148	3001977	1.99
WHYD20120412_A	female	6.40556	28.8777	601167429	0.998837	13909857	3008265	1.99
WHYD20120413_A	female	6.44444	28.947	601343472	0.998949	13962270	3001614	1.99
WHYD20120414_A	female	6.39444	28.8215	602196244	0.999231	14015815	3002586	1.98
WHYD20120415_A	female	6.40833	28.2336	602958867	0.999416	13898392	2998751	2
WHYD20120416_A	female	6.25833	28.2231	602495916	0.999371	13932172	3017246	2.01
WHYD20120417_A	female	6.41389	28.2558	603035650	0.999391	13991143	3011188	2
WHYD20120418_A	female	6.46667	28.424	601536560	0.999348	13915539	3006809	2.01
WHYD20120419_A	female	6.50278	28.5464	601938151	0.999345	13860110	3021717	2.01
WHYD20120420_A	female	6.33611	28.7466	602273624	0.999339	13930379	3024922	2
WHYD20120421_A	female	6.36667	28.3163	603077317	0.999304	13952086	3023798	2.01
WHYD20120422_A	female	6.37778	28.2793	601586251	0.999393	13805507	2987841	2
WHYD20120423_A	female	6.34167	28.3052	602317448	0.999403	13957900	3019652	2
WHYD20120424_A	female	6.43333	28.461	602621416	0.999353	13845374	2999763	2
WHYD20120425_A	female	6.475	28.3343	602369957	0.999361	13914674	2994168	2.01
WHYD20120426_A	female	6.43611	28.5219	601855711	0.999361	13907523	3017944	2.01
WHYD20120427_A	female	6.41944	29.9329	630714017	0.999362	13965514	3035402	2
WHYD20120428_A	female	6.16111	28.3629	602879604	0.999279	13997001	3051492	2
WHYD20120429_A	female	6.39444	28.1269	601903197	0.999392	13957146	3002946	2
WHYD20120430_A	female	6.48056	28.2417	602514772	0.999392	13857018	3011944	2.01
WHYD20120431_A	female	6.5	28.354	602689505	0.999383	13935349	3010489	2.01
WHYD20120432_A	female	17.45	28.7779	602672635	0.999204	13966346	3035784	2
WHYD20120433_A	female	9.41111	29.0407	602695339	0.999255	13942864	3038571	2
WHYD20120434_A	female	9.36667	28.8762	603179906	0.999166	13949350	3029625	2.01
WHYD20120435_A	female	9.44167	28.9233	602037459	0.99919	13912941	3028534	2.01
WHYD20120436_A	female	9.39722	28.9269	602976960	0.999172	14037851	3048799	2
WHYD20120437_A	female	9.45833	29.0246	602360485	0.999088	13997925	3039132	2
WHYD20120438_A	female	9.36667	28.3092	602939630	0.999198	14090028	3041188	2
WHYD20120439_A	female	9.33889	28.6166	602389203	0.999253	13970820	3036737	2
WHYD20120440_A	female	9.41389	29.0481	602484278	0.999272	13853595	3015606	2
WHYD20120441_A	female	9.31667	29.025	602604640	0.99908	13956811	3045031	2.01
WHYD20120442_A	female	9.41111	28.8315	602642761	0.999193	13986420	3028885	2
WHYD20120443_A	female	9.39722	28.7304	602383500	0.999239	13983245	3021648	2
WHYD20120444_A	female	9.27778	28.8303	602872125	0.999204	13959236	3013279	2
WHYD20120445_A	female	9.41667	28.6371	603015308	0.999212	13957069	3023825	2
WHYD20120446_A	female	9.45833	28.7304	603123729	0.99925	14046371	3028695	1.99
WHYD20120447_A	female	9.46389	28.7716	602975630	0.999205	13954219	3008615	2
WHYD20120448_A	female	9.31944	28.9128	602710695	0.99918	14004098	3027771	1.99
WHYD20120449_A	female	9.29444	28.6593	603127825	0.999245	14121713	3017348	1.99
WHYD20120450_A	female	9.38611	28.5951	603498519	0.999275	13960342	2999633	1.99
WHYD20120451_A	male	3.29167	28.7002	603123922	0.999246	13837058	2975206	2
WHYD20120452_A	male	3.31389	28.8653	602772948	0.999166	13876049	3005840	2
WHYD20120453_A	male	3.37222	28.8197	602587972	0.999233	13790407	2977299	2
WHYD20120454_A	male	3.30556	28.756	602339950	0.999309	13808961	2988747	2
WHYD20120455_A	male	3.30833	28.73	602474265	0.999209	13756032	2963587	2
WHYD20120456_A	male	3.35278	28.9068	602318032	0.999092	13839740	2970617	1.99
WHYD20120457_A	male	3.20556	28.8556	601560284	0.999124	13853456	2954888	1.99
WHYD20120458_A	male	3.36944	28.9593	602845603	0.99884	13946437	2997413	1.98
WHYD20120459_A	male	3.20556	28.9534	601471936	0.999104	13861673	2986621	1.99
WHYD20120460_A	male	3.125	28.8165	603146257	0.99899	13900602	2976712	1.98
WHYD20120461_A	male	3.325	28.7998	601986032	0.99897	13840753	2979166	1.99
WHYD20120462_A	female	3.20278	28.9148	601971805	0.999052	13931619	3005189	1.99
WHYD20120463_A	female	3.27222	28.959	602625295	0.99909	13906875	2974537	1.99
WHYD20120464_A	female	3.47778	29.1085	602907454	0.999143	13917691	2982920	1.99
WHYD20120465_A	female	3.05	28.8811	602889752	0.999169	13822315	2976111	2
WHYD20120466_A	female	3.34444	28.8296	602306932	0.999252	13992140	3008150	2
WHYD20120467_A	female	3.30556	28.8414	602135983	0.999203	13932898	2998408	2
WHYD20120468_A	female	3.30278	28.6348	601806813	0.999256	13896330	3000491	2
WHYD20120469_A	female	3.39167	28.8397	602384452	0.999255	13883756	3005427	2
WHYD20120470_A	female	3.28611	28.5784	602378590	0.999226	13952700	3008233	2
WHYD20120471_A	female	3.10278	28.6261	601579160	0.999211	13895484	2995843	2.01
WHYD20120472_A	female	3.21111	22.7465	480562238	0.999402	13855518	2942866	2
WHYD20120473_A	male	3.21944	28.5722	601313520	0.998963	13630565	2927484	2
WHYD20120474_A	male	3.425	28.5928	603191330	0.999359	13823707	2962514	2
WHYD20120475_A	male	3.26667	28.6897	601443500	0.999293	13740421	2952050	2
WHYD20120476_A	male	3.34722	28.9881	602438877	0.999345	13770612	2965563	2
WHYD20120477_A	male	3.37222	28.7789	602330895	0.999378	13890593	2975010	2
WHYD20120478_A	male	3.41667	28.3901	601891965	0.999341	13751698	2958470	2
WHYD20120479_A	male	3.24167	28.2366	603144482	0.999416	13996321	3009362	1.98
WHYD20120480_A	male	3.26944	28.5536	602140325	0.99939	13775368	2933588	2
WHYD20120481_A	male	3.33333	28.4984	602564845	0.999373	13862980	2973552	2
WHYD20120482_A	male	3.26667	28.787	602927630	0.999369	13765849	2957628	2
WHYD20120483_A	male	3.24167	28.8044	602292049	0.99938	13822553	2966331	2
WHYD20120484_A	female	3.08889	28.6131	602448560	0.999387	13895756	2995571	2
WHYD20120485_A	female	3.35278	28.6907	602704848	0.999291	14029989	3022894	2
WHYD20120486_A	female	3.15	28.8622	602637163	0.999264	13963738	3028771	2
WHYD20120487_A	female	3.35	28.8045	602823884	0.999233	13925895	3008620	2
WHYD20120488_A	female	3.4	28.8927	599211392	0.994908	13955889	2982262	1.97
WHYD20120489_A	female	3.35278	29.0019	601813797	0.9992	13868870	2967812	1.97
WHYD20120490_A	female	3.43056	29.082	601699218	0.999209	13955050	2991767	1.97
WHYD20120491_A	female	3.31667	28.9467	602232706	0.998483	13980524	3000346	1.97
WHYD20120492_A	female	3.23056	28.9346	601018004	0.998455	13953563	2980408	1.97
WHYD20120493_A	female	3.33889	29.0899	602274046	0.99925	13919831	2981154	1.97
WHYD20120494_A	female	3.125	29.0061	602840769	0.999196	14047500	2998289	1.97
WHYD20120495_A	male	3.38333	29.0503	602305140	0.999123	13893298	2954887	1.97
WHYD20120496_A	male	3.33611	28.4487	602518615	0.999372	13862693	2969424	1.99
WHYD20120497_A	male	3.22778	28.7805	600970798	0.987459	13748616	2969425	2
WHYD20120498_A	male	3.24722	28.465	601373637	0.999379	13783122	2964219	2
WHYD20120499_A	male	3.23889	28.7073	602754305	0.999349	13726273	2958671	2
WHYD20120500_A	male	3.26667	28.6485	602534998	0.999354	13763800	2959383	2
WHYD20120501_A	male	3.36667	28.6986	601717760	0.999373	13778743	2968798	2
WHYD20120502_A	male	3.25	28.6391	602129384	0.999373	13795416	2957065	2
WHYD20120503_A	male	3.08611	28.719	602482403	0.999396	13778574	2954691	2
WHYD20120504_A	male	3.27778	28.7588	602260876	0.999145	13867648	2916447	1.95
WHYD20120505_A	male	3.19444	28.8656	602430747	0.999152	13910278	2949102	1.95
WHYD20120506_A	female	3	28.8762	601423064	0.999117	14010094	2941597	1.94
WHYD20120507_A	female	3.25556	28.8505	602643286	0.999	13997628	2951773	1.95
WHYD20120508_A	female	3.10556	28.8587	601069302	0.999097	14039049	2956820	1.95
WHYD20120509_A	female	3.375	28.6433	601092122	0.999035	14016729	2956329	1.95
WHYD20120510_A	male	3	28.9008	602736769	0.999014	13837546	2911418	1.95
WHYD20120511_A	female	3.33333	28.8605	602529269	0.999164	13851592	2914356	1.95
WHYD20120512_A	female	3.29444	28.9442	601521480	0.98959	14016364	2965125	1.95
WHYD20120513_A	female	3.41389	28.77	601063710	0.999039	13998860	2969356	1.95
WHYD20120514_A	female	3.24722	28.8448	602555896	0.999096	14019721	3001508	1.95
WHYD20120515_A	female	3.44444	28.8762	601622210	0.999035	13959486	2972247	1.95
WHYD20120516_A	female	3.20556	28.7206	601713466	0.999135	13995180	2976873	1.95
WHYD20120517_A	male	3.11389	28.8755	602816645	0.999168	13871416	2956684	1.95
WHYD20120518_A	male	3.24722	29.0774	603518535	0.99884	13749607	2960522	1.97
WHYD20120519_A	male	3.125	28.6943	601167772	0.990259	13860520	2937233	1.96
WHYD20120520_A	male	3.16944	28.9163	601300224	0.98929	13875247	2955534	1.99
WHYD20120521_A	male	3.43889	28.7213	602719469	0.999378	13857863	2962188	1.99
WHYD20120522_A	male	3.01389	28.6717	601281078	0.999383	13683479	2932695	1.99
WHYD20120523_A	male	3.20833	28.8357	601446237	0.999367	13698652	2935213	1.99
WHYD20120524_A	male	3.13611	28.7911	600495436	0.989016	13824891	2970700	1.99
WHYD20120525_A	male	3.10833	28.7117	602457526	0.999385	13836392	2974462	1.99
WHYD20120526_A	male	3.16667	28.868	602747218	0.999387	13829646	2976996	1.99
WHYD20120527_A	male	3.31944	28.7348	601072862	99.006	13782376	2939277	1.99
WHYD20120528_A	male	3.38333	28.6364	600710034	0.988746	13845380	2938988	1.99
WHYD20120529_A	male	6.43056	28.7241	602264436	0.999377	13717351	2941788	2
WHYD20120530_A	male	5.275	28.75	602113176	0.999374	13733140	2924753	1.99
WHYD20120531_A	female	7.15833	28.7637	602349756	0.999377	13914364	2970662	1.99
WHYD20120532_A	male	6.34722	28.9407	601620035	0.999384	13834473	2961825	1.99
WHYD20120533_A	male	14.75	28.767	602929584	0.999285	17237128	3387619	2.02
WHYD20120534_A	male	14	28.8717	602011137	0.999254	17741507	3453144	2.02
WHYD20120535_A	male	14.5806	28.8725	602440839	0.999266	17650376	3431113	2.02
WHYD20120536_A	female	9.16944	28.7916	602019712	0.999383	13916382	2950568	1.99
WHYD20120537_A	female	8.75	28.7028	600902604	0.990678	13992102	2961493	1.99
WHYD20120538_A	female	7.40833	28.7768	601317306	0.990628	13963561	2960360	1.99
WHYD20120539_A	female	9.27778	28.7199	600528508	0.990474	13906435	2975947	2
WHYD20120540_A	female	7.41667	29.3269	601631930	0.991286	13995373	2818391	1.94
WHYD20120541_A	male	5.43333	29.344	601793209	0.999356	13868444	2781801	1.94
WHYD20120542_A	female	8.31389	29.4098	602122879	0.999334	13980170	2799113	1.93
WHYD20120543_A	male	5.425	29.1957	601817567	0.999348	13748289	2771063	1.93
WHYD20120544_A	female	3.41944	29.3631	603344972	0.999304	13931320	2867131	1.96
WHYD20120545_A	female	3.34167	29.3309	602166757	0.999333	13950987	2816592	1.94
WHYD20120546_A	female	3.37778	29.2408	602384997	0.999259	13965108	2908269	1.95
WHYD20120547_A	female	3.34167	29.2106	601833623	0.999273	13946135	2830981	1.92
WHYD20120548_A	male	3.475	30.4825	630293040	0.99938	13861992	2794370	1.92
WHYD20120549_A	male	21	29.3519	603472477	0.999214	18057211	3336084	1.97
WHYD20120550_A	male	14	29.3371	601778866	0.999268	17200133	3241069	1.97
WHYD20120551_A	female	14.75	29.2536	601897397	0.999231	17801276	3267375	1.96
WHYD20120552_A	female	14.75	29.3232	602293330	0.999115	17899659	3374090	1.99
WHYD20120553_A	female	14.75	29.3053	603360368	0.999226	17768105	3378618	2
WHYD20120554_A	female	14.75	29.2459	601875708	0.999198	17992071	3330920	1.95
WHYD20120555_A	female	6.10278	29.2514	602251623	0.999337	14009676	2818286	1.93
WHYD20120556_A	female	6.28611	29.3874	602085840	0.999354	13950731	2800234	1.93
WHYD20120557_A	female	6.19444	29.3441	602697563	0.999364	14019135	2803744	1.93
WHYD20120558_A	female	6.49167	29.366	601510270	0.999382	13859358	2783284	1.94
WHYD20120559_A	male	7.15	29.2395	602846765	0.999214	17752579	3382027	2.03
WHYD20120560_A	male	5.38889	29.2546	602310200	0.999354	13715764	2859616	2
WHYD20120561_A	female	8.48056	29.0956	601379865	0.999382	13948193	2885504	2
WHYD20120562_A	female	7	29.1908	602279339	0.999361	13841400	2913554	2
WHYD20120563_A	female	5.44444	29.1587	602365354	0.999378	13830180	2897796	1.99
WHYD20120564_A	female	5.40833	29.0713	601583508	0.999361	13830148	2914164	1.99
WHYD20120565_A	female	7.26944	29.1839	602149834	0.999374	13885400	2896004	1.99
WHYD20120566_A	female	7.16389	29.2407	601319275	0.999389	13757261	2833738	2
WHYD20120567_A	female	4.06389	29.355	602484086	0.999384	13780297	2859113	2
WHYD20120568_A	female	4	29.3049	602458620	0.999381	13868376	2868159	1.99
WHYD20120569_A	female	3.83889	29.2041	602330465	0.999364	13820502	2880895	2
WHYD20120570_A	female	4.08056	29.3058	601238125	0.999309	13869994	2945986	1.99
WHYD20120571_A	female	4.19444	29.3081	601803436	0.999359	13771443	2863595	1.99
WHYD20120572_A	female	4.325	29.2235	601135673	0.999358	13750364	2847915	2
WHYD20120573_A	female	4.26667	29.0508	602700052	0.999441	13852707	2885272	1.99
WHYD20120574_A	female	4.19444	29.1589	601094054	0.998718	13818880	2870928	2
WHYD20120575_A	female	4.38889	29.2778	603208278	0.998702	13874794	2948719	2
WHYD20120576_A	female	4.15556	29.1977	602150312	0.998589	13955882	2960516	2
WHYD20120577_A	female	4.1	29.1477	603069877	0.998578	13931028	2942836	2
WHYD20120578_A	female	4.38611	29.0007	603431610	0.998666	13703848	2917121	2
WHYD20120579_A	female	4.38056	28.944	601668216	0.998604	13861708	2905371	2
WHYD20120580_A	female	4.5	29.075	600867240	0.99857	13887624	2956565	2
WHYD20120581_A	female	3.36944	29.2298	602204843	0.998553	13852952	2933351	2
WHYD20120582_A	female	4.43611	29.1608	600732037	0.998766	13797017	2890767	2
WHYD20120583_A	female	4.32778	29.194	601415443	0.998831	13861965	2907962	2
WHYD20120584_A	female	15.75	29.1399	602922475	0.998803	17258241	3361854	2.03
WHYD20120585_A	female	4.52778	29.0845	602957075	0.998884	13815951	2924783	2
WHYD20120586_A	female	4.34444	28.9116	601224947	0.998915	13867037	2898043	2
WHYD20120587_A	female	4.35	29.0236	601458070	0.998944	13862590	2899471	2
WHYD20120588_A	female	4.33611	28.9014	602341694	0.998899	13888702	2912926	1.99
WHYD20120589_A	female	4.45	29.0118	601462172	0.9987	13886252	2883538	1.99
WHYD20120590_A	male	4.67222	29.1288	602923520	0.999231	13781943	2835081	1.99
WHYD20120591_A	male	4.51111	29.1871	601727955	0.999358	13719048	2847247	2
WHYD20120592_A	male	4.375	29.1148	601770848	0.999358	13694655	2851017	2
WHYD20120593_A	male	4.33889	29.0383	601194469	0.999351	13790793	2864601	2
WHYD20120594_A	male	4.36389	28.8852	602479021	0.999355	13813112	3006238	2
WHYD20120595_A	male	4.43333	28.9175	602709337	0.999274	13995373	2818391
WHYD20120596_A	male	4.39722	29.2329	603315021	0.999317	13780443	2995183	2.01
WHYD20120597_A	male	4.43333	29.2248	605364487	0.999391	13848900	2998118	1.99
WHYD20120598_A	male	4.41389	29.1559	602780139	0.99929	13979142	2981577	1.99
WHYD20120599_A	female	4.38611	28.8585	602029983	0.99928	14010566	3037466	1.99
WHYD20120600_A	female	4.41944	29.0198	601769680	0.999358	13931937	3032189	2
WHYD20120602_A	female	4.425	28.8739	602784541	0.999295	13942982	3014765	1.99
WHYD20120603_A	female	4.34444	29.2787	602337732	0.999298	13914013	3008634	2
WHYD20120604_A	female	4.54444	28.9528	602587282	0.999361	13987228	3010141	2
WHYD20120605_A	male	4.41944	28.0056	602132749	0.999344	13852223	2977085	2
WHYD20120606_A	female	4.29167	29.1883	603031816	0.999308	13967612	2989497	1.99
WHYD20120607_A	female	4.14444	29.2098	603152336	0.999383	13946142	3025924	2
WHYD20120608_A	female	4.43889	29.1108	602557925	0.999371	13914922	3030767	2
WHYD20120609_A	female	4.35833	29.0574	604232409	0.999363	13987580	3056391	2
WHYD20120610_A	male	3.46111	29.2767	602888973	0.999313	13870125	3026114	2.01
WHYD20120612_A	female	15.6111	29.1887	603300716	0.999394	13994878	3050627	2
WHYD20120613_A	female	12.4528	29.091	603251278	0.999097	14001082	3044756	2
WHYD20120614_A	male	3.575	28.8182	604964824	0.99931	13877677	3034206	2
WHYD20120615_A	male	6	29.1682	605359606	0.999391	14078413	3046004	2
WHYD20120616_A	female	5.25556	28.9726	604645657	0.999221	14052163	2971297	1.97
WHYD20120617_A	female	7.34167	28.8336	603397741	0.999227	14081859	2993904	1.97
WHYD20120618_A	male	5.55	28.9022	602428674	0.999137	14329388	3006511	1.98
WHYD20120619_A	female	3.23889	28.9406	603564631	0.999244	13966327	2970021	1.97
WHYD20120620_A	female	8.38611	27.8666	589979963	0.975899	14030067	2999547	1.96
WHYD20120621_A	female	3.43611	28.5985	603663534	0.999163	14211256	2978476	1.96
WHYD20120622_A	male	3.37778	28.5665	603305052	0.999073	13900037	2968279	1.97
WHYD20120623_A	male	3.40278	28.8193	601930616	0.999231	13869120	2941643	1.97
WHYD20120624_A	female	4.31389	28.9202	604977910	0.999377	14182750	2983055	1.96
WHYD20120625_A	male	16	29.0235	605036087	0.99921	18024728	3512088	2
WHYD20120627_A	female	15.5389	28.9957	603979649	0.999373	14014883	2965264	1.96
WHYD20120628_A	female	4.34722	28.9265	602780001	0.999335	13561349	2903600	1.97
WHYD20120629_A	male	17	29.0486	603707571	0.999331	13732420	2933394	1.96
WHYD20120630_A	female	7.34722	29.002	606348150	0.999407	13957412	2960747	1.96
WHYD20120631_A	female	15.5167	28.8701	602444312	0.999414	14055894	2952042	1.95
WHYD20120633_A	female	13.2611	28.9672	603593989	0.999403	14079765	2950067	1.95
WHYD20120634_A	female	5.34722	28.7364	601782118	0.999398	14031473	2955411	1.97
WHYD20120635_A	male	11	29.0662	602070542	0.99938	13872246	2900198	1.95
WHYD20120636_A	male	10	29.0943	602219168	0.999382	13626570	2873646	1.96
WHYD20120637_A	female	14.35	28.8867	602511792	0.999361	14069504	2946942	1.95
WHYD20120638_A	female	4.34167	29.03	601385977	0.998942	13968908	2964082	1.96
WHYD20120640_A	male	3.35833	29.1307	602413614	0.999405	13814821	2893792	1.96
WHYD20120641_A	male	4.14444	29.079	602483072	0.999369	13925992	2899924	1.96
WHYD20120642_A	female	4.36111	29.1193	603792314	0.999403	14082401	2922095	1.95
WHYD20120643_A	female	15.4778	29.0085	604142639	0.999417	14130084	2939623	1.95
WHYD20120644_A	female	4.48056	29.016	602825788	0.999416	14085201	2964056	1.96
WHYD20120645_A	female	15.5083	28.9944	602071290	0.999383	13989516	2918225	1.96
WHYD20120646_A	male	16.75	28.9683	602781545	0.999381	13850832	2922112	1.96
WHYD20120647_A	female	15.3167	29.0576	599344464	0.993453	14003670	2997582	1.99
WHYD20120648_A	female	23.75	29.0135	602952593	0.999385	14070445	3027436	1.98
WHYD20120649_A	female	6.98611	29.3408	602894847	0.999158	13938741	2943993	1.99
WHYD20120650_A	female	6.20833	28.7983	602207555	0.999368	13910741	3005526	1.99
WHYD20120651_A	male	23	29.1844	602102701	0.999294	18903875	3730174	2.01
WHYD20120652_A	male	18	29.0877	602870566	0.999233	17479323	3530751	2.01
WHYD20120653_A	male	16.4528	29.1944	602862934	0.999283	13915755	2977914	1.98
WHYD20120654_A	male	15.5361	28.8249	593612553	0.984735	13738112	2929587	1.98
WHYD20120655_A	female	14.2806	29.1515	602635980	0.999271	13956962	2962729	1.99
WHYD20120656_A	female	15.6333	29.1401	601699337	0.999275	14084254	2989225	1.98
WHYD20120657_A	female	17.4056	29.2247	602953597	0.999086	14118533	2989466	1.98
WHYD20120658_A	female	15.5722	29.2332	602029172	0.999297	14011393	2968873	1.99
WHYD20120659_A	female	10.2833	28.7436	603417574	0.999263	14167225	3036526	1.98
WHYD20120660_A	male	17.75	29.0476	603073331	0.999268	13890251	2949516	1.98
WHYD20120661_A	female	16.4889	30.5385	632318163	0.999134	14025246	2983213	1.98
WHYD20120662_A	female	10.3194	29.0475	602737089	0.999365	13955284	2989205	1.98
WHYD20120663_A	female	14.5389	29.1182	598393693	0.992732	13918063	2978228	1.99
WHYD20120664_A	male	16.75	29.0512	601797053	0.996482	13829213	2958796	1.98
WHYD20120665_A	female	14.475	29.2349	602408695	0.998683	14014503	2981248	1.99
WHYD20120666_A	female	15.2361	29.0576	603320306	0.999151	14019642	2883037	1.95
WHYD20120667_A	female	12.2889	29.023	601943368	0.999257	13986972	2919895	1.96
WHYD20120668_A	female	14.3028	29.1336	602154973	0.998591	13995645	2915169	1.96
WHYD20120669_A	male	15.2556	29.045	601266405	0.999122	13912165	2914764	1.96
WHYD20120670_A	female	17.5694	29.2537	602360236	0.999086	13989641	2981210	1.96
WHYD20120671_A	female	16.5333	29.1101	603187174	0.999102	14033885	2960942	1.95
WHYD20120672_A	female	14.4417	28.8065	601389510	0.999204	13951892	2922191	1.96
WHYD20120673_A	female	13.4528	28.8771	602200521	0.999236	13975164	2972094	1.97
WHYD20120674_A	female	15.5556	29.1197	601570188	0.999204	13990433	2910986	1.95
WHYD20120675_A	female	15.75	28.9367	601942133	0.999135	14052998	2981491	1.96
WHYD20120676_A	female	17.5417	29.1901	602820429	0.999143	14004444	2961094	1.96
WHYD20120677_A	female	13.4222	29.0136	602303044	0.999102	13888421	2943377	1.96
WHYD20120678_A	female	15.6472	28.8138	601521037	0.99909	14015844	2965375	1.96
WHYD20120679_A	female	18.4639	28.9973	602684484	0.999182	12811632	2740717	1.95
WHYD20120680_A	male	11.375	29.1723	601822898	0.999182	13797722	2938005	1.96
WHYD20120681_A	female	17.4389	30.448	630419303	0.999186	14059499	2959887	1.96
WHYD20120682_A	male	14	29.2404	601494924	0.999358	13916632	2954963	1.98
WHYD20120683_A	male	15	29.2606	602326922	0.999218	13834606	2955986	1.99
WHYD20120684_A	male	14	29.1711	601465128	0.999342	13899984	2984731	1.99
WHYD20120685_A	male	14	28.9549	602289899	0.999199	13904233	2963678	1.99
WHYD20120688_A	male	10	29.0401	602085157	0.99897	13829280	2980270	2
WHYD20120689_A	female	18	29.2497	602584618	0.999186	13999950	2992306	1.99
WHYD20120690_A	male	14	29.304	602780874	0.999099	18059095	3552418	2.03
WHYD20120691_A	female	11	29.0154	601525388	0.999392	13942378	3028895	2
WHYD20120693_A	female	10	29.3258	601645719	0.999218	14869774	2879331	1.75
WHYD20120694_A	female	15	29.3366	602512388	0.999218	14282786	2935510	1.89
WHYD20120695_A	male	7	29.3098	601500935	0.999173	14505090	2817802	1.74
WHYD20120696_A	male	8.35	29.375	602725865	0.999155	14535415	2814121	1.75
WHYD20120697_A	male	8.35	29.34	601277475	0.999173	14526134	2809043	1.74
WHYD20120698_A	male	21.3444	29.4006	602833213	0.999234	14626829	2847056	1.75
WHYD20120699_A	male	7.35	29.4578	602869654	0.999224	15603136	2941926	1.77
WHYD20120700_A	male	8	29.3774	601891218	0.99923	14504681	2813929	1.77
WHYD20120701_A	male	11	29.087	602207200	0.999426	13447957	2896034	1.99
WHYD20120702_A	male	11	29.1441	601795323	0.999307	13292667	2885193	2
WHYD20120703_A	male	14	29.2646	603416301	0.999218	19445225	3745097	2.03
WHYD20120704_A	male	8	29.0425	601582834	0.999152	13854189	3007546	2
WHYD20120705_A	male	5.34444	29.1437	602808424	0.999342	13732799	2985459	1.99
WHYD20120706_A	male	5.34722	29.2712	601712608	0.999176	13750352	2951602	2
WHYD20120707_A	female	7.34444	29.0761	601551983	0.999359	13727646	2968389	1.99
WHYD20120708_A	male	5.34722	29.0265	602744833	0.999364	13717054	2964947	2
WHYD20120709_A	female	6.34722	29.0645	603188484	0.998911	20714530	3837265	2.02
WHYD20120710_A	male	5.35	29.2562	601370049	0.999289	13569997	2900633	2
WHYD20120711_A	male	15	29.2254	602054529	0.999129	17641806	3468536	2.02
WHYD20120712_A	male	15	29.3777	601737289	0.999147	17489274	3449884	2.03
WHYD20120713_A	female	14	29.3474	602351814	0.999149	19608386	3737645	2.04
WHYD20120714_A	male	6.325	29.2941	601599452	0.999287	13779158	2946742	2
WHYD20120715_A	male	7	29.221	602200006	0.999333	13849108	3000309	2
WHYD20120716_A	male	8.35833	29.3649	602399272	0.9993	13798055	2955866	2
WHYD20120717_A	male	7	29.151	602905060	0.999371	13841741	2982454	1.99
WHYD20120718_A	male	8.29167	28.9854	602608284	0.999356	13788767	2968272	2
WHYD20120719_A	male	7	29.301	601645349	0.999285	13841032	2956397	2
WHYD20120720_A	female	16.425	29.1993	602630349	0.999345	13922247	3019816	2
WHYD20120721_A	male	8	29.0058	601926137	0.999376	13813654	3011836	2
WHYD20120722_A	female	24	29.2517	602525898	0.999274	13847979	2983701	2
WHYD20120723_A	female	24	29.2632	602751602	0.999297	13724053	2966389	1.99
WHYD20120724_A	female	18.3639	29.2866	602451399	0.999362	13361511	2879567	1.99
WHYD20120726_A	female	19.4889	28.8981	602276179	0.999051	13874043	3003416	2
WHYD20120727_A	male	9.42222	28.979	601412512	0.99934	13770313	2973165	2
WHYD20120728_A	female	20.3639	29.0223	601509226	0.997577	13942566	2995096	2
WHYD20120729_A	female	20.75	29.0148	600611404	0.997608	13850526	3010418	2
WHYD20120730_A	female	20.075	29.1305	601266928	0.99928	13804381	2992954	2
WHYD20120731_A	female	17.4833	25.0971	522976562	0.928523	13863986	2997304	2.01
WHYD20120732_A	female	24	29.4118	602911324	0.999328	13634540	2919704	1.99
WHYD20120733_A	female	24	29.4439	601675503	0.998634	13691926	2906892	1.99
WHYD20120734_A	female	23	29.1666	602051126	0.998834	14631504	2886529	1.78
WHYD20120735_A	female	23	29.2987	601577639	0.999079	14634800	2818487	1.73
WHYD20120736_A	female	3.975	29.5231	602911146	0.999154	14656176	2837828	1.75
WHYD20120737_A	female	4.975	29.3688	602570908	0.999161	14632794	2813399	1.73
WHYD20120738_A	male	22.2556	29.3688	602081927	0.999104	14825884	2855304	1.73
WHYD20120739_A	female	15.4972	29.4969	602169342	0.999147	14821793	2868377	1.75
WHYD20120740_A	female	8.26389	29.3861	601577606	0.999204	14814969	2849738	1.73
WHYD20120741_A	female	11	29.4132	601790369	0.999185	14026713	2706070	1.74
WHYD20120743_A	female	11	29.4758	602816040	0.999334	14373797	2801219	1.79
WHYD20120744_A	female	8.31944	29.3492	601516300	0.999247	14372904	2932859	1.88
WHYD20120745_A	female	14.9194	29.4288	602477226	0.999307	14616540	2838947	1.8
WHYD20120746_A	male	9.28333	30.778	630582546	0.999197	14170747	2930177	1.92
WHYD20120747_A	female	9.35833	29.4143	602518606	0.999281	14752626	2861894	1.79
WHYD20120748_A	female	15.5222	29.3663	602768907	0.999339	14674389	2883534	1.81
WHYD20120749_A	female	17.3056	29.4111	601787452	0.999238	14762108	2885409	1.8
WHYD20120752_A	female	16.3528	29.2734	602647803	0.999192	13971846	3000336	1.99
WHYD20120755_A	female	13.15	29.2163	601605766	0.998315	13876733	2994427	2
WHYD20120756_A	female	15.4806	29.1883	601423224	0.999231	13931061	3008125	1.99
WHYD20120757_A	female	15.3194	29.3348	602574637	0.998995	17474884	3488905	2.02
WHYD20120758_A	female	18.3167	29.2422	602205893	0.999331	13897109	3007442	2
WHYD20120759_A	female	9.05	29.2965	601355515	0.998691	14004827	2998092	1.99
WHYD20120760_A	female	6.26389	29.3291	602035492	0.999332	13998796	2989068	2
WHYD20120761_A	female	8.40278	29.4967	602541237	0.9991	14758168	2872746	1.79
WHYD20120762_A	male	15.75	29.3967	601794543	0.999326	14498386	2839306	1.79
WHYD20120763_A	female	13.3361	30.3646	619967321	0.9993	14179151	2981466	1.94
WHYD20120764_A	female	20.3972	29.466	601860647	0.999163	14724354	2846188	1.74
WHYD20120765_A	female	16.3778	29.5005	602779998	0.999195	14788976	2861649	1.75
WHYD20120766_A	female	22.5167	29.4651	603386032	0.998449	13911333	2842289	1.84
WHYD20120767_A	female	17.1361	32.6075	670316145	0.999159	14186047	2945642	1.92
WHYD20120768_A	female	12.4583	29.3159	601130089	0.999278	14810948	2855777	1.78
WHYD20120770_A	female	18.2722	29.3246	602596073	0.999213	14110499	2981929	1.95
WHYD20120771_A	female	18.6028	29.426	601877346	0.999274	14688713	2878959	1.8
WHYD20120772_A	male	6	29.3243	603242694	0.99924	14271406	2912938	1.88
WHYD20120773_A	female	7	29.4199	603783827	0.998765	13971243	2871785	1.88
WHYD20120774_A	female	6	29.3805	602296105	0.999239	14348800	2925335	1.88
WHYD20120775_A	female	6	29.3597	603518692	0.99919	14265224	2962932	1.91
WHYD20120776_A	female	16.4333	29.2545	603158698	0.999407	14456181	2869734	1.84
WHYD20120777_A	female	17.1194	29.3074	602298815	0.999254	14365884	2953239	1.9
WHYD20120778_A	female	18	29.244	601835788	0.999188	14214586	2944060	1.89
WHYD20120779_A	female	16.4639	29.3228	601998598	0.999254	14724263	2861727	1.79
WHYD20120780_A	female	15.1167	29.3787	602106960	0.999259	14730686	2867913	1.78
WHYD20120781_A	female	24	29.1909	602314189	0.998353	13924480	2917291	1.91
WHYD20120782_A	female	29.75	29.2859	601267274	0.996974	14625287	2836486	1.79
WHYD20120784_A	female	24	29.4345	603992318	0.999205	14033593	2885967	1.88
WHYD20120785_A	female	7.35	29.3888	602592387	0.999264	14676084	2845424	1.8
WHYD20120787_A	male	6	29.5234	602480538	0.999277	14527822	2814466	1.8
WHYD20120789_A	male	6	29.3625	601106479	0.999268	14627601	2796843	1.78
WHYD20120790_A	female	7	29.4043	602969688	0.999301	14769326	2878801	1.8
WHYD20120791_A	female	7	29.423	601920128	0.999269	14601928	2869840	1.81
WHYD20120792_A	female	7	29.2965	601582192	0.999301	14771830	2872189	1.79
WHYD20120793_A	female	7	29.4249	602473187	0.999246	14230372	2970076	1.92
WHYD20120794_A	female	7	29.4531	602689462	0.999182	14662618	2846103	1.8
WHYD20120795_A	female	10.3361	29.5003	602370115	0.999332	14628925	2762349	1.81
WHYD20120796_A	male	23	29.191	602468018	0.999348	14549065	2836791	1.79
WHYD20120797_A	female	15.5028	29.4394	603328062	0.999258	13997876	2863803	1.87
WHYD20120798_A	female	15.4528	29.4065	603276108	0.999333	14755940	2882091	1.8
WHYD20120799_A	female	16.6	29.2315	602428225	0.999295	14791071	2872393	1.78
WHYD20120800_A	female	17.2222	29.271	602392383	0.999293	14774804	2867648	1.78
WHYD20120801_A	male	9.35	29.3691	603700698	0.999289	13723790	2913014	1.95
WHYD20120802_A	male	17.3694	29.2537	601271274	0.998507	14635800	2850537	1.8
WHYD20120803_A	female	25.75	29.0916	599039018	0.993112	14510532	2834348	1.81
WHYD20120804_A	female	22.5611	29.2775	602570549	0.999337	14714397	2856775	1.79
WHYD20120805_A	male	22	29.3811	604213616	0.999187	14330566	2966419	1.91
WHYD20120806_A	male	9	29.2893	602032748	0.999348	14469661	2811715	1.79
WHYD20120807_A	female	24.5167	29.3622	602444327	0.999257	13979751	2858684	1.87
WHYD20120808_A	female	22.75	29.5569	602614080	0.999272	14600886	2846017	1.79
WHYD20120809_A	female	14.15	29.3005	601687043	0.999263	14722641	2892359	1.8
WHYD20120810_A	female	24.75	29.4808	602774663	0.999319	14569740	2836969	1.79
WHYD20120811_A	female	19.4889	29.4347	602727395	0.999348	14665349	2832895	1.8
WHYD20120812_A	female	21.1389	29.2191	603256667	0.999359	14738152	2857460	1.78
WHYD20120813_A	female	19.075	29.2957	602123258	0.99933	14552026	2829872	1.78
WHYD20120814_A	female	21.75	32.2346	666763086	0.996264	14032922	2880216	1.91
WHYD20120815_A	female	20.0833	29.2283	601411235	0.999343	14592656	2832200	1.79
WHYD20120816_A	female	20.375	29.4373	602328124	0.999267	14746080	2837111	1.78
WHYD20120817_A	female	24.5667	29.401	601221225	0.999302	14592449	2837579	1.79
WHYD20120818_A	female	22.3528	29.4552	602461603	0.999294	14506946	2840641	1.79
WHYD20120819_A	female	23.4806	29.3703	602824490	0.999283	14475959	2851265	1.79
WHYD20120820_A	male	16.5333	29.3612	602905530	0.999255	14637526	2808323	1.73
WHYD20120821_A	female	23.5861	29.236	602518566	0.999185	15061270	2857769	1.72
WHYD20120822_A	female	25.75	29.4244	602517333	0.999177	14665787	2838767	1.74
WHYD20120823_A	male	21	29.2637	603658320	0.99914	14303270	2909854	1.85
WHYD20120824_A	female	23.75	29.2106	602697643	0.999227	14366038	2793996	1.74
WHYD20120825_A	female	25.75	29.3025	601378928	0.998888	14468174	2819477	1.76
WHYD20120826_A	female	21.5361	29.3236	602498615	0.999294	14447702	2836419	1.77
WHYD20120827_A	female	30.5444	29.2262	602689351	0.9981	14856690	2878003	1.77
WHYD20120828_A	female	19.0639	29.2568	604768688	0.999288	14834168	2838653	1.73
WHYD20120829_A	male	6	29.2548	603089255	0.999218	14918567	2842033	1.73
WHYD20120830_A	female	5	29.5263	601660649	0.999178	14858775	2854732	1.75
WHYD20120831_A	male	6	29.3131	602936523	0.99927	14765016	2868421	1.75
WHYD20120832_A	female	24.4972	29.4239	602653248	0.99917	14581965	2836695	1.74
WHYD20120833_A	female	21.5639	29.3739	601676225	0.999251	14791512	2859516	1.75
WHYD20120834_A	male	19	29.5383	602637941	0.999302	14502103	2805905	1.76
WHYD20120835_A	female	24.2694	29.3761	602439229	0.998928	14594029	2816408	1.74
WHYD201213843_A	female	13.4194	34.3175	716755187	0.999248	14456766	2983896	1.85
WHYD201213844_A	female	13.3833	34.0497	710919991	0.999248	14536831	2980438	1.84
WHYD201213845_A	male	10.5333	29.0602	601551237	0.999256	14569877	2872692	1.78
WHYD201213846_A	female	12.5194	29.0954	602224462	0.999308	14750716	2898919	1.76
WHYD201213847_A	female	14.1833	29.2172	603204162	0.999266	14713688	2906732	1.78
WHYD201213849_A	female	10.975	29.2587	603014065	0.99932	14438862	2870169	1.79
WHYD201213851_A	female	14.475	29.2299	603153751	0.999287	14656167	2905641	1.78
WHYD201213852_A	female	11.3472	29.1265	602013985	0.9993	14536606	2873966	1.78
WHYD201213853_A	male	11.5556	37.4266	784392854	0.999203	13794516	2887006	1.87
WHYD201213854_A	female	12.75	29.0075	602643357	0.99926	14174187	2812568	1.76
WHYD201213855_A	female	10.3528	29.0121	603269412	0.999349	14651101	2917928	1.79
WHYD201213856_A	female	10.125	29.2732	602799196	0.999276	14472742	2861888	1.78
WHYD201213857_A	male	12.75	29.2011	602954824	0.999257	14321914	2850196	1.79
WHYD201213858_A	female	7.04722	33.2619	694524815	0.999283	14651463	2972150	1.81
WHYD201213860_A	female	12.2722	33.3542	699593413	0.999193	14544020	3022684	1.88
WHYD201213862_A	female	12.325	41.9269	878613104	0.999244	14441399	3007538	1.86
WHYD201213865_A	female	11.3833	29.7314	625190198	0.999176	14164835	2976243	1.92
WHYD201213867_A	female	13.5222	43.8773	924355774	0.999273	14186907	3042167	1.94
WHYD201213870_A	female	11.75	28.9603	602829204	0.999306	14614693	2880436	1.77
WHYD201213871_A	male	13.1833	37.4811	784477223	0.999309	14235916	2998542	1.91
WHYD201213872_A	female	12.4917	29.0362	601674712	0.999311	14716793	2891237	1.77
WHYD201213873_A	female	14.3417	29.0507	602197643	0.999232	14673188	2893147	1.78
WHYD201213878_A	female	12.4167	36.5824	763192967	0.999309	14542447	2996621	1.85
WHYD201213881_A	female	12.275	37.2783	777451146	0.999258	14357175	3000815	1.88
WHYD201213882_A	male	18.4361	39.0253	817599085	0.999314	14245484	2997452	1.89
WHYD201213884_A	female	14.1167	29.0661	601564942	0.998873	14655007	2892687	1.78
WHYD201213886_A	male	9.075	32.2415	673073362	0.999236	14305735	2941346	1.85
WHYD201213888_A	female	13.5028	29.082	602561217	0.999229	14694524	2914031	1.78
WHYD201213890_A	female	14.2889	29.1058	602295468	0.999269	14730279	2895206	1.78
WHYD201213892_A	male	11.4944	35.5487	739441389	0.999321	13938954	2881776	1.85
WHYD201213893_A	female	15.2833	29.1346	603108274	0.999263	14712322	2913352	1.78
WHYD201213894_A	female	14.3083	41.154	867072832	0.999213	14255719	3031216	1.92
WHYD201213896_A	female	14.3944	39.4501	821733569	0.999245	14460836	3027288	1.88
WHYD201213897_A	female	12.4667	29.1147	602702028	0.999265	14718044	2897898	1.78
WHYD201213898_A	female	14.5361	29.0953	602640204	0.999259	14525576	2877596	1.77
WHYD201213899_A	female	10.425	28.9054	603977863	0.999284	14712176	2918396	1.8
WHYD201213900_A	male	14.575	29.137	602813865	0.999313	14620392	2883137	1.78
WHYD201213901_A	female	14.4667	29.0572	603163758	0.999268	14699506	2894259	1.76
WHYD201213902_A	female	14.4722	29.0571	602490809	0.999268	14762694	2906444	1.78
WHYD201213903_A	male	11.5222	35.9607	753159684	0.999168	14081687	2962637	1.9
WHYD201213904_A	male	15	37.3	792344354	0.999223	13756156	2960571	1.95
WHYD201213905_A	male	11.975	35.0937	733474817	0.999267	14250106	2928185	1.84
WHYD201213906_A	male	10	41.7023	870237454	0.999246	14085246	2993218	1.91
WHYD201213907_A	male	13.975	29.1429	602060444	0.999126	14211950	2826975	1.78
WHYD201213908_A	male	9.975	29.1027	602295060	0.999253	14350394	2834788	1.77
WHYD201213909_A	female	11	29.0669	602335389	0.999324	14637565	2860487	1.75
WHYD201213910_A	female	9.975	45.2818	952930263	0.999267	14212817	3005373	1.9
WHYD201213911_A	female	5.49444	44.5499	935531223	0.999275	14441891	3034763	1.89
WHYD201213912_A	female	12.5083	37.1468	777927033	0.999124	14366377	3008763	1.9
WHYD201213913_A	female	12.4556	30.3761	630240146	0.999313	14705537	2883181	1.76
WHYD201213914_A	female	10.1833	31.8632	661085719	0.999306	14902458	2928733	1.76
WHYD201213915_A	female	12.5167	33.5404	697287937	0.998689	14906275	2948407	1.76
WHYD201213916_A	male	10.75	36.7931	766884411	0.999338	14498901	2912991	1.78
WHYD201213917_A	male	9.34722	49.2695	1036169584	0.999287	14261734	3037999	1.93
WHYD201213919_A	female	8.34444	31.4211	653869214	0.999329	14804266	2913783	1.75
WHYD201213921_A	female	12.1222	35.1872	734314333	0.999231	14599529	2987464	1.83
WHYD201213922_A	female	15.3889	43.24	907122585	0.999278	14258407	3045692	1.93
WHYD201213923_A	female	10.1667	34.9613	728110211	0.999256	14620732	2998829	1.85
WHYD201213924_A	female	10.4722	34.0144	707440602	0.99928	14907580	2946547	1.76
WHYD201213925_A	female	10.5333	38.3633	798025262	0.999309	14615143	2944017	1.78
WHYD201213927_A	male	9.23056	32.7161	678077099	0.999308	14725385	2930083	1.79
WHYD201213928_A	male	9.15833	32.6739	681394802	0.99918	14365363	2960566	1.87
WHYD201213929_A	female	10.1778	39.8	830785610	0.999221	14381435	3028088	1.91
WHYD201213930_A	female	12.3194	33.9493	707277690	0.999015	14477043	2985110	1.88
WHYD201213931_A	male	9.39444	32.8271	680601188	0.999153	14398663	2935103	1.85
WHYD201213932_A	male	9.25278	33.926	704378337	0.999098	14420049	2950116	1.86
WHYD201213933_A	female	13.4778	32.6481	676580170	0.999132	14488750	2951756	1.85
WHYD201213934_A	female	10.4333	32.8164	677829004	0.99932	14781573	2960424	1.8
WHYD201213935_A	male	10.3639	34.6898	716219353	0.999326	14661233	2937433	1.8
WHYD201213936_A	male	10.3417	30.8555	638206235	0.999301	14657538	2917501	1.8
WHYD201213937_A	male	9.29444	51.259	1076777901	0.999343	13825705	3014353	1.98
WHYD201213938_A	male	11.0833	43.3894	902814566	0.999275	13720316	2957869	1.95
WHYD201213939_A	male	11.475	43.2999	901570174	0.999288	13687739	2951460	1.95
WHYD201213940_A	male	9.25556	38.0917	791466740	0.999297	13748544	2904030	1.89
WHYD201213941_A	male	14.5806	41.9633	869523103	0.999163	14125507	3017766	1.95
WHYD201213942_A	male	14.2556	32.3169	664867433	0.999284	14607607	2922298	1.81
WHYD201213943_A	male	9.43889	32.8779	677805516	0.999293	14736896	2929698	1.8
WHYD201213944_A	male	9.42222	30.0477	615554926	0.999237	14585907	2902961	1.8
WHYD201213945_A	male	9.34722	34.6728	717982868	0.999219	14394880	2959477	1.86
WHYD201213946_A	male	9.57222	40.1365	829990557	0.999273	14102321	2999285	1.93
WHYD201213947_A	female	10.1833	35.4498	743193790	0.999179	14293685	3013827	1.92
WHYD201213948_A	female	10.4583	31.3739	647598616	0.999287	14691599	2931565	1.81
WHYD201213949_A	female	10.4417	35.6844	744294521	0.99914	14502095	3026930	1.89
WHYD201213950_A	female	10.425	33.9005	697439765	0.999321	14680436	2952669	1.81
WHYD201213951_A	female	10.1083	32.7635	669502890	0.999188	14724835	2933979	1.81
WHYD201213952_A	female	10.1361	36.6007	754435061	0.9992	14470267	2994930	1.87
WHYD201213953_A	female	14.4361	35.78	737949904	0.999209	14585520	3009916	1.87
WHYD201213954_A	female	10.15	40.6935	843164174	0.999272	14235082	3035354	1.94
WHYD201213955_A	female	10.4639	35.5144	730042856	0.99924	14516872	2990515	1.87
WHYD201213956_A	female	13.1472	38.0341	784207766	0.999277	14569993	3017184	1.88
WHYD201213957_A	female	10.425	36.9557	765734328	0.999274	14416818	3008524	1.89
WHYD201213958_A	female	9.16667	30.7045	628041991	0.999182	14685917	2920585	1.81
WHYD201213960_A	female	10.2028	36.4176	753211007	0.999108	14541132	2988528	1.86
WHYD201213961_A	male	14.5806	34.214	704117374	0.999105	14140418	2902310	1.86
WHYD201213962_A	male	12.5	37.0687	764837966	0.999211	14435739	2996275	1.88
WHYD201213963_A	male	10.75	29.6586	602677138	0.999259	14352351	2888046	1.84
WHYD201213964_A	female	11.3917	37.0943	766101091	0.999113	14561046	2986612	1.85
WHYD201213965_A	female	12.4556	29.3566	602132356	0.999264	14617731	2913981	1.81
WHYD201213966_A	male	11.5444	36.9203	762438371	0.999282	14235687	2958772	1.87
WHYD201213967_A	male	9.36667	37.2382	772817921	0.999257	14257035	2989281	1.9
WHYD201213968_A	male	9.13056	37.0803	767486541	0.999266	14343701	2975418	1.87
WHYD201213969_A	male	9.32222	35.9818	745452576	0.999208	14270514	2982824	1.89
WHYD201213970_A	male	8.15278	34.1363	703960605	0.999085	14474684	2955976	1.85
WHYD201213971_A	male	9.29167	29.2479	603343402	0.999307	14557026	2918506	1.83
WHYD201213972_A	male	9.29444	34.6432	716382841	0.999251	14412848	2983916	1.87
WHYD201213973_A	male	9.27778	29.2886	601865535	0.999261	14591045	2908796	1.81
WHYD201213974_A	female	6.32222	34.2864	708171319	0.999139	14268685	2929272	1.86
WHYD201213975_A	male	9.3	32.9134	680460988	0.999239	14195783	2952935	1.89
WHYD201213976_A	female	12.4139	37.2951	770222396	0.999248	14452396	3006013	1.88
WHYD201213977_A	female	9.32778	32.939	682136639	0.998971	14412222	2970087	1.89
WHYD201213978_A	female	9.33889	35.7385	739340549	0.999225	14467987	2990525	1.87
WHYD201213979_A	female	13.5028	37.9168	784000806	0.999234	14323543	2992540	1.89
WHYD201213980_A	male	9.425	35.7232	740191482	0.999253	14315492	2983305	1.88
WHYD201213981_A	male	9.33889	29.254	601524262	0.9993	14590123	2900432	1.81
WHYD201213982_A	male	9.31667	35.1931	727972658	0.99905	14401168	2955181	1.86
WHYD201213983_A	male	14	37.3241	773695333	0.999288	13870119	2894699	1.88
WHYD201213984_A	male	9.40833	37.097	767269829	0.999145	14258626	2985445	1.91
WHYD201213985_A	male	9.33611	33.0974	685144866	0.999069	14366451	2937205	1.86
WHYD201213986_A	male	9.34722	42.7965	888958348	0.999302	14146800	3024977	1.94
WHYD201213987_A	female	14.3	36.8519	770473973	0.999256	14189807	3026433	1.94
WHYD201213988_A	male	8.375	36.9751	764644435	0.999252	14300262	2988423	1.89
WHYD201213989_A	female	17.3722	37.252	768974708	0.995222	14529440	3020635	1.89
WHYD201213990_A	female	10.5	39.664	821213765	0.999205	14325877	3028811	1.92
WHYD201213991_A	female	15.4472	28.7325	601787965	0.99934	13918272	3010589	1.99
WHYD201213992_A	female	13.4333	28.8611	602642584	0.999355	13858022	2992220	1.99
WHYD201213993_A	male	9.35	28.859	601435564	0.999329	13194940	2877225	1.99
WHYD201213994_A	female	14.3306	28.9213	603110633	0.999356	13978851	3011394	1.99
WHYD201213995_A	female	13.575	28.5397	601881636	0.999359	13829780	2993181	1.99
WHYD201213996_A	female	12.2806	28.5242	602752292	0.999364	13991535	3017481	1.99
WHYD201213997_A	female	14.3722	28.8318	601768242	0.998715	13922860	3003737	1.99
WHYD201213998_A	female	10.9583	28.8174	603065342	0.999383	13954994	3019499	1.99
WHYD201213999_A	female	14.4556	28.8544	601899952	0.999361	13930023	3009797	1.99
WHYD201214000_A	female	13.4833	29.0431	602600086	0.9993	13879468	2995928	1.99
WHYD201214001_A	female	15.4778	28.8256	602471893	0.999252	13941565	2996208	1.99
WHYD201214002_A	male	9.36667	28.7325	602237465	0.999374	13781131	2974739	1.99
WHYD201214003_A	female	15.4806	28.9938	602222181	0.9993	14010342	3009405	1.99
WHYD201214004_A	female	13.35	28.8608	602937288	0.999385	13768451	2981045	1.99
WHYD201214005_A	male	10.3472	28.4781	597987446	0.993222	13649705	2947684	1.99
WHYD201214006_A	female	10.35	28.826	602174465	0.999328	13871549	2988130	1.99
WHYD201214007_A	female	14.35	28.8326	602855236	0.999363	13820214	2984245	1.99
WHYD201214008_A	female	14.35	28.8248	601721707	0.99935	13720572	2959254	1.99
WHYD201214009_A	female	15.5583	28.8819	602726374	0.999337	13921934	2996569	1.99
WHYD201214010_A	female	14.2833	28.9367	602294325	0.999344	13991270	3009539	1.99
WHYD201214011_A	male	10	28.9489	602898645	0.999315	13813213	2976303	1.99
WHYD201214012_A	female	10.75	28.6867	602137512	0.999172	13701004	2954346	1.98
WHYD201214013_A	female	15.4056	28.8782	602171181	0.99929	13963312	3006065	1.99
WHYD201214014_A	female	13.3139	28.979	602079645	0.999294	13915997	2996087	1.98
WHYD201214015_A	male	11	28.7045	599310472	0.9932	13824367	2989546	1.99
WHYD201214016_A	female	12.425	28.4387	593461409	0.986224	13891777	3000375	1.99
WHYD201214017_A	male	11.4444	28.9622	601497494	0.999277	13353073	2897035	1.99
WHYD201214018_A	female	13.5194	27.5932	574440872	0.951799	13944069	3013310	1.99
WHYD201214019_A	female	11.35	28.9867	602000604	0.999257	13947072	3001783	1.99
WHYD201214020_A	female	10.35	28.8747	602998456	0.999346	13250235	2873549	1.98
WHYD201214021_A	male	9.35	28.9549	602164375	0.999337	13711955	2948062	1.98
WHYD201214022_A	male	10.35	28.8532	601678475	0.999267	13417335	2892602	1.98
WHYD201214023_A	male	11.5361	29.336	610394767	0.999238	13353521	2894366	1.99
WHYD201214024_A	female	14.5083	29.0338	601586217	0.999299	13958661	3007744	1.99
WHYD201214025_A	female	11.2222	29.1152	601773099	0.999299	13887859	2998418	1.99
WHYD201214026_A	female	15.4194	28.937	601921878	0.99843	13950266	3014643	1.99
WHYD201214027_A	female	14.3167	29.0344	601743906	0.999265	13923198	3003216	1.98
WHYD201214028_A	female	14.4556	28.9231	602053709	0.999265	13965671	2999676	1.98
WHYD201214029_A	female	9.37222	29.039	601793154	0.999283	13930063	2996968	1.98
WHYD201214030_A	female	14.525	28.9319	602992616	0.999266	14017210	3014931	1.99
WHYD201214031_A	male	9.32778	41.3547	860867461	0.99927	13963494	3018853	1.96
WHYD201214032_A	male	13.4806	48.9008	1019857902	0.999197	14083056	3037051	1.95
WHYD201214033_A	male	14	39.3724	816542594	0.999113	13983451	2961605	1.9
WHYD201214034_A	male	11.4278	38.2551	793332378	0.999236	13655816	2898619	1.89
WHYD201214035_A	male	14.5972	41.6516	864639881	0.999156	14014951	3012385	1.94
WHYD201214036_A	female	13.6083	39.1126	811381808	0.999241	14512036	3026670	1.87
WHYD201214037_A	female	14.1222	29.2825	602102850	0.999237	14653403	2883567	1.77
WHYD201214038_A	female	9.44167	45.1236	937918227	0.999225	14248860	3054274	1.95
WHYD201214039_A	female	13.3389	29.2598	602476897	0.999155	14722654	2902854	1.77
WHYD201214040_A	male	11.4583	43.6047	911055516	0.999261	13563305	2949987	1.96
WHYD201214041_A	female	14.4278	41.636	875390503	0.999169	14253374	3055980	1.94
WHYD201214042_A	female	13.5	38.6997	804117306	0.999218	14438098	3039449	1.89
WHYD201214043_A	female	9.43889	45.8199	958421508	0.999259	14157716	3062104	1.96
WHYD201214044_A	female	10.3167	29.3289	603326520	0.999259	14765045	2917636	1.78
WHYD201214045_A	male	11.4861	38.7576	801767700	0.999221	13872308	2908696	1.88
WHYD201214046_A	female	9	39.6627	827340249	0.993874	14361703	3031993	1.9
WHYD201214047_A	female	14.5278	29.2615	602642712	0.999216	14678266	2877301	1.76
WHYD201214048_A	female	9.48611	41.3408	860144137	0.99918	14217812	3031968	1.93
WHYD201214049_A	female	10.2583	36.6215	759279261	0.999168	14353098	3006771	1.88
WHYD201214050_A	male	12.4778	37.0714	770032960	0.999245	14459961	2997361	1.86
WHYD201214051_A	female	14.3806	44.8305	932607870	0.999283	14178666	3050514	1.95
WHYD201214052_A	female	10.2056	37.6066	779253897	0.999156	14547877	3016154	1.86
WHYD201214053_A	female	14.4778	36.2689	755807805	0.999104	14477055	2986955	1.86
WHYD201214054_A	female	14.3917	39.7262	821053584	0.994271	14384787	3022847	1.89
WHYD201214055_A	male	11	29.3674	602111104	0.999151	14755462	2848745	1.77
WHYD201214056_A	female	13.5139	37.7521	779109204	0.99916	14491258	3008032	1.87
WHYD201214057_A	female	11.4583	36.1618	745922625	0.99894	14556309	2977489	1.83
WHYD201214058_A	male	12.3778	38.8236	799574922	0.999039	14304865	2951718	1.86
WHYD201214059_A	male	12.35	39.3657	811789307	0.999221	14176919	2980589	1.9
WHYD201214060_A	male	9.34444	35.1943	725780596	0.998946	14048848	2887728	1.86
WHYD201214061_A	male	9.31667	39.2941	816210056	0.999171	14292291	3008502	1.89
WHYD201214062_A	male	8.34444	44.687	935463622	0.999273	14023968	3046392	1.97
WHYD201214063_A	male	6.35	40.066	827440462	0.999088	13923769	2952681	1.9
WHYD201214064_A	female	14.375	41.4406	860578432	0.999103	14255028	3050488	1.94
WHYD201214065_A	female	11.4222	43.6878	908827797	0.998769	14258753	3052566	1.94
WHYD201214066_A	female	12.375	33.9885	705103800	0.997455	14462622	2968793	1.85
WHYD201214067_A	female	10.3361	41.8791	871746438	0.999219	14182159	3042412	1.94
WHYD201214068_A	male	10.75	36.8164	757738338	0.999153	13639212	2873861	1.88
WHYD201214069_A	female	14.4778	44.5734	926389958	0.997245	14251334	3055703	1.94
WHYD201214070_A	female	10.275	41.1059	856014129	0.999182	14016626	3029119	1.96
WHYD201214071_A	female	21.2583	41.8055	872832280	0.999253	13977387	3024817	1.95
WHYD201214072_A	female	14.4778	38.3041	799973575	0.997386	14058681	3056552	1.98
WHYD201214073_A	male	13.4806	38.5642	802277773	0.998762	14235821	2988056	1.91
WHYD201214074_A	female	14.6056	39.6142	830087598	0.996095	13906815	3030431	1.98
WHYD201214075_A	female	10.3389	40.2503	837774440	0.998869	14256236	3026532	1.92
WHYD201214076_A	female	10.3333	34.907	721640089	0.999064	14561139	2994541	1.86
WHYD201214077_A	female	14.4583	42.4901	888449083	0.999174	13460784	2916223	1.94
WHYD201214078_A	female	14.75	44.259	925306835	0.999259	14119680	3067878	1.97
WHYD201214079_A	female	14.4833	32.6403	673805458	0.999008	14374839	2960479	1.86
WHYD201214080_A	female	12.4528	43.3288	907730896	0.999091	14167524	3067250	1.96
WHYD201214081_A	female	13.5028	34.9147	721154593	0.999001	14214547	2975831	1.9
WHYD201214082_A	male	11.3333	35.6929	740726581	0.999073	14195416	2989302	1.92
WHYD201214083_A	female	14.5333	37.9925	790867191	0.999154	14352559	3019788	1.9
WHYD201214084_A	female	12.4167	34.3412	710160692	0.998995	14628833	2983123	1.85
WHYD201214085_A	female	13.425	44.4997	929988004	0.999327	14251808	3083116	1.97
WHYD201214086_A	male	11.3806	32.9014	679985778	0.998965	14146271	2901349	1.85
WHYD201214087_A	female	13.3139	33.333	689168562	0.999007	14454941	2977907	1.87
WHYD201214088_A	female	14.75	33.7933	697973745	0.998953	14458437	2995125	1.87
WHYD201214089_A	female	14.5833	35.559	734222227	0.998843	14375745	2976765	1.89
WHYD201214090_A	female	14.5833	33.6439	695891072	0.998983	14570956	2979957	1.84
WHYD201214091_A	male	14.3306	34.8354	719962167	0.999106	14053555	2956649	1.92
WHYD201214092_A	female	13.4389	35.9264	742680880	0.999048	14547794	2978573	1.85
WHYD201214093_A	female	13.2222	32.9426	680239472	0.998985	14606643	2977967	1.84
WHYD201214094_A	male	11.5806	33.5293	691763610	0.998994	13947710	2880908	1.86

## Sheet: Supplementary Table 2
Supplementary Table 2. Details of the high confidence pLoF and their interaction with following six gene lists: ClinGen haploinsufficient, essential in culture, essential in mice, OMIM disease genes of autosomal dominant and autosomal recessive, and drug target in DrugBank. In the six gene lists, "1" represents having an interaction, while "0" represents no interaction. Note: Gene lists are avail…
Chromosome	Position	Reference allele	Alternative allele	Gene Symbol	Frequency	Number of homozygetes	Number of heterozygetes	Variant type|Gene symbol|AA.pos	Autosomal dominant	Autosoma recessive	Drug target	Essential in mice	Essential in culture	Haplo-insufficient	Total number of six gene lists
chr1	529616	CAT	C	OR9G1	0.000564972	0	1	frameshift_variant|OR9G1|p.Tyr148fs	0	0	0	0	0	0	0
chr1	11170565	ACT	A	ZP4	0.000564972	0	1	frameshift_variant|ZP4|p.Ser145fs	0	0	0	0	0	0	0
chr1	12507793	C	T	LGALS8	0.000564972	0	1	splice_donor_variant&intron_variant|LGALS8|	0	0	0	0	0	0	0
chr1	13870813	G	A	RBM34	0.000564972	0	1	splice_donor_variant&intron_variant|RBM34|	0	0	0	0	0	0	0
chr1	14662478	G	A	COA6	0.000564972	0	1	stop_gained|COA6|p.Arg34*	0	0	0	0	0	0	0
chr1	16983925	G	A	DISC1	0.000564972	0	1	stop_gained|DISC1|p.Arg699*	0	0	0	0	0	0	0
chr1	23183313	CG	C	ALDH9A1	0.000564972	0	1	frameshift_variant&splice_region_variant|ALDH9A1|p.Arg62fs	0	1	1	0	0	0	2
chr1	24218895	G	A	TADA1	0.000564972	0	1	stop_gained|TADA1|p.Gln131*	0	0	0	0	0	0	0
chr1	25178197	AGAAG	A	ADCY10	0.000564972	0	1	frameshift_variant|ADCY10|p.Leu1346fs	0	0	0	0	0	0	0
chr1	28507047	G	T	FMO2	0.000564972	0	1	stop_gained|FMO2|p.Glu32*	0	0	0	0	0	0	0
chr1	28661504	T	TC	FMO4	0.000564972	0	1	frameshift_variant&splice_region_variant|FMO4|p.Gly162fs	0	0	0	0	0	0	0
chr1	30776155	G	GA	PRDX6	0.000564972	0	1	splice_donor_variant&intron_variant|PRDX6|	0	0	1	0	0	0	1
chr1	32365404	G	T	TNN	0.000564972	0	1	splice_acceptor_variant&intron_variant|TNN|	0	0	0	0	0	0	0
chr1	32381821	CAG	C	TNN	0.000564972	0	1	frameshift_variant|TNN|p.Asn811fs	0	0	0	0	0	0	0
chr1	36579566	GGTAA	G	AXDND1	0.000564972	0	1	splice_donor_variant&splice_region_variant&intron_variant|AXDND1|	0	0	0	0	0	0	0
chr1	39838365	C	CAGAATGT	RNASEL	0.000564972	0	1	frameshift_variant|RNASEL|p.Asp349fs	1	0	0	0	0	0	1
chr1	43250500	A	G	HMCN1	0.000564972	0	1	splice_acceptor_variant&intron_variant|HMCN1|	0	0	0	0	0	0	0
chr1	52842003	G	GTTCA	ENSMMUG00000056654	0.000564972	0	1	frameshift_variant|ENSMMUG00000056654|p.Leu78fs	0	0	0	0	0	0	0
chr1	52842194	ACATCT	A	ENSMMUG00000056654	0.000564972	0	1	frameshift_variant|ENSMMUG00000056654|p.Glu12fs	0	0	0	0	0	0	0
chr1	58015382	C	A	KIF14	0.000564972	0	1	stop_gained|KIF14|p.Glu963*	0	0	0	0	0	0	0
chr1	58490805	CTCTA	C	CACNA1S	0.000564972	0	1	frameshift_variant|CACNA1S|p.Ile983fs	1	0	1	1	0	0	3
chr1	59768262	GA	G	UBE2T	0.000564972	0	1	frameshift_variant|UBE2T|p.Leu71fs	0	0	0	0	0	0	0
chr1	62863403	G	A	KLHDC8A	0.000564972	0	1	stop_gained|KLHDC8A|p.Arg260*	0	0	0	0	0	0	0
chr1	63363825	TC	T	PM20D1	0.000564972	0	1	frameshift_variant|PM20D1|p.Ser311fs	0	0	0	0	0	0	0
chr1	64542228	TC	T	C1H1orf116	0.000564972	0	1	frameshift_variant|C1H1orf116|p.Arg43fs	0	0	0	0	0	0	0
chr1	64577315	G	A	PFKFB2	0.000564972	0	1	stop_gained|PFKFB2|p.Trp64*	0	0	0	0	0	0	0
chr1	64983515	G	T	CR2	0.000564972	0	1	stop_gained|CR2|p.Glu311*	0	0	0	0	0	0	0
chr1	65053204	C	T	CR1	0.000564972	0	1	stop_gained|CR1|p.Arg586*	0	0	0	0	0	0	0
chr1	80190738	AG	A	HHIPL2	0.000564972	0	1	frameshift_variant|HHIPL2|p.Leu366fs	0	0	0	0	0	0	0
chr1	80196467	TC	T	HHIPL2	0.000564972	0	1	frameshift_variant|HHIPL2|p.Glu95fs	0	0	0	0	0	0	0
chr1	81413132	C	CA	TP53BP2	0.000564972	0	1	frameshift_variant|TP53BP2|p.Leu382fs	0	0	0	1	0	0	1
chr1	83954425	T	A	PARP1	0.000564972	0	1	stop_gained|PARP1|p.Lys182*	0	0	1	1	0	0	2
chr1	84681736	GTTCT	G	CDC42BPA	0.000564972	0	1	frameshift_variant|CDC42BPA|p.Lys720fs	0	0	0	0	0	0	0
chr1	85192358	C	T	ENSMMUG00000031497	0.000564972	0	1	stop_gained|ENSMMUG00000031497|p.Gln34*	0	0	0	0	0	0	0
chr1	86002262	TG	T	H3	0.000564972	0	1	frameshift_variant|H3|p.His114fs	0	0	0	0	0	0	0
chr1	89585526	T	TG	CFAP126	0.000564972	0	1	frameshift_variant|CFAP126|p.Cys63fs	0	0	0	0	0	0	0
chr1	89716932	C	T	NR1I3	0.000564972	0	1	stop_gained|NR1I3|p.Arg91*	0	0	1	0	0	0	1
chr1	89983652	G	A	ITLN2	0.000564972	0	1	stop_gained|ITLN2|p.Trp110*	0	0	0	0	0	0	0
chr1	89987230	GC	G	ITLN2	0.000564972	0	1	frameshift_variant|ITLN2|p.Lys275fs	0	0	0	0	0	0	0
chr1	91114240	C	T	SLAMF8	0.000564972	0	1	splice_acceptor_variant&intron_variant|SLAMF8|	0	0	0	0	0	0	0
chr1	91136328	C	T	FCRL6	0.000564972	0	1	splice_donor_variant&intron_variant|FCRL6|	0	0	0	0	0	0	0
chr1	92720928	G	A	CD1C	0.000564972	0	1	stop_gained|CD1C|p.Arg280*	0	0	0	0	0	0	0
chr1	94589669	T	TGGTAGAC	RHBG	0.000564972	0	1	frameshift_variant|RHBG|p.His217fs	0	0	0	0	0	0	0
chr1	94653063	T	G	CCT3	0.000564972	0	1	splice_donor_variant&intron_variant|CCT3|	0	0	1	1	1	0	3
chr1	94957134	G	A	SSR2	0.000564972	0	1	splice_donor_variant&intron_variant|SSR2|	0	0	0	0	0	0	0
chr1	95537642	C	T	ASH1L	0.000564972	0	1	stop_gained|ASH1L|p.Arg1305*	0	1	0	0	0	1	2
chr1	95657141	A	G	ASH1L	0.000564972	0	1	splice_acceptor_variant&intron_variant|ASH1L|	0	1	0	0	0	1	2
chr1	95761765	GC	G	SCAMP3	0.000564972	0	1	frameshift_variant|SCAMP3|p.Ala197fs	0	0	0	0	0	0	0
chr1	95978457	C	T	ADAM15	0.000564972	0	1	splice_donor_variant&intron_variant|ADAM15|	0	0	0	0	0	0	0
chr1	96009243	T	G	DCST2	0.000564972	0	1	splice_donor_variant&intron_variant|DCST2|	0	0	0	0	0	0	0
chr1	96081858	T	C	PBXIP1	0.000564972	0	1	splice_donor_variant&intron_variant|PBXIP1|	0	0	0	0	0	0	0
chr1	97386404	C	CGGGCG	NPR1	0.000564972	0	1	frameshift_variant|NPR1|p.Ala97fs	0	0	1	0	0	0	1
chr1	98644318	G	GAA	CRNN	0.000564972	0	1	frameshift_variant|CRNN|p.Ser252fs	0	0	0	0	0	0	0
chr1	98970669	AAGGC	A	ENSMMUG00000045342	0.000564972	0	1	frameshift_variant|ENSMMUG00000045342|p.Arg95fs	0	0	0	0	0	0	0
chr1	99925856	C	T	VPS72	0.000564972	0	1	stop_gained|VPS72|p.Gln149*	0	0	0	0	0	0	0
chr1	103260945	TC	T	HJV	0.000564972	0	1	frameshift_variant|HJV|p.Pro163fs	0	0	0	0	0	0	0
chr1	104673721	A	AC	ZNF697	0.000564972	0	1	frameshift_variant|ZNF697|p.Glu119fs	0	0	0	0	0	0	0
chr1	106324966	A	G	WDR3	0.000564972	0	1	splice_donor_variant&intron_variant|WDR3|	0	0	0	0	1	0	1
chr1	107245454	TC	T	CD101	0.000564972	0	1	frameshift_variant|CD101|p.Glu633fs	0	0	0	0	0	0	0
chr1	107245707	G	A	CD101	0.000564972	0	1	stop_gained|CD101|p.Gln549*	0	0	0	0	0	0	0
chr1	108215721	G	A	SLC22A15	0.000564972	0	1	stop_gained|SLC22A15|p.Arg367*	0	0	0	0	0	0	0
chr1	110327847	G	GC	BCL2L15	0.000564972	0	1	frameshift_variant|BCL2L15|p.Cys46fs	0	0	0	0	0	0	0
chr1	111499574	AG	A	PPM1J	0.000564972	0	1	splice_acceptor_variant&intron_variant|PPM1J|	0	0	0	0	0	0	0
chr1	112863097	TAG	T	CHIA	0.000564972	0	1	frameshift_variant|CHIA|p.Tyr77fs	0	0	0	0	0	0	0
chr1	113616945	GTGATC	G	KCNA10	0.000564972	0	1	frameshift_variant|KCNA10|p.Val88fs	0	0	1	0	0	0	1
chr1	114467962	TCA	T	GSTM2	0.000564972	0	1	frameshift_variant|GSTM2|p.Leu123fs	0	0	1	0	0	0	1
chr1	129309605	AG	A	SLC44A3	0.000564972	0	1	frameshift_variant|SLC44A3|p.Ser177fs	0	0	0	0	0	0	0
chr1	130282380	C	T	DNTTIP2	0.000564972	0	1	stop_gained|DNTTIP2|p.Arg637*	0	0	0	0	0	0	0
chr1	130986755	T	A	CCDC18	0.000564972	0	1	stop_gained|CCDC18|p.Lys30*	0	0	0	0	0	0	0
chr1	132203175	G	A	BRDT	0.000564972	0	1	stop_gained|BRDT|p.Arg636*	0	0	0	0	0	0	0
chr1	132869179	AGAGGTTT	A	HFM1	0.000564972	0	1	frameshift_variant|HFM1|p.Arg1099fs	0	0	0	0	0	0	0
chr1	135203301	TGC	T	GBP7	0.000564972	0	1	frameshift_variant|GBP7|p.Leu219fs	0	0	0	0	0	0	0
chr1	135603341	G	A	GTF2B	0.000564972	0	1	splice_donor_variant&intron_variant|GTF2B|	0	0	0	0	1	0	1
chr1	138006850	G	A	CLCA1	0.000564972	0	1	stop_gained|CLCA1|p.Gln308*	0	0	0	0	0	0	0
chr1	138007278	AG	A	CLCA1	0.000564972	0	1	frameshift_variant|CLCA1|p.Leu222fs	0	0	0	0	0	0	0
chr1	139379743	A	AT	MCOLN3	0.000564972	0	1	frameshift_variant|MCOLN3|p.Val122fs	0	0	0	1	0	0	1
chr1	139753531	CAA	C	SSX2IP	0.000564972	0	1	frameshift_variant|SSX2IP|p.Lys91fs	0	0	0	0	0	0	0
chr1	139852113	GA	G	CTBS	0.000564972	0	1	frameshift_variant|CTBS|p.Thr36fs	0	0	0	0	0	0	0
chr1	145754078	C	G	IFI44	0.000564972	0	1	splice_donor_variant&intron_variant|IFI44|	0	0	0	0	0	0	0
chr1	145759248	T	C	IFI44	0.000564972	0	1	splice_acceptor_variant&intron_variant|IFI44|	0	0	0	0	0	0	0
chr1	149915195	GA	G	TNNI3K	0.000564972	0	1	frameshift_variant|TNNI3K|p.Ser857fs	0	0	1	0	0	0	1
chr1	149942774	A	C	TNNI3K	0.000564972	0	1	splice_donor_variant&intron_variant|TNNI3K|	0	0	1	0	0	0	1
chr1	150036054	TA	T	TNNI3K	0.000564972	0	1	splice_donor_variant&intron_variant|TNNI3K|	0	0	1	0	0	0	1
chr1	153435951	T	C	PTGER3	0.000564972	0	1	splice_donor_variant&intron_variant|PTGER3|	0	0	1	0	0	0	1
chr1	155680875	G	GC	ENSMMUG00000007527	0.000564972	0	1	frameshift_variant|ENSMMUG00000007527|p.His493fs	0	0	0	0	0	0	0
chr1	161047411	GT	G	ALG6	0.000564972	0	1	frameshift_variant|ALG6|p.Leu214fs	0	1	0	0	0	0	1
chr1	161835273	G	A	ANGPTL3	0.000564972	0	1	stop_gained|ANGPTL3|p.Gln268*	0	1	0	0	0	0	1
chr1	162242677	G	GT	L1TD1	0.000564972	0	1	frameshift_variant|L1TD1|p.Thr114fs	0	0	0	0	0	0	0
chr1	162368070	C	T	PATJ	0.000564972	0	1	splice_donor_variant&intron_variant|PATJ|	0	0	0	0	0	0	0
chr1	167543127	TG	T	C8A	0.000564972	0	1	frameshift_variant|C8A|p.Thr193fs	1	0	1	0	0	0	2
chr1	167543225	GT	G	C8A	0.000564972	0	1	frameshift_variant|C8A|p.Thr160fs	1	0	1	0	0	0	2
chr1	169797664	C	T	FAM151A	0.000564972	0	1	stop_gained|FAM151A|p.Arg65*	0	0	0	0	0	0	0
chr1	169808200	G	C	FAM151A	0.000564972	0	1	splice_acceptor_variant&intron_variant|FAM151A|	0	0	0	0	0	0	0
chr1	170225530	TACGGTAC	T	CYB5RL	0.000564972	0	1	frameshift_variant&splice_donor_variant&splice_region_variant&intron_variant|CYB5RL|p.Arg116fs	0	0	0	0	0	0	0
chr1	170364334	G	GGAAGAGGA	TMEM59	0.000564972	0	1	splice_donor_variant&intron_variant|TMEM59|	0	0	0	0	0	0	0
chr1	170376556	G	A	TMEM59	0.000564972	0	1	splice_donor_variant&intron_variant|TMEM59|	0	0	0	0	0	0	0
chr1	170549871	C	T	NDC1	0.000564972	0	1	stop_gained|NDC1|p.Gln159*	0	0	0	0	0	0	0
chr1	171202667	A	ACGCC	CPT2	0.000564972	0	1	frameshift_variant|CPT2|p.Ile359fs	0	1	1	0	0	0	2
chr1	171565193	C	CATTGGAT	ZYG11A	0.000564972	0	1	frameshift_variant|ZYG11A|p.Ala487fs	0	0	0	0	0	0	0
chr1	177852167	G	A	KNCN	0.000564972	0	1	splice_acceptor_variant&intron_variant|KNCN|	0	0	0	0	0	0	0
chr1	181014395	TGATCGAA	T	HYI	0.000564972	0	1	frameshift_variant|HYI|p.Asp117fs	0	0	0	0	0	0	0
chr1	185009637	G	C	PABPC4	0.000564972	0	1	splice_donor_variant&intron_variant|PABPC4|	0	0	0	0	0	0	0
chr1	185262116	CTT	C	MACF1	0.000564972	0	1	frameshift_variant|MACF1|p.Gln1520fs	0	0	0	1	0	0	1
chr1	188260549	GT	G	SH3D21	0.000564972	0	1	frameshift_variant|SH3D21|p.Thr709fs	0	0	0	0	0	0	0
chr1	188704538	CT	C	AGO1	0.000564972	0	1	frameshift_variant|AGO1|p.Glu234fs	0	0	0	0	0	0	0
chr1	189448993	T	G	SFPQ	0.000564972	0	1	splice_donor_variant&intron_variant|SFPQ|	0	0	1	0	0	0	1
chr1	192446049	G	T	TMEM234	0.000564972	0	1	stop_gained|TMEM234|p.Glu37*	0	0	0	0	0	0	0
chr1	195582826	C	A	EPB41	0.000564972	0	1	stop_gained|EPB41|p.Glu973*	1	1	0	0	0	0	2
chr1	199388587	C	CT	ENSMMUG00000011156	0.000564972	0	1	frameshift_variant|ENSMMUG00000011156|p.Thr32fs	0	0	0	0	0	0	0
chr1	200606601	G	GA	IL22RA1	0.000564972	0	1	frameshift_variant|IL22RA1|p.Leu191fs	0	0	0	0	0	0	0
chr1	201821251	C	T	LACTBL1	0.000564972	0	1	stop_gained|LACTBL1|p.Arg178*	0	0	0	0	0	0	0
chr1	202487433	GT	G	ENSMMUG00000046184	0.000564972	0	1	frameshift_variant|ENSMMUG00000046184|p.Phe127fs	0	0	0	0	0	0	0
chr1	207735352	T	TAACC	SDHB	0.000564972	0	1	frameshift_variant|SDHB|p.Cys101fs	1	0	1	0	0	1	3
chr1	211546689	A	C	ENSMMUG00000058407	0.000564972	0	1	splice_acceptor_variant&intron_variant|ENSMMUG00000058407|	0	0	0	0	0	0	0
chr1	211637987	AGT	A	ENSMMUG00000054309	0.000564972	0	1	frameshift_variant|ENSMMUG00000054309|p.Val442fs	0	0	0	0	0	0	0
chr1	212127208	C	CTGTAA	VPS13D	0.000564972	0	1	frameshift_variant|VPS13D|p.Arg2644fs	0	0	0	1	0	0	1
chr1	216713568	C	T	PER3	0.000564972	0	1	stop_gained|PER3|p.Trp371*	0	0	0	0	0	0	0
chr1	218381623	C	A	CHD5	0.000564972	0	1	stop_gained|CHD5|p.Cys384*	0	0	0	0	0	0	0
chr1	220657989	ACCAAGAT	A	CEP104	0.000564972	0	1	frameshift_variant|CEP104|p.Asp207fs	0	0	0	0	0	0	0
chr1	221790645	G	T	MMEL1	0.000564972	0	1	stop_gained|MMEL1|p.Glu324*	0	0	0	0	0	0	0
chr1	223223450	TGTGCCCG	T	TTLL10	0.000564972	0	1	frameshift_variant|TTLL10|p.Ser566fs	0	0	0	0	0	0	0
chr1	223374392	TCA	T	AGRN	0.000564972	0	1	frameshift_variant|AGRN|p.Cys858fs	0	1	0	1	0	0	2
chr2	341888	C	CTG	LRCH3	0.000564972	0	1	frameshift_variant|LRCH3|p.Gly294fs	0	0	0	0	0	0	0
chr2	583226	C	T	ENSMMUG00000047184	0.000564972	0	1	splice_donor_variant&intron_variant|ENSMMUG00000047184|	0	0	0	0	0	0	0
chr2	604122	A	G	ENSMMUG00000047184	0.000564972	0	1	splice_donor_variant&intron_variant|ENSMMUG00000047184|	0	0	0	0	0	0	0
chr2	1234428	T	TC	RNF168	0.000564972	0	1	frameshift_variant|RNF168|p.Glu257fs	0	1	0	0	0	0	1
chr2	10542251	A	AAT	MASP1	0.000564972	0	1	frameshift_variant&splice_region_variant|MASP1|p.Lys104fs	0	0	0	0	0	0	0
chr2	15356437	T	TG	CMTM8	0.000564972	0	1	frameshift_variant|CMTM8|p.Thr97fs	0	0	0	0	0	0	0
chr2	27746295	GA	G	PP2D1	0.000564972	0	1	frameshift_variant|PP2D1|p.Ile143fs	0	0	0	0	0	0	0
chr2	31472569	G	A	GALNT15	0.000564972	0	1	stop_gained|GALNT15|p.Gln346*	0	0	0	0	0	0	0
chr2	32104250	A	G	HACL1	0.000564972	0	1	splice_acceptor_variant&intron_variant|HACL1|	0	0	0	0	0	0	0
chr2	32716715	A	ACGTT	COL6A5	0.000564972	0	1	frameshift_variant|COL6A5|p.Leu986fs	0	0	0	0	0	0	0
chr2	40750741	C	T	CEP70	0.000564972	0	1	splice_donor_variant&intron_variant|CEP70|	0	0	0	0	0	0	0
chr2	42848691	AG	A	TRIM42	0.000564972	0	1	frameshift_variant|TRIM42|p.Arg377fs	0	0	0	0	0	0	0
chr2	43947502	CG	C	GRK7	0.000564972	0	1	frameshift_variant|GRK7|p.Val495fs	0	0	0	0	0	0	0
chr2	44650671	CTA	C	ATR	0.000564972	0	1	splice_acceptor_variant&splice_region_variant&intron_variant|ATR|	0	1	0	0	1	0	2
chr2	48724162	G	A	PLSCR5	0.000564972	0	1	stop_gained|PLSCR5|p.Gln7*	0	0	0	0	0	0	0
chr2	51311411	GA	G	CP	0.000564972	0	1	frameshift_variant|CP|p.Ser661fs	0	1	1	0	0	0	2
chr2	52840424	GT	G	ENSMMUG00000044974	0.000564972	0	1	frameshift_variant|ENSMMUG00000044974|p.Thr282fs	0	0	0	0	0	0	0
chr2	60921601	T	C	LXN	0.000564972	0	1	splice_acceptor_variant&intron_variant|LXN|	0	0	0	0	0	0	0
chr2	88455605	G	T	MCF2L2	0.000564972	0	1	stop_gained|MCF2L2|p.Ser1042*	0	0	0	0	0	0	0
chr2	88560363	TC	T	MCF2L2	0.000564972	0	1	frameshift_variant|MCF2L2|p.Asn578fs	0	0	0	0	0	0	0
chr2	89297222	A	C	ABCC5	0.000564972	0	1	splice_donor_variant&intron_variant|ABCC5|	0	0	1	0	0	0	1
chr2	89396589	CT	C	HTR3E	0.000564972	0	1	frameshift_variant|HTR3E|p.Tyr165fs	0	0	1	0	0	0	1
chr2	89527755	GC	G	VWA5B2	0.000564972	0	1	frameshift_variant|VWA5B2|p.Ala126fs	0	0	0	0	0	0	0
chr2	91604725	G	A	DGKG	0.000564972	0	1	stop_gained|DGKG|p.Gln463*	0	0	1	0	0	0	1
chr2	91989880	A	C	FETUB	0.000564972	0	1	splice_acceptor_variant&intron_variant|FETUB|	0	0	0	0	0	0	0
chr2	93497246	CCAAA	C	DLEC1	0.000564972	0	1	frameshift_variant|DLEC1|p.Gln283fs	0	0	0	0	0	0	0
chr2	93696401	C	T	SLC22A13	0.000564972	0	1	stop_gained|SLC22A13|p.Gln141*	0	0	0	0	0	0	0
chr2	94008971	GAAGA	G	SCN5A	0.000564972	0	1	frameshift_variant|SCN5A|p.Phe1460fs	1	1	1	1	0	0	4
chr2	99513079	GCCACGCTT	G	ANO10	0.000564972	0	1	frameshift_variant|ANO10|p.Lys283fs	0	1	0	0	0	0	1
chr2	104354641	C	T	SPINK8	0.000564972	0	1	stop_gained|SPINK8|p.Trp50*	0	0	0	0	0	0	0
chr2	104421469	TCA	T	FBXW12	0.000564972	0	1	frameshift_variant|FBXW12|p.Thr246fs	0	0	0	0	0	0	0
chr2	104692386	CTG	C	SLC26A6	0.000564972	0	1	splice_acceptor_variant&splice_region_variant&intron_variant|SLC26A6|	0	0	0	0	0	0	0
chr2	105064356	C	CGA	P4HTM	0.000564972	0	1	frameshift_variant|P4HTM|p.Asp34fs	0	0	1	0	0	0	1
chr2	105215979	G	A	LAMB2	0.000564972	0	1	stop_gained|LAMB2|p.Arg19*	0	1	0	0	0	0	1
chr2	105790288	G	A	APEH	0.000564972	0	1	stop_gained|APEH|p.Trp251*	0	0	0	0	0	0	0
chr2	105801174	G	C	MST1	0.000564972	0	1	stop_gained|MST1|p.Tyr158*	0	0	0	0	0	0	0
chr2	105938099	T	C	UBA7	0.000564972	0	1	splice_acceptor_variant&intron_variant|UBA7|	0	0	0	0	0	0	0
chr2	105938406	TC	T	UBA7	0.000564972	0	1	frameshift_variant|UBA7|p.Ala198fs	0	0	0	0	0	0	0
chr2	106024404	C	T	MST1R	0.000564972	0	1	splice_donor_variant&intron_variant|MST1R|	0	0	1	1	0	0	2
chr2	106380833	G	GA	GNAI2	0.000564972	0	1	splice_donor_variant&intron_variant|GNAI2|	0	0	0	1	0	0	1
chr2	108545892	CTCTT	C	DNAH1	0.000564972	0	1	frameshift_variant|DNAH1|p.Phe3518fs	0	0	0	0	0	0	0
chr2	108576603	T	C	PHF7	0.000564972	0	1	splice_donor_variant&intron_variant|PHF7|	0	0	0	0	0	0	0
chr2	108964973	C	CT	ITIH1	0.000564972	0	1	frameshift_variant&stop_gained|ITIH1|p.Asn442fs	0	0	1	0	0	0	1
chr2	109001752	CT	C	ITIH4	0.000564972	0	1	frameshift_variant|ITIH4|p.Glu600fs	0	0	1	0	0	0	1
chr2	112740044	AAG	A	CCDC66	0.000564972	0	1	frameshift_variant|CCDC66|p.Glu288fs	0	0	0	0	0	0	0
chr2	112783519	AAGGT	A	CCDC66	0.000564972	0	1	frameshift_variant&splice_donor_variant&splice_region_variant&intron_variant|CCDC66|p.Asp885fs	0	0	0	0	0	0	0
chr2	113404622	G	A	APPL1	0.000564972	0	1	splice_donor_variant&intron_variant|APPL1|	0	0	0	0	0	0	0
chr2	113405881	A	AT	APPL1	0.000564972	0	1	splice_donor_variant&intron_variant|APPL1|	0	0	0	0	0	0	0
chr2	115012165	T	C	CFAP20DC	0.000564972	0	1	splice_acceptor_variant&intron_variant|CFAP20DC|	0	0	0	0	0	0	0
chr2	118704708	CTG	C	ENSMMUG00000031902	0.000564972	0	1	splice_acceptor_variant&splice_region_variant&intron_variant|ENSMMUG00000031902|	0	0	0	0	0	0	0
chr2	134424759	GC	G	IL5RA	0.000564972	0	1	frameshift_variant|IL5RA|p.Ala114fs	0	0	1	0	0	0	1
chr2	140079809	C	CCGTTAAGG	CAV3	0.000564972	0	1	frameshift_variant|CAV3|p.Glu92fs	0	0	0	0	0	0	0
chr2	141103181	C	T	CAMK1	0.000564972	0	1	splice_donor_variant&intron_variant|CAMK1|	0	0	1	0	0	0	1
chr2	143943594	AAGTG	A	MKRN2	0.000564972	0	1	frameshift_variant&splice_donor_variant&splice_region_variant&intron_variant|MKRN2|p.Asn113fs	0	0	0	0	0	0	0
chr2	143948342	T	TTAAG	MKRN2	0.000564972	0	1	frameshift_variant|MKRN2|p.Asn282fs	0	0	0	0	0	0	0
chr2	145523484	T	C	XPC	0.000564972	0	1	splice_acceptor_variant&intron_variant|XPC|	0	1	0	0	0	0	1
chr2	148554174	AG	A	KBTBD12	0.000564972	0	1	frameshift_variant|KBTBD12|p.Pro531fs	0	0	0	0	0	0	0
chr2	149920210	G	T	TXNRD3	0.000564972	0	1	stop_gained|TXNRD3|p.Gly593*	0	0	0	0	0	0	0
chr2	153695838	CTT	C	PARP15	0.000564972	0	1	frameshift_variant|PARP15|p.Asp494fs	0	0	1	0	0	0	1
chr2	153760823	C	T	PARP9	0.000564972	0	1	stop_gained|PARP9|p.Arg28*	0	0	0	0	0	0	0
chr2	154300539	T	TTTTTG	ILDR1	0.000564972	0	1	frameshift_variant|ILDR1|p.Tyr73fs	0	0	0	0	0	0	0
chr2	154300540	A	AGCTCTCGAG	ILDR1	0.000564972	0	1	stop_gained&disruptive_inframe_insertion|ILDR1|p.Tyr73delinsTerLeuSerSer	0	0	0	0	0	0	0
chr2	154715109	CCA	C	FBXO40	0.000564972	0	1	frameshift_variant|FBXO40|p.His211fs	0	0	0	0	0	0	0
chr2	154796347	G	A	POLQ	0.000564972	0	1	splice_donor_variant&intron_variant|POLQ|	0	1	0	0	0	0	1
chr2	162189317	G	A	QTRT2	0.000564972	0	1	stop_gained|QTRT2|p.Arg207*	0	0	0	0	0	0	0
chr2	163599037	A	AGAAG	SLC35A5	0.000564972	0	1	frameshift_variant|SLC35A5|p.Phe186fs	0	0	0	0	0	0	0
chr2	167650284	G	C	CIP2A	0.000564972	0	1	splice_acceptor_variant&intron_variant|CIP2A|	0	0	0	0	0	0	0
chr2	167827290	C	T	MYH15	0.000564972	0	1	stop_gained|MYH15|p.Gln1749*	0	0	0	0	0	0	0
chr2	168812608	TTC	T	CCDC54	0.000564972	0	1	frameshift_variant|CCDC54|p.Lys197fs	0	0	0	0	0	0	0
chr2	175763878	AC	A	NIT2	0.000564972	0	1	frameshift_variant|NIT2|p.Gly67fs	0	0	0	0	0	0	0
chr2	175925819	C	T	CMSS1	0.000564972	0	1	splice_acceptor_variant&intron_variant|CMSS1|	0	0	0	0	0	0	0
chr2	181785008	CT	C	ENSMMUG00000057255	0.000564972	0	1	frameshift_variant|ENSMMUG00000057255|p.Glu50fs	0	0	0	0	0	0	0
chr2	181828471	AC	A	STX19	0.000564972	0	1	frameshift_variant|STX19|p.Thr200fs	0	0	0	0	0	0	0
chr3	1540952	AG	A	ADARB1	0.000564972	0	1	frameshift_variant|ADARB1|p.Ser231fs	0	0	0	1	0	0	1
chr3	2343114	C	T	TRPM2	0.000564972	0	1	stop_gained|TRPM2|p.Trp478*	0	0	0	0	0	0	0
chr3	3304774	A	G	SIK1	0.000564972	0	1	splice_acceptor_variant&intron_variant|SIK1|	0	0	1	0	0	0	1
chr3	3768819	ATAAAG	A	ENSMMUG00000044879	0.000564972	0	1	frameshift_variant|ENSMMUG00000044879|p.Val89fs	0	0	0	0	0	0	0
chr3	4328867	C	T	TFF2	0.000564972	0	1	stop_gained|TFF2|p.Arg4*	0	0	1	0	0	0	1
chr3	5199422	C	A	MX1	0.000564972	0	1	splice_acceptor_variant&intron_variant|MX1|	0	0	0	0	0	0	0
chr3	13023101	A	AG	GART	0.000564972	0	1	frameshift_variant|GART|p.Glu330fs	0	0	1	0	1	0	2
chr3	13765560	C	T	PAXBP1	0.000564972	0	1	stop_gained|PAXBP1|p.Arg420*	0	0	0	0	0	0	0
chr3	34063594	G	A	CYP2W1	0.000564972	0	1	stop_gained|CYP2W1|p.Trp173*	0	0	0	0	0	0	0
chr3	34540435	G	A	INTS1	0.000564972	0	1	stop_gained|INTS1|p.Arg1678*	0	0	0	1	1	0	2
chr3	34560451	G	A	INTS1	0.000564972	0	1	stop_gained|INTS1|p.Gln527*	0	0	0	1	1	0	2
chr3	36038611	A	C	CARD11	0.000564972	0	1	splice_donor_variant&intron_variant|CARD11|	0	0	0	0	0	0	0
chr3	38456949	G	GC	TNRC18	0.000564972	0	1	frameshift_variant|TNRC18|p.Asp1733fs	0	0	0	0	0	0	0
chr3	40442948	CTCA	C	BAIAP2L1	0.000564972	0	1	stop_gained&disruptive_inframe_deletion|BAIAP2L1|p.Tyr69_Glu70delinsTer	0	0	0	0	0	0	0
chr3	41292598	C	CA	KPNA7	0.000564972	0	1	frameshift_variant|KPNA7|p.Arg286fs	0	0	0	0	0	0	0
chr3	42034114	C	T	CYP3A43	0.000564972	0	1	stop_gained|CYP3A43|p.Arg268*	0	0	0	0	0	0	0
chr3	42479158	C	A	ZCWPW1	0.000564972	0	1	stop_gained|ZCWPW1|p.Gly365*	0	0	0	0	0	0	0
chr3	43035225	CAG	C	MUC3A	0.000564972	0	1	frameshift_variant|MUC3A|p.Ser551fs	0	0	0	0	0	0	0
chr3	43119100	CG	C	ENSMMUG00000052734	0.000564972	0	1	frameshift_variant|ENSMMUG00000052734|p.Arg1149fs	0	0	0	0	0	0	0
chr3	43325413	G	GA	MOGAT3	0.000564972	0	1	frameshift_variant|MOGAT3|p.Leu322fs	0	0	0	0	0	0	0
chr3	53007319	C	CA	ENSMMUG00000030374	0.000564972	0	1	frameshift_variant|ENSMMUG00000030374|p.Ile123fs	0	0	0	0	0	0	0
chr3	53898921	G	GC	ENSMMUG00000021236	0.000564972	0	1	frameshift_variant|ENSMMUG00000021236|p.Glu19fs	0	0	0	0	0	0	0
chr3	59096652	CG	C	SUMF2	0.000564972	0	1	frameshift_variant|SUMF2|p.His39fs	0	0	0	0	0	0	0
chr3	66863274	C	T	ABCA13	0.000564972	0	1	splice_donor_variant&intron_variant|ABCA13|	0	0	0	0	0	0	0
chr3	67052612	G	A	ABCA13	0.000564972	0	1	stop_gained|ABCA13|p.Gln2972*	0	0	0	0	0	0	0
chr3	67104050	A	T	ABCA13	0.000564972	0	1	stop_gained|ABCA13|p.Leu543*	0	0	0	0	0	0	0
chr3	80293222	G	A	NPSR1	0.000564972	0	1	stop_gained|NPSR1|p.Arg109*	0	0	1	0	0	0	1
chr3	82801649	C	T	ENSMMUG00000060356	0.000564972	0	1	stop_gained|ENSMMUG00000060356|p.Gln148*	0	0	0	0	0	0	0
chr3	83477104	CT	C	ITPRID1	0.000564972	0	1	frameshift_variant|ITPRID1|p.Ala959fs	0	0	0	0	0	0	0
chr3	83478563	G	T	ITPRID1	0.000564972	0	1	stop_gained|ITPRID1|p.Cys885*	0	0	0	0	0	0	0
chr3	102735991	C	T	VWDE	0.000564972	0	1	stop_gained|VWDE|p.Gln811*	0	0	0	0	0	0	0
chr3	109097522	G	GAT	DLX5	0.000564972	0	1	frameshift_variant&start_lost|DLX5|p.Met1fs	0	0	0	1	0	0	1
chr3	110153965	C	A	DYNC1I1	0.000564972	0	1	stop_gained|DYNC1I1|p.Glu210*	0	0	0	0	0	0	0
chr3	111712214	A	G	COL1A2	0.000564972	0	1	splice_donor_variant&intron_variant|COL1A2|	1	0	1	1	0	0	3
chr3	118759236	G	A	CROT	0.000564972	0	1	stop_gained|CROT|p.Arg197*	0	0	1	0	0	0	1
chr3	120841841	G	A	ENSMMUG00000040343	0.000564972	0	1	stop_gained|ENSMMUG00000040343|p.Gln184*	0	0	0	0	0	0	0
chr3	120842088	G	GTCTTC	ENSMMUG00000040343	0.000564972	0	1	frameshift_variant|ENSMMUG00000040343|p.Asp101fs	0	0	0	0	0	0	0
chr3	129280698	G	A	FBXL13	0.000564972	0	1	stop_gained|FBXL13|p.Arg468*	0	0	0	0	0	0	0
chr3	134357876	T	G	LAMB4	0.000564972	0	1	splice_acceptor_variant&intron_variant|LAMB4|	0	0	0	0	0	0	0
chr3	148784170	CAT	C	CADPS2	0.000564972	0	1	frameshift_variant|CADPS2|p.Met1084fs	0	0	1	0	0	0	1
chr3	149922360	AT	A	IQUB	0.000564972	0	1	frameshift_variant|IQUB|p.Glu403fs	0	0	0	0	0	0	0
chr3	150285873	TG	T	HYAL4	0.000564972	0	1	frameshift_variant|HYAL4|p.Gly216fs	0	0	0	0	0	0	0
chr3	155134545	G	A	KCP	0.000564972	0	1	stop_gained|KCP|p.Arg1013*	0	0	0	0	0	0	0
chr3	156562392	AT	A	CPA2	0.000564972	0	1	frameshift_variant|CPA2|p.Asn42fs	0	0	0	0	0	0	0
chr3	156568690	C	T	CPA2	0.000564972	0	1	stop_gained|CPA2|p.Arg183*	0	0	0	0	0	0	0
chr3	163900183	C	T	DGKI	0.000564972	0	1	splice_donor_variant&intron_variant|DGKI|	0	0	0	0	0	0	0
chr3	165047756	G	A	SVOPL	0.000564972	0	1	stop_gained|SVOPL|p.Gln331*	0	0	0	0	0	0	0
chr3	165142786	T	A	ATP6V0A4	0.000564972	0	1	splice_acceptor_variant&intron_variant|ATP6V0A4|	0	1	0	0	0	0	1
chr3	165900705	G	A	KLRG2	0.000564972	0	1	stop_gained&splice_region_variant|KLRG2|p.Gln332*	0	0	0	0	0	0	0
chr3	166550125	C	G	KDM7A	0.000564972	0	1	splice_donor_variant&intron_variant|KDM7A|	0	0	0	0	0	0	0
chr3	168157875	TA	T	TAS2R3	0.000564972	0	1	frameshift_variant|TAS2R3|p.Lys266fs	0	0	0	0	0	0	0
chr3	168359570	GA	G	MGAM	0.000564972	0	1	frameshift_variant&splice_region_variant|MGAM|p.Asn287fs	0	0	1	0	0	0	1
chr3	174963316	G	A	C7orf33	0.000564972	0	1	splice_donor_variant&intron_variant|C7orf33|	0	0	0	0	0	0	0
chr3	175387223	A	ACTTC	PDIA4	0.000564972	0	1	frameshift_variant|PDIA4|p.Ser382fs	0	0	0	0	0	0	0
chr3	177013254	GGTAA	G	NOS3	0.000564972	0	1	splice_donor_variant&splice_region_variant&intron_variant|NOS3|	0	0	1	1	0	0	2
chr3	177024707	A	AT	ATG9B	0.000564972	0	1	frameshift_variant|ATG9B|p.Gly252fs	0	0	0	0	0	0	0
chr3	177054173	C	T	ASIC3	0.000564972	0	1	stop_gained|ASIC3|p.Arg463*	0	0	1	0	0	0	1
chr3	177066894	CG	C	SLC4A2	0.000564972	0	1	frameshift_variant|SLC4A2|p.Lys165fs	0	0	0	1	0	0	1
chr3	177119687	A	C	ENSMMUG00000063645	0.000564972	0	1	splice_acceptor_variant&intron_variant|ENSMMUG00000063645|	0	0	0	0	0	0	0
chr3	182653742	C	T	RNF32	0.000564972	0	1	stop_gained|RNF32|p.Arg32*	0	0	0	0	0	0	0
chr3	182742691	G	A	LMBR1	0.000564972	0	1	stop_gained|LMBR1|p.Arg370*	1	0	0	0	0	0	1
chr3	182971861	C	T	NOM1	0.000564972	0	1	stop_gained|NOM1|p.Arg785*	0	0	0	0	0	0	0
chr4	861368	T	TA	ERMARD	0.000564972	0	1	frameshift_variant&splice_region_variant|ERMARD|p.Phe219fs	0	0	0	0	0	0	0
chr4	917021	A	C	C4H6orf120	0.000564972	0	1	splice_donor_variant&intron_variant|C4H6orf120|	0	0	0	0	0	0	0
chr4	2310148	G	GC	DACT2	0.000564972	0	1	frameshift_variant|DACT2|p.Val260fs	0	0	0	0	0	0	0
chr4	2310157	G	GCAAGCTCC	DACT2	0.000564972	0	1	frameshift_variant|DACT2|p.Gly265fs	0	0	0	0	0	0	0
chr4	2595090	TG	T	FRMD1	0.000564972	0	1	frameshift_variant|FRMD1|p.Gln144fs	0	0	0	0	0	0	0
chr4	10779134	AAG	A	ENSMMUG00000052876	0.000564972	0	1	frameshift_variant|ENSMMUG00000052876|p.Asn24fs	0	0	0	0	0	0	0
chr4	12839890	T	TAAAAA	CEP57L1	0.000564972	0	1	frameshift_variant&stop_gained|CEP57L1|p.Ser433fs	0	0	0	0	0	0	0
chr4	13111190	C	CG	MICAL1	0.000564972	0	1	frameshift_variant|MICAL1|p.Arg838fs	0	0	0	0	0	0	0
chr4	20330754	CT	C	FAM162B	0.000564972	0	1	frameshift_variant|FAM162B|p.Ala105fs	0	0	0	0	0	0	0
chr4	24787991	AG	A	TBC1D32	0.000564972	0	1	frameshift_variant|TBC1D32|p.Leu468fs	0	0	0	0	0	0	0
chr4	31168664	G	A	C4H6orf58	0.000564972	0	1	splice_acceptor_variant&intron_variant|C4H6orf58|	0	0	0	0	0	0	0
chr4	33049586	AT	A	LAMA2	0.000564972	0	1	frameshift_variant|LAMA2|p.Tyr2586fs	0	1	0	1	0	0	2
chr4	33783940	G	T	SAMD3	0.000564972	0	1	stop_gained|SAMD3|p.Tyr63*	0	0	0	0	0	0	0
chr4	40191980	C	T	MAP3K5	0.000564972	0	1	splice_donor_variant&intron_variant|MAP3K5|	0	0	0	0	0	0	0
chr4	42402633	TC	T	CCDC28A	0.000564972	0	1	frameshift_variant|CCDC28A|p.Asn90fs	0	0	0	0	0	0	0
chr4	55904725	GA	G	ENSMMUG00000029465	0.000564972	0	1	frameshift_variant|ENSMMUG00000029465|p.Glu103fs	0	0	0	0	0	0	0
chr4	55928204	AT	A	ENSMMUG00000063631	0.000564972	0	1	frameshift_variant|ENSMMUG00000063631|p.Asn230fs	0	0	0	0	0	0	0
chr4	56174922	CAA	C	ENSMMUG00000029466	0.000564972	0	1	frameshift_variant|ENSMMUG00000029466|p.Cys90fs	0	0	0	0	0	0	0
chr4	57722919	GA	G	CCDC170	0.000564972	0	1	frameshift_variant|CCDC170|p.Asn123fs	0	0	0	0	0	0	0
chr4	60370458	A	ATGTT	OPRM1	0.000564972	0	1	frameshift_variant|OPRM1|p.Met207fs	0	0	1	0	0	0	1
chr4	65085499	A	G	SYTL3	0.000564972	0	1	splice_acceptor_variant&intron_variant|SYTL3|	0	0	0	0	0	0	0
chr4	73374194	G	GA	MCHR2	0.000564972	0	1	frameshift_variant|MCHR2|p.Thr66fs	0	0	0	0	0	0	0
chr4	85832252	T	TTTAG	SLC35A1	0.000564972	0	1	splice_acceptor_variant&intron_variant|SLC35A1|	0	0	0	1	0	0	1
chr4	96986008	G	T	IMPG1	0.000564972	0	1	splice_donor_variant&intron_variant|IMPG1|	0	0	0	0	0	0	0
chr4	104433780	CA	C	ENSMMUG00000001881	0.000564972	0	1	frameshift_variant|ENSMMUG00000001881|p.Phe26fs	0	0	0	0	0	0	0
chr4	116613403	A	T	GSTA4	0.000564972	0	1	stop_gained|GSTA4|p.Arg20*	0	0	1	0	0	0	1
chr4	117671353	A	G	PKHD1	0.000564972	0	1	splice_acceptor_variant&intron_variant|PKHD1|	0	1	0	1	0	0	2
chr4	119625563	ACAAAATGC	A	CRISP1	0.000564972	0	1	frameshift_variant|CRISP1|p.Ala75fs	0	0	0	0	0	0	0
chr4	121700385	C	T	ADGRF4	0.000564972	0	1	splice_acceptor_variant&intron_variant|ADGRF4|	0	0	0	0	0	0	0
chr4	121704082	ACT	A	ADGRF4	0.000564972	0	1	frameshift_variant|ADGRF4|p.Leu936fs	0	0	0	0	0	0	0
chr4	121707493	C	CT	ADGRF4	0.000564972	0	1	frameshift_variant|ADGRF4|p.Trp707fs	0	0	0	0	0	0	0
chr4	122693954	G	A	PLA2G7	0.000564972	0	1	splice_acceptor_variant&intron_variant|PLA2G7|	1	0	1	0	0	0	2
chr4	123233383	C	G	ENPP4	0.000564972	0	1	splice_acceptor_variant&intron_variant|ENPP4|	0	0	0	0	0	0	0
chr4	123236457	AG	A	ENPP4	0.000564972	0	1	frameshift_variant|ENPP4|p.Tyr150fs	0	0	0	0	0	0	0
chr4	125882712	G	T	ABCC10	0.000564972	0	1	stop_gained|ABCC10|p.Tyr1258*	0	0	0	0	0	0	0
chr4	126035999	A	G	SLC22A7	0.000564972	0	1	splice_donor_variant&intron_variant|SLC22A7|	0	0	1	0	0	0	1
chr4	128052141	G	A	NCR2	0.000564972	0	1	stop_gained|NCR2|p.Arg22*	0	0	0	0	0	0	0
chr4	133151945	GCCAC	G	BNIP5	0.000564972	0	1	frameshift_variant|BNIP5|p.Thr575fs	0	0	0	0	0	0	0
chr4	137349906	G	A	PPT2	0.000564972	0	1	stop_gained|PPT2|p.Gln155*	0	0	0	0	0	0	0
chr4	137462727	C	A	CYP21A2	0.000564972	0	1	splice_acceptor_variant&intron_variant|CYP21A2|	0	1	1	1	0	0	3
chr4	137481488	A	C	ENSMMUG00000049499	0.000564972	0	1	splice_donor_variant&intron_variant|ENSMMUG00000049499|	0	0	0	0	0	0	0
chr4	137502945	G	A	ENSMMUG00000059791	0.000564972	0	1	stop_gained|ENSMMUG00000059791|p.Arg915*	0	0	0	0	0	0	0
chr4	137743018	TGTTGG	T	MSH5	0.000564972	0	1	frameshift_variant|MSH5|p.Thr677fs	0	0	0	0	0	0	0
chr4	139625785	CTGAT	C	ENSMMUG00000060527	0.000564972	0	1	frameshift_variant|ENSMMUG00000060527|p.Asn90fs	0	0	0	0	0	0	0
chr4	139734355	GTC	G	TRIM15	0.000564972	0	1	frameshift_variant|TRIM15|p.Glu67fs	0	0	0	0	0	0	0
chr4	141919462	T	C	ZSCAN31	0.000564972	0	1	splice_donor_variant&intron_variant|ZSCAN31|	0	0	0	0	0	0	0
chr4	142154081	G	A	ZSCAN16	0.000564972	0	1	stop_gained|ZSCAN16|p.Gln42*	0	0	0	0	0	0	0
chr4	142961689	G	A	PRSS16	0.000564972	0	1	stop_gained|PRSS16|p.Gln403*	0	0	0	0	0	0	0
chr4	143963749	C	CT	ENSMMUG00000054127	0.000564972	0	1	frameshift_variant&stop_gained|ENSMMUG00000054127|p.Lys78fs	0	0	0	0	0	0	0
chr4	149210888	A	G	CDKAL1	0.000564972	0	1	splice_donor_variant&intron_variant|CDKAL1|	0	0	0	0	0	0	0
chr4	152109720	C	T	KIF13A	0.000564972	0	1	stop_gained|KIF13A|p.Gln141*	0	0	0	0	0	0	0
chr4	156380492	G	A	NOL7	0.000564972	0	1	stop_gained|NOL7|p.Gln181*	0	0	0	0	0	0	0
chr4	165981789	T	G	ECI2	0.000564972	0	1	stop_gained|ECI2|p.Tyr109*	0	0	1	0	0	0	1
chr4	165981936	G	GA	ECI2	0.000564972	0	1	frameshift_variant|ECI2|p.Asn160fs	0	0	1	0	0	0	1
chr5	5420044	G	T	SORCS2	0.000564972	0	1	stop_gained|SORCS2|p.Ser187*	0	0	0	0	0	0	0
chr5	6325756	C	CT	ENSMMUG00000021695	0.000564972	0	1	frameshift_variant|ENSMMUG00000021695|p.Arg54fs	0	0	0	0	0	0	0
chr5	6325760	TC	T	ENSMMUG00000021695	0.000564972	0	1	frameshift_variant|ENSMMUG00000021695|p.Asn53fs	0	0	0	0	0	0	0
chr5	6359071	C	T	MAN2B2	0.000564972	0	1	splice_donor_variant&intron_variant|MAN2B2|	0	0	0	0	0	0	0
chr5	6999885	C	T	ENSMMUG00000023152	0.000564972	0	1	stop_gained|ENSMMUG00000023152|p.Gln94*	0	0	0	0	0	0	0
chr5	8657745	GA	G	LYAR	0.000564972	0	1	frameshift_variant|LYAR|p.Asn27fs	0	0	0	0	0	0	0
chr5	8668715	G	GT	LYAR	0.000564972	0	1	frameshift_variant&stop_gained&splice_region_variant|LYAR|p.Glu144fs	0	0	0	0	0	0	0
chr5	8669120	T	G	LYAR	0.000564972	0	1	splice_donor_variant&intron_variant|LYAR|	0	0	0	0	0	0	0
chr5	9027137	TG	T	SLC2A9	0.000564972	0	1	frameshift_variant|SLC2A9|p.Ile156fs	0	0	0	1	0	0	1
chr5	9569768	G	A	CLNK	0.000564972	0	1	stop_gained|CLNK|p.Arg350*	0	0	0	0	0	0	0
chr5	14561048	G	A	CC2D2A	0.000564972	0	1	splice_acceptor_variant&intron_variant|CC2D2A|	0	1	0	0	0	0	1
chr5	19681807	CAG	C	PACRGL	0.000564972	0	1	frameshift_variant|PACRGL|p.Arg15fs	0	0	0	0	0	0	0
chr5	22764631	G	A	PPARGC1A	0.000564972	0	1	stop_gained|PPARGC1A|p.Arg580*	0	0	0	1	0	0	1
chr5	23485023	C	A	DHX15	0.000564972	0	1	stop_gained|DHX15|p.Glu541*	0	0	0	0	1	0	1
chr5	50192474	C	CA	ABRAXAS1	0.000564972	0	1	splice_acceptor_variant&intron_variant|ABRAXAS1|	0	0	0	0	0	0	0
chr5	50208893	CTG	C	HELQ	0.000564972	0	1	frameshift_variant|HELQ|p.Val231fs	0	0	0	0	0	0	0
chr5	54521226	GC	G	ENSMMUG00000007366	0.000564972	0	1	frameshift_variant|ENSMMUG00000007366|p.Glu195fs	0	0	0	0	0	0	0
chr5	54522053	TCA	T	ENSMMUG00000007366	0.000564972	0	1	frameshift_variant|ENSMMUG00000007366|p.Thr440fs	0	0	0	0	0	0	0
chr5	57685693	G	T	CXCL11	0.000564972	0	1	stop_gained|CXCL11|p.Glu68*	0	0	0	0	0	0	0
chr5	57850237	G	A	PPEF2	0.000564972	0	1	splice_donor_variant&intron_variant|PPEF2|	0	0	0	0	0	0	0
chr5	64124637	C	A	UGT2A1	0.000564972	0	1	stop_gained|UGT2A1|p.Ser266*	0	0	0	0	0	0	0
chr5	64171088	C	T	UGT2A1	0.000564972	0	1	stop_gained|UGT2A1|p.Arg623*	0	0	0	0	0	0	0
chr5	64374889	C	T	ENSMMUG00000014773	0.000564972	0	1	splice_acceptor_variant&intron_variant|ENSMMUG00000014773|	0	0	0	0	0	0	0
chr5	65100748	C	A	TMPRSS11E	0.000564972	0	1	splice_acceptor_variant&intron_variant|TMPRSS11E|	0	0	0	0	0	0	0
chr5	76608884	G	GT	POLR2B	0.000564972	0	1	frameshift_variant|POLR2B|p.Phe1032fs	0	0	0	0	1	0	1
chr5	76608885	A	ATAGG	POLR2B	0.000564972	0	1	frameshift_variant|POLR2B|p.Phe1032fs	0	0	0	0	1	0	1
chr5	77639893	G	A	CEP135	0.000564972	0	1	stop_gained|CEP135|p.Gln215*	0	0	0	0	0	0	0
chr5	78025213	G	A	NMU	0.000564972	0	1	splice_acceptor_variant&intron_variant|NMU|	0	0	0	0	0	0	0
chr5	80144526	C	T	LNX1	0.000564972	0	1	stop_gained|LNX1|p.Arg419*	0	0	0	0	0	0	0
chr5	81633212	G	T	LRRC66	0.000564972	0	1	stop_gained|LRRC66|p.Glu164*	0	0	0	0	0	0	0
chr5	81658941	T	TC	LRRC66	0.000564972	0	1	frameshift_variant|LRRC66|p.His298fs	0	0	0	0	0	0	0
chr5	96299993	G	A	STPG2	0.000564972	0	1	stop_gained|STPG2|p.Arg312*	0	0	0	0	0	0	0
chr5	97427240	CT	C	ADH4	0.000564972	0	1	frameshift_variant|ADH4|p.Ala258fs	0	0	1	0	0	0	1
chr5	97933374	A	G	TRMT10A	0.000564972	0	1	splice_donor_variant&intron_variant|TRMT10A|	0	0	0	0	0	0	0
chr5	101460105	C	G	SLC9B2	0.000564972	0	1	splice_donor_variant&intron_variant|SLC9B2|	0	0	0	0	0	0	0
chr5	102056846	G	A	TACR3	0.000564972	0	1	stop_gained|TACR3|p.Gln236*	1	0	1	0	0	0	2
chr5	104217176	T	C	GSTCD	0.000564972	0	1	splice_donor_variant&intron_variant|GSTCD|	0	0	0	0	0	0	0
chr5	104675033	TAGAC	T	TBCK	0.000564972	0	1	frameshift_variant|TBCK|p.Ser443fs	0	0	0	0	0	0	0
chr5	108331313	G	T	EGF	0.000564972	0	1	stop_gained|EGF|p.Glu699*	0	1	1	0	0	0	2
chr5	110301266	GTC	G	ENSMMUG00000040183	0.000564972	0	1	frameshift_variant|ENSMMUG00000040183|p.Asp249fs	0	0	0	0	0	0	0
chr5	117318541	CTAAGT	C	USP53	0.000564972	0	1	frameshift_variant|USP53|p.Leu432fs	0	0	0	0	0	0	0
chr5	119185767	TTC	T	QRFPR	0.000564972	0	1	frameshift_variant|QRFPR|p.Glu132fs	0	0	0	0	0	0	0
chr5	125684822	A	G	MFSD8	0.000564972	0	1	splice_donor_variant&intron_variant|MFSD8|	0	1	0	0	0	0	1
chr5	141538194	C	CA	FREM3	0.000564972	0	1	splice_acceptor_variant&intron_variant|FREM3|	0	0	0	0	0	0	0
chr5	141542606	G	A	FREM3	0.000564972	0	1	stop_gained|FREM3|p.Arg1008*	0	0	0	0	0	0	0
chr5	148921671	CT	C	PRSS48	0.000564972	0	1	frameshift_variant|PRSS48|p.Phe206fs	0	0	0	0	0	0	0
chr5	152956087	TTC	T	MAP9	0.000564972	0	1	frameshift_variant|MAP9|p.Glu536fs	0	0	0	0	0	0	0
chr5	154407650	GC	G	PDGFC	0.000564972	0	1	splice_acceptor_variant&intron_variant|PDGFC|	0	0	0	1	0	0	1
chr5	164117800	C	G	SPOCK3	0.000564972	0	1	splice_acceptor_variant&intron_variant|SPOCK3|	0	0	0	0	0	0	0
chr5	165622428	ATTTT	A	DDX60	0.000564972	0	1	frameshift_variant|DDX60|p.Glu946fs	0	0	0	0	0	0	0
chr5	165622432	T	TGAAG	DDX60	0.000564972	0	1	frameshift_variant|DDX60|p.Glu946fs	0	0	0	0	0	0	0
chr5	165741875	TGA	T	DDX60L	0.000564972	0	1	frameshift_variant|DDX60L|p.Val1307fs	0	0	0	0	0	0	0
chr5	165744803	T	A	DDX60L	0.000564972	0	1	stop_gained|DDX60L|p.Lys1177*	0	0	0	0	0	0	0
chr5	165778279	GA	G	DDX60L	0.000564972	0	1	frameshift_variant|DDX60L|p.Ser599fs	0	0	0	0	0	0	0
chr5	165816273	C	CT	DDX60L	0.000564972	0	1	splice_acceptor_variant&intron_variant|DDX60L|	0	0	0	0	0	0	0
chr5	166025511	C	A	PALLD	0.000564972	0	1	stop_gained|PALLD|p.Ser367*	0	0	0	1	0	0	1
chr5	166728262	A	G	NEK1	0.000564972	0	1	splice_donor_variant&intron_variant|NEK1|	0	1	1	1	0	0	3
chr5	167057586	TG	T	HPF1	0.000564972	0	1	frameshift_variant|HPF1|p.Thr98fs	0	0	0	0	0	0	0
chr5	181964776	GA	G	PRIMPOL	0.000564972	0	1	frameshift_variant|PRIMPOL|p.Asn104fs	0	0	0	0	0	0	0
chr5	182789421	C	CTA	PDLIM3	0.000564972	0	1	splice_acceptor_variant&intron_variant|PDLIM3|	0	0	0	1	0	0	1
chr6	171685	G	GC	LRRC14B	0.000564972	0	1	frameshift_variant|LRRC14B|p.Ser233fs	0	0	0	0	0	0	0
chr6	1195144	CAA	C	SLC6A18	0.000564972	0	1	frameshift_variant|SLC6A18|p.Ser277fs	0	0	0	0	0	0	0
chr6	2701975	CG	C	IRX2	0.000564972	0	1	frameshift_variant|IRX2|p.Arg444fs	0	0	0	0	0	0	0
chr6	6289629	G	A	MED10	0.000564972	0	1	stop_gained|MED10|p.Arg75*	0	0	0	0	0	0	0
chr6	14112044	C	CT	DNAH5	0.000564972	0	1	splice_acceptor_variant&intron_variant|DNAH5|	0	1	0	1	0	0	2
chr6	34792919	C	T	AGXT2	0.000564972	0	1	splice_acceptor_variant&intron_variant|AGXT2|	0	0	1	0	0	0	1
chr6	48546132	A	T	EMB	0.000564972	0	1	stop_gained|EMB|p.Cys181*	0	0	0	0	0	0	0
chr6	55236568	G	A	SETD9	0.000564972	0	1	splice_donor_variant&intron_variant|SETD9|	0	0	0	0	0	0	0
chr6	63233038	G	T	SHISAL2B	0.000564972	0	1	splice_donor_variant&intron_variant|SHISAL2B|	0	0	0	0	0	0	0
chr6	74264304	C	CATCTT	WDR41	0.000564972	0	1	frameshift_variant|WDR41|p.Gly381fs	0	0	0	0	0	0	0
chr6	75912395	G	GA	BHMT2	0.000564972	0	1	frameshift_variant|BHMT2|p.Ile113fs	0	0	1	0	0	0	1
chr6	91334207	CAT	C	KIAA0825	0.000564972	0	1	frameshift_variant|KIAA0825|p.Met473fs	0	0	0	0	0	0	0
chr6	91875779	C	T	MCTP1	0.000564972	0	1	splice_donor_variant&intron_variant|MCTP1|	0	0	0	0	0	0	0
chr6	93614062	T	TA	ERAP1	0.000564972	0	1	frameshift_variant|ERAP1|p.Lys788fs	0	0	0	0	0	0	0
chr6	93737684	GA	G	ERAP2	0.000564972	0	1	frameshift_variant|ERAP2|p.Ile534fs	0	0	0	0	0	0	0
chr6	93750847	G	A	ERAP2	0.000564972	0	1	stop_gained|ERAP2|p.Trp792*	0	0	0	0	0	0	0
chr6	99633934	A	AG	SLCO4C1	0.000564972	0	1	frameshift_variant|SLCO4C1|p.Phe527fs	0	0	0	0	0	0	0
chr6	99869189	C	A	SLCO6A1	0.000564972	0	1	stop_gained|SLCO6A1|p.Glu212*	0	0	0	0	0	0	0
chr6	126530380	GTATAAATA	G	SLC27A6	0.000564972	0	1	splice_donor_variant&splice_region_variant&intron_variant|SLC27A6|	0	0	0	0	0	0	0
chr6	127150232	C	T	ADAMTS19	0.000564972	0	1	stop_gained|ADAMTS19|p.Gln914*	0	0	0	0	0	0	0
chr6	129644855	CTG	C	P4HA2	0.000564972	0	1	splice_acceptor_variant&splice_region_variant&intron_variant|P4HA2|	0	0	1	0	0	0	1
chr6	132127639	T	TAC	SEC24A	0.000564972	0	1	frameshift_variant|SEC24A|p.Ser113fs	0	0	0	0	0	0	0
chr6	132127642	TTC	T	SEC24A	0.000564972	0	1	frameshift_variant|SEC24A|p.Gln114fs	0	0	0	0	0	0	0
chr6	133302406	G	A	SLC25A48	0.000564972	0	1	splice_donor_variant&intron_variant|SLC25A48|	0	0	0	0	0	0	0
chr6	133333151	C	T	SLC25A48	0.000564972	0	1	stop_gained|SLC25A48|p.Arg292*	0	0	0	0	0	0	0
chr6	135922398	C	CGTG	ETF1	0.000564972	0	1	splice_acceptor_variant&intron_variant|ETF1|	0	0	0	1	0	0	1
chr6	138051401	AG	A	WDR55	0.000564972	0	1	frameshift_variant|WDR55|p.Ala329fs	0	0	0	1	0	0	1
chr6	138433246	TG	T	PCDHB1	0.000564972	0	1	frameshift_variant|PCDHB1|p.Thr265fs	0	0	0	0	0	0	0
chr6	138765943	CT	C	ENSMMUG00000052308	0.000564972	0	1	frameshift_variant|ENSMMUG00000052308|p.Leu1166fs	0	0	0	0	0	0	0
chr6	146335352	CT	C	ADRB2	0.000564972	0	1	frameshift_variant|ADRB2|p.Thr164fs	0	0	1	0	0	0	1
chr6	146888255	CAGCTG	C	IL17B	0.000564972	0	1	frameshift_variant|IL17B|p.Gln72fs	0	0	0	0	0	0	0
chr6	152228871	C	T	FAXDC2	0.000564972	0	1	stop_gained|FAXDC2|p.Trp173*	0	0	0	0	0	0	0
chr6	152236547	A	AC	FAXDC2	0.000564972	0	1	frameshift_variant|FAXDC2|p.Val117fs	0	0	0	0	0	0	0
chr6	168267959	T	TC	RANBP17	0.000564972	0	1	frameshift_variant|RANBP17|p.Leu77fs	0	0	0	0	0	0	0
chr6	173737434	T	TAC	SIMC1	0.000564972	0	1	frameshift_variant|SIMC1|p.Ser365fs	0	0	0	0	0	0	0
chr6	173787838	C	CCTACA	KIAA1191	0.000564972	0	1	frameshift_variant|KIAA1191|p.Gln173fs	0	0	0	0	0	0	0
chr6	174347236	T	G	HK3	0.000564972	0	1	splice_acceptor_variant&intron_variant|HK3|	0	0	0	0	0	0	0
chr6	174887630	TC	T	SLC34A1	0.000564972	0	1	frameshift_variant&splice_region_variant|SLC34A1|p.Gln513fs	1	0	0	1	0	0	2
chr6	176276845	TATTATTC	T	ZNF354B	0.000564972	0	1	frameshift_variant|ZNF354B|p.Ile454fs	0	0	0	0	0	0	0
chr7	674734	C	G	ENSMMUG00000057676	0.000564972	0	1	splice_donor_variant&intron_variant|ENSMMUG00000057676|	0	0	0	0	0	0	0
chr7	5663713	CTG	C	ENSMMUG00000021656	0.000564972	0	1	splice_acceptor_variant&splice_region_variant&intron_variant|ENSMMUG00000021656|	0	0	0	0	0	0	0
chr7	10445003	C	CCGTCTCA	EMC7	0.000564972	0	1	splice_acceptor_variant&intron_variant|EMC7|	0	0	0	0	0	0	0
chr7	10868358	C	CTA	ENSMMUG00000014208	0.000564972	0	1	frameshift_variant|ENSMMUG00000014208|p.Ser182fs	0	0	0	0	0	0	0
chr7	10936663	C	T	ENSMMUG00000014208	0.000564972	0	1	splice_donor_variant&intron_variant|ENSMMUG00000014208|	0	0	0	0	0	0	0
chr7	14367391	G	A	TMCO5A	0.000564972	0	1	splice_acceptor_variant&intron_variant|TMCO5A|	0	0	0	0	0	0	0
chr7	17307362	A	AG	SPINT1	0.000564972	0	1	frameshift_variant|SPINT1|p.Phe157fs	0	0	0	1	0	0	1
chr7	18194009	A	C	MGA	0.000564972	0	1	splice_acceptor_variant&intron_variant|MGA|	0	0	0	0	0	0	0
chr7	18329214	G	A	PLA2G4B	0.000564972	0	1	stop_gained|PLA2G4B|p.Trp67*	0	0	0	0	0	0	0
chr7	18378376	C	T	SPTBN5	0.000564972	0	1	splice_donor_variant&intron_variant|SPTBN5|	0	0	0	0	0	0	0
chr7	18582891	G	C	PLA2G4D	0.000564972	0	1	stop_gained|PLA2G4D|p.Ser5*	0	0	0	0	0	0	0
chr7	18642792	C	A	PLA2G4F	0.000564972	0	1	stop_gained|PLA2G4F|p.Glu111*	0	0	0	0	0	0	0
chr7	18839352	T	A	GANC	0.000564972	0	1	stop_gained|GANC|p.Leu603*	0	0	1	0	0	0	1
chr7	19652132	A	C	TMEM62	0.000564972	0	1	splice_acceptor_variant&intron_variant|TMEM62|	0	0	0	0	0	0	0
chr7	19818677	CACAA	C	LCMT2	0.000564972	0	1	frameshift_variant|LCMT2|p.Phe496fs	0	0	1	0	0	0	1
chr7	19884149	A	G	TUBGCP4	0.000564972	0	1	splice_acceptor_variant&intron_variant|TUBGCP4|	0	0	0	0	0	0	0
chr7	21537499	C	A	DUOXA2	0.000564972	0	1	stop_gained|DUOXA2|p.Tyr126*	0	1	0	0	0	0	1
chr7	26663431	G	A	HDC	0.000564972	0	1	stop_gained|HDC|p.Arg220*	0	0	1	0	0	0	1
chr7	27317245	G	T	AP4E1	0.000564972	0	1	stop_gained|AP4E1|p.Glu164*	0	0	0	0	0	0	0
chr7	28418804	A	AG	MAPK6	0.000564972	0	1	frameshift_variant&stop_gained|MAPK6|p.Tyr205fs	0	0	0	1	0	0	1
chr7	31611358	C	T	RSL24D1	0.000564972	0	1	stop_gained|RSL24D1|p.Trp51*	0	0	1	1	0	0	2
chr7	38403306	T	TA	VPS13C	0.000564972	0	1	frameshift_variant|VPS13C|p.Leu1512fs	0	0	0	0	0	0	0
chr7	40046724	ATT	A	FBXL22	0.000564972	0	1	frameshift_variant|FBXL22|p.Phe111fs	0	0	0	0	0	0	0
chr7	40100640	G	A	HERC1	0.000564972	0	1	stop_gained|HERC1|p.Arg3310*	0	0	0	0	0	0	0
chr7	41353762	TG	T	PIF1	0.000564972	0	1	frameshift_variant|PIF1|p.Gln179fs	0	0	0	0	0	0	0
chr7	42191116	C	T	SLC24A1	0.000564972	0	1	stop_gained|SLC24A1|p.Gln642*	0	0	0	0	0	0	0
chr7	43163532	CAG	C	LCTL	0.000564972	0	1	frameshift_variant|LCTL|p.Leu186fs	0	0	1	0	0	0	1
chr7	45008727	T	C	ITGA11	0.000564972	0	1	splice_acceptor_variant&intron_variant|ITGA11|	0	0	0	0	0	0	0
chr7	45727169	A	G	NOX5	0.000564972	0	1	splice_acceptor_variant&intron_variant|NOX5|	0	0	0	0	0	0	0
chr7	45727234	C	T	NOX5	0.000564972	0	1	stop_gained|NOX5|p.Gln80*	0	0	0	0	0	0	0
chr7	45741746	A	T	NOX5	0.000564972	0	1	stop_gained|NOX5|p.Lys505*	0	0	0	0	0	0	0
chr7	50984282	AGGGTG	A	ENSMMUG00000061904	0.000564972	0	1	frameshift_variant|ENSMMUG00000061904|p.Thr67fs	0	0	0	0	0	0	0
chr7	52449342	C	CA	ENSMMUG00000061079	0.000564972	0	1	frameshift_variant|ENSMMUG00000061079|p.Gly293fs	0	0	0	0	0	0	0
chr7	52489640	C	T	NEIL1	0.000564972	0	1	stop_gained|NEIL1|p.Gln346*	0	0	1	0	0	0	1
chr7	52860614	C	T	ODF3L1	0.000564972	0	1	stop_gained|ODF3L1|p.Gln30*	0	0	0	0	0	0	0
chr7	63547150	A	ATTGTTTG	SLC28A1	0.000564972	0	1	frameshift_variant|SLC28A1|p.Gly212fs	0	0	0	0	0	0	0
chr7	63849403	CACATT	C	ZSCAN2	0.000564972	0	1	frameshift_variant|ZSCAN2|p.Glu254fs	0	0	0	0	0	0	0
chr7	64500542	A	G	AKAP13	0.000564972	0	1	splice_acceptor_variant&intron_variant|AKAP13|	0	0	0	0	0	0	0
chr7	67305503	C	CA	DET1	0.000564972	0	1	frameshift_variant|DET1|p.Leu73fs	0	0	0	0	0	0	0
chr7	81237019	TC	T	OR4F15	0.000564972	0	1	frameshift_variant|OR4F15|p.Tyr258fs	0	0	0	0	0	0	0
chr7	82224951	GCCCCA	G	TEP1	0.000564972	0	1	frameshift_variant|TEP1|p.Val2131fs	0	0	0	0	0	0	0
chr7	82230687	G	A	TEP1	0.000564972	0	1	stop_gained|TEP1|p.Arg1656*	0	0	0	0	0	0	0
chr7	82967529	G	C	ARHGEF40	0.000564972	0	1	splice_acceptor_variant&intron_variant|ARHGEF40|	0	0	0	0	0	0	0
chr7	85400809	TC	T	EFS	0.000564972	0	1	frameshift_variant|EFS|p.Asp401fs	0	0	0	0	0	0	0
chr7	85607758	C	CA	AP1G2	0.000564972	0	1	frameshift_variant|AP1G2|p.Gly67fs	0	0	0	0	0	0	0
chr7	86252661	C	T	IRF9	0.000564972	0	1	stop_gained|IRF9|p.Arg285*	0	0	0	0	0	0	0
chr7	86396761	C	CG	CIDEB	0.000564972	0	1	frameshift_variant|CIDEB|p.Val16fs	0	0	0	0	0	0	0
chr7	86644259	ACT	A	CTSG	0.000564972	0	1	frameshift_variant|CTSG|p.Arg117fs	0	0	1	0	0	0	1
chr7	92973022	AT	A	COCH	0.000564972	0	1	frameshift_variant|COCH|p.Phe389fs	1	0	0	0	0	0	1
chr7	100281696	CT	C	SSTR1	0.000564972	0	1	frameshift_variant|SSTR1|p.Ser117fs	0	0	1	0	0	0	1
chr7	107187290	C	T	C7H14orf28	0.000564972	0	1	stop_gained|C7H14orf28|p.Arg20*	0	0	0	0	0	0	0
chr7	107192483	G	T	C7H14orf28	0.000564972	0	1	splice_acceptor_variant&intron_variant|C7H14orf28|	0	0	0	0	0	0	0
chr7	107494891	C	CTAAA	FANCM	0.000564972	0	1	frameshift_variant|FANCM|p.Lys1652fs	0	1	0	0	0	0	1
chr7	107531766	C	A	MIS18BP1	0.000564972	0	1	stop_gained|MIS18BP1|p.Glu733*	0	0	0	0	0	0	0
chr7	114607880	A	G	TXNDC16	0.000564972	0	1	splice_donor_variant&intron_variant|TXNDC16|	0	0	0	0	0	0	0
chr7	116580313	CT	C	GMFB	0.000564972	0	1	splice_acceptor_variant&intron_variant|GMFB|	0	0	0	0	0	0	0
chr7	120566106	CAG	C	KIAA0586	0.000564972	0	1	frameshift_variant|KIAA0586|p.Glu1033fs	0	0	0	1	0	0	1
chr7	121413399	T	TCGGC	DAAM1	0.000564972	0	1	frameshift_variant|DAAM1|p.Glu351fs	0	0	0	1	0	0	1
chr7	135957152	C	CT	PTGR2	0.000564972	0	1	frameshift_variant|PTGR2|p.Tyr45fs	0	0	1	0	0	0	1
chr7	136050019	T	TC	COQ6	0.000564972	0	1	frameshift_variant|COQ6|p.Gly29fs	0	0	0	0	0	0	0
chr7	138979161	A	G	LRRC74A	0.000564972	0	1	splice_acceptor_variant&intron_variant|LRRC74A|	0	0	0	0	0	0	0
chr7	139455523	GT	G	TMED8	0.000564972	0	1	frameshift_variant|TMED8|p.Asp103fs	0	0	0	0	0	0	0
chr7	139491695	G	T	SAMD15	0.000564972	0	1	stop_gained|SAMD15|p.Glu323*	0	0	0	0	0	0	0
chr7	153361229	TC	T	DGLUCY	0.000564972	0	1	frameshift_variant|DGLUCY|p.Leu538fs	0	0	0	0	0	0	0
chr7	165141972	CAG	C	ENSMMUG00000011751	0.000564972	0	1	frameshift_variant|ENSMMUG00000011751|p.Leu43fs	0	0	0	0	0	0	0
chr7	165828648	ACCGC	A	CKB	0.000564972	0	1	frameshift_variant&splice_region_variant|CKB|p.Gly333fs	0	0	1	0	0	0	1
chr7	166412648	AT	A	ASPG	0.000564972	0	1	frameshift_variant|ASPG|p.Met129fs	0	0	1	0	0	0	1
chr7	167243040	A	G	PLD4	0.000564972	0	1	splice_acceptor_variant&intron_variant|PLD4|	0	0	0	0	0	0	0
chr8	1234108	G	A	ERICH1	0.000564972	0	1	stop_gained|ERICH1|p.Gln409*	0	0	0	0	0	0	0
chr8	8535996	TG	T	ENSMMUG00000040877	0.000564972	0	1	frameshift_variant|ENSMMUG00000040877|p.Gln49fs	0	0	0	0	0	0	0
chr8	18028935	G	A	FGL1	0.000564972	0	1	stop_gained|FGL1|p.Gln47*	0	0	0	0	0	0	0
chr8	18366442	GTTGGCTA	G	NAT1	0.000564972	0	1	frameshift_variant|NAT1|p.Gly20fs	0	0	0	0	0	0	0
chr8	22076371	G	GC	DOK2	0.000564972	0	1	frameshift_variant|DOK2|p.Pro124fs	0	0	0	0	0	0	0
chr8	28293679	C	A	NUGGC	0.000564972	0	1	stop_gained|NUGGC|p.Glu700*	0	0	0	0	0	0	0
chr8	31139401	C	A	TEX15	0.000564972	0	1	stop_gained|TEX15|p.Glu2996*	0	0	0	0	0	0	0
chr8	38335337	CCA	C	RAB11FIP1	0.000564972	0	1	frameshift_variant|RAB11FIP1|p.Gly720fs	0	0	0	0	0	0	0
chr8	43372881	GAC	G	CHRNA6	0.000564972	0	1	frameshift_variant|CHRNA6|p.Val300fs	0	0	1	0	0	0	1
chr8	55081033	AACAC	A	SOX17	0.000564972	0	1	frameshift_variant|SOX17|p.Gln316fs	1	0	0	1	0	0	2
chr8	55081039	A	AGC	SOX17	0.000564972	0	1	frameshift_variant|SOX17|p.Gln320fs	1	0	0	1	0	0	2
chr8	66799537	TC	T	TRIM55	0.000564972	0	1	frameshift_variant|TRIM55|p.Pro432fs	0	0	0	0	0	0	0
chr8	67100577	CG	C	ADHFE1	0.000564972	0	1	frameshift_variant|ADHFE1|p.Ala373fs	0	0	0	0	0	0	0
chr8	69082661	C	T	C8H8orf34	0.000564972	0	1	stop_gained|C8H8orf34|p.Arg245*	0	0	0	0	0	0	0
chr8	70217441	C	T	SULF1	0.000564972	0	1	stop_gained|SULF1|p.Arg612*	0	0	0	0	0	0	0
chr8	75489707	G	T	CRISPLD1	0.000564972	0	1	splice_acceptor_variant&intron_variant|CRISPLD1|	0	0	0	0	0	0	0
chr8	85875515	G	A	CA1	0.000564972	0	1	stop_gained|CA1|p.Arg174*	0	0	1	0	0	0	1
chr8	91319155	C	T	NECAB1	0.000564972	0	1	stop_gained|NECAB1|p.Arg183*	0	0	0	0	0	0	0
chr8	94698283	TAC	T	RAD54B	0.000564972	0	1	frameshift_variant|RAD54B|p.Val724fs	0	0	0	0	0	0	0
chr8	98304773	G	A	MATN2	0.000564972	0	1	splice_donor_variant&intron_variant|MATN2|	0	0	0	0	0	0	0
chr8	98405157	C	T	ENSMMUG00000064281	0.000564972	0	1	splice_donor_variant&intron_variant|ENSMMUG00000064281|	0	0	0	0	0	0	0
chr8	99399984	C	A	VPS13B	0.000564972	0	1	stop_gained|VPS13B|p.Cys452*	0	1	0	0	0	0	1
chr8	100330421	C	CT	RGS22	0.000564972	0	1	frameshift_variant|RGS22|p.Glu848fs	0	0	0	0	0	0	0
chr8	100871644	C	CA	SNX31	0.000564972	0	1	frameshift_variant|SNX31|p.Glu358fs	0	0	0	0	0	0	0
chr8	100901281	ACATAC	A	SNX31	0.000564972	0	1	splice_donor_variant&splice_region_variant&intron_variant|SNX31|	0	0	0	0	0	0	0
chr8	109633451	C	T	PKHD1L1	0.000564972	0	1	stop_gained|PKHD1L1|p.Gln1238*	0	0	0	0	0	0	0
chr8	109670186	C	CA	PKHD1L1	0.000564972	0	1	frameshift_variant|PKHD1L1|p.Asn2948fs	0	0	0	0	0	0	0
chr8	109690661	CAG	C	PKHD1L1	0.000564972	0	1	frameshift_variant|PKHD1L1|p.Ser3496fs	0	0	0	0	0	0	0
chr8	116766823	CG	C	ENSMMUG00000001087	0.000564972	0	1	frameshift_variant|ENSMMUG00000001087|p.Arg250fs	0	0	0	0	0	0	0
chr8	123458613	C	T	TBC1D31	0.000564972	0	1	stop_gained|TBC1D31|p.Arg913*	0	0	0	0	0	0	0
chr8	123953480	TAG	T	KLHL38	0.000564972	0	1	frameshift_variant|KLHL38|p.Tyr553fs	0	0	0	0	0	0	0
chr8	123992910	T	C	ANXA13	0.000564972	0	1	splice_acceptor_variant&intron_variant|ANXA13|	0	0	0	0	0	0	0
chr8	130097818	G	A	GSDMC	0.000564972	0	1	stop_gained|GSDMC|p.Arg40*	0	0	0	0	0	0	0
chr8	132323915	C	T	OC90	0.000564972	0	1	splice_donor_variant&intron_variant|OC90|	0	0	0	0	0	0	0
chr8	143839619	A	T	NAPRT	0.000564972	0	1	splice_donor_variant&intron_variant|NAPRT|	0	0	0	0	0	0	0
chr9	6336409	GCA	G	ENSMMUG00000000958	0.000564972	0	1	frameshift_variant|ENSMMUG00000000958|p.Ala146fs	0	0	0	0	0	0	0
chr9	6378679	G	T	AKR1C8	0.000564972	0	1	stop_gained&splice_region_variant|AKR1C8|p.Glu134*	0	0	0	0	0	0	0
chr9	7044213	CT	C	ANKRD16	0.000564972	0	1	frameshift_variant&splice_region_variant|ANKRD16|p.Lys283fs	0	0	0	0	0	0	0
chr9	7044219	T	TG	ANKRD16	0.000564972	0	1	frameshift_variant|ANKRD16|p.Ala282fs	0	0	0	0	0	0	0
chr9	13344114	AG	A	CDC123	0.000564972	0	1	frameshift_variant|CDC123|p.Thr22fs	0	0	0	0	1	0	1
chr9	14385362	G	A	UCMA	0.000564972	0	1	stop_gained|UCMA|p.Gln5*	0	0	0	0	0	0	0
chr9	17971817	G	A	CUBN	0.000564972	0	1	stop_gained|CUBN|p.Gln3430*	0	1	1	1	0	0	3
chr9	18073993	T	G	CUBN	0.000564972	0	1	splice_acceptor_variant&intron_variant|CUBN|	0	1	1	1	0	0	3
chr9	20423697	T	G	MALRD1	0.000564972	0	1	stop_gained|MALRD1|p.Leu1045*	0	0	0	0	0	0	0
chr9	20687408	G	A	MALRD1	0.000564972	0	1	splice_acceptor_variant&intron_variant|MALRD1|	0	0	0	0	0	0	0
chr9	24057753	G	A	ARMC3	0.000564972	0	1	splice_acceptor_variant&intron_variant|ARMC3|	0	0	0	0	0	0	0
chr9	27126264	T	TAAAC	MYO3A	0.000564972	0	1	frameshift_variant|MYO3A|p.Ile734fs	0	1	1	0	0	0	2
chr9	27933479	TAA	T	ANKRD26	0.000564972	0	1	frameshift_variant|ANKRD26|p.Leu856fs	0	0	0	0	0	0	0
chr9	41490031	TGA	T	BMS1	0.000564972	0	1	frameshift_variant|BMS1|p.Asp767fs	0	0	0	0	0	0	0
chr9	41490034	TA	T	BMS1	0.000564972	0	1	frameshift_variant|BMS1|p.Asp769fs	0	0	0	0	0	0	0
chr9	45890401	T	C	ENSMMUG00000060110	0.000564972	0	1	splice_donor_variant&intron_variant|ENSMMUG00000060110|	0	0	0	0	0	0	0
chr9	49149539	T	TTTCC	FRMPD2	0.000564972	0	1	frameshift_variant|FRMPD2|p.Glu457fs	0	0	0	0	0	0	0
chr9	49894214	C	T	ENSMMUG00000051045	0.000564972	0	1	stop_gained|ENSMMUG00000051045|p.Gln272*	0	0	0	0	0	0	0
chr9	50564440	G	GTTTCC	ENSMMUG00000052696	0.000564972	0	1	frameshift_variant|ENSMMUG00000052696|p.Thr99fs	0	0	0	0	0	0	0
chr9	58535131	A	AG	ZMIZ1	0.000564972	0	1	splice_acceptor_variant&intron_variant|ZMIZ1|	0	0	0	1	0	0	1
chr9	62762710	CTT	C	KAT6B	0.000564972	0	1	frameshift_variant|KAT6B|p.Glu1368fs	0	0	0	1	0	1	2
chr9	64542170	A	C	FAM149B1	0.000564972	0	1	splice_donor_variant&intron_variant|FAM149B1|	0	0	0	0	0	0	0
chr9	67649319	CT	C	TYSND1	0.000564972	0	1	frameshift_variant|TYSND1|p.Cys448fs	0	0	0	0	0	0	0
chr9	68392706	C	G	TACR2	0.000564972	0	1	stop_gained|TACR2|p.Tyr197*	0	0	1	0	0	0	1
chr9	69010689	C	A	STOX1	0.000564972	0	1	stop_gained|STOX1|p.Glu488*	0	0	0	0	0	0	0
chr9	81716669	G	A	ZWINT	0.000564972	0	1	splice_donor_variant&intron_variant|ZWINT|	0	0	0	0	0	0	0
chr9	81716670	T	A	ZWINT	0.000564972	0	1	splice_donor_variant&intron_variant|ZWINT|	0	0	0	0	0	0	0
chr9	88005000	GGTGA	G	PAPSS2	0.000564972	0	1	splice_donor_variant&splice_region_variant&intron_variant|PAPSS2|	0	1	0	0	0	0	1
chr9	93580662	C	CA	MYOF	0.000564972	0	1	frameshift_variant|MYOF|p.Ser136fs	0	0	0	0	0	0	0
chr9	94480204	G	C	PLCE1	0.000564972	0	1	splice_donor_variant&intron_variant|PLCE1|	0	1	0	0	0	0	1
chr9	94765458	G	A	HELLS	0.000564972	0	1	splice_donor_variant&intron_variant|HELLS|	0	0	0	1	0	0	1
chr9	95024285	G	A	CYP2C19	0.000564972	0	1	stop_gained|CYP2C19|p.Arg186*	0	1	1	0	0	0	2
chr9	98879347	C	A	HPS1	0.000564972	0	1	stop_gained|HPS1|p.Glu288*	0	1	0	0	0	0	1
chr9	100230618	C	CT	CUTC	0.000564972	0	1	frameshift_variant|CUTC|p.Glu159fs	0	0	0	0	0	0	0
chr9	100749530	C	T	PKD2L1	0.000564972	0	1	splice_acceptor_variant&intron_variant|PKD2L1|	1	0	0	0	0	0	1
chr9	100972571	C	T	SEC31B	0.000564972	0	1	stop_gained|SEC31B|p.Trp349*	0	0	0	0	0	0	0
chr9	103273363	A	T	WBP1L	0.000564972	0	1	splice_acceptor_variant&intron_variant|WBP1L|	0	0	0	0	0	0	0
chr9	103372452	G	GGGTT	CYP17A1	0.000564972	0	1	frameshift_variant|CYP17A1|p.Pro508fs	0	1	1	1	0	0	3
chr9	114808227	C	T	VWA2	0.000564972	0	1	stop_gained|VWA2|p.Arg446*	0	0	0	0	0	0	0
chr9	122551786	C	CTT	TACC2	0.000564972	0	1	frameshift_variant|TACC2|p.Ser982fs	0	0	0	0	0	0	0
chr9	124215799	CA	C	CPXM2	0.000564972	0	1	frameshift_variant|CPXM2|p.Leu462fs	0	0	0	0	0	0	0
chr9	130504471	ACT	A	C10orf143	0.000564972	0	1	frameshift_variant|C10orf143|p.Ser70fs	0	0	0	0	0	0	0
chr10	1264060	G	A	SELENOO	0.000564972	0	1	stop_gained|SELENOO|p.Gln553*	0	0	0	0	0	0	0
chr10	5222577	G	A	TTC38	0.000564972	0	1	stop_gained|TTC38|p.Gln302*	0	0	0	0	0	0	0
chr10	5762171	T	A	ATXN10	0.000564972	0	1	splice_acceptor_variant&intron_variant|ATXN10|	1	0	0	0	0	0	1
chr10	6072159	GC	G	RIBC2	0.000564972	0	1	frameshift_variant|RIBC2|p.Lys295fs	0	0	0	0	0	0	0
chr10	6105471	CAAAT	C	SMC1B	0.000564972	0	1	frameshift_variant|SMC1B|p.Ile424fs	0	0	0	0	0	0	0
chr10	6704629	C	T	ARHGAP8	0.000564972	0	1	splice_donor_variant&intron_variant|ARHGAP8|	0	0	0	0	0	0	0
chr10	7291810	C	A	PARVG	0.000564972	0	1	stop_gained|PARVG|p.Glu181*	0	0	0	0	0	0	0
chr10	7327411	G	A	PARVB	0.000564972	0	1	stop_gained|PARVB|p.Gln336*	0	0	0	0	0	0	0
chr10	8315924	G	A	TTLL12	0.000564972	0	1	splice_donor_variant&intron_variant|TTLL12|	0	0	0	0	0	0	0
chr10	8920487	GCTGA	G	ENSMMUG00000049928	0.000564972	0	1	frameshift_variant|ENSMMUG00000049928|p.Val58fs	0	0	0	0	0	0	0
chr10	9432248	CA	C	NAGA	0.000564972	0	1	frameshift_variant|NAGA|p.Asn306fs	0	1	1	0	0	0	2
chr10	12022668	GT	G	ATF4	0.000564972	0	1	frameshift_variant|ATF4|p.Thr189fs	0	0	0	1	0	0	1
chr10	12472085	C	T	APOBEC3H	0.000564972	0	1	splice_acceptor_variant&intron_variant|APOBEC3H|	0	0	0	0	0	0	0
chr10	15821387	TC	T	APOL5	0.000564972	0	1	frameshift_variant|APOL5|p.Glu85fs	0	0	0	0	0	0	0
chr10	26149417	C	T	PIWIL3	0.000564972	0	1	splice_acceptor_variant&intron_variant|PIWIL3|	0	0	0	0	0	0	0
chr10	27034897	T	TTCCG	ENSMMUG00000000066	0.000564972	0	1	frameshift_variant|ENSMMUG00000000066|p.Leu154fs	0	0	0	0	0	0	0
chr10	27999876	G	T	DERL3	0.000564972	0	1	stop_gained|DERL3|p.Tyr130*	0	0	0	0	0	0	0
chr10	28497243	C	CT	ENSMMUG00000043974	0.000564972	0	1	frameshift_variant|ENSMMUG00000043974|p.Gly261fs	0	0	0	0	0	0	0
chr10	28643410	G	A	ENSMMUG00000020999	0.000564972	0	1	stop_gained|ENSMMUG00000020999|p.Arg139*	0	0	0	0	0	0	0
chr10	28748752	T	TG	UPB1	0.000564972	0	1	frameshift_variant|UPB1|p.His175fs	0	1	0	0	0	0	1
chr10	28751079	T	C	UPB1	0.000564972	0	1	splice_acceptor_variant&intron_variant|UPB1|	0	1	0	0	0	0	1
chr10	30520576	CAG	C	ENSMMUG00000047978	0.000564972	0	1	frameshift_variant|ENSMMUG00000047978|p.Glu239fs	0	0	0	0	0	0	0
chr10	30804299	CCA	C	ENSMMUG00000047015	0.000564972	0	1	frameshift_variant|ENSMMUG00000047015|p.Thr341fs	0	0	0	0	0	0	0
chr10	30911794	A	AG	VPREB1	0.000564972	0	1	frameshift_variant|VPREB1|p.Arg149fs	0	0	0	0	0	0	0
chr10	31132839	G	A	MAPK1	0.000564972	0	1	splice_donor_variant&intron_variant|MAPK1|	0	0	1	1	0	0	2
chr10	31134962	G	A	MAPK1	0.000564972	0	1	splice_donor_variant&intron_variant|MAPK1|	0	0	1	1	0	0	2
chr10	34903021	T	C	HDHD5	0.000564972	0	1	splice_donor_variant&intron_variant|HDHD5|	0	0	0	0	0	0	0
chr10	45999012	A	G	RALGAPA2	0.000564972	0	1	splice_acceptor_variant&intron_variant|RALGAPA2|	0	0	0	0	0	0	0
chr10	50303475	T	TG	ENSMMUG00000056722	0.000564972	0	1	frameshift_variant|ENSMMUG00000056722|p.Asp150fs	0	0	0	0	0	0	0
chr10	50304032	G	GC	ENSMMUG00000056722	0.000564972	0	1	frameshift_variant|ENSMMUG00000056722|p.Val336fs	0	0	0	0	0	0	0
chr10	50304034	GTGGCTAT	G	ENSMMUG00000056722	0.000564972	0	1	frameshift_variant|ENSMMUG00000056722|p.Ala337fs	0	0	0	0	0	0	0
chr10	55923873	GT	G	SLX4IP	0.000564972	0	1	frameshift_variant|SLX4IP|p.Lys302fs	0	0	0	0	0	0	0
chr10	56138612	T	TAC	MKKS	0.000564972	0	1	frameshift_variant|MKKS|p.Pro299fs	0	1	0	1	0	0	2
chr10	62622846	C	A	MAVS	0.000564972	0	1	stop_gained&splice_region_variant|MAVS|p.Glu155*	0	0	0	0	0	0	0
chr10	63458771	GGCTGA	G	GNRH2	0.000564972	0	1	frameshift_variant|GNRH2|p.Ser41fs	0	0	0	0	0	0	0
chr10	64105091	G	A	TGM6	0.000564972	0	1	stop_gained|TGM6|p.Gln154*	0	0	0	0	0	0	0
chr10	65252063	G	T	SDCBP2	0.000564972	0	1	stop_gained|SDCBP2|p.Glu115*	0	0	0	0	0	0	0
chr10	65321293	C	T	RAD21L1	0.000564972	0	1	splice_donor_variant&intron_variant|RAD21L1|	0	0	0	0	0	0	0
chr10	65321366	CA	C	RAD21L1	0.000564972	0	1	frameshift_variant|RAD21L1|p.Asn261fs	0	0	0	0	0	0	0
chr10	67038521	G	C	TPX2	0.000564972	0	1	splice_donor_variant&intron_variant|TPX2|	0	0	0	0	1	0	1
chr10	68149151	T	C	EFCAB8	0.000564972	0	1	splice_donor_variant&intron_variant|EFCAB8|	0	0	0	0	0	0	0
chr10	68261782	A	G	BPIFB2	0.000564972	0	1	splice_acceptor_variant&intron_variant|BPIFB2|	0	0	0	0	0	0	0
chr10	68274838	G	A	BPIFB6	0.000564972	0	1	splice_acceptor_variant&intron_variant|BPIFB6|	0	0	0	0	0	0	0
chr10	68307978	G	T	BPIFB3	0.000564972	0	1	splice_acceptor_variant&intron_variant|BPIFB3|	0	0	0	0	0	0	0
chr10	70193723	C	T	MYH7B	0.000564972	0	1	stop_gained|MYH7B|p.Gln375*	0	0	0	0	0	0	0
chr10	73493978	G	A	KIAA1755	0.000564972	0	1	stop_gained|KIAA1755|p.Gln670*	0	0	0	0	0	0	0
chr10	73507873	GTCTTGGTC	G	KIAA1755	0.000564972	0	1	frameshift_variant|KIAA1755|p.Gly442fs	0	0	0	0	0	0	0
chr10	73598983	A	G	BPI	0.000564972	0	1	splice_acceptor_variant&intron_variant|BPI|	0	0	1	0	0	0	1
chr10	76358909	G	GAAATGAC	TOP1	0.000564972	0	1	splice_donor_variant&intron_variant|TOP1|	0	0	1	1	1	0	3
chr10	76377134	G	GC	TOP1	0.000564972	0	1	frameshift_variant|TOP1|p.Glu606fs	0	0	1	1	1	0	3
chr10	76612511	AG	A	LPIN3	0.000564972	0	1	splice_acceptor_variant&intron_variant|LPIN3|	0	0	0	0	0	0	0
chr10	78956535	T	TG	GTSF1L	0.000564972	0	1	frameshift_variant|GTSF1L|p.Gln92fs	0	0	0	0	0	0	0
chr10	81037372	GC	G	ACOT8	0.000564972	0	1	frameshift_variant|ACOT8|p.Gly61fs	0	0	0	0	0	0	0
chr10	84464737	AG	A	ZNFX1	0.000564972	0	1	frameshift_variant|ZNFX1|p.Leu1630fs	0	0	0	0	0	0	0
chr10	95138965	C	T	CDH26	0.000564972	0	1	stop_gained|CDH26|p.Gln225*	0	0	0	0	0	0	0
chr10	97826067	C	CCTGCAACA	SLCO4A1	0.000564972	0	1	frameshift_variant|SLCO4A1|p.Cys499fs	0	0	0	0	0	0	0
chr11	2937379	CG	C	NRIP2	0.000564972	0	1	frameshift_variant|NRIP2|p.Arg88fs	0	0	0	0	0	0	0
chr11	4676675	T	TC	DYRK4	0.000564972	0	1	frameshift_variant|DYRK4|p.Leu105fs	0	0	0	0	0	0	0
chr11	6105403	C	CT	VWF	0.000564972	0	1	splice_acceptor_variant&intron_variant|VWF|	1	1	1	0	0	0	3
chr11	6614600	C	T	TAPBPL	0.000564972	0	1	stop_gained|TAPBPL|p.Arg473*	0	0	0	0	0	0	0
chr11	7944748	C	T	CLEC4C	0.000564972	0	1	stop_gained|CLEC4C|p.Trp104*	0	0	0	0	0	0	0
chr11	9811863	GGCACA	G	KLRF2	0.000564972	0	1	frameshift_variant|KLRF2|p.Cys201fs	0	0	0	0	0	0	0
chr11	10916111	TC	T	A2ML1	0.000564972	0	1	frameshift_variant|A2ML1|p.Lys511fs	0	0	0	0	0	0	0
chr11	13458011	T	TTC	BCL2L14	0.000564972	0	1	frameshift_variant|BCL2L14|p.His126fs	0	0	0	0	0	0	0
chr11	17062440	G	A	EPS8	0.000564972	0	1	stop_gained|EPS8|p.Gln462*	0	0	0	0	0	0	0
chr11	19974830	CAA	C	PIK3C2G	0.000564972	0	1	frameshift_variant&splice_region_variant|PIK3C2G|p.Asn1337fs	0	0	1	0	0	0	1
chr11	22868475	C	CT	RECQL	0.000564972	0	1	splice_acceptor_variant&intron_variant|RECQL|	0	0	0	0	0	0	0
chr11	22943582	C	T	GYS2	0.000564972	0	1	splice_donor_variant&intron_variant|GYS2|	0	1	0	0	0	0	1
chr11	22961582	G	A	GYS2	0.000564972	0	1	stop_gained|GYS2|p.Arg147*	0	1	0	0	0	0	1
chr11	28785585	CTA	C	SMCO2	0.000564972	0	1	frameshift_variant|SMCO2|p.Tyr132fs	0	0	0	0	0	0	0
chr11	28785588	C	CTT	SMCO2	0.000564972	0	1	frameshift_variant|SMCO2|p.Trp133fs	0	0	0	0	0	0	0
chr11	38911060	GC	G	ABCD2	0.000564972	0	1	frameshift_variant|ABCD2|p.Gly279fs	0	0	0	0	0	0	0
chr11	41734827	AGT	A	PPHLN1	0.000564972	0	1	frameshift_variant|PPHLN1|p.Ser21fs	0	0	0	1	0	0	1
chr11	41734831	A	ACC	PPHLN1	0.000564972	0	1	frameshift_variant|PPHLN1|p.Pro23fs	0	0	0	1	0	0	1
chr11	42953204	C	T	ADAMTS20	0.000564972	0	1	splice_acceptor_variant&intron_variant|ADAMTS20|	0	0	0	0	0	0	0
chr11	46598403	GA	G	AMIGO2	0.000564972	0	1	frameshift_variant|AMIGO2|p.Ser361fs	0	0	0	0	0	0	0
chr11	46598406	TAC	T	AMIGO2	0.000564972	0	1	frameshift_variant|AMIGO2|p.Tyr360fs	0	0	0	0	0	0	0
chr11	47262404	G	GAA	ENDOU	0.000564972	0	1	frameshift_variant|ENDOU|p.Leu333fs	0	0	0	0	0	0	0
chr11	48959600	CA	C	DNAJC22	0.000564972	0	1	frameshift_variant|DNAJC22|p.Gln63fs	0	0	0	0	0	0	0
chr11	51820553	G	GAGT	KRT7	0.000564972	0	1	splice_donor_variant&intron_variant|KRT7|	0	0	1	0	0	0	1
chr11	52027770	C	A	ENSMMUG00000057134	0.000564972	0	1	stop_gained|ENSMMUG00000057134|p.Glu343*	0	0	0	0	0	0	0
chr11	52191501	GA	G	KRT73	0.000564972	0	1	frameshift_variant|KRT73|p.Phe152fs	0	0	0	0	0	0	0
chr11	52620962	C	T	TNS2	0.000564972	0	1	stop_gained|TNS2|p.Gln648*	0	0	0	0	0	0	0
chr11	52678310	C	CTT	SOAT2	0.000564972	0	1	frameshift_variant|SOAT2|p.Ala361fs	0	0	1	0	0	0	1
chr11	53103523	G	A	ATF7	0.000564972	0	1	stop_gained|ATF7|p.Arg353*	0	0	0	0	0	0	0
chr11	55403977	TG	T	MMP19	0.000564972	0	1	frameshift_variant|MMP19|p.His179fs	0	0	1	0	0	0	1
chr11	55726371	C	CT	SMARCC2	0.000564972	0	1	splice_acceptor_variant&intron_variant|SMARCC2|	0	0	0	0	0	0	0
chr11	56061959	A	C	GLS2	0.000564972	0	1	stop_gained|GLS2|p.Leu473*	0	0	1	1	0	0	2
chr11	56528628	GGC	G	ENSMMUG00000003763	0.000564972	0	1	frameshift_variant|ENSMMUG00000003763|p.Ala94fs	0	0	0	0	0	0	0
chr11	56607722	C	T	MYO1A	0.000564972	0	1	splice_acceptor_variant&intron_variant|MYO1A|	1	0	0	0	0	0	1
chr11	64269142	A	AC	GNS	0.000564972	0	1	splice_donor_variant&intron_variant|GNS|	0	1	0	0	0	0	1
chr11	64802066	A	T	LEMD3	0.000564972	0	1	splice_acceptor_variant&intron_variant|LEMD3|	1	0	0	1	0	1	3
chr11	68399685	C	A	CPM	0.000564972	0	1	stop_gained|CPM|p.Glu290*	0	0	0	0	0	0	0
chr11	71512773	G	A	TPH2	0.000564972	0	1	splice_donor_variant&intron_variant|TPH2|	0	0	1	0	0	0	1
chr11	74889207	C	T	CAPS2	0.000564972	0	1	splice_acceptor_variant&intron_variant|CAPS2|	0	0	0	0	0	0	0
chr11	74897746	C	T	CAPS2	0.000564972	0	1	stop_gained|CAPS2|p.Trp53*	0	0	0	0	0	0	0
chr11	74898901	TC	T	CAPS2	0.000564972	0	1	frameshift_variant|CAPS2|p.Gly39fs	0	0	0	0	0	0	0
chr11	75075877	G	GT	KRR1	0.000564972	0	1	frameshift_variant|KRR1|p.Thr362fs	0	0	0	0	1	0	1
chr11	80237906	G	GA	MYF6	0.000564972	0	1	frameshift_variant|MYF6|p.Met157fs	1	0	0	1	0	0	2
chr11	82031483	G	GA	METTL25	0.000564972	0	1	frameshift_variant|METTL25|p.Ile529fs	0	0	0	0	0	0	0
chr11	92516337	G	T	PLEKHG7	0.000564972	0	1	stop_gained|PLEKHG7|p.Glu134*	0	0	0	0	0	0	0
chr11	95479444	A	AAG	NTN4	0.000564972	0	1	splice_donor_variant&intron_variant|NTN4|	0	0	0	0	0	0	0
chr11	103366791	CGATGT	C	STAB2	0.000564972	0	1	frameshift_variant|STAB2|p.Cys664fs	0	0	1	0	0	0	1
chr11	103496770	GTCTGC	G	ENSMMUG00000031594	0.000564972	0	1	frameshift_variant|ENSMMUG00000031594|p.Ala267fs	0	0	0	0	0	0	0
chr11	103703244	G	A	GLT8D2	0.000564972	0	1	stop_gained|GLT8D2|p.Arg139*	0	0	0	0	0	0	0
chr11	104764504	CT	C	ALDH1L2	0.000564972	0	1	splice_acceptor_variant&intron_variant|ALDH1L2|	0	0	0	0	0	0	0
chr11	106679141	C	T	CRY1	0.000564972	0	1	splice_donor_variant&intron_variant|CRY1|	0	0	0	0	0	0	0
chr11	109129087	C	T	UBE3B	0.000564972	0	1	stop_gained|UBE3B|p.Arg155*	0	0	0	0	0	0	0
chr11	109555641	GA	G	TCHP	0.000564972	0	1	frameshift_variant|TCHP|p.Lys174fs	0	0	0	0	0	0	0
chr11	109686780	G	T	ANKRD13A	0.000564972	0	1	stop_gained|ANKRD13A|p.Glu665*	0	0	0	0	0	0	0
chr11	112632613	CA	C	OAS1	0.000564972	0	1	frameshift_variant|OAS1|p.Lys98fs	0	0	1	0	0	0	1
chr11	112679476	C	T	OAS3	0.000564972	0	1	stop_gained|OAS3|p.Gln668*	0	0	0	0	0	0	0
chr11	120592825	C	CTTGTT	SPPL3	0.000564972	0	1	splice_acceptor_variant&intron_variant|SPPL3|	0	0	0	0	0	0	0
chr11	122032705	C	A	LRRC43	0.000564972	0	1	stop_gained|LRRC43|p.Tyr175*	0	0	0	0	0	0	0
chr11	122102707	C	CCGAGCGCA	VPS33A	0.000564972	0	1	splice_acceptor_variant&intron_variant|VPS33A|	0	0	0	0	0	0	0
chr11	122116329	C	CTTCAA	VPS33A	0.000564972	0	1	splice_acceptor_variant&intron_variant|VPS33A|	0	0	0	0	0	0	0
chr11	122574547	A	AGG	HCAR1	0.000564972	0	1	frameshift_variant|HCAR1|p.Leu76fs	0	0	0	0	0	0	0
chr11	122725494	C	CGGCT	HIP1R	0.000564972	0	1	frameshift_variant|HIP1R|p.Thr755fs	0	0	0	0	0	0	0
chr11	122725501	C	CGG	HIP1R	0.000564972	0	1	frameshift_variant|HIP1R|p.Leu757fs	0	0	0	0	0	0	0
chr11	122725502	C	CTATGAGTA	HIP1R	0.000564972	0	1	frameshift_variant|HIP1R|p.Leu757fs	0	0	0	0	0	0	0
chr11	122725506	CA	C	HIP1R	0.000564972	0	1	frameshift_variant|HIP1R|p.Gln758fs	0	0	0	0	0	0	0
chr11	122725514	C	CACCCG	HIP1R	0.000564972	0	1	frameshift_variant|HIP1R|p.Leu761fs	0	0	0	0	0	0	0
chr11	122851274	C	CG	OGFOD2	0.000564972	0	1	frameshift_variant|OGFOD2|p.Glu270fs	0	0	1	0	0	0	1
chr11	123775624	G	GA	DNAH10	0.000564972	0	1	frameshift_variant|DNAH10|p.Arg2517fs	0	0	0	0	0	0	0
chr12	881826	ATTGT	A	PLEKHB2	0.000564972	0	1	frameshift_variant|PLEKHB2|p.Cys81fs	0	0	0	0	0	0	0
chr12	10123807	G	T	GLI2	0.000564972	0	1	stop_gained|GLI2|p.Ser267*	0	0	0	1	0	1	2
chr12	10936268	ACC	A	EPB41L5	0.000564972	0	1	frameshift_variant|EPB41L5|p.Arg664fs	0	0	0	1	0	0	1
chr12	20149039	G	GT	MAP3K19	0.000564972	0	1	frameshift_variant|MAP3K19|p.Thr713fs	0	0	1	0	0	0	1
chr12	20406229	G	A	ZRANB3	0.000564972	0	1	stop_gained|ZRANB3|p.Arg569*	0	0	0	0	0	0	0
chr12	20509572	C	CA	ZRANB3	0.000564972	0	1	frameshift_variant|ZRANB3|p.Trp259fs	0	0	0	0	0	0	0
chr12	35091948	G	T	ACVR2A	0.000564972	0	1	stop_gained|ACVR2A|p.Glu434*	0	0	1	1	0	0	2
chr12	46835786	C	T	ENSMMUG00000020721	0.000564972	0	1	stop_gained|ENSMMUG00000020721|p.Trp1756*	0	0	0	0	0	0	0
chr12	47020141	GAA	G	PLA2R1	0.000564972	0	1	frameshift_variant|PLA2R1|p.Leu1030fs	0	0	0	0	0	0	0
chr12	47020146	C	CTTCGCCTT	PLA2R1	0.000564972	0	1	frameshift_variant|PLA2R1|p.Gly1029fs	0	0	0	0	0	0	0
chr12	47020148	AAT	A	PLA2R1	0.000564972	0	1	frameshift_variant|PLA2R1|p.Ile1028fs	0	0	0	0	0	0	0
chr12	47020162	CA	C	PLA2R1	0.000564972	0	1	frameshift_variant|PLA2R1|p.Ala1024fs	0	0	0	0	0	0	0
chr12	47020167	T	TGTGACGGG	PLA2R1	0.000564972	0	1	frameshift_variant|PLA2R1|p.Tyr1022fs	0	0	0	0	0	0	0
chr12	47020171	T	TATTG	PLA2R1	0.000564972	0	1	frameshift_variant|PLA2R1|p.Lys1021fs	0	0	0	0	0	0	0
chr12	47020174	AT	A	PLA2R1	0.000564972	0	1	frameshift_variant&splice_region_variant|PLA2R1|p.Ser1020fs	0	0	0	0	0	0	0
chr12	51831966	C	A	COBLL1	0.000564972	0	1	stop_gained|COBLL1|p.Glu1171*	0	0	0	0	0	0	0
chr12	57365561	G	GA	MYO3B	0.000564972	0	1	frameshift_variant|MYO3B|p.Ile241fs	0	0	0	0	0	0	0
chr12	57365568	GCTATTGAA	G	MYO3B	0.000564972	0	1	frameshift_variant|MYO3B|p.Ile244fs	0	0	0	0	0	0	0
chr12	65608896	AC	A	FKBP7	0.000564972	0	1	splice_donor_variant&intron_variant|FKBP7|	0	0	0	0	0	0	0
chr12	66081172	G	A	ENSMMUG00000019689	0.000564972	0	1	stop_gained|ENSMMUG00000019689|p.Gln273*	0	0	0	0	0	0	0
chr12	76960132	CA	C	ORMDL1	0.000564972	0	1	frameshift_variant|ORMDL1|p.Gly31fs	0	0	0	0	0	0	0
chr12	83042502	G	A	ENSMMUG00000064727	0.000564972	0	1	stop_gained|ENSMMUG00000064727|p.Gln87*	0	0	0	0	0	0	0
chr12	83912004	G	A	GTF3C3	0.000564972	0	1	stop_gained|GTF3C3|p.Arg255*	0	0	0	0	0	0	0
chr12	84016064	C	CTAA	PGAP1	0.000564972	0	1	splice_acceptor_variant&intron_variant|PGAP1|	0	0	0	1	0	0	1
chr12	87707376	C	T	AOX1	0.000564972	0	1	stop_gained|AOX1|p.Gln348*	0	0	1	0	0	0	1
chr12	87749476	G	T	AOX1	0.000564972	0	1	stop_gained|AOX1|p.Glu967*	0	0	1	0	0	0	1
chr12	88155343	TTCCTTCA	T	NIF3L1	0.000564972	0	1	frameshift_variant|NIF3L1|p.Ser26fs	0	0	0	0	0	0	0
chr12	88656752	G	A	TRAK2	0.000564972	0	1	stop_gained|TRAK2|p.Gln330*	0	0	0	0	0	0	0
chr12	89453876	A	G	KIAA2012	0.000564972	0	1	splice_acceptor_variant&intron_variant|KIAA2012|	0	0	0	0	0	0	0
chr12	89516220	C	CA	KIAA2012	0.000564972	0	1	frameshift_variant|KIAA2012|p.Thr811fs	0	0	0	0	0	0	0
chr12	89518204	T	TA	KIAA2012	0.000564972	0	1	frameshift_variant|KIAA2012|p.Leu842fs	0	0	0	0	0	0	0
chr12	94380955	TC	T	CPO	0.000564972	0	1	frameshift_variant|CPO|p.Lys99fs	0	0	0	0	0	0	0
chr12	96347611	CAT	C	ENSMMUG00000004941	0.000564972	0	1	frameshift_variant|ENSMMUG00000004941|p.Met174fs	0	0	0	0	0	0	0
chr12	105666120	TC	T	GPBAR1	0.000564972	0	1	frameshift_variant|GPBAR1|p.Arg308fs	0	0	1	0	0	0	1
chr12	106128308	A	G	STK36	0.000564972	0	1	splice_acceptor_variant&intron_variant|STK36|	0	0	1	1	0	0	2
chr12	112154152	TC	T	CCDC195	0.000564972	0	1	frameshift_variant|CCDC195|p.Gly44fs	0	0	0	0	0	0	0
chr12	114354868	A	C	RHBDD1	0.000564972	0	1	splice_acceptor_variant&intron_variant|RHBDD1|	0	0	0	0	0	0	0
chr12	117947119	A	C	SP100	0.000564972	0	1	splice_acceptor_variant&intron_variant|SP100|	0	0	0	0	0	0	0
chr12	119974095	TGTTTA	T	TIGD1	0.000564972	0	1	frameshift_variant|TIGD1|p.Lys180fs	0	0	0	0	0	0	0
chr12	121240674	C	CT	MROH2A	0.000564972	0	1	frameshift_variant|MROH2A|p.Lys170fs	0	0	0	0	0	0	0
chr12	121240678	A	AGATTG	MROH2A	0.000564972	0	1	frameshift_variant|MROH2A|p.Pro171fs	0	0	0	0	0	0	0
chr12	121240680	C	CTTGGT	MROH2A	0.000564972	0	1	frameshift_variant|MROH2A|p.Pro171fs	0	0	0	0	0	0	0
chr12	121240685	C	CCG	MROH2A	0.000564972	0	1	frameshift_variant|MROH2A|p.Asn173fs	0	0	0	0	0	0	0
chr12	121274834	C	T	MROH2A	0.000564972	0	1	stop_gained|MROH2A|p.Gln1346*	0	0	0	0	0	0	0
chr12	123747361	CAGTG	C	IQCA1	0.000564972	0	1	frameshift_variant|IQCA1|p.Thr776fs	0	0	0	0	0	0	0
chr12	128584870	A	AG	PPP1R7	0.000564972	0	1	frameshift_variant|PPP1R7|p.Asn306fs	0	0	0	0	0	0	0
chr12	128660291	G	T	HDLBP	0.000564972	0	1	stop_gained|HDLBP|p.Tyr1079*	0	0	0	0	0	0	0
chr13	452790	CG	C	GPAT2	0.000564972	0	1	frameshift_variant|GPAT2|p.Arg233fs	0	0	0	0	0	0	0
chr13	1179700	T	TG	ANKRD23	0.000564972	0	1	frameshift_variant|ANKRD23|p.Arg93fs	0	0	0	0	0	0	0
chr13	2966620	CAG	C	MITD1	0.000564972	0	1	frameshift_variant|MITD1|p.Leu182fs	0	0	0	0	0	0	0
chr13	6501682	T	TTC	MFSD9	0.000564972	0	1	frameshift_variant|MFSD9|p.Asn95fs	0	0	0	0	0	0	0
chr13	9808998	C	CT	ECRG4	0.000564972	0	1	frameshift_variant|ECRG4|p.Tyr89fs	0	0	0	0	0	0	0
chr13	11800137	CAG	C	SULT1C3	0.000564972	0	1	frameshift_variant|SULT1C3|p.Asn231fs	0	0	0	0	0	0	0
chr13	23082121	G	A	CAPG	0.000564972	0	1	stop_gained|CAPG|p.Trp394*	0	0	0	0	0	0	0
chr13	33058451	A	T	GCFC2	0.000564972	0	1	splice_acceptor_variant&intron_variant|GCFC2|	0	0	0	0	0	0	0
chr13	34133421	G	A	SEMA4F	0.000564972	0	1	stop_gained|SEMA4F|p.Gln348*	0	0	0	0	0	0	0
chr13	34680757	C	T	BOLA3	0.000564972	0	1	stop_gained|BOLA3|p.Arg46*	0	0	0	0	0	0	0
chr13	35080477	C	T	DUSP11	0.000564972	0	1	stop_gained|DUSP11|p.Arg283*	0	0	0	0	0	0	0
chr13	35202068	A	AG	ALMS1	0.000564972	0	1	frameshift_variant|ALMS1|p.Leu4109fs	0	1	0	0	0	0	1
chr13	38985726	C	A	ANXA4	0.000564972	0	1	splice_donor_variant&intron_variant|ANXA4|	0	0	1	0	0	0	1
chr13	40373658	C	T	PLEK	0.000564972	0	1	splice_acceptor_variant&intron_variant|PLEK|	0	0	0	0	0	0	0
chr13	41354980	A	AT	ETAA1	0.000564972	0	1	frameshift_variant|ETAA1|p.Asn800fs	0	0	0	0	0	0	0
chr13	47486340	T	A	USP34	0.000564972	0	1	stop_gained|USP34|p.Leu1200*	0	0	0	0	0	0	0
chr13	54341743	G	GT	C13H2orf73	0.000564972	0	1	frameshift_variant|C13H2orf73|p.Pro32fs	0	0	0	0	0	0	0
chr13	65203799	C	T	THADA	0.000564972	0	1	stop_gained|THADA|p.Gln10*	0	0	0	0	0	0	0
chr13	66477072	G	A	EML4	0.000564972	0	1	stop_gained|EML4|p.Arg808*	0	0	0	0	0	0	0
chr13	66506700	A	AAT	EML4	0.000564972	0	1	splice_donor_variant&intron_variant|EML4|	0	0	0	0	0	0	0
chr13	71554731	G	A	QPCT	0.000564972	0	1	stop_gained|QPCT|p.Arg133*	0	0	1	0	0	0	1
chr13	77700526	C	A	CAPN14	0.000564972	0	1	stop_gained|CAPN14|p.Cys266*	0	0	0	0	0	0	0
chr13	78127572	G	A	CAPN13	0.000564972	0	1	stop_gained|CAPN13|p.Trp293*	0	0	0	0	0	0	0
chr13	81838897	C	T	ABHD1	0.000564972	0	1	stop_gained|ABHD1|p.Trp232*	0	0	0	0	0	0	0
chr13	81839385	GCC	G	ABHD1	0.000564972	0	1	frameshift_variant|ABHD1|p.Gly161fs	0	0	0	0	0	0	0
chr13	82669998	T	TG	ADGRF3	0.000564972	0	1	frameshift_variant|ADGRF3|p.Val971fs	0	0	0	0	0	0	0
chr13	99328988	C	G	CPSF3	0.000564972	0	1	splice_acceptor_variant&intron_variant|CPSF3|	0	0	0	0	1	0	1
chr14	197849	AG	A	RIC8A	0.000564972	0	1	frameshift_variant|RIC8A|p.Ser32fs	0	0	0	1	0	0	1
chr14	671068	A	G	IRF7	0.000564972	0	1	splice_donor_variant&intron_variant|IRF7|	0	0	0	0	0	0	0
chr14	3350801	C	T	ZNF195	0.000564972	0	1	splice_donor_variant&intron_variant|ZNF195|	0	0	0	0	0	0	0
chr14	6541289	C	T	ENSMMUG00000042838	0.000564972	0	1	stop_gained|ENSMMUG00000042838|p.Arg67*	0	0	0	0	0	0	0
chr14	6541448	C	T	ENSMMUG00000042838	0.000564972	0	1	stop_gained|ENSMMUG00000042838|p.Arg120*	0	0	0	0	0	0	0
chr14	6759589	GC	G	ALDH3B1	0.000564972	0	1	frameshift_variant|ALDH3B1|p.Gln236fs	0	0	1	0	0	0	1
chr14	6896747	G	A	NUDT8	0.000564972	0	1	stop_gained|NUDT8|p.Trp100*	0	0	0	0	0	0	0
chr14	7234768	G	A	ANKRD13D	0.000564972	0	1	stop_gained|ANKRD13D|p.Arg155*	0	0	0	0	0	0	0
chr14	7990772	C	A	ACTN3	0.000564972	0	1	stop_gained|ACTN3|p.Glu358*	0	0	0	0	0	0	0
chr14	8216668	G	GA	BRMS1	0.000564972	0	1	frameshift_variant|BRMS1|p.Gly47fs	0	0	0	0	0	0	0
chr14	8707538	G	A	SNX32	0.000564972	0	1	stop_gained|SNX32|p.Arg223*	0	0	0	0	0	0	0
chr14	8931726	C	CA	KCNK7	0.000564972	0	1	frameshift_variant|KCNK7|p.Ser149fs	0	0	0	0	0	0	0
chr14	8943170	AGT	A	EHBP1L1	0.000564972	0	1	frameshift_variant|EHBP1L1|p.Leu670fs	0	0	0	0	0	0	0
chr14	8943174	C	CAT	EHBP1L1	0.000564972	0	1	frameshift_variant|EHBP1L1|p.Ala669fs	0	0	0	0	0	0	0
chr14	8987927	GGGCCT	G	LTBP3	0.000564972	0	1	frameshift_variant|LTBP3|p.Ala1053fs	0	1	0	1	0	0	2
chr14	8989365	TAC	T	ENSMMUG00000023477	0.000564972	0	1	splice_donor_variant&intron_variant|ENSMMUG00000023477|	0	0	0	0	0	0	0
chr14	9314485	C	A	CAPN1	0.000564972	0	1	splice_acceptor_variant&intron_variant|CAPN1|	0	0	1	0	0	0	1
chr14	9490236	G	GCA	SAC3D1	0.000564972	0	1	frameshift_variant|SAC3D1|p.Arg109fs	0	0	0	0	0	0	0
chr14	9490245	G	A	SAC3D1	0.000564972	0	1	stop_gained|SAC3D1|p.Arg106*	0	0	0	0	0	0	0
chr14	9704106	G	A	CDC42BPG	0.000564972	0	1	splice_donor_variant&intron_variant|CDC42BPG|	0	0	1	0	0	0	1
chr14	11312841	C	T	SLC3A2	0.000564972	0	1	stop_gained|SLC3A2|p.Trp337*	0	0	0	1	0	0	1
chr14	11404939	GTCTTC	G	TMEM223	0.000564972	0	1	frameshift_variant|TMEM223|p.Phe116fs	0	0	0	0	0	0	0
chr14	11669654	GGA	G	AHNAK	0.000564972	0	1	frameshift_variant|AHNAK|p.Gly639fs	0	0	0	0	0	0	0
chr14	11669658	CCT	C	AHNAK	0.000564972	0	1	frameshift_variant|AHNAK|p.Leu641fs	0	0	0	0	0	0	0
chr14	11669664	C	CA	AHNAK	0.000564972	0	1	frameshift_variant|AHNAK|p.Gly643fs	0	0	0	0	0	0	0
chr14	12245895	G	A	FADS3	0.000564972	0	1	stop_gained|FADS3|p.Trp356*	0	0	0	0	0	0	0
chr14	12871816	T	C	DDB1	0.000564972	0	1	splice_donor_variant&intron_variant|DDB1|	0	0	0	1	1	0	2
chr14	13870078	C	T	MS4A4A	0.000564972	0	1	splice_donor_variant&intron_variant|MS4A4A|	0	0	0	0	0	0	0
chr14	14335942	T	A	PATL1	0.000564972	0	1	splice_donor_variant&intron_variant|PATL1|	0	0	0	0	0	0	0
chr14	14495650	CGAAGT	C	OR4D6	0.000564972	0	1	frameshift_variant|OR4D6|p.His250fs	0	0	0	0	0	0	0
chr14	18602718	C	T	CSTPP1	0.000564972	0	1	splice_donor_variant&intron_variant|CSTPP1|	0	0	0	0	0	0	0
chr14	19058164	C	T	ZNF408	0.000564972	0	1	splice_acceptor_variant&intron_variant|ZNF408|	0	0	0	0	0	0	0
chr14	19846212	C	T	LARGE2	0.000564972	0	1	stop_gained|LARGE2|p.Trp577*	0	0	0	0	0	0	0
chr14	21669418	C	CAGGT	EXT2	0.000564972	0	1	frameshift_variant|EXT2|p.Trp124fs	1	0	0	1	0	1	3
chr14	32428545	G	A	DEPDC7	0.000564972	0	1	stop_gained|DEPDC7|p.Gln199*	0	0	0	0	0	0	0
chr14	32613774	C	A	PRRG4	0.000564972	0	1	stop_gained|PRRG4|p.Gly132*	0	0	0	0	0	0	0
chr14	32819600	G	GA	CCDC73	0.000564972	0	1	frameshift_variant|CCDC73|p.Ser465fs	0	0	0	0	0	0	0
chr14	34149574	G	GAATAT	ENSMMUG00000049710	0.000564972	0	1	frameshift_variant|ENSMMUG00000049710|p.Leu341fs	0	0	0	0	0	0	0
chr14	34149586	A	AGG	ENSMMUG00000049710	0.000564972	0	1	frameshift_variant|ENSMMUG00000049710|p.Pro344fs	0	0	0	0	0	0	0
chr14	34149591	C	CTTTAG	ENSMMUG00000049710	0.000564972	0	1	frameshift_variant|ENSMMUG00000049710|p.Arg346fs	0	0	0	0	0	0	0
chr14	34496274	G	GT	ENSMMUG00000006842	0.000564972	0	1	frameshift_variant&stop_gained|ENSMMUG00000006842|p.Asp375fs	0	0	0	0	0	0	0
chr14	37098927	G	GGA	METTL15	0.000564972	0	1	frameshift_variant|METTL15|p.Phe321fs	0	0	0	0	0	0	0
chr14	45211262	GT	G	PRMT3	0.000564972	0	1	frameshift_variant|PRMT3|p.Asn91fs	0	0	1	0	0	0	1
chr14	47035530	CCA	C	UEVLD	0.000564972	0	1	frameshift_variant|UEVLD|p.Leu447fs	0	0	0	0	0	0	0
chr14	47421873	G	GCGTA	MRGPRX4	0.000564972	0	1	frameshift_variant|MRGPRX4|p.Arg58fs	0	0	0	0	0	0	0
chr14	50818402	G	A	PDE3B	0.000564972	0	1	stop_gained|PDE3B|p.Gln649*	0	0	1	0	0	0	1
chr14	56758591	CTG	C	C14H11orf16	0.000564972	0	1	frameshift_variant|C14H11orf16|p.Cys282fs	0	0	0	0	0	0	0
chr14	58030528	T	A	OVCH2	0.000564972	0	1	stop_gained|OVCH2|p.Cys162*	0	0	0	0	0	0	0
chr14	58097829	AT	A	PPFIBP2	0.000564972	0	1	frameshift_variant|PPFIBP2|p.Asp478fs	0	0	0	0	0	0	0
chr14	59372955	A	T	DNHD1	0.000564972	0	1	stop_gained|DNHD1|p.Tyr4116*	0	0	0	0	0	0	0
chr14	59484923	C	CAAAGA	TRIM3	0.000564972	0	1	frameshift_variant|TRIM3|p.Asp349fs	0	0	0	0	0	0	0
chr14	63908154	AC	A	OR51E2	0.000564972	0	1	frameshift_variant|OR51E2|p.Cys286fs	0	0	0	0	0	0	0
chr14	70267673	C	T	MYO7A	0.000564972	0	1	stop_gained|MYO7A|p.Gln1699*	1	0	0	0	0	0	1
chr14	79117716	C	T	CCDC83	0.000564972	0	1	stop_gained|CCDC83|p.Gln68*	0	0	0	0	0	0	0
chr14	86633934	T	C	DEUP1	0.000564972	0	1	splice_donor_variant&intron_variant|DEUP1|	0	0	0	0	0	0	0
chr14	86985318	GGC	G	CEP295	0.000564972	0	1	frameshift_variant|CEP295|p.Arg2022fs	0	0	0	0	0	0	0
chr14	87079939	AGG	A	VSTM5	0.000564972	0	1	frameshift_variant|VSTM5|p.Leu36fs	0	0	0	0	0	0	0
chr14	95173357	CT	C	ANGPTL5	0.000564972	0	1	frameshift_variant|ANGPTL5|p.Lys229fs	0	0	0	0	0	0	0
chr14	95974467	A	AT	MMP27	0.000564972	0	1	frameshift_variant&start_lost|MMP27|p.Met1fs	0	0	1	0	0	0	1
chr14	96050265	A	T	MMP10	0.000564972	0	1	stop_gained|MMP10|p.Tyr312*	0	0	1	0	0	0	1
chr14	96054598	G	A	MMP10	0.000564972	0	1	stop_gained|MMP10|p.Gln64*	0	0	1	0	0	0	1
chr14	104632794	C	T	BTG4	0.000564972	0	1	stop_gained|BTG4|p.Trp95*	0	0	0	0	0	0	0
chr14	105337510	G	A	BCO2	0.000564972	0	1	stop_gained|BCO2|p.Trp202*	0	0	0	0	0	0	0
chr14	105407425	G	C	PLET1	0.000564972	0	1	stop_gained|PLET1|p.Tyr30*	0	0	0	0	0	0	0
chr14	107096389	C	T	HTR3B	0.000564972	0	1	stop_gained|HTR3B|p.Arg343*	0	0	1	0	0	0	1
chr14	109882287	GC	G	APOA4	0.000564972	0	1	frameshift_variant|APOA4|p.Gln132fs	0	0	1	0	0	0	1
chr14	111598332	C	G	TMEM25	0.000564972	0	1	stop_gained&splice_region_variant|TMEM25|p.Ser23*	0	0	0	0	0	0	0
chr14	111737862	TC	T	TREH	0.000564972	0	1	frameshift_variant|TREH|p.Glu306fs	0	0	0	0	0	0	0
chr14	111740028	C	T	TREH	0.000564972	0	1	stop_gained|TREH|p.Trp135*	0	0	0	0	0	0	0
chr14	112026211	G	T	UPK2	0.000564972	0	1	stop_gained|UPK2|p.Gly55*	0	0	0	1	0	0	1
chr14	112027427	G	GCC	UPK2	0.000564972	0	1	frameshift_variant|UPK2|p.Leu172fs	0	0	0	1	0	0	1
chr14	112027431	GGCTT	G	UPK2	0.000564972	0	1	frameshift_variant|UPK2|p.Gly173fs	0	0	0	1	0	0	1
chr14	112444680	GC	G	USP2	0.000564972	0	1	frameshift_variant|USP2|p.Arg168fs	0	0	0	0	0	0	0
chr14	114053456	G	A	GRIK4	0.000564972	0	1	splice_donor_variant&intron_variant|GRIK4|	0	0	1	0	0	0	1
chr14	116038050	CTG	C	HSPA8	0.000564972	0	1	frameshift_variant|HSPA8|p.Thr66fs	0	0	1	0	0	0	1
chr14	117349404	A	ACC	OR8A1	0.000564972	0	1	frameshift_variant|OR8A1|p.Asn310fs	0	0	0	0	0	0	0
chr14	117530202	TCAC	T	VSIG2	0.000564972	0	1	splice_donor_variant&splice_region_variant&intron_variant|VSIG2|	0	1	0	0	0	0	1
chr14	117648700	C	T	ROBO3	0.000564972	0	1	stop_gained|ROBO3|p.Gln799*	0	1	0	1	0	0	2
chr14	117756154	C	T	CCDC15	0.000564972	0	1	stop_gained|CCDC15|p.Gln381*	0	0	0	0	0	0	0
chr14	118528877	G	A	PATE1	0.000564972	0	1	splice_donor_variant&intron_variant|PATE1|	0	0	0	0	0	0	0
chr14	118721244	T	G	VSIG10L2	0.000564972	0	1	splice_donor_variant&intron_variant|VSIG10L2|	0	0	0	0	0	0	0
chr14	122554367	TC	T	NFRKB	0.000564972	0	1	frameshift_variant|NFRKB|p.Glu205fs	0	0	0	0	0	0	0
chr15	1463592	G	T	LCN15	0.000564972	0	1	splice_donor_variant&intron_variant|LCN15|	0	0	0	0	0	0	0
chr15	4604405	G	C	DBH	0.000564972	0	1	stop_gained|DBH|p.Tyr314*	0	1	1	1	0	0	3
chr15	4905681	C	CAGAGCACA	SURF1	0.000564972	0	1	splice_donor_variant&intron_variant|SURF1|	0	1	0	1	0	0	2
chr15	4926991	GGC	G	SURF6	0.000564972	0	1	frameshift_variant|SURF6|p.Gln314fs	0	0	0	0	0	0	0
chr15	7259268	G	A	RALGDS	0.000564972	0	1	splice_donor_variant&intron_variant|RALGDS|	0	0	0	0	0	0	0
chr15	8949201	GATGAAGCC	G	PRRC2B	0.000564972	0	1	frameshift_variant|PRRC2B|p.Gly1561fs	0	0	0	0	0	0	0
chr15	8949211	TCGCC	T	PRRC2B	0.000564972	0	1	frameshift_variant|PRRC2B|p.Gly1559fs	0	0	0	0	0	0	0
chr15	11848843	CT	C	ZDHHC12	0.000564972	0	1	frameshift_variant|ZDHHC12|p.Trp129fs	0	0	0	0	0	0	0
chr15	13210138	C	T	SLC2A8	0.000564972	0	1	splice_acceptor_variant&intron_variant|SLC2A8|	0	0	0	1	0	0	1
chr15	16228432	C	G	ADGRD2	0.000564972	0	1	splice_donor_variant&intron_variant|ADGRD2|	0	0	0	0	0	0	0
chr15	17823893	T	C	RC3H2	0.000564972	0	1	splice_donor_variant&intron_variant|RC3H2|	0	0	0	0	0	0	0
chr15	21796836	CTACAGGTGG	C	TRAF1	0.000564972	0	1	frameshift_variant&splice_acceptor_variant&splice_region_variant&intron_variant|TRAF1|p.Val236fs	0	0	0	0	0	0	0
chr15	21840302	C	T	PHF19	0.000564972	0	1	stop_gained|PHF19|p.Gln145*	0	0	0	0	0	0	0
chr15	28492749	AG	A	AKNA	0.000564972	0	1	frameshift_variant|AKNA|p.Glu789fs	0	0	0	0	0	0	0
chr15	29787842	AG	A	ZFP37	0.000564972	0	1	frameshift_variant|ZFP37|p.Glu114fs	0	0	0	0	0	0	0
chr15	29792940	GA	G	ZFP37	0.000564972	0	1	frameshift_variant|ZFP37|p.Ile184fs	0	0	0	0	0	0	0
chr15	31321840	A	G	ENSMMUG00000031944	0.000564972	0	1	splice_acceptor_variant&intron_variant|ENSMMUG00000031944|	0	0	0	0	0	0	0
chr15	38752252	GTC	G	SMC2	0.000564972	0	1	frameshift_variant|SMC2|p.Arg945fs	0	0	0	0	1	0	1
chr15	45004803	C	T	TRMO	0.000564972	0	1	stop_gained|TRMO|p.Gln49*	0	0	0	0	0	0	0
chr15	45292999	G	GCC	TSTD2	0.000564972	0	1	splice_donor_variant&intron_variant|TSTD2|	0	0	0	0	0	0	0
chr15	45310406	G	GAATCCATT	TSTD2	0.000564972	0	1	splice_donor_variant&intron_variant|TSTD2|	0	0	0	0	0	0	0
chr15	45714040	AT	A	ALDH1B1	0.000564972	0	1	frameshift_variant|ALDH1B1|p.Asp297fs	0	0	1	0	0	0	1
chr15	46223160	G	GT	SLC25A51	0.000564972	0	1	frameshift_variant|SLC25A51|p.Pro231fs	0	0	0	0	0	0	0
chr15	47981335	GA	G	CCIN	0.000564972	0	1	frameshift_variant|CCIN|p.Ser324fs	0	0	0	0	0	0	0
chr15	48395743	G	T	SPAG8	0.000564972	0	1	stop_gained|SPAG8|p.Gly341*	0	0	0	0	0	0	0
chr15	49323207	C	T	FAM205C	0.000564972	0	1	stop_gained|FAM205C|p.Arg204*	0	0	0	0	0	0	0
chr15	49883427	G	A	KIF24	0.000564972	0	1	stop_gained|KIF24|p.Trp218*	0	0	0	0	0	0	0
chr15	49933265	C	CA	KIF24	0.000564972	0	1	frameshift_variant|KIF24|p.Arg960fs	0	0	0	0	0	0	0
chr15	50444214	G	A	AQP3	0.000564972	0	1	splice_donor_variant&intron_variant|AQP3|	0	0	1	0	0	0	1
chr15	50503919	G	A	ENSMMUG00000001545	0.000564972	0	1	splice_donor_variant&intron_variant|ENSMMUG00000001545|	0	0	0	0	0	0	0
chr15	66140914	C	A	CNTLN	0.000564972	0	1	splice_donor_variant&intron_variant|CNTLN|	0	0	0	0	0	0	0
chr15	77210420	GC	G	GLDC	0.000564972	0	1	frameshift_variant|GLDC|p.Pro667fs	0	1	1	0	0	0	2
chr15	77843206	AG	A	KIAA2026	0.000564972	0	1	frameshift_variant|KIAA2026|p.Asp1298fs	0	0	0	0	0	0	0
chr15	78447493	CAG	C	ENSMMUG00000057739	0.000564972	0	1	frameshift_variant|ENSMMUG00000057739|p.Glu43fs	0	0	0	0	0	0	0
chr15	79205663	G	A	SPATA6L	0.000564972	0	1	splice_acceptor_variant&intron_variant|SPATA6L|	0	0	0	0	0	0	0
chr15	99610907	C	CA	SLC28A3	0.000564972	0	1	frameshift_variant|SLC28A3|p.Ser463fs	0	0	0	0	0	0	0
chr15	100944751	ATC	A	AGTPBP1	0.000564972	0	1	frameshift_variant|AGTPBP1|p.Asp604fs	0	0	0	0	0	0	0
chr15	101427089	TCG	T	ISCA1	0.000564972	0	1	frameshift_variant|ISCA1|p.Arg53fs	0	0	0	0	0	0	0
chr15	108407692	T	TC	FAM120AOS	0.000564972	0	1	splice_acceptor_variant&intron_variant|FAM120AOS|	0	0	0	0	0	0	0
chr15	108409544	CT	C	FAM120AOS	0.000564972	0	1	frameshift_variant|FAM120AOS|p.Ile87fs	0	0	0	0	0	0	0
chr15	108409722	TG	T	FAM120AOS	0.000564972	0	1	frameshift_variant|FAM120AOS|p.Thr30fs	0	0	0	0	0	0	0
chr15	110759404	G	A	FAM240B	0.000564972	0	1	splice_acceptor_variant&intron_variant|FAM240B|	0	0	0	0	0	0	0
chr15	111503138	C	T	SLC35D2	0.000564972	0	1	stop_gained|SLC35D2|p.Arg291*	0	0	0	0	0	0	0
chr16	1587581	G	GTAC	WDR81	0.000564972	0	1	splice_donor_variant&intron_variant|WDR81|	0	0	0	0	0	0	0
chr16	2185008	G	C	SRR	0.000564972	0	1	splice_acceptor_variant&intron_variant|SRR|	0	0	1	0	0	0	1
chr16	3506353	CTAAG	C	HASPIN	0.000564972	0	1	frameshift_variant|HASPIN|p.Ser453fs	0	0	1	0	0	0	1
chr16	3861964	T	C	ZZEF1	0.000564972	0	1	splice_acceptor_variant&intron_variant|ZZEF1|	0	0	0	0	0	0	0
chr16	4420822	CAGGA	C	SMTNL2	0.000564972	0	1	frameshift_variant|SMTNL2|p.Glu325fs	0	0	0	0	0	0	0
chr16	4642237	CA	C	PLD2	0.000564972	0	1	frameshift_variant|PLD2|p.Ser329fs	0	0	1	0	0	0	1
chr16	4838844	C	A	INCA1	0.000564972	0	1	stop_gained|INCA1|p.Glu238*	0	0	0	0	0	0	0
chr16	5264859	CA	C	DHX33	0.000564972	0	1	frameshift_variant|DHX33|p.Val91fs	0	0	0	0	1	0	1
chr16	5264861	CT	C	DHX33	0.000564972	0	1	frameshift_variant|DHX33|p.Val91fs	0	0	0	0	1	0	1
chr16	5360834	GA	G	NLRP1	0.000564972	0	1	frameshift_variant|NLRP1|p.Ile219fs	0	0	0	0	0	0	0
chr16	6763609	G	T	ALOX12	0.000564972	0	1	stop_gained|ALOX12|p.Gly412*	0	0	0	0	0	0	0
chr16	6795930	A	ATCTGAGG	SLC16A13	0.000564972	0	1	frameshift_variant|SLC16A13|p.Thr220fs	0	0	0	0	0	0	0
chr16	6830685	AG	A	CLEC10A	0.000564972	0	1	frameshift_variant|CLEC10A|p.Cys267fs	0	1	0	0	0	0	1
chr16	7118202	T	G	ACAP1	0.000564972	0	1	splice_donor_variant&intron_variant|ACAP1|	0	0	0	0	0	0	0
chr16	7406176	T	C	SAT2	0.000564972	0	1	splice_acceptor_variant&intron_variant|SAT2|	0	0	0	0	0	0	0
chr16	7555140	G	A	DNAH2	0.000564972	0	1	splice_donor_variant&intron_variant|DNAH2|	0	0	0	0	0	0	0
chr16	8028421	GT	G	CTC1	0.000564972	0	1	frameshift_variant|CTC1|p.Asn180fs	0	0	0	0	0	0	0
chr16	10244337	C	A	MYH4	0.000564972	0	1	stop_gained|MYH4|p.Glu1349*	0	0	0	0	0	0	0
chr16	11586931	T	TGAAGGGG	DNAH9	0.000564972	0	1	frameshift_variant|DNAH9|p.Phe2728fs	0	0	0	0	0	0	0
chr16	17982661	AG	A	MYO15A	0.000564972	0	1	splice_acceptor_variant&intron_variant|MYO15A|	0	1	0	0	0	0	1
chr16	17999308	A	C	MYO15A	0.000564972	0	1	splice_acceptor_variant&intron_variant|MYO15A|	0	1	0	0	0	0	1
chr16	18113388	TG	T	MIEF2	0.000564972	0	1	frameshift_variant|MIEF2|p.Arg237fs	0	0	0	0	0	0	0
chr16	18141476	G	A	TOP3A	0.000564972	0	1	stop_gained|TOP3A|p.Gln431*	0	0	0	1	0	0	1
chr16	23988594	G	A	VTN	0.000564972	0	1	stop_gained|VTN|p.Gln61*	0	0	1	0	0	0	1
chr16	24235645	C	A	RSKR	0.000564972	0	1	splice_acceptor_variant&intron_variant|RSKR|	0	0	0	0	0	0	0
chr16	27544214	CAGTA	C	OMG	0.000564972	0	1	frameshift_variant|OMG|p.Leu238fs	0	0	0	0	0	0	0
chr16	31901318	G	A	SLFN14	0.000564972	0	1	stop_gained|SLFN14|p.Gln171*	0	0	0	0	0	0	0
chr16	32287367	C	T	RDM1	0.000564972	0	1	stop_gained|RDM1|p.Trp20*	0	0	0	0	0	0	0
chr16	33676370	G	A	TADA2A	0.000564972	0	1	stop_gained|TADA2A|p.Arg18*	0	0	0	0	0	0	0
chr16	33727361	A	G	C16H17orf78	0.000564972	0	1	splice_donor_variant&intron_variant|C16H17orf78|	0	0	0	0	0	0	0
chr16	33986814	T	TCCCGCGCC	ACACA	0.000564972	0	1	frameshift_variant|ACACA|p.Phe2005fs	0	0	1	1	0	0	2
chr16	34614416	GTTCC	G	MYO19	0.000564972	0	1	frameshift_variant|MYO19|p.Phe383fs	0	0	0	0	0	0	0
chr16	34631891	ACT	A	ENSMMUG00000007918	0.000564972	0	1	frameshift_variant|ENSMMUG00000007918|p.Arg86fs	0	0	0	0	0	0	0
chr16	34722404	TAATA	T	ENSMMUG00000017113	0.000564972	0	1	frameshift_variant|ENSMMUG00000017113|p.Ile1506fs	0	0	0	0	0	0	0
chr16	35225031	CAT	C	PPM1D	0.000564972	0	1	frameshift_variant|PPM1D|p.His550fs	0	0	0	1	0	0	1
chr16	36836381	T	A	RNFT1	0.000564972	0	1	stop_gained|RNFT1|p.Leu235*	0	0	0	0	0	0	0
chr16	38298548	T	TCA	MTMR4	0.000564972	0	1	frameshift_variant|MTMR4|p.Glu312fs	0	0	0	0	0	0	0
chr16	38549718	G	A	LPO	0.000564972	0	1	stop_gained|LPO|p.Arg294*	0	0	0	0	0	0	0
chr16	38648783	AT	A	OR4D1	0.000564972	0	1	frameshift_variant|OR4D1|p.Tyr73fs	0	0	0	0	0	0	0
chr16	39813039	C	T	SCPEP1	0.000564972	0	1	splice_acceptor_variant&intron_variant|SCPEP1|	0	0	1	0	0	0	1
chr16	39835146	TA	T	SCPEP1	0.000564972	0	1	frameshift_variant|SCPEP1|p.Tyr56fs	0	0	1	0	0	0	1
chr16	41072671	G	GAA	TMEM100	0.000564972	0	1	frameshift_variant|TMEM100|p.Gly11fs	0	0	0	1	0	0	1
chr16	46694957	AC	A	PDK2	0.000564972	0	1	frameshift_variant|PDK2|p.Val59fs	0	0	1	0	0	0	1
chr16	46717222	G	A	ITGA3	0.000564972	0	1	stop_gained|ITGA3|p.Arg508*	0	0	0	1	0	0	1
chr16	51950840	G	T	KRT28	0.000564972	0	1	stop_gained|KRT28|p.Ser287*	0	0	0	0	0	0	0
chr16	51953457	TC	T	KRT28	0.000564972	0	1	frameshift_variant|KRT28|p.Gly80fs	0	0	0	0	0	0	0
chr16	52548571	GCT	G	KRT37	0.000564972	0	1	frameshift_variant|KRT37|p.Glu131fs	0	0	0	0	0	0	0
chr16	53619633	T	TGACTGTAA	ATP6V0A1	0.000564972	0	1	frameshift_variant&stop_gained|ATP6V0A1|p.Asn211fs	0	0	1	0	0	0	1
chr16	54145018	C	CGCTGAATG	IFI35	0.000564972	0	1	frameshift_variant&stop_gained&splice_region_variant|IFI35|p.Ala7fs	0	0	0	0	0	0	0
chr16	54152865	GTCTC	G	IFI35	0.000564972	0	1	frameshift_variant|IFI35|p.Ser212fs	0	0	0	0	0	0	0
chr16	54331626	C	T	TMEM106A	0.000564972	0	1	stop_gained|TMEM106A|p.Gln75*	0	0	0	0	0	0	0
chr16	55330782	AGCCTT	A	G6PC3	0.000564972	0	1	frameshift_variant|G6PC3|p.Ala231fs	0	1	0	0	0	0	1
chr16	55343453	AGGATCT	A	HDAC5	0.000564972	0	1	frameshift_variant&splice_acceptor_variant&splice_region_variant&intron_variant|HDAC5|p.Ile535fs	0	0	0	0	0	0	0
chr16	55515318	G	GATCCAGCA	SLC4A1	0.000564972	0	1	frameshift_variant|SLC4A1|p.Leu709fs	1	0	0	1	0	0	2
chr16	56001141	A	T	DBF4B	0.000564972	0	1	stop_gained|DBF4B|p.Lys236*	0	0	0	0	0	0	0
chr16	56358094	G	GGC	NMT1	0.000564972	0	1	splice_donor_variant&intron_variant|NMT1|	0	0	1	1	1	0	3
chr16	57644564	C	CCTGG	SPPL2C	0.000564972	0	1	frameshift_variant|SPPL2C|p.Val514fs	0	0	0	0	0	0	0
chr16	58810709	G	A	EFCAB3	0.000564972	0	1	splice_donor_variant&intron_variant|EFCAB3|	0	0	0	0	0	0	0
chr16	59180338	A	AGCTG	MARCHF10	0.000564972	0	1	frameshift_variant|MARCHF10|p.Gly470fs	0	0	0	0	0	0	0
chr16	60504236	ATCT	A	SCN4A	0.000564972	0	1	frameshift_variant&splice_donor_variant&splice_region_variant&intron_variant|SCN4A|p.Lys1304fs	1	0	1	1	0	0	3
chr16	61067315	G	A	CEP95	0.000564972	0	1	splice_acceptor_variant&intron_variant|CEP95|	0	0	0	0	0	0	0
chr16	61932157	T	A	AXIN2	0.000564972	0	1	stop_gained|AXIN2|p.Lys661*	1	0	0	1	0	0	2
chr16	62608776	CA	C	APOH	0.000564972	0	1	frameshift_variant|APOH|p.Phe127fs	0	0	1	1	0	0	2
chr16	64607754	G	A	AMZ2	0.000564972	0	1	stop_gained|AMZ2|p.Trp188*	0	0	0	0	0	0	0
chr16	65215669	TC	T	ABCA8	0.000564972	0	1	frameshift_variant|ABCA8|p.Gly1225fs	0	0	0	0	0	0	0
chr16	65258821	TA	T	ABCA8	0.000564972	0	1	frameshift_variant|ABCA8|p.Ile496fs	0	0	0	0	0	0	0
chr16	65318555	G	A	ABCA9	0.000564972	0	1	stop_gained|ABCA9|p.Arg1221*	0	0	0	0	0	0	0
chr16	65344521	CT	C	ABCA9	0.000564972	0	1	frameshift_variant|ABCA9|p.Gln732fs	0	0	0	0	0	0	0
chr16	69552968	CAA	C	C16H17orf80	0.000564972	0	1	frameshift_variant|C16H17orf80|p.Gln297fs	0	0	0	0	0	0	0
chr16	69577917	G	C	CPSF4L	0.000564972	0	1	stop_gained|CPSF4L|p.Ser38*	0	0	0	0	0	0	0
chr16	70572305	C	CT	TTYH2	0.000564972	0	1	frameshift_variant|TTYH2|p.Lys172fs	0	0	0	0	0	0	0
chr16	71081799	C	T	RAB37	0.000564972	0	1	stop_gained|RAB37|p.Arg123*	0	0	0	0	0	0	0
chr16	71270775	TCCAAATC	T	OTOP3	0.000564972	0	1	frameshift_variant|OTOP3|p.Phe357fs	0	0	0	0	0	0	0
chr16	71270788	CAGTGG	C	OTOP3	0.000564972	0	1	frameshift_variant|OTOP3|p.Ser362fs	0	0	0	0	0	0	0
chr16	71331061	C	CTGGCG	CDR2L	0.000564972	0	1	frameshift_variant|CDR2L|p.Glu189fs	0	0	0	0	0	0	0
chr16	76053681	G	A	ENPP7	0.000564972	0	1	stop_gained|ENPP7|p.Trp188*	0	0	0	0	0	0	0
chr16	78339656	ACGGC	A	LRRC45	0.000564972	0	1	frameshift_variant|LRRC45|p.Arg582fs	0	0	0	0	0	0	0
chr17	1703995	TAAGC	T	MICU2	0.000564972	0	1	frameshift_variant|MICU2|p.Leu165fs	0	0	0	0	0	0	0
chr17	4123327	A	T	SPATA13	0.000564972	0	1	splice_acceptor_variant&intron_variant|SPATA13|	0	0	0	0	0	0	0
chr17	10014206	G	T	TEX26	0.000564972	0	1	splice_donor_variant&intron_variant|TEX26|	0	0	0	0	0	0	0
chr17	11353162	C	T	BRCA2	0.000564972	0	1	stop_gained|BRCA2|p.Gln2458*	0	0	0	1	0	1	2
chr17	20082029	G	A	RGCC	0.000564972	0	1	splice_acceptor_variant&intron_variant|RGCC|	0	0	0	0	0	0	0
chr17	21483669	T	C	EPSTI1	0.000564972	0	1	splice_acceptor_variant&intron_variant|EPSTI1|	0	0	0	0	0	0	0
chr17	28166776	A	AATGTTTAT	KPNA3	0.000564972	0	1	frameshift_variant&stop_gained&splice_region_variant|KPNA3|p.Leu259fs	0	0	0	0	0	0	0
chr17	28166779	C	CCG	KPNA3	0.000564972	0	1	splice_acceptor_variant&intron_variant|KPNA3|	0	0	0	0	0	0	0
chr17	30548902	TC	T	NEK5	0.000564972	0	1	frameshift_variant|NEK5|p.Arg490fs	0	0	1	0	0	0	1
chr17	30564869	G	A	NEK5	0.000564972	0	1	stop_gained|NEK5|p.Arg290*	0	0	1	0	0	0	1
chr17	30923333	T	G	CKAP2	0.000564972	0	1	splice_donor_variant&intron_variant|CKAP2|	0	0	0	0	0	0	0
chr17	30927680	AG	A	CKAP2	0.000564972	0	1	splice_acceptor_variant&intron_variant|CKAP2|	0	0	0	0	0	0	0
chr17	57586200	C	T	LMO7	0.000564972	0	1	stop_gained|LMO7|p.Arg642*	0	0	0	1	0	0	1
chr17	59717948	A	T	EDNRB	0.000564972	0	1	splice_donor_variant&intron_variant|EDNRB|	0	1	1	1	0	1	4
chr17	76946731	G	C	ABCC4	0.000564972	0	1	stop_gained|ABCC4|p.Tyr596*	0	0	1	0	0	0	1
chr17	77671011	CTAGA	C	UGGT2	0.000564972	0	1	splice_acceptor_variant&splice_region_variant&intron_variant|UGGT2|	0	0	0	0	0	0	0
chr17	84327003	TAGTC	T	METTL21C	0.000564972	0	1	frameshift_variant|METTL21C|p.Asp250fs	0	0	0	0	0	0	0
chr17	91893517	G	GC	COL4A2	0.000564972	0	1	frameshift_variant|COL4A2|p.Gly465fs	0	0	0	1	0	0	1
chr18	5683130	G	T	C18H18orf63	0.000564972	0	1	stop_gained|C18H18orf63|p.Cys159*	0	0	0	0	0	0	0
chr18	11086925	TG	T	CCDC102B	0.000564972	0	1	frameshift_variant|CCDC102B|p.Ala148fs	0	0	0	0	0	0	0
chr18	16212515	C	CT	SERPINB10	0.000564972	0	1	frameshift_variant|SERPINB10|p.Leu285fs	0	0	0	0	0	0	0
chr18	16469591	G	T	ENSMMUG00000042415	0.000564972	0	1	splice_acceptor_variant&intron_variant|ENSMMUG00000042415|	0	0	0	0	0	0	0
chr18	23580672	G	GA	TXNL1	0.000564972	0	1	frameshift_variant|TXNL1|p.Ile103fs	0	0	0	0	0	0	0
chr18	31506647	A	ATTTT	ME2	0.000564972	0	1	frameshift_variant&splice_region_variant|ME2|p.Tyr82fs	0	0	1	0	0	0	1
chr18	35350058	A	ACC	HDHD2	0.000564972	0	1	frameshift_variant|HDHD2|p.Ser15fs	0	0	0	0	0	0	0
chr18	35918901	TC	T	LOXHD1	0.000564972	0	1	frameshift_variant|LOXHD1|p.Leu1450fs	0	1	0	0	0	0	1
chr18	36363309	A	AG	ATP5F1A	0.000564972	0	1	frameshift_variant|ATP5F1A|p.Ser156fs	0	0	1	0	1	0	2
chr18	46411753	G	T	SLC39A6	0.000564972	0	1	stop_gained|SLC39A6|p.Gly458*	0	0	0	0	0	0	0
chr18	49247003	A	ACTT	CCDC178	0.000564972	0	1	splice_acceptor_variant&intron_variant|CCDC178|	0	0	0	0	0	0	0
chr18	49247004	G	T	CCDC178	0.000564972	0	1	splice_acceptor_variant&intron_variant|CCDC178|	0	0	0	0	0	0	0
chr18	49247006	A	ACTTTT	CCDC178	0.000564972	0	1	frameshift_variant&splice_region_variant|CCDC178|p.Ile470fs	0	0	0	0	0	0	0
chr18	58460437	C	T	LAMA3	0.000564972	0	1	splice_donor_variant&intron_variant|LAMA3|	0	0	1	0	0	0	1
chr18	61977008	GA	G	ENOSF1	0.000564972	0	1	frameshift_variant&splice_region_variant|ENOSF1|p.Gly413fs	0	0	0	0	0	0	0
chr18	61995501	G	A	ENOSF1	0.000564972	0	1	stop_gained|ENOSF1|p.Gln129*	0	0	0	0	0	0	0
chr18	64194679	C	CT	LPIN2	0.000564972	0	1	frameshift_variant&splice_region_variant|LPIN2|p.Ile102fs	0	1	0	0	0	0	1
chr18	66551567	G	A	EPB41L3	0.000564972	0	1	stop_gained|EPB41L3|p.Arg301*	0	0	0	0	0	0	0
chr18	70479940	GAA	G	RALBP1	0.000564972	0	1	frameshift_variant|RALBP1|p.Glu512fs	0	0	0	0	0	0	0
chr18	71469665	CCA	C	NAPG	0.000564972	0	1	frameshift_variant|NAPG|p.Pro111fs	0	0	0	0	0	0	0
chr19	1907875	TTG	T	MOB3A	0.000564972	0	1	frameshift_variant|MOB3A|p.Asn73fs	0	0	0	0	0	0	0
chr19	2100143	C	T	JSRP1	0.000564972	0	1	splice_acceptor_variant&intron_variant|JSRP1|	0	0	0	0	0	0	0
chr19	2687932	A	T	ZNF554	0.000564972	0	1	stop_gained|ZNF554|p.Arg31*	0	0	0	0	0	0	0
chr19	3513176	C	CG	CACTIN	0.000564972	0	1	frameshift_variant|CACTIN|p.Arg130fs	0	0	0	0	0	0	0
chr19	3718042	CTG	C	ZFR2	0.000564972	0	1	frameshift_variant|ZFR2|p.Gln417fs	0	0	0	0	0	0	0
chr19	4432163	GC	G	PLIN4	0.000564972	0	1	frameshift_variant|PLIN4|p.Gly323fs	0	0	0	0	0	0	0
chr19	8414699	G	A	MYO1F	0.000564972	0	1	stop_gained|MYO1F|p.Arg999*	0	0	0	0	0	0	0
chr19	10130732	A	G	TYK2	0.000564972	0	1	splice_donor_variant&intron_variant|TYK2|	0	1	1	0	0	0	2
chr19	10394066	T	G	SLC44A2	0.000564972	0	1	splice_donor_variant&intron_variant|SLC44A2|	0	0	0	0	0	0	0
chr19	11676826	GGT	G	ZNF700	0.000564972	0	1	frameshift_variant|ZNF700|p.Tyr184fs	0	0	0	0	0	0	0
chr19	12254346	CT	C	DHPS	0.000564972	0	1	frameshift_variant|DHPS|p.Arg154fs	0	0	1	0	1	0	2
chr19	13676492	A	AG	ENSMMUG00000059667	0.000564972	0	1	frameshift_variant|ENSMMUG00000059667|p.Arg172fs	0	0	0	0	0	0	0
chr19	15059840	AC	A	RASAL3	0.000564972	0	1	frameshift_variant&splice_region_variant|RASAL3|p.Gly277fs	0	0	0	0	0	0	0
chr19	15346039	T	G	CYP4F11	0.000564972	0	1	splice_donor_variant&intron_variant|CYP4F11|	0	0	0	0	0	0	0
chr19	15397063	A	AC	ENSMMUG00000052449	0.000564972	0	1	frameshift_variant|ENSMMUG00000052449|p.Val196fs	0	0	0	0	0	0	0
chr19	16243325	G	A	NWD1	0.000564972	0	1	stop_gained|NWD1|p.Trp40*	0	0	0	0	0	0	0
chr19	18234558	G	A	KLHL26	0.000564972	0	1	splice_acceptor_variant&intron_variant|KLHL26|	0	0	0	0	0	0	0
chr19	19652426	GT	G	ZNF682	0.000564972	0	1	frameshift_variant|ZNF682|p.Lys255fs	0	0	0	0	0	0	0
chr19	20696163	ATG	A	ZNF429	0.000564972	0	1	frameshift_variant|ZNF429|p.Cys542fs	0	0	0	0	0	0	0
chr19	22564820	CCA	C	ZNF726	0.000564972	0	1	frameshift_variant|ZNF726|p.Cys361fs	0	0	0	0	0	0	0
chr19	29457896	A	ACT	URI1	0.000564972	0	1	frameshift_variant|URI1|p.Cys274fs	0	0	0	0	0	0	0
chr19	32178403	G	T	TDRD12	0.000564972	0	1	stop_gained|TDRD12|p.Glu263*	0	0	0	0	0	0	0
chr19	34786279	C	CT	FFAR1	0.000564972	0	1	frameshift_variant|FFAR1|p.Leu193fs	0	0	1	0	0	0	1
chr19	35194061	C	T	ARHGAP33	0.000564972	0	1	stop_gained|ARHGAP33|p.Arg309*	0	0	0	0	0	0	0
chr19	35425425	G	A	SYNE4	0.000564972	0	1	stop_gained|SYNE4|p.Gln297*	0	0	0	0	0	0	0
chr19	38875577	C	CA	LGALS13	0.000564972	0	1	frameshift_variant|LGALS13|p.Glu68fs	0	0	0	0	0	0	0
chr19	39259778	G	A	ZNF546	0.000564972	0	1	splice_donor_variant&intron_variant|ZNF546|	0	0	0	0	0	0	0
chr19	40517895	G	A	HNRNPUL1	0.000564972	0	1	splice_donor_variant&intron_variant|HNRNPUL1|	0	0	0	0	0	0	0
chr19	40538091	G	GTT	HNRNPUL1	0.000564972	0	1	splice_donor_variant&intron_variant|HNRNPUL1|	0	0	0	0	0	0	0
chr19	41746669	A	AT	CEACAM8	0.000564972	0	1	frameshift_variant|CEACAM8|p.His260fs	0	0	0	0	0	0	0
chr19	41751039	G	GA	CEACAM8	0.000564972	0	1	frameshift_variant|CEACAM8|p.Thr26fs	0	0	0	0	0	0	0
chr19	41832814	CA	C	ENSMMUG00000039210	0.000564972	0	1	frameshift_variant|ENSMMUG00000039210|p.Phe91fs	0	0	0	0	0	0	0
chr19	41961513	C	CT	ENSMMUG00000050799	0.000564972	0	1	frameshift_variant|ENSMMUG00000050799|p.Asp208fs	0	0	0	0	0	0	0
chr19	43439172	C	T	CD177	0.000564972	0	1	splice_acceptor_variant&intron_variant|CD177|	0	0	0	0	0	0	0
chr19	44743191	G	A	CEACAM16	0.000564972	0	1	splice_donor_variant&intron_variant|CEACAM16|	0	0	0	0	0	0	0
chr19	45744320	G	GCTGC	GIPR	0.000564972	0	1	frameshift_variant|GIPR|p.Arg217fs	0	0	0	0	0	0	0
chr19	46206811	A	AT	ENSMMUG00000044928	0.000564972	0	1	frameshift_variant|ENSMMUG00000044928|p.Val111fs	0	0	0	0	0	0	0
chr19	47764479	G	GA	EHD2	0.000564972	0	1	frameshift_variant|EHD2|p.Ile342fs	0	0	0	0	0	0	0
chr19	47903851	C	A	SULT2A1	0.000564972	0	1	splice_donor_variant&intron_variant|SULT2A1|	0	0	1	0	0	0	1
chr19	48057759	C	T	PLA2G4C	0.000564972	0	1	splice_donor_variant&intron_variant|PLA2G4C|	0	0	0	0	0	0	0
chr19	48926290	GC	G	DHDH	0.000564972	0	1	frameshift_variant|DHDH|p.Gly202fs	0	0	0	0	0	0	0
chr19	49416377	GCCCAC	G	ALDH16A1	0.000564972	0	1	frameshift_variant|ALDH16A1|p.Ala454fs	0	0	0	0	0	0	0
chr19	49676508	G	T	CPT1C	0.000564972	0	1	stop_gained|CPT1C|p.Glu197*	0	0	0	0	0	0	0
chr19	49679880	G	A	CPT1C	0.000564972	0	1	splice_donor_variant&intron_variant|CPT1C|	0	0	0	0	0	0	0
chr19	51208214	C	T	SIGLEC10	0.000564972	0	1	stop_gained|SIGLEC10|p.Trp303*	0	0	0	0	0	0	0
chr19	51228062	TC	T	SIGLEC6	0.000564972	0	1	frameshift_variant|SIGLEC6|p.Glu356fs	0	0	0	0	0	0	0
chr19	51228065	AGC	A	SIGLEC6	0.000564972	0	1	frameshift_variant|SIGLEC6|p.Met354fs	0	0	0	0	0	0	0
chr19	53822247	CAG	C	TARM1	0.000564972	0	1	frameshift_variant|TARM1|p.Ser200fs	0	0	0	0	0	0	0
chr19	54423339	C	T	ENSMMUG00000013289	0.000564972	0	1	stop_gained|ENSMMUG00000013289|p.Gln538*	0	0	0	0	0	0	0
chr19	54640112	G	A	NCR1	0.000564972	0	1	splice_donor_variant&intron_variant|NCR1|	0	0	0	0	0	0	0
chr19	54654348	C	CGTAGG	NLRP7	0.000564972	0	1	splice_acceptor_variant&intron_variant|NLRP7|	0	1	0	0	0	0	1
chr19	54867416	GC	G	TNNT1	0.000564972	0	1	frameshift_variant|TNNT1|p.Arg213fs	0	1	0	0	0	0	1
chr19	55488891	CA	C	ENSMMUG00000029506	0.000564972	0	1	frameshift_variant|ENSMMUG00000029506|p.Leu135fs	0	0	0	0	0	0	0
chr19	55771909	AAAGT	A	NLRP5	0.000564972	0	1	frameshift_variant&splice_donor_variant&splice_region_variant&intron_variant|NLRP5|p.Arg150fs	0	0	0	0	0	0	0
chr19	57078223	C	T	ZNF419	0.000564972	0	1	stop_gained&splice_region_variant|ZNF419|p.Gln25*	0	0	0	0	0	0	0
chr19	58134982	A	AGGTG	ENSMMUG00000017267	0.000564972	0	1	frameshift_variant|ENSMMUG00000017267|p.Leu253fs	0	0	0	0	0	0	0
chr20	97744	C	T	MPG	0.000564972	0	1	stop_gained|MPG|p.Arg104*	0	0	1	0	0	0	1
chr20	754616	CCACTT	C	CCDC78	0.000564972	0	1	frameshift_variant|CCDC78|p.Lys244fs	0	0	0	0	0	0	0
chr20	1096729	CT	C	C1QTNF8	0.000564972	0	1	frameshift_variant|C1QTNF8|p.Arg208fs	0	0	0	0	0	0	0
chr20	1097432	C	T	C1QTNF8	0.000564972	0	1	splice_donor_variant&intron_variant|C1QTNF8|	0	0	0	0	0	0	0
chr20	1509736	G	A	PTX4	0.000564972	0	1	stop_gained|PTX4|p.Gln207*	0	0	0	0	0	0	0
chr20	2180829	CG	C	RAB26	0.000564972	0	1	frameshift_variant|RAB26|p.Gly37fs	0	0	0	0	0	0	0
chr20	2243546	G	T	BRICD5	0.000564972	0	1	stop_gained|BRICD5|p.Tyr117*	0	0	0	0	0	0	0
chr20	3084451	TC	T	TNFRSF12A	0.000564972	0	1	frameshift_variant|TNFRSF12A|p.Ala14fs	0	0	0	0	0	0	0
chr20	3128332	C	CTA	MMP25	0.000564972	0	1	frameshift_variant|MMP25|p.Ser244fs	0	1	1	0	0	0	2
chr20	5141753	C	T	C20H16orf89	0.000564972	0	1	stop_gained|C20H16orf89|p.Trp269*	0	0	0	0	0	0	0
chr20	5173815	C	CA	ENSMMUG00000029240	0.000564972	0	1	frameshift_variant|ENSMMUG00000029240|p.Cys189fs	0	0	0	0	0	0	0
chr20	10720499	T	C	NUBP1	0.000564972	0	1	splice_donor_variant&intron_variant|NUBP1|	0	0	0	0	0	0	0
chr20	11394502	G	GCC	ENSMMUG00000000566	0.000564972	0	1	frameshift_variant|ENSMMUG00000000566|p.Ile1672fs	0	0	0	0	0	0	0
chr20	11794216	TTC	T	RSL1D1	0.000564972	0	1	frameshift_variant|RSL1D1|p.Arg294fs	0	0	0	0	0	0	0
chr20	18328818	CCT	C	GDE1	0.000564972	0	1	splice_acceptor_variant&intron_variant|GDE1|	0	0	0	0	0	0	0
chr20	18454529	CAAGT	C	VPS35L	0.000564972	0	1	frameshift_variant&splice_donor_variant&splice_region_variant&intron_variant|VPS35L|p.Asn550fs	0	0	0	0	0	0	0
chr20	18511111	A	AT	VPS35L	0.000564972	0	1	frameshift_variant|VPS35L|p.Thr948fs	0	0	0	0	0	0	0
chr20	19326003	C	T	ENSMMUG00000009003	0.000564972	0	1	stop_gained|ENSMMUG00000009003|p.Arg358*	0	0	0	0	0	0	0
chr20	19526812	A	AT	ERI2	0.000564972	0	1	frameshift_variant|ERI2|p.His54fs	0	0	0	0	0	0	0
chr20	19527017	T	A	ERI2	0.000564972	0	1	stop_gained|ERI2|p.Arg15*	0	0	0	0	0	0	0
chr20	20766442	CAG	C	IGSF6	0.000564972	0	1	frameshift_variant|IGSF6|p.Ser31fs	0	0	0	0	0	0	0
chr20	22023741	G	GGGATTT	PLK1	0.000564972	0	1	splice_donor_variant&intron_variant|PLK1|	0	0	1	1	1	0	3
chr20	27260586	G	GCTCC	YPEL3	0.000564972	0	1	frameshift_variant|YPEL3|p.Arg66fs	0	0	0	0	0	0	0
chr20	28781486	T	A	ITGAM	0.000564972	0	1	splice_donor_variant&intron_variant|ITGAM|	0	0	0	0	0	0	0
chr20	28872605	G	A	ITGAX	0.000564972	0	1	splice_donor_variant&intron_variant|ITGAX|	0	0	1	0	0	0	1
chr20	28940965	G	A	SLC5A2	0.000564972	0	1	splice_acceptor_variant&intron_variant|SLC5A2|	0	1	1	0	0	0	2
chr20	34758953	A	G	PHKB	0.000564972	0	1	splice_acceptor_variant&intron_variant|PHKB|	0	1	0	0	0	0	1
chr20	42705084	C	T	LPCAT2	0.000564972	0	1	stop_gained|LPCAT2|p.Arg414*	0	0	0	0	0	0	0
chr20	42902065	AG	A	CES1	0.000564972	0	1	frameshift_variant|CES1|p.Leu381fs	1	0	1	0	0	0	2
chr20	43661355	AT	A	OGFOD1	0.000564972	0	1	frameshift_variant|OGFOD1|p.Phe148fs	0	0	1	0	0	0	1
chr20	45010384	T	C	KIFC3	0.000564972	0	1	splice_acceptor_variant&intron_variant|KIFC3|	0	0	0	0	0	0	0
chr20	55579648	T	C	PRMT7	0.000564972	0	1	splice_donor_variant&intron_variant|PRMT7|	0	0	0	0	0	0	0
chr20	59522325	C	CA	PKD1L3	0.000564972	0	1	frameshift_variant|PKD1L3|p.Asn425fs	0	0	0	0	0	0	0
chr20	59523788	A	AG	PKD1L3	0.000564972	0	1	splice_acceptor_variant&intron_variant|PKD1L3|	0	0	0	0	0	0	0
chr20	61679813	C	CTA	FA2H	0.000564972	0	1	frameshift_variant|FA2H|p.Gly267fs	0	1	0	0	0	0	1
chr20	68381435	G	GCAAGACA	GAN	0.000564972	0	1	splice_donor_variant&intron_variant|GAN|	0	1	0	0	0	0	1
chr20	71194317	G	A	TAF1C	0.000564972	0	1	stop_gained|TAF1C|p.Arg466*	0	0	0	0	0	0	0
chr20	74306271	C	T	C16orf95	0.000564972	0	1	stop_gained|C16orf95|p.Trp100*	0	0	0	0	0	0	0
chr20	75696756	A	ACTGT	SNAI3	0.000564972	0	1	frameshift_variant|SNAI3|p.Leu128fs	0	0	0	0	0	0	0
chrX	1253851	C	CAT	P2RY8	0.000564972	0	1	frameshift_variant|P2RY8|p.Met114fs	0	0	0	0	0	0	0
chrX	16544165	A	AGTATG	RBBP7	0.000564972	0	1	frameshift_variant&splice_region_variant|RBBP7|p.Val245fs	0	0	0	0	0	0	0
chrX	24363565	G	A	PDK3	0.000564972	0	1	stop_gained|PDK3|p.Trp389*	0	0	1	0	0	0	1
chrX	40479106	G	A	CXHXorf38	0.000564972	0	1	stop_gained|CXHXorf38|p.Arg128*	0	0	0	0	0	0	0
chrX	41209830	G	GTGGC	DDX3X	0.000564972	0	1	splice_donor_variant&intron_variant|DDX3X|	0	0	0	0	0	1	1
chrX	49865554	T	C	CLCN5	0.000564972	0	1	splice_donor_variant&intron_variant|CLCN5|	0	0	0	0	0	1	1
chrX	50142586	T	TG	DGKK	0.000564972	0	1	frameshift_variant|DGKK|p.Asp477fs	0	0	0	0	0	0	0
chrX	62353470	G	GCCC	MSN	0.000564972	0	1	splice_donor_variant&intron_variant|MSN|	0	0	0	0	0	0	0
chrX	68285465	C	T	NONO	0.000564972	0	1	stop_gained|NONO|p.Gln138*	0	0	0	0	0	0	0
chrX	68541661	G	A	OGT	0.000564972	0	1	splice_donor_variant&intron_variant|OGT|	0	0	0	0	1	0	1
chrX	68562224	G	GAATCA	OGT	0.000564972	0	1	splice_donor_variant&intron_variant|OGT|	0	0	0	0	1	0	1
chrX	68565105	G	A	OGT	0.000564972	0	1	splice_donor_variant&intron_variant|OGT|	0	0	0	0	1	0	1
chrX	114864316	CACAAAGG	C	DOCK11	0.000564972	0	1	frameshift_variant|DOCK11|p.Thr741fs	0	0	0	0	0	0	0
chrX	114864323	G	GTTTTT	DOCK11	0.000564972	0	1	frameshift_variant|DOCK11|p.Gly743fs	0	0	0	0	0	0	0
chrX	114864329	A	ATT	DOCK11	0.000564972	0	1	frameshift_variant|DOCK11|p.Thr745fs	0	0	0	0	0	0	0
chrX	115427031	G	GA	KIAA1210	0.000564972	0	1	frameshift_variant|KIAA1210|p.Pro119fs	0	0	0	0	0	0	0
chrX	115427032	G	GTAGGAGAA	KIAA1210	0.000564972	0	1	frameshift_variant|KIAA1210|p.Pro119fs	0	0	0	0	0	0	0
chrX	132441581	CAT	C	ADGRG4	0.000564972	0	1	frameshift_variant|ADGRG4|p.Phe962fs	0	0	0	0	0	0	0
chrX	149770581	C	CTCA	IDH3G	0.000564972	0	1	splice_acceptor_variant&intron_variant|IDH3G|	0	0	1	0	0	0	1
chrX	149971200	TG	T	TMEM187	0.000564972	0	1	frameshift_variant|TMEM187|p.Trp129fs	0	0	0	0	0	0	0
chrX	150296612	T	G	FLNA	0.000564972	0	1	splice_donor_variant&intron_variant|FLNA|	0	0	1	1	0	1	3
chrX	150631226	CT	C	ENSMMUG00000017405	0.000564972	0	1	frameshift_variant|ENSMMUG00000017405|p.Gly29fs	0	0	0	0	0	0	0
QNVO02000255.1	76880	T	C	ENSMMUG00000061631	0.000564972	0	1	splice_donor_variant&intron_variant|ENSMMUG00000061631|	0	0	0	0	0	0	0
QNVO02002411.1	25395	GT	G	ENSMMUG00000049155	0.000564972	0	1	frameshift_variant|ENSMMUG00000049155|p.Asn112fs	0	0	0	0	0	0	0
chr1	769681	C	CATGGGGA	OR2M4	0.00112994	0	2	frameshift_variant|OR2M4|p.Gln54fs	0	0	0	0	0	0	0
chr1	769683	GC	G	OR2M4	0.00112994	0	2	frameshift_variant|OR2M4|p.Leu55fs	0	0	0	0	0	0	0
chr1	769685	TCCAC	T	OR2M4	0.00112994	0	2	frameshift_variant|OR2M4|p.His56fs	0	0	0	0	0	0	0
chr1	770107	G	GA	OR2M4	0.00112994	0	2	frameshift_variant|OR2M4|p.Arg197fs	0	0	0	0	0	0	0
chr1	5832479	C	T	SDCCAG8	0.00112994	0	2	splice_donor_variant&intron_variant|SDCCAG8|	0	0	0	0	0	0	0
chr1	5862418	TG	T	SDCCAG8	0.00112994	0	2	frameshift_variant|SDCCAG8|p.His106fs	0	0	0	0	0	0	0
chr1	18219929	C	CCAAA	CAPN9	0.00112994	0	2	frameshift_variant|CAPN9|p.Gly249fs	0	0	0	0	0	0	0
chr1	36579534	C	T	AXDND1	0.00112994	0	2	stop_gained|AXDND1|p.Gln154*	0	0	0	0	0	0	0
chr1	38254926	A	G	MR1	0.00112994	0	2	splice_acceptor_variant&intron_variant|MR1|	0	0	1	0	0	0	1
chr1	39828628	G	A	RNASEL	0.00112994	0	2	stop_gained|RNASEL|p.Gln656*	1	0	0	0	0	0	1
chr1	41979822	TCTTTATAC	T	EDEM3	0.00112994	0	2	splice_donor_variant&splice_region_variant&intron_variant|EDEM3|	0	0	0	0	0	0	0
chr1	55014165	TGGCATTGG	T	DENND1B	0.00112994	0	2	frameshift_variant|DENND1B|p.Pro260fs	0	0	0	0	0	0	0
chr1	60681545	G	A	CHI3L1	0.00112994	0	2	stop_gained|CHI3L1|p.Arg224*	0	0	0	0	0	0	0
chr1	62585975	C	T	CNTN2	0.00112994	0	2	stop_gained|CNTN2|p.Gln529*	0	0	0	0	0	0	0
chr1	67513687	GA	G	SYT14	0.00112994	0	2	frameshift_variant|SYT14|p.Asn277fs	0	0	0	0	0	0	0
chr1	77613364	G	A	BPNT1	0.00112994	0	2	stop_gained|BPNT1|p.Arg217*	0	0	0	0	0	0	0
chr1	83926094	C	CTT	PARP1	0.00112994	0	2	splice_acceptor_variant&intron_variant|PARP1|	0	0	1	1	0	0	2
chr1	91134720	AAC	A	FCRL6	0.00112994	0	2	frameshift_variant|FCRL6|p.Phe30fs	0	0	0	0	0	0	0
chr1	91225164	CAA	C	CRP	0.00112994	0	2	frameshift_variant|CRP|p.Lys31fs	0	0	1	0	0	0	1
chr1	92652091	C	T	CD1E	0.00112994	0	2	stop_gained|CD1E|p.Trp130*	0	0	0	0	0	0	0
chr1	92665603	GT	G	CD1B	0.00112994	0	2	frameshift_variant|CD1B|p.Leu50fs	0	0	0	0	0	0	0
chr1	94645558	T	G	CCT3	0.00112994	0	2	splice_donor_variant&intron_variant|CCT3|	0	0	1	1	1	0	3
chr1	97521596	AGT	A	S100A3	0.00112994	0	2	frameshift_variant|S100A3|p.Val61fs	0	0	0	0	0	0	0
chr1	98644338	G	GA	CRNN	0.00112994	0	2	frameshift_variant|CRNN|p.Gly259fs	0	0	0	0	0	0	0
chr1	100892626	A	C	CA14	0.00112994	0	2	stop_gained|CA14|p.Tyr141*	0	0	1	0	0	0	1
chr1	113749124	TGA	T	SLC16A4	0.00112994	0	2	frameshift_variant|SLC16A4|p.Asn204fs	0	0	1	0	0	0	1
chr1	115101417	G	GCTAC	ENSMMUG00000049510	0.00112994	0	2	frameshift_variant|ENSMMUG00000049510|p.Leu600fs	0	0	0	0	0	0	0
chr1	115536709	GC	G	FNDC7	0.00112994	0	2	frameshift_variant|FNDC7|p.Gly78fs	0	0	0	0	0	0	0
chr1	145485599	T	A	ADGRL4	0.00112994	0	2	stop_gained|ADGRL4|p.Tyr424*	0	0	0	0	0	0	0
chr1	149927230	TG	T	LRRC53	0.00112994	0	2	frameshift_variant|LRRC53|p.Ser265fs	0	0	0	0	0	0	0
chr1	154303778	T	C	LRRC40	0.00112994	0	2	splice_donor_variant&intron_variant|LRRC40|	0	0	0	0	0	0	0
chr1	155681479	G	GC	ENSMMUG00000007527	0.00112994	0	2	frameshift_variant|ENSMMUG00000007527|p.Lys665fs	0	0	0	0	0	0	0
chr1	157011731	G	GTCAA	SERBP1	0.00112994	0	2	splice_donor_variant&intron_variant|SERBP1|	0	0	0	0	0	0	0
chr1	158798697	A	ACT	LEPR	0.00112994	0	2	frameshift_variant|LEPR|p.Ser1088fs	0	1	1	0	0	0	2
chr1	162318289	G	GAGACA	PATJ	0.00112994	0	2	frameshift_variant|PATJ|p.His1740fs	0	0	0	0	0	0	0
chr1	170372585	A	ACTTAT	TMEM59	0.00112994	0	2	splice_donor_variant&intron_variant|TMEM59|	0	0	0	0	0	0	0
chr1	177611640	C	A	CYP4B1	0.00112994	0	2	stop_gained|CYP4B1|p.Glu96*	0	0	0	0	0	0	0
chr1	179093259	CA	C	MUTYH	0.00112994	0	2	frameshift_variant|MUTYH|p.Ile209fs	0	1	0	0	0	0	1
chr1	182058483	T	G	CCDC30	0.00112994	0	2	splice_acceptor_variant&intron_variant|CCDC30|	0	0	0	0	0	0	0
chr1	189011380	G	C	PSMB2	0.00112994	0	2	splice_donor_variant&intron_variant|PSMB2|	0	0	1	0	1	0	2
chr1	189451825	C	CA	SFPQ	0.00112994	0	2	frameshift_variant&stop_gained|SFPQ|p.Tyr602fs	0	0	1	0	0	0	1
chr1	189520093	T	A	ZMYM1	0.00112994	0	2	stop_gained|ZMYM1|p.Lys174*	0	0	0	0	0	0	0
chr1	191971777	G	A	SYNC	0.00112994	0	2	splice_donor_variant&intron_variant|SYNC|	0	0	0	0	0	0	0
chr1	196111133	C	G	TRNAU1AP	0.00112994	0	2	splice_donor_variant&intron_variant|TRNAU1AP|	0	0	0	0	1	0	1
chr1	196451244	TC	T	SESN2	0.00112994	0	2	frameshift_variant|SESN2|p.Glu34fs	0	0	0	0	0	0	0
chr1	197371088	CG	C	MAP3K6	0.00112994	0	2	frameshift_variant|MAP3K6|p.Ala221fs	0	0	1	0	0	0	1
chr1	208166542	TCA	T	ENSMMUG00000052555	0.00112994	0	2	frameshift_variant|ENSMMUG00000052555|p.Ser110fs	0	0	0	0	0	0	0
chr1	209060243	G	A	PLEKHM2	0.00112994	0	2	stop_gained|PLEKHM2|p.Gln870*	0	0	0	0	0	0	0
chr1	211634938	G	GC	ENSMMUG00000054309	0.00112994	0	2	frameshift_variant|ENSMMUG00000054309|p.Val94fs	0	0	0	0	0	0	0
chr1	212689908	G	A	C1H1orf167	0.00112994	0	2	stop_gained|C1H1orf167|p.Gln651*	0	0	0	0	0	0	0
chr1	213502916	A	G	C1H1orf127	0.00112994	0	2	splice_acceptor_variant&intron_variant|C1H1orf127|	0	0	0	0	0	0	0
chr1	214538256	C	T	LZIC	0.00112994	0	2	stop_gained|LZIC|p.Gln105*	0	0	0	0	0	0	0
chr1	215471751	CG	C	SLC2A7	0.00112994	0	2	frameshift_variant|SLC2A7|p.Val92fs	0	0	0	0	0	0	0
chr1	215529737	C	T	CA6	0.00112994	0	2	stop_gained|CA6|p.Trp234*	0	0	1	0	0	0	1
chr1	216180123	T	TCA	SLC45A1	0.00112994	0	2	frameshift_variant|SLC45A1|p.Lys491fs	0	0	0	0	0	0	0
chr1	222907559	GA	G	ENSMMUG00000064596	0.00112994	1	0	frameshift_variant|ENSMMUG00000064596|p.Phe238fs	0	0	0	0	0	0	0
chr1	223457864	CGT	C	PLEKHN1	0.00112994	0	2	frameshift_variant|PLEKHN1|p.Asp48fs	0	0	0	0	0	0	0
chr2	305605	C	CT	LRCH3	0.00112994	0	2	frameshift_variant|LRCH3|p.Arg605fs	0	0	0	0	0	0	0
chr2	558966	CCA	C	MUC20	0.00112994	0	2	frameshift_variant|MUC20|p.Thr266fs	0	0	0	0	0	0	0
chr2	598681	C	T	ENSMMUG00000047184	0.00112994	0	2	stop_gained|ENSMMUG00000047184|p.Trp386*	0	0	0	0	0	0	0
chr2	3286908	C	CA	LSG1	0.00112994	0	2	frameshift_variant|LSG1|p.Gln109fs	0	0	0	0	1	0	1
chr2	4594648	G	GT	ATP13A5	0.00112994	0	2	frameshift_variant|ATP13A5|p.Leu75fs	0	0	0	0	0	0	0
chr2	14524232	C	A	SUSD5	0.00112994	0	2	stop_gained|SUSD5|p.Tyr165*	0	0	0	0	0	0	0
chr2	19424800	C	A	ENSMMUG00000000055	0.00112994	0	2	splice_acceptor_variant&intron_variant|ENSMMUG00000000055|	0	0	0	0	0	0	0
chr2	32735226	G	A	COL6A5	0.00112994	0	2	splice_acceptor_variant&intron_variant|COL6A5|	0	0	0	0	0	0	0
chr2	33322421	CCAGT	C	ASTE1	0.00112994	0	2	frameshift_variant|ASTE1|p.Tyr471fs	0	0	0	0	0	0	0
chr2	34911451	CT	C	ACAD11	0.00112994	0	2	frameshift_variant|ACAD11|p.Ala118fs	0	0	0	0	0	0	0
chr2	41111259	G	A	FOXL2NB	0.00112994	0	2	splice_acceptor_variant&intron_variant|FOXL2NB|	0	0	0	0	0	0	0
chr2	48652786	G	A	PLSCR2	0.00112994	0	2	stop_gained|PLSCR2|p.Gln71*	0	0	0	0	0	0	0
chr2	53365524	TA	T	GPR171	0.00112994	0	2	frameshift_variant|GPR171|p.Tyr22fs	0	0	0	0	0	0	0
chr2	53603771	G	GTACT	IGSF10	0.00112994	0	2	frameshift_variant&stop_gained|IGSF10|p.Tyr1717fs	0	0	1	0	0	0	1
chr2	56713607	AG	A	GPR149	0.00112994	0	2	frameshift_variant|GPR149|p.Tyr132fs	0	0	0	0	0	0	0
chr2	61071046	TG	T	MFSD1	0.00112994	0	2	frameshift_variant|MFSD1|p.Gly387fs	0	0	0	0	0	0	0
chr2	70433588	TG	T	BCHE	0.00112994	0	2	frameshift_variant|BCHE|p.Pro102fs	0	1	1	0	0	0	2
chr2	72089896	TC	T	ZBBX	0.00112994	0	2	frameshift_variant|ZBBX|p.Asp633fs	0	0	0	0	0	0	0
chr2	72418298	A	ACC	WDR49	0.00112994	0	2	frameshift_variant|WDR49|p.Leu161fs	0	0	0	0	0	0	0
chr2	76555647	CTA	C	PLD1	0.00112994	0	2	splice_acceptor_variant&splice_region_variant&intron_variant|PLD1|	0	0	1	0	0	0	1
chr2	89396991	G	A	HTR3E	0.00112994	0	2	stop_gained|HTR3E|p.Trp194*	0	0	1	0	0	0	1
chr2	91633815	G	GTC	DGKG	0.00112994	0	2	frameshift_variant|DGKG|p.Pro176fs	0	0	1	0	0	0	1
chr2	93951418	T	TA	EXOG	0.00112994	0	2	frameshift_variant&stop_gained|EXOG|p.Tyr77fs	0	0	0	0	0	0	0
chr2	96499666	CT	C	ZNF621	0.00112994	0	2	frameshift_variant|ZNF621|p.Leu71fs	0	0	0	0	0	0	0
chr2	98855906	G	GA	ZNF662	0.00112994	0	2	frameshift_variant&splice_region_variant|ZNF662|p.Gly112fs	0	0	0	0	0	0	0
chr2	101972709	C	A	FYCO1	0.00112994	0	2	stop_gained|FYCO1|p.Glu574*	0	0	0	0	0	0	0
chr2	104421652	CCAAA	C	FBXW12	0.00112994	0	2	frameshift_variant|FBXW12|p.Thr289fs	0	0	0	0	0	0	0
chr2	105093025	C	CT	DALRD3	0.00112994	0	2	frameshift_variant|DALRD3|p.Arg308fs	0	0	0	0	0	0	0
chr2	108129354	CCTGA	C	ACY1	0.00112994	1	0	frameshift_variant|ACY1|p.Thr355fs	0	1	1	0	0	0	2
chr2	108291442	C	G	POC1A	0.00112994	0	2	splice_acceptor_variant&intron_variant|POC1A|	0	0	0	0	0	0	0
chr2	108977857	C	T	ITIH3	0.00112994	0	2	stop_gained|ITIH3|p.Gln174*	0	0	1	0	0	0	1
chr2	112781421	AG	A	CCDC66	0.00112994	0	2	frameshift_variant|CCDC66|p.Val738fs	0	0	0	0	0	0	0
chr2	141189264	C	T	RPUSD3	0.00112994	0	2	splice_acceptor_variant&intron_variant|RPUSD3|	0	0	0	0	0	0	0
chr2	141648783	C	CTCCTCCCT	TATDN2	0.00112994	0	2	frameshift_variant|TATDN2|p.His85fs	0	0	0	0	0	0	0
chr2	144206569	A	T	CAND2	0.00112994	0	2	splice_acceptor_variant&intron_variant|CAND2|	0	0	0	0	0	0	0
chr2	147074858	T	TAGAG	EFCAB12	0.00112994	0	2	frameshift_variant&stop_gained|EFCAB12|p.Cys19fs	0	0	0	0	0	0	0
chr2	150019263	A	G	UROC1	0.00112994	0	2	splice_acceptor_variant&intron_variant|UROC1|	0	1	0	0	0	0	1
chr2	151311778	C	CTT	HEG1	0.00112994	0	2	frameshift_variant|HEG1|p.Ser772fs	0	0	0	1	0	0	1
chr2	151406336	TCACAG	T	MUC13	0.00112994	0	2	frameshift_variant&splice_region_variant|MUC13|p.Thr427fs	0	0	0	0	0	0	0
chr2	156093443	CTTTG	C	GPR156	0.00112994	0	2	frameshift_variant|GPR156|p.Cys299fs	0	0	0	0	0	0	0
chr2	163641075	T	C	ATG3	0.00112994	0	2	splice_donor_variant&intron_variant|ATG3|	0	0	0	0	0	0	0
chr2	167735309	GA	G	MYH15	0.00112994	0	2	frameshift_variant|MYH15|p.Glu339fs	0	0	0	0	0	0	0
chr2	177641292	CTT	C	OR5K1	0.00112994	0	2	frameshift_variant|OR5K1|p.Lys231fs	0	0	0	0	0	0	0
chr2	177641552	G	GTCATC	OR5K1	0.00112994	0	2	frameshift_variant&stop_gained|OR5K1|p.Thr145fs	0	0	0	0	0	0	0
chr3	480437	CG	C	C3H21orf58	0.00112994	0	2	frameshift_variant|C3H21orf58|p.Val277fs	0	0	0	0	0	0	0
chr3	2405863	AT	A	PFKL	0.00112994	0	2	frameshift_variant|PFKL|p.Asp673fs	0	0	0	0	0	0	0
chr3	42020957	ACT	A	CYP3A43	0.00112994	0	2	frameshift_variant|CYP3A43|p.Ser100fs	0	0	0	0	0	0	0
chr3	42271722	G	A	COPS6	0.00112994	0	2	splice_acceptor_variant&intron_variant|COPS6|	0	0	0	1	1	0	2
chr3	43041464	TC	T	MUC3A	0.00112994	0	2	frameshift_variant|MUC3A|p.Ser2629fs	0	0	0	0	0	0	0
chr3	45777778	CG	C	FZD9	0.00112994	0	2	frameshift_variant|FZD9|p.Ala550fs	0	0	0	1	0	0	1
chr3	59098049	T	TAA	SUMF2	0.00112994	1	0	frameshift_variant|SUMF2|p.Ser357fs	0	0	0	0	0	0	0
chr3	70260594	CGGACACT	C	MYO1G	0.00112994	0	2	frameshift_variant|MYO1G|p.Thr698fs	0	0	0	0	0	0	0
chr3	110256078	G	C	DYNC1I1	0.00112994	0	2	stop_gained|DYNC1I1|p.Ser167*	0	0	0	0	0	0	0
chr3	112797556	CTCTTT	C	VPS50	0.00112994	0	2	frameshift_variant|VPS50|p.Lys551fs	0	0	0	0	0	0	0
chr3	132309541	G	T	CDHR3	0.00112994	0	2	stop_gained|CDHR3|p.Glu148*	0	0	0	0	0	0	0
chr3	132312684	C	T	CDHR3	0.00112994	0	2	stop_gained|CDHR3|p.Gln191*	0	0	0	0	0	0	0
chr3	134361297	TCTTCA	T	LAMB4	0.00112994	0	2	frameshift_variant|LAMB4|p.Ser1544fs	0	0	0	0	0	0	0
chr3	160564064	GT	G	LRGUK	0.00112994	0	2	frameshift_variant|LRGUK|p.Ser702fs	0	0	0	0	0	0	0
chr3	167105057	A	C	ADCK2	0.00112994	0	2	splice_acceptor_variant&intron_variant|ADCK2|	0	0	0	0	0	0	0
chr3	169632589	T	TC	OR6V1	0.00112994	0	2	frameshift_variant|OR6V1|p.Leu323fs	0	0	0	0	0	0	0
chr3	176214085	GA	G	ZNF862	0.00112994	0	2	frameshift_variant|ZNF862|p.Asp299fs	0	0	0	0	0	0	0
chr4	11331531	T	G	FNDC1	0.00112994	0	2	splice_acceptor_variant&intron_variant|FNDC1|	0	0	0	0	0	0	0
chr4	20376473	TC	T	GPRC6A	0.00112994	0	2	frameshift_variant|GPRC6A|p.Gly92fs	0	0	0	0	0	0	0
chr4	20391450	G	A	GPRC6A	0.00112994	0	2	stop_gained|GPRC6A|p.Arg57*	0	0	0	0	0	0	0
chr4	24896537	T	TC	ENSMMUG00000006198	0.00112994	0	2	frameshift_variant|ENSMMUG00000006198|p.Tyr103fs	0	0	0	0	0	0	0
chr4	33167883	C	CT	ARHGAP18	0.00112994	0	2	splice_acceptor_variant&intron_variant|ARHGAP18|	0	0	0	0	0	0	0
chr4	40780209	G	A	IL22RA2	0.00112994	0	2	stop_gained|IL22RA2|p.Gln48*	0	0	0	0	0	0	0
chr4	57626152	CAG	C	ENSMMUG00000060940	0.00112994	0	2	frameshift_variant|ENSMMUG00000060940|p.Arg24fs	0	0	0	0	0	0	0
chr4	58543610	GC	G	SYNE1	0.00112994	0	2	frameshift_variant|SYNE1|p.Ala3208fs	0	0	0	1	0	0	1
chr4	66568473	A	AAT	QRSL1	0.00112994	0	2	splice_donor_variant&intron_variant|QRSL1|	0	0	0	0	0	0	0
chr4	68094685	G	A	BVES	0.00112994	0	2	splice_donor_variant&intron_variant|BVES|	0	0	0	0	0	0	0
chr4	95571539	CTG	C	HTR1B	0.00112994	0	2	frameshift_variant|HTR1B|p.Val111fs	0	0	1	0	0	0	1
chr4	99335024	AT	A	SLC17A5	0.00112994	0	2	frameshift_variant|SLC17A5|p.Phe432fs	0	1	0	1	0	0	2
chr4	115283904	C	T	MLIP	0.00112994	0	2	splice_acceptor_variant&intron_variant|MLIP|	0	0	0	0	0	0	0
chr4	117485233	C	T	PKHD1	0.00112994	0	2	stop_gained|PKHD1|p.Gln984*	0	1	0	1	0	0	2
chr4	122388865	C	T	ADGRF1	0.00112994	0	2	stop_gained&splice_region_variant|ADGRF1|p.Arg203*	0	0	1	0	0	0	1
chr4	125896532	GGT	G	ABCC10	0.00112994	0	2	frameshift_variant|ABCC10|p.Thr561fs	0	0	0	0	0	0	0
chr4	126377997	ACTCT	A	PEX6	0.00112994	0	2	frameshift_variant|PEX6|p.Leu880fs	0	1	0	0	0	0	1
chr4	127605177	CCT	C	PRICKLE4	0.00112994	0	2	frameshift_variant|PRICKLE4|p.Gln174fs	0	0	0	0	0	0	0
chr4	128256048	T	TC	TREML1	0.00112994	0	2	frameshift_variant|TREML1|p.Leu170fs	0	0	0	0	0	0	0
chr4	130057229	C	T	KCNK16	0.00112994	0	2	stop_gained|KCNK16|p.Gln68*	0	0	0	0	0	0	0
chr4	137450227	T	TTG	TNXB	0.00112994	0	2	frameshift_variant|TNXB|p.Arg3177fs	0	1	0	0	0	0	1
chr4	137478913	G	A	ENSMMUG00000049499	0.00112994	1	0	stop_gained|ENSMMUG00000049499|p.Arg328*	0	0	0	0	0	0	0
chr4	137842327	AG	A	GPANK1	0.00112994	0	2	frameshift_variant|GPANK1|p.Gly267fs	0	0	0	0	0	0	0
chr4	139751726	C	CTT	TRIM40	0.00112994	0	2	frameshift_variant|TRIM40|p.Gly140fs	0	0	0	0	0	0	0
chr4	140412743	A	AG	ENSMMUG00000043529	0.00112994	0	2	frameshift_variant|ENSMMUG00000043529|p.Ser28fs	0	0	0	0	0	0	0
chr4	141660087	C	T	ZBED9	0.00112994	0	2	stop_gained|ZBED9|p.Gln187*	0	0	0	0	0	0	0
chr4	141857623	CAG	C	ZSCAN12	0.00112994	0	2	frameshift_variant|ZSCAN12|p.Arg350fs	0	0	0	0	0	0	0
chr4	141918556	G	T	ZSCAN31	0.00112994	0	2	stop_gained|ZSCAN31|p.Glu108*	0	0	0	0	0	0	0
chr4	141991423	TTTGTG	T	NKAPL	0.00112994	0	2	frameshift_variant|NKAPL|p.His235fs	0	0	0	0	0	0	0
chr4	142041730	GC	G	ZSCAN9	0.00112994	0	2	frameshift_variant|ZSCAN9|p.Arg35fs	0	0	0	0	0	0	0
chr4	142379186	A	AG	ENSMMUG00000055773	0.00112994	0	2	frameshift_variant|ENSMMUG00000055773|p.Tyr99fs	0	0	0	0	0	0	0
chr4	143786091	T	TA	ENSMMUG00000060950	0.00112994	0	2	frameshift_variant|ENSMMUG00000060950|p.Lys9fs	0	0	0	0	0	0	0
chr4	143886531	T	TAC	ENSMMUG00000065238	0.00112994	0	2	frameshift_variant|ENSMMUG00000065238|p.Val88fs	0	0	0	0	0	0	0
chr4	145293506	GAT	G	ACOT13	0.00112994	0	2	frameshift_variant|ACOT13|p.Ser241fs	0	0	1	0	0	0	1
chr4	145687513	G	T	DCDC2	0.00112994	0	2	splice_acceptor_variant&intron_variant|DCDC2|	0	0	0	0	0	0	0
chr4	154519461	C	CCG	JARID2	0.00112994	0	2	frameshift_variant|JARID2|p.Ser260fs	0	0	0	1	0	0	1
chr4	156398742	C	CT	SIRT5	0.00112994	0	2	frameshift_variant|SIRT5|p.Glu276fs	0	0	1	0	0	0	1
chr4	159099884	G	A	SYCP2L	0.00112994	0	2	stop_gained|SYCP2L|p.Arg269*	0	0	0	0	0	0	0
chr4	167277771	G	T	SERPINB1	0.00112994	0	2	stop_gained|SERPINB1|p.Gly150*	0	0	0	0	0	0	0
chr5	6350117	TG	T	MAN2B2	0.00112994	0	2	frameshift_variant|MAN2B2|p.His919fs	0	0	0	0	0	0	0
chr5	8923090	TC	T	SLC2A9	0.00112994	0	2	frameshift_variant&splice_region_variant|SLC2A9|p.Asp370fs	0	0	0	1	0	0	1
chr5	47550707	G	A	TEC	0.00112994	0	2	stop_gained|TEC|p.Arg509*	1	0	1	0	0	0	2
chr5	49021521	A	T	CDS1	0.00112994	0	2	splice_donor_variant&intron_variant|CDS1|	0	0	0	0	0	0	0
chr5	50772105	TA	T	THAP9	0.00112994	0	2	frameshift_variant|THAP9|p.Leu511fs	0	0	0	0	0	0	0
chr5	51223884	T	C	TMEM150C	0.00112994	0	2	splice_donor_variant&intron_variant|TMEM150C|	0	0	0	0	0	0	0
chr5	63623380	A	C	ODAM	0.00112994	0	2	stop_gained|ODAM|p.Tyr224*	0	0	0	0	0	0	0
chr5	63847652	C	T	CSN1S1	0.00112994	0	2	splice_donor_variant&intron_variant|CSN1S1|	0	0	0	0	0	0	0
chr5	64033168	T	G	SULT1B1	0.00112994	0	2	stop_gained|SULT1B1|p.Leu145*	0	0	1	0	0	0	1
chr5	64033912	G	GA	SULT1B1	0.00112994	0	2	frameshift_variant|SULT1B1|p.Glu185fs	0	0	1	0	0	0	1
chr5	65951692	TG	T	STAP1	0.00112994	0	2	frameshift_variant|STAP1|p.Pro283fs	0	0	0	0	0	0	0
chr5	65974098	TCATACTC	T	STAP1	0.00112994	0	2	frameshift_variant&splice_region_variant|STAP1|p.Glu77fs	0	0	0	0	0	0	0
chr5	85707075	G	GCTTT	HSD17B13	0.00112994	0	2	frameshift_variant|HSD17B13|p.Ala154fs	0	0	0	0	0	0	0
chr5	86828182	CAG	C	HERC6	0.00112994	0	2	frameshift_variant|HERC6|p.Gly878fs	0	0	0	0	0	0	0
chr5	86851769	TAA	T	HERC5	0.00112994	0	2	frameshift_variant|HERC5|p.Lys230fs	0	0	0	0	0	0	0
chr5	88301705	G	T	MMRN1	0.00112994	0	2	splice_donor_variant&intron_variant|MMRN1|	0	0	0	0	0	0	0
chr5	88344380	C	A	MMRN1	0.00112994	0	2	stop_gained|MMRN1|p.Ser1038*	0	0	0	0	0	0	0
chr5	110861197	GAT	G	ZGRF1	0.00112994	0	2	frameshift_variant|ZGRF1|p.Ser1329fs	0	0	0	0	0	0	0
chr5	110871649	TG	T	ZGRF1	0.00112994	0	2	frameshift_variant|ZGRF1|p.Ser982fs	0	0	0	0	0	0	0
chr5	119500356	G	A	ANXA5	0.00112994	0	2	stop_gained|ANXA5|p.Arg239*	0	0	1	0	0	0	1
chr5	120140194	C	T	KIAA1109	0.00112994	0	2	stop_gained&splice_region_variant|KIAA1109|p.Gln3334*	0	0	0	0	0	0	0
chr5	138368253	G	A	MGAT4D	0.00112994	0	2	stop_gained|MGAT4D|p.Arg69*	0	0	0	0	0	0	0
chr5	151350478	C	T	RNF175	0.00112994	0	2	splice_donor_variant&intron_variant|RNF175|	0	0	0	0	0	0	0
chr5	153484573	A	C	ASIC5	0.00112994	0	2	stop_gained|ASIC5|p.Tyr10*	0	0	0	0	0	0	0
chr5	156315267	AT	A	ENSMMUG00000017768	0.00112994	0	2	frameshift_variant|ENSMMUG00000017768|p.Lys245fs	0	0	0	0	0	0	0
chr5	170600418	G	A	GALNT7	0.00112994	0	2	splice_donor_variant&intron_variant|GALNT7|	0	0	0	0	0	0	0
chr5	182694442	G	A	ANKRD37	0.00112994	0	2	splice_acceptor_variant&intron_variant|ANKRD37|	0	0	0	0	0	0	0
chr5	183515730	C	T	KLKB1	0.00112994	0	2	stop_gained|KLKB1|p.Arg113*	0	1	1	0	0	0	2
chr6	14188376	G	A	DNAH5	0.00112994	0	2	stop_gained|DNAH5|p.Arg16*	0	1	0	1	0	0	2
chr6	53470414	C	T	CDC20B	0.00112994	0	2	stop_gained&splice_region_variant|CDC20B|p.Trp21*	0	0	0	0	0	0	0
chr6	59286112	C	G	ERCC8	0.00112994	0	2	splice_acceptor_variant&intron_variant|ERCC8|	0	1	0	0	0	0	1
chr6	63773600	T	TATGAA	ADAMTS6	0.00112994	0	2	frameshift_variant|ADAMTS6|p.Glu687fs	0	0	0	0	0	0	0
chr6	64826068	CT	C	ENSMMUG00000038355	0.00112994	0	2	frameshift_variant|ENSMMUG00000038355|p.Val88fs	0	0	0	0	0	0	0
chr6	72480252	G	T	POLK	0.00112994	0	2	stop_gained|POLK|p.Gly647*	0	0	1	0	0	0	1
chr6	72542297	C	T	ANKDD1B	0.00112994	0	2	stop_gained|ANKDD1B|p.Gln462*	0	0	0	0	0	0	0
chr6	78046953	AAAAG	A	CKMT2	0.00112994	0	2	frameshift_variant|CKMT2|p.Cys362fs	0	0	1	0	0	0	1
chr6	78942867	C	T	ATG10	0.00112994	0	2	stop_gained|ATG10|p.Gln119*	0	0	0	0	0	0	0
chr6	80330025	CA	C	VCAN	0.00112994	0	2	frameshift_variant|VCAN|p.Ile1516fs	1	0	1	1	0	0	3
chr6	91497180	ATTCAG	A	SLF1	0.00112994	0	2	frameshift_variant|SLF1|p.Gln190fs	0	0	0	0	0	0	0
chr6	93714866	C	A	ERAP2	0.00112994	0	2	stop_gained|ERAP2|p.Ser114*	0	0	0	0	0	0	0
chr6	93728331	G	T	ERAP2	0.00112994	0	2	stop_gained|ERAP2|p.Glu357*	0	0	0	0	0	0	0
chr6	93740777	AG	A	ERAP2	0.00112994	0	2	frameshift_variant|ERAP2|p.Thr596fs	0	0	0	0	0	0	0
chr6	93750890	GA	G	ERAP2	0.00112994	0	2	frameshift_variant|ERAP2|p.Asn809fs	0	0	0	0	0	0	0
chr6	108920630	CCAAA	C	STARD4	0.00112994	0	2	frameshift_variant|STARD4|p.Val40fs	0	0	0	0	0	0	0
chr6	110585145	G	A	MCC	0.00112994	0	2	stop_gained|MCC|p.Gln655*	0	0	0	0	0	0	0
chr6	130264242	T	TC	SHROOM1	0.00112994	0	2	frameshift_variant|SHROOM1|p.Glu750fs	0	0	0	0	0	0	0
chr6	130265702	A	AG	SHROOM1	0.00112994	0	2	frameshift_variant|SHROOM1|p.Leu421fs	0	0	0	0	0	0	0
chr6	136892274	GC	G	STING1	0.00112994	0	2	frameshift_variant|STING1|p.Leu101fs	0	0	0	0	0	0	0
chr6	138433076	A	AG	PCDHB1	0.00112994	0	2	frameshift_variant|PCDHB1|p.Val208fs	0	0	0	0	0	0	0
chr6	147133629	GAC	G	ARHGEF37	0.00112994	0	2	frameshift_variant|ARHGEF37|p.Asp370fs	0	0	0	0	0	0	0
chr6	147716243	G	A	SLC6A7	0.00112994	0	2	splice_donor_variant&intron_variant|SLC6A7|	0	0	1	0	0	0	1
chr6	148396102	C	T	ZNF300	0.00112994	0	2	splice_donor_variant&intron_variant|ZNF300|	0	0	0	0	0	0	0
chr6	157791427	TC	T	SLU7	0.00112994	0	2	frameshift_variant|SLU7|p.Gly433fs	0	0	0	0	1	0	1
chr6	159071308	C	T	GABRA6	0.00112994	0	2	stop_gained|GABRA6|p.Gln340*	0	0	1	0	0	0	1
chr6	160843707	CCATGCAGAA	C	HMMR	0.00112994	0	2	frameshift_variant&splice_acceptor_variant&splice_region_variant&intron_variant|HMMR|p.Lys563fs	0	0	1	0	0	0	1
chr6	160844512	G	A	HMMR	0.00112994	0	2	splice_acceptor_variant&intron_variant|HMMR|	0	0	1	0	0	0	1
chr6	174048168	G	A	CDHR2	0.00112994	0	2	splice_donor_variant&intron_variant|CDHR2|	0	0	0	0	0	0	0
chr6	176990176	GTT	G	HNRNPH1	0.00112994	0	2	frameshift_variant|HNRNPH1|p.Asn440fs	0	0	1	0	0	0	1
chr6	176993477	A	ACCTGTGC	HNRNPH1	0.00112994	0	2	frameshift_variant&splice_region_variant|HNRNPH1|p.Tyr180fs	0	0	1	0	0	0	1
chr7	5660024	TG	T	ENSMMUG00000021656	0.00112994	0	2	frameshift_variant|ENSMMUG00000021656|p.Thr226fs	0	0	0	0	0	0	0
chr7	7323606	C	CT	FAN1	0.00112994	0	2	frameshift_variant|FAN1|p.Arg789fs	0	0	0	0	0	0	0
chr7	7323613	C	CACCTGAA	FAN1	0.00112994	0	2	frameshift_variant|FAN1|p.Cys786fs	0	0	0	0	0	0	0
chr7	8989100	G	GTA	ENSMMUG00000012283	0.00112994	0	2	splice_donor_variant&intron_variant|ENSMMUG00000012283|	0	0	0	0	0	0	0
chr7	10010641	GTATT	G	RYR3	0.00112994	0	2	splice_donor_variant&splice_region_variant&intron_variant|RYR3|	0	0	0	0	0	0	0
chr7	16778254	C	CTG	DISP2	0.00112994	0	2	frameshift_variant|DISP2|p.Gln921fs	0	0	0	0	0	0	0
chr7	17793066	AGGT	A	NUSAP1	0.00112994	0	2	frameshift_variant&splice_donor_variant&splice_region_variant&intron_variant|NUSAP1|p.Asp55fs	0	0	0	1	0	0	1
chr7	18339208	T	C	PLA2G4B	0.00112994	0	2	splice_donor_variant&intron_variant|PLA2G4B|	0	0	0	0	0	0	0
chr7	18365620	C	CTTGG	SPTBN5	0.00112994	0	2	frameshift_variant|SPTBN5|p.Lys1887fs	0	0	0	0	0	0	0
chr7	18644129	AT	A	PLA2G4F	0.00112994	0	2	frameshift_variant|PLA2G4F|p.Tyr44fs	0	0	0	0	0	0	0
chr7	19689349	T	TG	CCNDBP1	0.00112994	0	2	frameshift_variant|CCNDBP1|p.Phe256fs	0	0	0	0	0	0	0
chr7	19782640	G	A	TGM7	0.00112994	0	2	stop_gained|TGM7|p.Arg321*	0	0	0	0	0	0	0
chr7	19819089	T	TG	LCMT2	0.00112994	0	2	frameshift_variant|LCMT2|p.His360fs	0	0	1	0	0	0	1
chr7	20829841	G	A	GOLM2	0.00112994	0	2	splice_acceptor_variant&intron_variant|GOLM2|	0	0	0	0	0	0	0
chr7	24628501	C	T	SLC12A1	0.00112994	0	2	stop_gained|SLC12A1|p.Gln99*	0	1	1	1	0	0	3
chr7	26947007	C	A	USP50	0.00112994	0	2	stop_gained|USP50|p.Glu297*	0	0	0	0	0	0	0
chr7	49026694	C	A	CELF6	0.00112994	0	2	splice_donor_variant&intron_variant|CELF6|	0	0	0	0	0	0	0
chr7	50902683	G	A	ENSMMUG00000045257	0.00112994	0	2	stop_gained|ENSMMUG00000045257|p.Arg451*	0	0	0	0	0	0	0
chr7	51275821	C	G	CCDC33	0.00112994	0	2	stop_gained|CCDC33|p.Tyr130*	0	0	0	0	0	0	0
chr7	51349305	C	T	CYP11A1	0.00112994	0	2	splice_donor_variant&intron_variant|CYP11A1|	0	1	1	1	0	0	3
chr7	52452855	A	ATT	ENSMMUG00000061079	0.00112994	0	2	frameshift_variant|ENSMMUG00000061079|p.Tyr572fs	0	0	0	0	0	0	0
chr7	52822542	G	GAT	CSPG4	0.00112994	0	2	frameshift_variant|CSPG4|p.Val1014fs	1	0	0	0	0	0	1
chr7	56613095	G	A	TMED3	0.00112994	0	2	splice_donor_variant&intron_variant|TMED3|	0	0	0	0	0	0	0
chr7	58664096	CG	C	TMC3	0.00112994	0	2	frameshift_variant|TMC3|p.Val684fs	0	0	0	0	0	0	0
chr7	81812930	AT	A	OR4K2	0.00112994	0	2	frameshift_variant|OR4K2|p.Asn172fs	0	0	0	0	0	0	0
chr7	82238045	CAT	C	TEP1	0.00112994	0	2	frameshift_variant|TEP1|p.His856fs	0	0	0	0	0	0	0
chr7	86324021	T	G	GMPR2	0.00112994	0	2	splice_donor_variant&intron_variant|GMPR2|	0	0	0	0	0	0	0
chr7	86501062	T	A	NYNRIN	0.00112994	0	2	stop_gained|NYNRIN|p.Leu503*	0	0	0	0	0	0	0
chr7	114643086	C	T	TXNDC16	0.00112994	0	2	splice_donor_variant&intron_variant|TXNDC16|	0	0	0	0	0	0	0
chr7	123135891	ATACT	A	SLC38A6	0.00112994	0	2	frameshift_variant|SLC38A6|p.Leu323fs	0	0	0	0	0	0	0
chr7	135379056	G	GCCGA	PAPLN	0.00112994	0	2	frameshift_variant|PAPLN|p.Arg353fs	0	0	0	0	0	0	0
chr7	135392428	AG	A	PAPLN	0.00112994	0	2	frameshift_variant|PAPLN|p.Gly1062fs	0	0	0	0	0	0	0
chr7	135973901	G	T	PTGR2	0.00112994	0	2	splice_donor_variant&intron_variant|PTGR2|	0	0	1	0	0	0	1
chr7	135978433	T	G	PTGR2	0.00112994	0	2	splice_donor_variant&intron_variant|PTGR2|	0	0	1	0	0	0	1
chr7	140020357	C	T	ADCK1	0.00112994	0	2	stop_gained|ADCK1|p.Arg255*	0	0	0	0	0	0	0
chr7	154607616	G	A	SLC24A4	0.00112994	0	2	splice_donor_variant&intron_variant|SLC24A4|	0	0	0	0	0	0	0
chr7	162089906	C	T	EML1	0.00112994	0	2	stop_gained|EML1|p.Arg150*	0	0	0	0	0	0	0
chr8	7919588	A	G	ENSMMUG00000007466	0.00112994	0	2	splice_donor_variant&intron_variant|ENSMMUG00000007466|	0	0	0	0	0	0	0
chr8	18012533	G	A	FGL1	0.00112994	0	2	stop_gained|FGL1|p.Gln149*	0	0	0	0	0	0	0
chr8	22318315	G	A	LGI3	0.00112994	0	2	stop_gained|LGI3|p.Gln149*	0	0	0	0	0	0	0
chr8	22800195	AC	A	CCAR2	0.00112994	0	2	frameshift_variant|CCAR2|p.Arg417fs	0	0	0	0	0	0	0
chr8	24606273	G	C	ADAM28	0.00112994	0	2	splice_donor_variant&intron_variant|ADAM28|	0	0	1	1	0	0	2
chr8	25595111	CAGG	C	DOCK5	0.00112994	1	0	frameshift_variant&splice_acceptor_variant&splice_region_variant&intron_variant|DOCK5|p.Gly440fs	0	0	0	0	0	0	0
chr8	25697134	CTT	C	GNRH1	0.00112994	0	2	frameshift_variant|GNRH1|p.Lys54fs	0	0	0	0	0	0	0
chr8	38334132	C	CT	RAB11FIP1	0.00112994	0	2	frameshift_variant|RAB11FIP1|p.Ala1122fs	0	0	0	0	0	0	0
chr8	40591932	A	G	IDO2	0.00112994	0	2	splice_acceptor_variant&intron_variant|IDO2|	0	0	0	0	0	0	0
chr8	43343241	C	CA	CHRNB3	0.00112994	0	2	frameshift_variant|CHRNB3|p.Lys377fs	0	0	1	0	0	0	1
chr8	53552564	CCTCCTCT	C	NPBWR1	0.00112994	0	2	frameshift_variant|NPBWR1|p.Leu261fs	0	0	0	0	0	0	0
chr8	62215714	C	A	ASPH	0.00112994	0	2	splice_donor_variant&intron_variant|ASPH|	0	0	1	0	0	0	1
chr8	81938475	G	T	FABP9	0.00112994	0	2	stop_gained|FABP9|p.Tyr20*	0	0	0	0	0	0	0
chr8	94722679	A	C	RAD54B	0.00112994	0	2	stop_gained|RAD54B|p.Tyr308*	0	0	0	0	0	0	0
chr8	106980546	G	GT	ABRA	0.00112994	0	2	frameshift_variant|ABRA|p.Asn225fs	0	0	0	0	0	0	0
chr8	109634063	G	T	PKHD1L1	0.00112994	0	2	stop_gained|PKHD1L1|p.Glu1268*	0	0	0	0	0	0	0
chr8	123456824	CAG	C	TBC1D31	0.00112994	0	2	frameshift_variant|TBC1D31|p.Gln876fs	0	0	0	0	0	0	0
chr8	123752975	C	T	NTAQ1	0.00112994	0	2	stop_gained|NTAQ1|p.Arg146*	0	0	0	0	0	0	0
chr8	132369731	C	T	HHLA1	0.00112994	0	2	stop_gained|HHLA1|p.Trp260*	0	0	0	0	0	0	0
chr8	133493451	A	C	CCN4	0.00112994	0	2	splice_acceptor_variant&intron_variant|CCN4|	0	0	0	0	0	0	0
chr8	145232020	C	CG	ENSMMUG00000064857	0.00112994	0	2	frameshift_variant|ENSMMUG00000064857|p.Arg89fs	0	0	0	0	0	0	0
chr9	6376501	CG	C	AKR1C8	0.00112994	0	2	frameshift_variant|AKR1C8|p.Arg32fs	0	0	0	0	0	0	0
chr9	6376572	TG	T	AKR1C8	0.00112994	0	2	frameshift_variant|AKR1C8|p.Asp56fs	0	0	0	0	0	0	0
chr9	6377478	G	A	AKR1C8	0.00112994	0	2	splice_acceptor_variant&intron_variant|AKR1C8|	0	0	0	0	0	0	0
chr9	6620507	G	C	NET1	0.00112994	0	2	splice_donor_variant&intron_variant|NET1|	0	0	0	0	0	0	0
chr9	13346447	TAG	T	CDC123	0.00112994	0	2	splice_acceptor_variant&intron_variant|CDC123|	0	0	0	0	1	0	1
chr9	13346450	TGTCA	T	CDC123	0.00112994	0	2	frameshift_variant&splice_region_variant|CDC123|p.Val26fs	0	0	0	0	1	0	1
chr9	18858500	G	GGT	STAM	0.00112994	0	2	splice_donor_variant&intron_variant|STAM|	0	0	0	0	0	0	0
chr9	20507377	G	GA	MALRD1	0.00112994	0	2	frameshift_variant|MALRD1|p.Gln1402fs	0	0	0	0	0	0	0
chr9	22667687	AAGAG	A	MLLT10	0.00112994	0	2	frameshift_variant|MLLT10|p.Arg145fs	0	0	0	0	0	0	0
chr9	28976454	C	A	MPP7	0.00112994	0	2	stop_gained|MPP7|p.Glu157*	0	0	0	0	0	0	0
chr9	29509898	G	A	WAC	0.00112994	0	2	splice_acceptor_variant&intron_variant|WAC|	0	0	0	0	0	1	1
chr9	40740981	T	G	ANKRD30BL	0.00112994	0	2	splice_acceptor_variant&intron_variant|ANKRD30BL|	0	0	0	0	0	0	0
chr9	41473294	C	T	BMS1	0.00112994	0	2	stop_gained|BMS1|p.Gln30*	0	0	0	0	0	0	0
chr9	47009494	AC	A	ENSMMUG00000052221	0.00112994	0	2	frameshift_variant|ENSMMUG00000052221|p.Val25fs	0	0	0	0	0	0	0
chr9	47641965	A	G	OGDHL	0.00112994	0	2	splice_acceptor_variant&intron_variant|OGDHL|	0	0	0	0	0	0	0
chr9	58079202	C	T	TMEM254	0.00112994	0	2	stop_gained|TMEM254|p.Trp230*	0	0	0	0	0	0	0
chr9	58533103	C	CAG	ZMIZ1	0.00112994	0	2	splice_acceptor_variant&intron_variant|ZMIZ1|	0	0	0	1	0	0	1
chr9	58535020	ACTCAC	A	ZMIZ1	0.00112994	0	2	splice_donor_variant&splice_region_variant&intron_variant|ZMIZ1|	0	0	0	1	0	0	1
chr9	69625272	CCT	C	PBLD	0.00112994	0	2	frameshift_variant|PBLD|p.Ser276fs	0	0	0	0	0	0	0
chr9	87282878	G	A	ASAH2	0.00112994	0	2	stop_gained|ASAH2|p.Arg108*	0	0	0	0	0	0	0
chr9	88002760	G	A	PAPSS2	0.00112994	0	2	splice_donor_variant&intron_variant|PAPSS2|	0	1	0	0	0	0	1
chr9	89964782	AC	A	KIF20B	0.00112994	0	2	frameshift_variant|KIF20B|p.Ser243fs	0	0	0	0	0	0	0
chr9	93534660	GT	G	MYOF	0.00112994	0	2	frameshift_variant|MYOF|p.Asn685fs	0	0	0	0	0	0	0
chr9	94446586	GC	G	PLCE1	0.00112994	0	2	frameshift_variant|PLCE1|p.Ser1606fs	0	1	0	0	0	0	1
chr9	96052006	CTAA	C	ALDH18A1	0.00112994	0	2	splice_acceptor_variant&splice_region_variant&intron_variant|ALDH18A1|	0	1	1	0	0	0	2
chr9	96104115	C	CA	TCTN3	0.00112994	0	2	frameshift_variant|TCTN3|p.Cys255fs	0	0	0	0	0	0	0
chr9	97889797	A	G	EXOSC1	0.00112994	0	2	splice_donor_variant&intron_variant|EXOSC1|	0	0	0	0	0	0	0
chr9	98020209	AC	A	ANKRD2	0.00112994	0	2	frameshift_variant|ANKRD2|p.Arg359fs	0	0	0	0	0	0	0
chr9	98883573	C	CAATGA	HPS1	0.00112994	0	2	frameshift_variant|HPS1|p.Glu163fs	0	1	0	0	0	0	1
chr9	100226265	A	AT	CUTC	0.00112994	0	2	frameshift_variant|CUTC|p.Leu90fs	0	0	0	0	0	0	0
chr9	100275240	G	A	ABCC2	0.00112994	0	2	stop_gained|ABCC2|p.Trp130*	0	1	1	0	0	0	2
chr9	100520189	TC	T	CPN1	0.00112994	0	2	frameshift_variant|CPN1|p.Glu318fs	0	0	1	0	0	0	1
chr9	100974321	C	T	SEC31B	0.00112994	0	2	stop_gained|SEC31B|p.Trp243*	0	0	0	0	0	0	0
chr9	102994506	A	ATC	MFSD13A	0.00112994	0	2	frameshift_variant|MFSD13A|p.Ile300fs	0	0	0	0	0	0	0
chr9	104034051	CA	C	CALHM3	0.00112994	0	2	frameshift_variant|CALHM3|p.Leu154fs	0	0	0	0	0	0	0
chr9	104735249	C	A	CFAP43	0.00112994	0	2	splice_donor_variant&intron_variant|CFAP43|	0	0	0	0	0	0	0
chr9	114810873	AG	A	VWA2	0.00112994	0	2	frameshift_variant|VWA2|p.Ser531fs	0	0	0	0	0	0	0
chr9	116018873	G	GT	ATRNL1	0.00112994	0	2	frameshift_variant|ATRNL1|p.Val1234fs	0	0	0	0	0	0	0
chr9	116958369	CAGTA	C	PNLIPRP3	0.00112994	0	2	frameshift_variant&splice_donor_variant&splice_region_variant&intron_variant|PNLIPRP3|p.Gly310fs	0	0	0	0	0	0	0
chr9	120333671	G	A	MCMBP	0.00112994	0	2	stop_gained|MCMBP|p.Gln198*	0	0	0	0	0	0	0
chr9	120390724	C	T	SEC23IP	0.00112994	0	2	stop_gained|SEC23IP|p.Arg326*	0	0	0	0	0	0	0
chr9	128550830	A	T	MKI67	0.00112994	0	2	stop_gained|MKI67|p.Leu60*	0	0	0	0	0	0	0
chr10	6663247	G	GC	ARHGAP8	0.00112994	0	2	frameshift_variant|ARHGAP8|p.Leu213fs	0	0	0	0	0	0	0
chr10	6762793	G	A	PRR5	0.00112994	0	2	stop_gained&splice_region_variant|PRR5|p.Gln129*	0	0	0	0	0	0	0
chr10	7546855	GGACTT	G	PNPLA3	0.00112994	0	2	frameshift_variant|PNPLA3|p.Lys198fs	0	0	0	0	0	0	0
chr10	8358501	C	CACCCAGG	BIK	0.00112994	0	2	frameshift_variant&splice_region_variant|BIK|p.Ser132fs	0	0	0	0	0	0	0
chr10	9612637	G	A	SREBF2	0.00112994	0	2	stop_gained|SREBF2|p.Arg879*	0	0	0	1	0	0	1
chr10	12975019	G	A	FAM227A	0.00112994	0	2	splice_donor_variant&intron_variant|FAM227A|	0	0	0	0	0	0	0
chr10	19066969	A	T	BPIFC	0.00112994	0	2	stop_gained|BPIFC|p.Lys222*	0	0	0	0	0	0	0
chr10	20378297	G	C	PLA2G3	0.00112994	0	2	splice_acceptor_variant&intron_variant|PLA2G3|	0	0	0	1	0	0	1
chr10	22238492	G	GC	GAS2L1	0.00112994	0	2	frameshift_variant|GAS2L1|p.Pro614fs	0	0	0	0	0	0	0
chr10	22289814	C	CA	RHBDD3	0.00112994	0	2	frameshift_variant|RHBDD3|p.Val225fs	0	0	0	0	0	0	0
chr10	26149268	C	T	PIWIL3	0.00112994	0	2	splice_donor_variant&intron_variant|PIWIL3|	0	0	0	0	0	0	0
chr10	26638401	G	A	CRYBB3	0.00112994	0	2	splice_donor_variant&intron_variant|CRYBB3|	0	1	0	0	0	0	1
chr10	28671939	TAC	T	LRRC75B	0.00112994	0	2	frameshift_variant|LRRC75B|p.Tyr73fs	0	0	0	0	0	0	0
chr10	30979804	T	TC	TOP3B	0.00112994	0	2	frameshift_variant|TOP3B|p.Ile390fs	0	0	0	0	0	0	0
chr10	34509383	C	A	CECR2	0.00112994	0	2	splice_donor_variant&intron_variant|CECR2|	0	0	0	1	0	0	1
chr10	34833750	TGATATTCC	T	ADA2	0.00112994	0	2	frameshift_variant|ADA2|p.Ile77fs	0	0	0	0	0	0	0
chr10	36044525	TTAAA	T	ENSMMUG00000055263	0.00112994	0	2	frameshift_variant|ENSMMUG00000055263|p.Phe355fs	0	0	0	0	0	0	0
chr10	36044530	GC	G	ENSMMUG00000055263	0.00112994	0	2	frameshift_variant|ENSMMUG00000055263|p.Ser354fs	0	0	0	0	0	0	0
chr10	41094846	G	A	NINL	0.00112994	0	2	stop_gained|NINL|p.Trp306*	0	0	0	0	0	0	0
chr10	60592962	C	T	CHGB	0.00112994	0	2	stop_gained|CHGB|p.Trp176*	0	0	0	0	0	0	0
chr10	62795576	T	C	SIGLEC1	0.00112994	0	2	splice_donor_variant&intron_variant|SIGLEC1|	0	0	1	0	0	0	1
chr10	63637305	C	CAT	VPS16	0.00112994	0	2	frameshift_variant|VPS16|p.Ala888fs	0	0	0	0	0	0	0
chr10	63703902	G	A	CPXM1	0.00112994	0	2	splice_acceptor_variant&intron_variant|CPXM1|	0	0	0	0	0	0	0
chr10	64105055	G	A	TGM6	0.00112994	0	2	stop_gained|TGM6|p.Arg166*	0	0	0	0	0	0	0
chr10	64580979	A	AC	ENSMMUG00000018474	0.00112994	0	2	frameshift_variant|ENSMMUG00000018474|p.His371fs	0	0	0	0	0	0	0
chr10	66575256	GAC	G	DEFB116	0.00112994	0	2	frameshift_variant&start_lost|DEFB116|p.Met1fs	0	0	0	0	0	0	0
chr10	67023589	A	AACCT	TPX2	0.00112994	0	2	splice_donor_variant&intron_variant|TPX2|	0	0	0	0	1	0	1
chr10	68273692	A	T	BPIFB6	0.00112994	0	2	stop_gained|BPIFB6|p.Lys53*	0	0	0	0	0	0	0
chr10	68321208	GGT	G	BPIFB4	0.00112994	0	2	frameshift_variant|BPIFB4|p.Glu107fs	0	0	0	0	0	0	0
chr10	68435714	G	T	BPIFA3	0.00112994	0	2	splice_donor_variant&intron_variant|BPIFA3|	0	0	0	0	0	0	0
chr10	68942703	A	T	ZNF341	0.00112994	0	2	stop_gained|ZNF341|p.Lys314*	0	0	0	0	0	0	0
chr10	79566420	C	A	R3HDML	0.00112994	0	2	stop_gained|R3HDML|p.Cys161*	0	0	0	0	0	0	0
chr10	80333466	CA	C	KCNS1	0.00112994	0	2	frameshift_variant|KCNS1|p.Cys224fs	0	0	0	0	0	0	0
chr10	85836949	G	A	RIPOR3	0.00112994	0	2	stop_gained|RIPOR3|p.Arg412*	0	0	0	0	0	0	0
chr10	89237941	A	ATCAAGCT	BCAS1	0.00112994	0	2	frameshift_variant&stop_gained|BCAS1|p.Asp122fs	0	0	0	0	0	0	0
chr10	91603336	AAC	A	CASS4	0.00112994	0	2	frameshift_variant|CASS4|p.Gln664fs	0	0	0	0	0	0	0
chr10	92790758	G	A	ZBP1	0.00112994	0	2	stop_gained|ZBP1|p.Gln108*	0	0	0	0	0	0	0
chr10	95146060	GT	G	CDH26	0.00112994	0	2	frameshift_variant|CDH26|p.His418fs	0	0	0	0	0	0	0
chr10	95147910	G	C	CDH26	0.00112994	0	2	splice_acceptor_variant&intron_variant|CDH26|	0	0	0	0	0	0	0
chr10	97919871	AC	A	NTSR1	0.00112994	0	2	frameshift_variant|NTSR1|p.Tyr364fs	0	0	0	0	0	0	0
chr11	2782776	C	T	CACNA1C	0.00112994	0	2	stop_gained|CACNA1C|p.Arg1954*	0	0	1	1	0	0	2
chr11	7008920	GGTAA	G	GNB3	0.00112994	0	2	frameshift_variant|GNB3|p.Ser72fs	0	0	0	0	0	0	0
chr11	7500537	TC	T	ACSM4	0.00112994	0	2	frameshift_variant|ACSM4|p.Gln243fs	0	0	0	0	0	0	0
chr11	7636973	A	T	CD163L1	0.00112994	0	2	stop_gained|CD163L1|p.Cys73*	0	0	0	0	0	0	0
chr11	9369430	G	T	KLRK1	0.00112994	0	2	splice_acceptor_variant&intron_variant|KLRK1|	0	0	0	0	0	0	0
chr11	9694849	A	C	CLEC12B	0.00112994	0	2	splice_donor_variant&intron_variant|CLEC12B|	0	0	0	0	0	0	0
chr11	10919422	A	G	A2ML1	0.00112994	0	2	splice_donor_variant&intron_variant|A2ML1|	0	0	0	0	0	0	0
chr11	14334176	C	T	GPRC5D	0.00112994	0	2	splice_acceptor_variant&intron_variant|GPRC5D|	0	0	0	0	0	0	0
chr11	16233341	AC	A	ART4	0.00112994	0	2	frameshift_variant|ART4|p.Gly60fs	0	0	0	0	0	0	0
chr11	16233345	G	GATCACCAAA	ART4	0.00112994	0	2	stop_gained&conservative_inframe_insertion|ART4|p.Pro59delinsLeuTrpTerSer	0	0	0	0	0	0	0
chr11	30812540	C	T	OVCH1	0.00112994	0	2	splice_donor_variant&intron_variant|OVCH1|	0	0	0	0	0	0	0
chr11	32789939	TC	T	ETFBKMT	0.00112994	0	2	frameshift_variant|ETFBKMT|p.Gln68fs	0	0	0	0	0	0	0
chr11	42871781	G	A	ADAMTS20	0.00112994	0	2	stop_gained|ADAMTS20|p.Arg1231*	0	0	0	0	0	0	0
chr11	51980620	C	CAGGAAGG	KRT82	0.00112994	0	2	splice_acceptor_variant&intron_variant|KRT82|	0	0	0	0	0	0	0
chr11	55086774	GT	G	OR6C4	0.00112994	0	2	frameshift_variant|OR6C4|p.Tyr111fs	0	0	0	0	0	0	0
chr11	56487159	G	A	ENSMMUG00000060449	0.00112994	0	2	stop_gained|ENSMMUG00000060449|p.Gln48*	0	0	0	0	0	0	0
chr11	68893092	G	GT	LYZ	0.00112994	0	2	frameshift_variant&stop_gained|LYZ|p.Asn93fs	1	0	1	0	0	0	2
chr11	69146863	CAGTT	C	LRRC10	0.00112994	0	2	frameshift_variant|LRRC10|p.Asp181fs	0	0	0	0	0	0	0
chr11	95815733	TA	T	LTA4H	0.00112994	0	2	splice_donor_variant&intron_variant|LTA4H|	0	0	1	0	0	0	1
chr11	100963813	A	AT	SLC5A8	0.00112994	0	2	frameshift_variant|SLC5A8|p.Ser563fs	0	0	0	0	0	0	0
chr11	109106324	C	CCTTCA	KCTD10	0.00112994	0	2	splice_acceptor_variant&intron_variant|KCTD10|	0	0	0	0	0	0	0
chr11	123777414	T	TA	DNAH10	0.00112994	0	2	frameshift_variant|DNAH10|p.Ile2587fs	0	0	0	0	0	0	0
chr11	123811337	T	C	DNAH10	0.00112994	0	2	splice_donor_variant&intron_variant|DNAH10|	0	0	0	0	0	0	0
chr12	703619	CTG	C	ARHGEF4	0.00112994	0	2	frameshift_variant|ARHGEF4|p.Trp1369fs	0	0	0	0	0	0	0
chr12	20150556	CA	C	MAP3K19	0.00112994	0	2	frameshift_variant|MAP3K19|p.Leu207fs	0	0	1	0	0	0	1
chr12	30726036	C	T	ARHGAP15	0.00112994	0	2	stop_gained|ARHGAP15|p.Arg317*	0	0	0	0	0	0	0
chr12	35138528	CTTGTA	C	ORC4	0.00112994	0	2	frameshift_variant&splice_region_variant|ORC4|p.Tyr44fs	0	0	0	0	0	0	0
chr12	36054241	CT	C	ENSMMUG00000031468	0.00112994	0	2	frameshift_variant|ENSMMUG00000031468|p.Gln119fs	0	0	0	0	0	0	0
chr12	36132993	G	A	KIF5C	0.00112994	0	2	splice_donor_variant&intron_variant|KIF5C|	0	0	0	0	0	0	0
chr12	38952890	ACT	A	ARL5A	0.00112994	0	2	splice_acceptor_variant&intron_variant|ARL5A|	0	0	1	0	0	0	1
chr12	46839055	G	A	ENSMMUG00000020721	0.00112994	0	2	stop_gained|ENSMMUG00000020721|p.Gln1674*	0	0	0	0	0	0	0
chr12	46892534	T	TTAGG	ENSMMUG00000020721	0.00112994	0	2	frameshift_variant|ENSMMUG00000020721|p.Ile1063fs	0	0	0	0	0	0	0
chr12	47062597	TA	T	PLA2R1	0.00112994	0	2	frameshift_variant|PLA2R1|p.Tyr652fs	0	0	0	0	0	0	0
chr12	57634219	CA	C	MYO3B	0.00112994	0	2	frameshift_variant|MYO3B|p.Arg1099fs	0	0	0	0	0	0	0
chr12	76847972	CG	C	ASNSD1	0.00112994	0	2	frameshift_variant|ASNSD1|p.Ala603fs	0	0	0	0	0	0	0
chr12	83042517	CCT	C	ENSMMUG00000064727	0.00112994	0	2	frameshift_variant|ENSMMUG00000064727|p.Glu81fs	0	0	0	0	0	0	0
chr12	87682742	T	G	AOX1	0.00112994	0	2	splice_donor_variant&intron_variant|AOX1|	0	0	1	0	0	0	1
chr12	88968960	CT	C	MPP4	0.00112994	0	2	splice_acceptor_variant&intron_variant|MPP4|	0	0	0	0	0	0	0
chr12	97146525	G	T	UNC80	0.00112994	0	2	splice_acceptor_variant&intron_variant|UNC80|	0	0	0	0	0	0	0
chr12	105665322	TG	T	GPBAR1	0.00112994	0	2	frameshift_variant|GPBAR1|p.Asp42fs	0	0	1	0	0	0	1
chr12	105819567	G	GCA	SLC11A1	0.00112994	0	2	splice_donor_variant&intron_variant|SLC11A1|	0	0	0	0	0	0	0
chr12	105844649	C	T	VIL1	0.00112994	0	2	stop_gained|VIL1|p.Gln84*	0	0	0	0	0	0	0
chr12	106458092	C	T	CFAP65	0.00112994	0	2	splice_acceptor_variant&intron_variant|CFAP65|	0	0	0	0	0	0	0
chr12	117837102	C	G	SP140	0.00112994	0	2	stop_gained|SP140|p.Tyr777*	0	0	0	0	0	0	0
chr12	124935938	A	G	MLPH	0.00112994	0	2	splice_acceptor_variant&intron_variant|MLPH|	0	1	0	1	0	0	2
chr12	128351045	G	A	CROCC2	0.00112994	0	2	splice_acceptor_variant&intron_variant|CROCC2|	0	0	0	0	0	0	0
chr12	128535899	T	TA	PASK	0.00112994	0	2	frameshift_variant|PASK|p.Ser998fs	0	0	0	0	0	0	0
chr12	128539281	C	A	PASK	0.00112994	0	2	stop_gained|PASK|p.Glu796*	0	0	0	0	0	0	0
chr13	294713	C	A	PROM2	0.00112994	0	2	stop_gained|PROM2|p.Cys788*	0	0	0	0	0	0	0
chr13	3410709	T	TGG	AFF3	0.00112994	0	2	frameshift_variant|AFF3|p.Asn716fs	0	0	0	0	0	0	0
chr13	4842996	A	AG	TBC1D8	0.00112994	0	2	frameshift_variant|TBC1D8|p.Phe472fs	1	0	0	0	0	0	1
chr13	12468999	G	C	CCDC138	0.00112994	0	2	splice_donor_variant&intron_variant|CCDC138|	0	0	0	0	0	0	0
chr13	23154970	C	CCT	TGOLN2	0.00112994	0	2	frameshift_variant|TGOLN2|p.Arg343fs	0	0	0	0	0	0	0
chr13	34283875	G	A	HTRA2	0.00112994	0	2	stop_gained|HTRA2|p.Arg380*	1	0	0	0	0	0	1
chr13	35316398	AGG	A	ALMS1	0.00112994	0	2	frameshift_variant|ALMS1|p.Ser843fs	0	1	0	0	0	0	1
chr13	37230951	CAGAA	C	DYSF	0.00112994	0	2	frameshift_variant|DYSF|p.Phe866fs	0	1	0	0	0	0	1
chr13	54315428	ATC	A	C13H2orf73	0.00112994	0	2	frameshift_variant|C13H2orf73|p.Glu176fs	0	0	0	0	0	0	0
chr13	71665988	G	A	NDUFAF7	0.00112994	0	2	stop_gained|NDUFAF7|p.Arg342*	0	0	0	0	0	0	0
chr13	76331681	C	CTGAATGTT	BIRC6	0.00112994	0	2	frameshift_variant|BIRC6|p.Glu4457fs	0	0	0	1	0	0	1
chr13	76331682	C	CTGAATGT	BIRC6	0.00112994	0	2	frameshift_variant|BIRC6|p.Glu4457fs	0	0	0	1	0	0	1
chr13	76402273	T	TTAATTATCA	BIRC6	0.00112994	0	2	stop_gained&disruptive_inframe_insertion|BIRC6|p.Arg3146delinsSerAspAsnTer	0	0	0	1	0	0	1
chr13	76402275	T	TTTATA	BIRC6	0.00112994	0	2	frameshift_variant|BIRC6|p.Arg3146fs	0	0	0	1	0	0	1
chr13	80315497	T	TGA	PLB1	0.00112994	0	2	frameshift_variant|PLB1|p.Gln1245fs	0	0	0	0	0	0	0
chr13	81495081	A	T	IFT172	0.00112994	0	2	splice_acceptor_variant&intron_variant|IFT172|	0	0	0	1	0	0	1
chr13	84262624	T	TCTATTTAG	NCOA1	0.00112994	0	2	frameshift_variant&stop_gained&splice_region_variant|NCOA1|p.Arg868fs	0	0	1	0	0	0	1
chr13	97635995	CA	C	C13H2orf50	0.00112994	0	2	frameshift_variant|C13H2orf50|p.Leu136fs	0	0	0	0	0	0	0
chr14	377173	AG	A	IFITM2	0.00112994	0	2	frameshift_variant|IFITM2|p.Leu33fs	0	0	0	0	0	0	0
chr14	826526	TCA	T	GATD1	0.00112994	0	2	frameshift_variant|GATD1|p.Cys154fs	0	0	0	0	0	0	0
chr14	1331033	T	TC	MUC5B	0.00112994	0	2	frameshift_variant|MUC5B|p.Ser4627fs	0	0	0	0	0	0	0
chr14	3520102	C	CT	DHCR7	0.00112994	0	2	frameshift_variant|DHCR7|p.Pro429fs	0	1	1	1	0	0	3
chr14	7517388	C	A	SYT12	0.00112994	0	2	splice_acceptor_variant&intron_variant|SYT12|	0	0	0	0	0	0	0
chr14	9600717	ACTGTG	A	GPHA2	0.00112994	0	2	frameshift_variant|GPHA2|p.His60fs	0	0	0	0	0	0	0
chr14	11066967	TG	T	LGALS12	0.00112994	0	2	frameshift_variant|LGALS12|p.Gln221fs	0	0	0	0	0	0	0
chr14	13791825	AC	A	MS4A7	0.00112994	0	2	splice_acceptor_variant&intron_variant|MS4A7|	0	0	0	0	0	0	0
chr14	19360626	A	G	AMBRA1	0.00112994	0	2	splice_acceptor_variant&intron_variant|AMBRA1|	0	0	0	1	0	0	1
chr14	30579429	G	T	APIP	0.00112994	0	2	stop_gained|APIP|p.Glu169*	0	0	0	0	0	0	0
chr14	37353137	T	G	KIF18A	0.00112994	0	2	splice_donor_variant&intron_variant|KIF18A|	0	0	0	0	0	0	0
chr14	47421925	A	AC	MRGPRX4	0.00112994	0	2	frameshift_variant|MRGPRX4|p.Leu40fs	0	0	0	0	0	0	0
chr14	56758936	T	TG	C14H11orf16	0.00112994	0	2	frameshift_variant|C14H11orf16|p.Lys397fs	0	0	0	0	0	0	0
chr14	62648303	TC	T	TRIM6	0.00112994	0	2	frameshift_variant|TRIM6|p.Lys161fs	0	0	0	0	0	0	0
chr14	71014487	G	A	INTS4	0.00112994	0	2	stop_gained|INTS4|p.Gln312*	0	0	0	0	0	0	0
chr14	78864507	T	TAATA	TMEM126B	0.00112994	0	2	frameshift_variant|TMEM126B|p.Lys100fs	0	0	0	0	0	0	0
chr14	78864512	C	CA	TMEM126B	0.00112994	0	2	frameshift_variant|TMEM126B|p.His101fs	0	0	0	0	0	0	0
chr14	83078876	GA	G	ENSMMUG00000041090	0.00112994	0	2	frameshift_variant|ENSMMUG00000041090|p.Glu89fs	0	0	0	0	0	0	0
chr14	89060631	T	TA	CEP57	0.00112994	0	2	frameshift_variant|CEP57|p.Lys291fs	0	0	0	0	0	0	0
chr14	96449034	T	G	DYNC2H1	0.00112994	0	2	splice_donor_variant&intron_variant|DYNC2H1|	0	1	0	1	0	0	2
chr14	98257300	G	A	CASP5	0.00112994	0	2	stop_gained|CASP5|p.Arg85*	0	0	0	0	0	0	0
chr14	101908391	A	AT	DDX10	0.00112994	0	2	frameshift_variant|DDX10|p.Pro75fs	0	0	0	0	1	0	1
chr14	104660286	G	A	HOATZ	0.00112994	0	2	splice_acceptor_variant&intron_variant|HOATZ|	0	0	0	0	0	0	0
chr14	107795355	G	A	NXPE2	0.00112994	0	2	stop_gained|NXPE2|p.Trp284*	0	0	0	0	0	0	0
chr14	111736081	G	A	TREH	0.00112994	0	2	stop_gained|TREH|p.Arg500*	0	0	0	0	0	0	0
chr14	112026197	CCT	C	UPK2	0.00112994	0	2	frameshift_variant|UPK2|p.Cys51fs	0	0	0	1	0	0	1
chr14	112026221	CCA	C	UPK2	0.00112994	0	2	frameshift_variant|UPK2|p.Leu60fs	0	0	0	1	0	0	1
chr14	112230175	C	T	ABCG4	0.00112994	0	2	stop_gained|ABCG4|p.Gln496*	0	0	0	0	0	0	0
chr14	112261544	C	A	CCDC153	0.00112994	0	2	splice_acceptor_variant&intron_variant|CCDC153|	0	0	0	0	0	0	0
chr14	117226031	C	CGGTT	OR8B8	0.00112994	0	2	frameshift_variant|OR8B8|p.Gly21fs	0	0	0	0	0	0	0
chr15	879665	C	T	EXD3	0.00112994	0	2	stop_gained|EXD3|p.Gln679*	0	0	0	0	0	0	0
chr15	1383108	C	CCA	RABL6	0.00112994	0	2	splice_acceptor_variant&intron_variant|RABL6|	0	0	0	0	0	0	0
chr15	10698519	C	T	TOR1A	0.00112994	0	2	stop_gained|TOR1A|p.Gln352*	1	0	0	1	0	0	2
chr15	11622472	CAA	C	PHYHD1	0.00112994	0	2	frameshift_variant|PHYHD1|p.Phe235fs	0	0	0	0	0	0	0
chr15	16204270	GGA	G	ADGRD2	0.00112994	0	2	frameshift_variant|ADGRD2|p.Ser997fs	0	0	0	0	0	0	0
chr15	16227822	G	T	ADGRD2	0.00112994	0	2	stop_gained|ADGRD2|p.Cys182*	0	0	0	0	0	0	0
chr15	28492743	AGG	A	AKNA	0.00112994	0	2	frameshift_variant|AKNA|p.Glu787fs	0	0	0	0	0	0	0
chr15	28492746	AG	A	AKNA	0.00112994	0	2	frameshift_variant|AKNA|p.Glu788fs	0	0	0	0	0	0	0
chr15	29792872	GA	G	ZFP37	0.00112994	0	2	frameshift_variant|ZFP37|p.Asn162fs	0	0	0	0	0	0	0
chr15	30726653	G	T	SUSD1	0.00112994	0	2	stop_gained|SUSD1|p.Glu452*	0	0	0	0	0	0	0
chr15	31131071	GC	G	SHOC1	0.00112994	0	2	frameshift_variant|SHOC1|p.Ala1433fs	0	0	0	0	0	0	0
chr15	31261517	GA	G	ENSMMUG00000012749	0.00112994	0	2	frameshift_variant|ENSMMUG00000012749|p.Lys140fs	0	0	0	0	0	0	0
chr15	44705177	C	T	TBC1D2	0.00112994	0	2	stop_gained|TBC1D2|p.Gln642*	0	0	0	0	0	0	0
chr15	45606876	G	A	CCDC180	0.00112994	0	2	stop_gained|CCDC180|p.Gln53*	0	0	0	0	0	0	0
chr15	46223239	C	CA	SLC25A51	0.00112994	0	2	frameshift_variant|SLC25A51|p.Ile257fs	0	0	0	0	0	0	0
chr15	47481975	CAT	C	MELK	0.00112994	0	2	frameshift_variant|MELK|p.Met440fs	0	0	1	0	0	0	1
chr15	48336523	TC	T	OR13J1	0.00112994	0	2	frameshift_variant|OR13J1|p.Leu226fs	0	0	0	0	0	0	0
chr15	49189882	C	CTAT	C15H9orf131	0.00112994	0	2	stop_gained&disruptive_inframe_insertion|C15H9orf131|p.Gly13_Asp14insTer	0	0	0	0	0	0	0
chr15	49583481	G	T	DCTN3	0.00112994	0	2	stop_gained|DCTN3|p.Glu15*	0	0	0	0	0	0	0
chr15	50696685	T	TC	ENSMMUG00000038377	0.00112994	0	2	frameshift_variant|ENSMMUG00000038377|p.Asp449fs	0	0	0	0	0	0	0
chr15	66325396	G	T	CNTLN	0.00112994	0	2	splice_donor_variant&intron_variant|CNTLN|	0	0	0	0	0	0	0
chr15	76369239	TC	T	ENSMMUG00000056670	0.00112994	0	2	frameshift_variant|ENSMMUG00000056670|p.Asp58fs	0	0	0	0	0	0	0
chr15	77845215	ACT	A	KIAA2026	0.00112994	0	2	frameshift_variant|KIAA2026|p.Ser1968fs	0	0	0	0	0	0	0
chr15	78548860	G	A	INSL4	0.00112994	0	2	stop_gained|INSL4|p.Arg34*	0	0	0	0	0	0	0
chr15	93608474	ACT	A	CEP78	0.00112994	0	2	frameshift_variant|CEP78|p.Ser715fs	0	0	0	0	0	0	0
chr15	101235664	G	A	GOLM1	0.00112994	0	2	stop_gained|GOLM1|p.Arg323*	0	0	0	0	0	0	0
chr15	109087828	AAT	A	ENSMMUG00000002518	0.00112994	0	2	frameshift_variant|ENSMMUG00000002518|p.Ile110fs	0	0	0	0	0	0	0
chr15	111852984	TTC	T	ERCC6L2	0.00112994	0	2	frameshift_variant|ERCC6L2|p.Arg1066fs	0	0	0	0	0	0	0
chr16	1540274	TGG	T	PRPF8	0.00112994	0	2	frameshift_variant|PRPF8|p.Ala745fs	1	0	0	0	1	0	2
chr16	1540277	C	CAT	PRPF8	0.00112994	0	2	frameshift_variant|PRPF8|p.Ala745fs	1	0	0	0	1	0	2
chr16	1663626	C	CG	SMYD4	0.00112994	0	2	frameshift_variant|SMYD4|p.Arg112fs	0	0	0	0	0	0	0
chr16	2195296	CT	C	TSR1	0.00112994	0	2	frameshift_variant|TSR1|p.Glu442fs	0	0	0	0	1	0	1
chr16	3219129	CAG	C	SPATA22	0.00112994	0	2	frameshift_variant|SPATA22|p.Ser330fs	0	0	0	0	0	0	0
chr16	3506780	A	AT	HASPIN	0.00112994	0	2	frameshift_variant&stop_gained|HASPIN|p.Lys597fs	0	0	1	0	0	0	1
chr16	5296498	C	CCGCG	ENSMMUG00000043771	0.00112994	0	2	frameshift_variant|ENSMMUG00000043771|p.Gly8fs	0	0	0	0	0	0	0
chr16	7170384	GGT	G	TMEM256	0.00112994	0	2	frameshift_variant|TMEM256|p.His47fs	0	0	0	0	0	0	0
chr16	7204158	TC	T	TMEM102	0.00112994	0	2	frameshift_variant|TMEM102|p.Val324fs	0	0	0	0	0	0	0
chr16	7527837	C	CGTAA	DNAH2	0.00112994	0	2	splice_donor_variant&intron_variant|DNAH2|	0	0	0	0	0	0	0
chr16	7717599	T	G	KCNAB3	0.00112994	0	2	splice_acceptor_variant&intron_variant|KCNAB3|	0	0	0	0	0	0	0
chr16	15583169	C	T	ENSMMUG00000005275	0.00112994	0	2	splice_donor_variant&intron_variant|ENSMMUG00000005275|	0	0	0	0	0	0	0
chr16	17960475	AG	A	MYO15A	0.00112994	0	2	frameshift_variant|MYO15A|p.Asp1041fs	0	1	0	0	0	0	1
chr16	20712417	A	ACG	ENSMMUG00000051529	0.00112994	0	2	frameshift_variant|ENSMMUG00000051529|p.Leu174fs	0	0	0	0	0	0	0
chr16	23267752	G	C	ENSMMUG00000017890	0.00112994	0	2	splice_acceptor_variant&intron_variant|ENSMMUG00000017890|	0	0	0	0	0	0	0
chr16	31920775	TGA	T	PEX12	0.00112994	0	2	frameshift_variant|PEX12|p.Ser266fs	0	0	0	0	0	0	0
chr16	32165545	G	C	TAF15	0.00112994	0	2	splice_donor_variant&intron_variant|TAF15|	0	0	0	0	0	0	0
chr16	37780877	G	T	TRIM37	0.00112994	0	2	splice_donor_variant&intron_variant|TRIM37|	0	1	0	0	0	0	1
chr16	46025636	CAG	C	ANKRD40CL	0.00112994	0	2	frameshift_variant|ANKRD40CL|p.Arg15fs	0	0	0	0	0	0	0
chr16	50652102	G	GCAT	CDK12	0.00112994	0	2	splice_donor_variant&intron_variant|CDK12|	0	0	0	0	0	0	0
chr16	51073414	G	A	LRRC3C	0.00112994	0	2	splice_donor_variant&intron_variant|LRRC3C|	0	0	0	0	0	0	0
chr16	51905920	G	A	KRT25	0.00112994	0	2	stop_gained|KRT25|p.Arg256*	0	0	0	0	0	0	0
chr16	52034277	G	A	KRT20	0.00112994	0	2	stop_gained|KRT20|p.Gln209*	0	0	0	0	0	0	0
chr16	52945706	AT	A	NT5C3B	0.00112994	0	2	frameshift_variant|NT5C3B|p.Ile79fs	0	0	0	0	0	0	0
chr16	53976790	C	T	AOC2	0.00112994	0	2	stop_gained|AOC2|p.Arg390*	0	0	0	0	0	0	0
chr16	56510358	T	TC	FMNL1	0.00112994	0	2	frameshift_variant|FMNL1|p.Leu1089fs	0	0	0	0	0	0	0
chr16	58802362	G	A	EFCAB3	0.00112994	0	2	splice_donor_variant&intron_variant|EFCAB3|	0	0	0	0	0	0	0
chr16	63022964	CAGTA	C	PRKCA	0.00112994	0	2	frameshift_variant&splice_donor_variant&splice_region_variant&intron_variant|PRKCA|p.Thr134fs	0	0	1	0	0	0	1
chr16	65258819	TC	T	ABCA8	0.00112994	0	2	frameshift_variant|ABCA8|p.Glu497fs	0	0	0	0	0	0	0
chr16	65315352	C	T	ABCA9	0.00112994	0	2	splice_donor_variant&intron_variant|ABCA9|	0	0	0	0	0	0	0
chr16	65448966	C	T	ABCA6	0.00112994	0	2	stop_gained&splice_region_variant|ABCA6|p.Trp265*	0	0	0	0	0	0	0
chr16	65947358	T	TAC	ENSMMUG00000003076	0.00112994	0	2	frameshift_variant|ENSMMUG00000003076|p.Lys78fs	0	0	0	0	0	0	0
chr16	71971270	TG	T	ENSMMUG00000013436	0.00112994	0	2	frameshift_variant|ENSMMUG00000013436|p.Asp140fs	0	0	0	0	0	0	0
chr16	71971272	A	ATG	ENSMMUG00000013436	0.00112994	0	2	frameshift_variant|ENSMMUG00000013436|p.His141fs	0	0	0	0	0	0	0
chr16	71997187	T	TG	RECQL5	0.00112994	0	2	frameshift_variant|RECQL5|p.Lys661fs	0	0	0	0	0	0	0
chr16	72347328	T	C	ACOX1	0.00112994	0	2	splice_acceptor_variant&intron_variant|ACOX1|	0	1	1	0	0	0	2
chr16	72471655	TCC	T	ZACN	0.00112994	0	2	frameshift_variant|ZACN|p.Ser69fs	0	0	0	0	0	0	0
chr16	72471657	C	CGTTT	ZACN	0.00112994	0	2	frameshift_variant&stop_gained|ZACN|p.Asn70fs	0	0	0	0	0	0	0
chr16	72873045	CA	C	AANAT	0.00112994	0	2	frameshift_variant|AANAT|p.Ser190fs	0	0	1	0	0	0	1
chr16	76055852	T	TC	ENPP7	0.00112994	0	2	frameshift_variant|ENPP7|p.Glu386fs	0	0	0	0	0	0	0
chr17	10275069	T	TA	B3GLCT	0.00112994	0	2	frameshift_variant|B3GLCT|p.Ser162fs	0	0	0	0	0	0	0
chr17	21452613	G	A	EPSTI1	0.00112994	0	2	stop_gained|EPSTI1|p.Arg291*	0	0	0	0	0	0	0
chr17	21654105	C	T	DNAJC15	0.00112994	0	2	stop_gained|DNAJC15|p.Arg95*	0	0	0	0	0	0	0
chr17	27706951	C	T	CDADC1	0.00112994	0	2	stop_gained|CDADC1|p.Gln6*	0	0	0	0	0	0	0
chr17	30546244	ACAGG	A	NEK5	0.00112994	0	2	frameshift_variant|NEK5|p.Pro511fs	0	0	1	0	0	0	1
chr17	31533804	C	T	OLFM4	0.00112994	0	2	stop_gained|OLFM4|p.Arg216*	0	0	0	0	0	0	0
chr17	57617102	G	T	LMO7	0.00112994	0	2	splice_acceptor_variant&intron_variant|LMO7|	0	0	0	1	0	0	1
chr17	59430890	T	C	SCEL	0.00112994	0	2	splice_donor_variant&intron_variant|SCEL|	0	0	0	0	0	0	0
chr18	16109187	CA	C	SERPINB8	0.00112994	0	2	frameshift_variant|SERPINB8|p.Leu85fs	0	0	0	0	0	0	0
chr18	16470940	G	A	ENSMMUG00000042415	0.00112994	0	2	stop_gained|ENSMMUG00000042415|p.Trp201*	0	0	0	0	0	0	0
chr18	16471384	G	A	ENSMMUG00000042415	0.00112994	0	2	splice_donor_variant&intron_variant|ENSMMUG00000042415|	0	0	0	0	0	0	0
chr18	18059957	CT	C	PIGN	0.00112994	0	2	frameshift_variant|PIGN|p.Val870fs	0	0	0	0	0	0	0
chr18	27958438	G	A	POLI	0.00112994	0	2	stop_gained|POLI|p.Arg415*	0	0	0	0	0	0	0
chr18	32899302	AG	A	ENSMMUG00000038584	0.00112994	0	2	frameshift_variant|ENSMMUG00000038584|p.Ser216fs	0	0	0	0	0	0	0
chr18	36514028	CA	C	EPG5	0.00112994	0	2	frameshift_variant|EPG5|p.Val511fs	0	0	0	0	0	0	0
chr18	47264290	CTG	C	ZNF397	0.00112994	0	2	frameshift_variant|ZNF397|p.Thr419fs	0	0	0	0	0	0	0
chr18	50773652	T	TA	SLC25A52	0.00112994	0	2	frameshift_variant&stop_gained|SLC25A52|p.Tyr286fs	0	0	0	0	0	0	0
chr18	59143229	C	T	CABLES1	0.00112994	0	2	splice_donor_variant&intron_variant|CABLES1|	0	0	0	0	0	0	0
chr18	61995518	C	T	ENOSF1	0.00112994	0	2	stop_gained|ENOSF1|p.Trp123*	0	0	0	0	0	0	0
chr19	401836	G	A	POLRMT	0.00112994	0	2	stop_gained|POLRMT|p.Gln74*	0	0	0	0	1	0	1
chr19	846447	CCTGCAGG	C	ARHGAP45	0.00112994	0	2	frameshift_variant&splice_acceptor_variant&splice_region_variant&intron_variant|ARHGAP45|p.Gly264fs	0	0	0	0	0	0	0
chr19	1036055	A	G	MIDN	0.00112994	0	2	splice_acceptor_variant&intron_variant|MIDN|	0	0	0	0	0	0	0
chr19	1324712	TG	T	ENSMMUG00000048694	0.00112994	1	0	frameshift_variant|ENSMMUG00000048694|p.Glu242fs	0	0	0	0	0	0	0
chr19	3513252	G	A	CACTIN	0.00112994	0	2	stop_gained|CACTIN|p.Arg105*	0	0	0	0	0	0	0
chr19	3643999	C	CG	APBA3	0.00112994	0	2	frameshift_variant|APBA3|p.Ala432fs	0	0	0	0	0	0	0
chr19	4004293	G	A	MAP2K2	0.00112994	0	2	stop_gained|MAP2K2|p.Arg185*	1	0	1	0	0	0	2
chr19	4796044	TG	T	PLIN3	0.00112994	0	2	frameshift_variant|PLIN3|p.His137fs	0	0	1	0	0	0	1
chr19	5854617	AT	A	CAPS	0.00112994	0	2	frameshift_variant|CAPS|p.Phe217fs	0	0	1	0	0	0	1
chr19	8048125	GC	G	FBN3	0.00112994	0	2	frameshift_variant|FBN3|p.Leu490fs	0	0	1	0	0	0	1
chr19	9249197	G	GAA	ZNF560	0.00112994	0	2	frameshift_variant|ZNF560|p.Leu251fs	0	0	0	0	0	0	0
chr19	11963267	TG	T	ZNF44	0.00112994	0	2	frameshift_variant|ZNF44|p.Tyr751fs	0	0	0	0	0	0	0
chr19	12542441	C	CCCTCT	GADD45GIP1	0.00112994	0	2	frameshift_variant&splice_region_variant|GADD45GIP1|p.Glu118fs	0	0	0	1	0	0	1
chr19	15026100	T	TGGGTTTTG	WIZ	0.00112994	0	2	frameshift_variant|WIZ|p.Ser423fs	0	0	0	0	0	0	0
chr19	15026104	C	CAGGGTTT	WIZ	0.00112994	0	2	frameshift_variant|WIZ|p.Gly421fs	0	0	0	0	0	0	0
chr19	15397323	G	GT	ENSMMUG00000052449	0.00112994	0	2	frameshift_variant|ENSMMUG00000052449|p.Phe109fs	0	0	0	0	0	0	0
chr19	17699359	T	G	IFI30	0.00112994	0	2	stop_gained|IFI30|p.Leu32*	0	0	0	0	0	0	0
chr19	19859323	T	A	ZNF737	0.00112994	0	2	splice_acceptor_variant&intron_variant|ZNF737|	0	0	0	0	0	0	0
chr19	22564791	TA	T	ZNF726	0.00112994	0	2	frameshift_variant|ZNF726|p.Thr372fs	0	0	0	0	0	0	0
chr19	35034460	C	T	HAUS5	0.00112994	0	2	stop_gained|HAUS5|p.Gln123*	0	0	0	0	1	0	1
chr19	35800936	GT	G	ZFP82	0.00112994	0	2	frameshift_variant|ZFP82|p.Arg488fs	0	0	0	0	0	0	0
chr19	39266456	A	ACTTT	ZNF546	0.00112994	0	2	frameshift_variant|ZNF546|p.Lys453fs	0	0	0	0	0	0	0
chr19	41958585	T	C	ENSMMUG00000050799	0.00112994	1	0	splice_acceptor_variant&intron_variant|ENSMMUG00000050799|	0	0	0	0	0	0	0
chr19	45936324	C	T	SYMPK	0.00112994	0	2	splice_donor_variant&intron_variant|SYMPK|	0	0	0	0	1	0	1
chr19	48039112	TCA	T	PLA2G4C	0.00112994	0	2	frameshift_variant|PLA2G4C|p.Met377fs	0	0	0	0	0	0	0
chr19	50260460	AGGTGAGG	A	NAPSA	0.00112994	0	2	frameshift_variant|NAPSA|p.Leu248fs	0	0	0	1	0	0	1
chr19	50419148	TC	T	ASPDH	0.00112994	0	2	frameshift_variant|ASPDH|p.Ser267fs	0	0	0	0	0	0	0
chr19	53583940	TC	T	NLRP12	0.00112994	0	2	splice_acceptor_variant&intron_variant|NLRP12|	1	0	0	0	0	0	1
chr19	53822236	G	A	TARM1	0.00112994	0	2	stop_gained|TARM1|p.Gln205*	0	0	0	0	0	0	0
chr19	53822244	A	ATG	TARM1	0.00112994	0	2	frameshift_variant|TARM1|p.Val202fs	0	0	0	0	0	0	0
chr19	54930190	GGGGCA	G	PTPRH	0.00112994	0	2	frameshift_variant|PTPRH|p.Cys635fs	0	0	0	0	0	0	0
chr20	758777	G	A	HAGHL	0.00112994	0	2	splice_acceptor_variant&intron_variant|HAGHL|	0	0	0	0	0	0	0
chr20	1798720	C	CT	EME2	0.00112994	0	2	frameshift_variant|EME2|p.Ala255fs	0	0	0	0	0	0	0
chr20	2076007	G	A	NTHL1	0.00112994	0	2	stop_gained|NTHL1|p.Gln95*	0	0	0	0	0	0	0
chr20	3703949	CTG	C	TRAP1	0.00112994	0	2	frameshift_variant|TRAP1|p.Thr522fs	0	0	0	0	0	0	0
chr20	5131113	AT	A	C20H16orf89	0.00112994	0	2	frameshift_variant|C20H16orf89|p.Leu359fs	0	0	0	0	0	0	0
chr20	11364487	C	A	ENSMMUG00000000566	0.00112994	0	2	stop_gained|ENSMMUG00000000566|p.Glu2306*	0	0	0	0	0	0	0
chr20	11413529	C	A	ENSMMUG00000000566	0.00112994	0	2	splice_donor_variant&intron_variant|ENSMMUG00000000566|	0	0	0	0	0	0	0
chr20	11463133	C	T	ENSMMUG00000000566	0.00112994	0	2	stop_gained|ENSMMUG00000000566|p.Trp297*	0	0	0	0	0	0	0
chr20	11794228	G	A	RSL1D1	0.00112994	0	2	stop_gained|RSL1D1|p.Arg291*	0	0	0	0	0	0	0
chr20	19522676	C	T	ERI2	0.00112994	0	2	stop_gained|ERI2|p.Trp227*	0	0	0	0	0	0	0
chr20	20590563	GGT	G	POLR3E	0.00112994	0	2	splice_donor_variant&intron_variant|POLR3E|	0	0	0	0	0	0	0
chr20	28872781	C	T	ITGAX	0.00112994	0	2	stop_gained|ITGAX|p.Arg961*	0	0	1	0	0	0	1
chr20	45013209	G	A	KIFC3	0.00112994	0	2	stop_gained|KIFC3|p.Arg160*	0	0	0	0	0	0	0
chr20	55479809	G	A	PLA2G15	0.00112994	0	2	stop_gained|PLA2G15|p.Trp34*	0	0	0	0	0	0	0
chr20	59547442	GCTGTGGAC	G	PKD1L3	0.00112994	0	2	frameshift_variant|PKD1L3|p.Val847fs	0	0	0	0	0	0	0
chr20	62084496	A	G	LDHD	0.00112994	0	2	splice_donor_variant&intron_variant|LDHD|	0	0	0	0	0	0	0
chr20	68383073	G	GGC	GAN	0.00112994	0	2	splice_donor_variant&intron_variant|GAN|	0	1	0	0	0	0	1
chr20	72816492	C	CAGGG	EMC8	0.00112994	0	2	splice_acceptor_variant&intron_variant|EMC8|	0	0	0	0	0	0	0
chr20	74306243	CT	C	C16orf95	0.00112994	0	2	frameshift_variant|C16orf95|p.Lys109fs	0	0	0	0	0	0	0
chrX	2507166	G	T	ARSD	0.00112994	1	0	stop_gained|ARSD|p.Tyr218*	0	0	0	0	0	0	0
chrX	16338478	T	TA	S100G	0.00112994	1	0	frameshift_variant|S100G|p.Ser6fs	0	0	1	0	0	0	1
chrX	19930791	A	G	RPS6KA3	0.00112994	0	2	splice_donor_variant&intron_variant|RPS6KA3|	0	0	1	0	0	1	2
chrX	76802658	C	T	TBX22	0.00112994	1	0	stop_gained|TBX22|p.Arg223*	0	0	0	1	0	1	2
chrX	97839435	G	A	TRMT2B	0.00112994	1	0	stop_gained|TRMT2B|p.Arg162*	0	0	0	0	0	0	0
chrX	111681680	C	G	LRCH2	0.00112994	0	2	splice_acceptor_variant&intron_variant|LRCH2|	0	0	0	0	0	0	0
chrX	112802529	AT	A	SLC6A14	0.00112994	1	0	frameshift_variant|SLC6A14|p.Trp408fs	0	0	1	0	0	0	1
chrX	121287878	GC	G	ENSMMUG00000018157	0.00112994	0	2	frameshift_variant|ENSMMUG00000018157|p.Glu68fs	0	0	0	0	0	0	0
chrX	126324660	C	CCTCTCA	ELF4	0.00112994	0	2	splice_acceptor_variant&intron_variant|ELF4|	0	0	0	0	0	0	0
ML143117.1	714427	GTC	G	ENSMMUG00000053557	0.00112994	0	2	frameshift_variant|ENSMMUG00000053557|p.Leu65fs	0	0	0	0	0	0	0
QNVO02000437.1	52870	AG	A	ENSMMUG00000061499	0.00112994	0	2	frameshift_variant&splice_region_variant|ENSMMUG00000061499|p.Ala331fs	0	0	0	0	0	0	0
QNVO02000440.1	57227	G	A	ENSMMUG00000059242	0.00112994	0	2	stop_gained|ENSMMUG00000059242|p.Arg473*	0	0	0	0	0	0	0
QNVO02000253.1	34786	TGGGTCTGG	T	ENSMMUG00000050201	0.00112994	0	2	frameshift_variant|ENSMMUG00000050201|p.Pro478fs	0	0	0	0	0	0	0
QNVO02002104.1	40604	G	GGA	ENSMMUG00000014129	0.00112994	0	2	frameshift_variant|ENSMMUG00000014129|p.Ser226fs	0	0	0	0	0	0	0
chr1	1961657	C	T	ZNF670	0.00169492	0	3	stop_gained|ZNF670|p.Gln34*	0	0	0	0	0	0	0
chr1	19707061	CCT	C	RAB4A	0.00169492	0	3	frameshift_variant|RAB4A|p.Asn162fs	0	0	0	0	0	0	0
chr1	25183054	TG	T	ADCY10	0.00169492	0	3	frameshift_variant|ADCY10|p.Gln1203fs	0	0	0	0	0	0	0
chr1	26866689	G	GTT	F5	0.00169492	0	3	frameshift_variant|F5|p.Pro1213fs	0	1	1	1	0	0	3
chr1	37920945	GC	G	ENSMMUG00000016234	0.00169492	0	3	frameshift_variant|ENSMMUG00000016234|p.Ala147fs	0	0	0	0	0	0	0
chr1	39838382	C	T	RNASEL	0.00169492	0	3	stop_gained|RNASEL|p.Trp343*	1	0	0	0	0	0	1
chr1	42085100	C	T	NIBAN1	0.00169492	0	3	splice_donor_variant&intron_variant|NIBAN1|	0	0	0	0	0	0	0
chr1	62580258	T	G	CNTN2	0.00169492	0	3	splice_donor_variant&intron_variant|CNTN2|	0	0	0	0	0	0	0
chr1	80196576	C	A	HHIPL2	0.00169492	0	3	stop_gained|HHIPL2|p.Glu59*	0	0	0	0	0	0	0
chr1	86002370	TC	T	H3	0.00169492	0	3	frameshift_variant|H3|p.Asp78fs	0	0	0	0	0	0	0
chr1	86002401	AG	A	H3	0.00169492	0	3	frameshift_variant|H3|p.Phe68fs	0	0	0	0	0	0	0
chr1	91117202	C	T	SLAMF8	0.00169492	0	3	stop_gained|SLAMF8|p.Trp7*	0	0	0	0	0	0	0
chr1	92308358	G	A	SPTA1	0.00169492	0	3	stop_gained|SPTA1|p.Trp1515*	0	1	0	1	0	0	2
chr1	93156863	TG	T	CD5L	0.00169492	0	3	frameshift_variant|CD5L|p.Trp159fs	0	0	0	0	0	0	0
chr1	99845502	C	T	PSMD4	0.00169492	0	3	splice_acceptor_variant&intron_variant|PSMD4|	0	0	0	1	1	0	2
chr1	104476423	G	A	REG4	0.00169492	0	3	splice_donor_variant&intron_variant|REG4|	0	0	0	0	0	0	0
chr1	104486821	G	A	REG4	0.00169492	0	3	stop_gained|REG4|p.Trp105*	0	0	0	0	0	0	0
chr1	104937233	T	C	HAO2	0.00169492	0	3	splice_acceptor_variant&intron_variant|HAO2|	0	0	1	0	0	0	1
chr1	107242226	C	T	CD101	0.00169492	0	3	stop_gained|CD101|p.Trp713*	0	0	0	0	0	0	0
chr1	115837187	ATG	A	ENSMMUG00000042232	0.00169492	0	3	frameshift_variant|ENSMMUG00000042232|p.His299fs	0	0	0	0	0	0	0
chr1	131192556	A	AC	ENSMMUG00000040115	0.00169492	0	3	frameshift_variant|ENSMMUG00000040115|p.Met79fs	0	0	0	0	0	0	0
chr1	138551455	T	C	COL24A1	0.00169492	0	3	splice_donor_variant&intron_variant|COL24A1|	0	0	0	0	0	0	0
chr1	155679387	G	A	ENSMMUG00000007527	0.00169492	0	3	stop_gained|ENSMMUG00000007527|p.Trp23*	0	0	0	0	0	0	0
chr1	167543094	T	A	C8A	0.00169492	0	3	stop_gained|C8A|p.Lys204*	1	0	1	0	0	0	2
chr1	167548476	A	G	C8A	0.00169492	0	3	splice_donor_variant&intron_variant|C8A|	1	0	1	0	0	0	2
chr1	170221437	C	A	CYB5RL	0.00169492	0	3	stop_gained|CYB5RL|p.Ser65*	0	0	0	0	0	0	0
chr1	178854810	CT	C	AKR1A1	0.00169492	0	3	frameshift_variant|AKR1A1|p.Lys153fs	0	0	1	0	0	0	1
chr1	188261877	G	A	SH3D21	0.00169492	0	3	stop_gained|SH3D21|p.Gln312*	0	0	0	0	0	0	0
chr1	198737492	TCTTTA	T	TRIM63	0.00169492	0	3	frameshift_variant|TRIM63|p.Thr309fs	0	0	0	0	0	0	0
chr1	199495069	CGA	C	RSRP1	0.00169492	0	3	frameshift_variant|RSRP1|p.Arg102fs	0	0	0	0	0	0	0
chr1	201826620	C	CT	LACTBL1	0.00169492	0	3	frameshift_variant|LACTBL1|p.Tyr288fs	0	0	0	0	0	0	0
chr1	202947065	A	AG	LDLRAD2	0.00169492	0	3	frameshift_variant|LDLRAD2|p.Tyr175fs	0	0	0	0	0	0	0
chr1	207818549	ACT	A	CROCC	0.00169492	1	1	frameshift_variant|CROCC|p.Glu947fs	0	0	0	0	0	0	0
chr1	211311902	TACCTTTCTC	T	PDPN	0.00169492	0	3	frameshift_variant&splice_donor_variant&splice_region_variant&intron_variant|PDPN|p.Glu122fs	0	0	0	1	0	0	1
chr1	211651083	AG	A	ENSMMUG00000057550	0.00169492	0	3	frameshift_variant|ENSMMUG00000057550|p.Cys212fs	0	0	0	0	0	0	0
chr2	580912	G	A	ENSMMUG00000047184	0.00169492	0	3	stop_gained|ENSMMUG00000047184|p.Gln1074*	0	0	0	0	0	0	0
chr2	4673909	TC	T	ATP13A5	0.00169492	0	3	frameshift_variant|ATP13A5|p.Cys985fs	0	0	0	0	0	0	0
chr2	31485249	CTG	C	GALNT15	0.00169492	0	3	frameshift_variant|GALNT15|p.Thr242fs	0	0	0	0	0	0	0
chr2	32716275	TC	T	COL6A5	0.00169492	0	3	frameshift_variant|COL6A5|p.His839fs	0	0	0	0	0	0	0
chr2	32765981	C	CA	COL6A5	0.00169492	0	3	frameshift_variant|COL6A5|p.Asp1927fs	0	0	0	0	0	0	0
chr2	32956922	A	C	COL6A6	0.00169492	0	3	splice_acceptor_variant&intron_variant|COL6A6|	0	0	0	0	0	0	0
chr2	48728910	TCTTAC	T	PLSCR5	0.00169492	0	3	splice_donor_variant&splice_region_variant&intron_variant|PLSCR5|	0	0	0	0	0	0	0
chr2	72178302	G	A	ZBBX	0.00169492	0	3	stop_gained|ZBBX|p.Arg50*	0	0	0	0	0	0	0
chr2	75899565	CT	C	SLC2A2	0.00169492	0	3	frameshift_variant|SLC2A2|p.Arg185fs	0	1	1	1	0	0	3
chr2	89340396	C	T	HTR3C	0.00169492	0	3	stop_gained|HTR3C|p.Gln168*	0	0	1	0	0	0	1
chr2	94325796	A	T	SCN11A	0.00169492	0	3	stop_gained|SCN11A|p.Leu1139*	0	0	1	0	0	0	1
chr2	105092239	ACT	A	DALRD3	0.00169492	0	3	frameshift_variant|DALRD3|p.Gln382fs	0	0	0	0	0	0	0
chr2	105451377	A	T	GPX1	0.00169492	0	3	splice_donor_variant&intron_variant|GPX1|	0	1	1	0	0	0	2
chr2	108127595	CA	C	ACY1	0.00169492	0	3	frameshift_variant|ACY1|p.Arg210fs	0	1	1	0	0	0	2
chr2	132709094	C	CA	CNTN6	0.00169492	0	3	frameshift_variant|CNTN6|p.Ser611fs	0	0	0	0	0	0	0
chr2	135616035	C	T	SETMAR	0.00169492	0	3	stop_gained|SETMAR|p.Arg123*	0	0	0	0	0	0	0
chr2	140008055	T	TCTGG	SSUH2	0.00169492	0	3	frameshift_variant|SSUH2|p.Glu358fs	0	0	0	0	0	0	0
chr2	140008056	GCA	G	SSUH2	0.00169492	0	3	frameshift_variant|SSUH2|p.Ala357fs	0	0	0	0	0	0	0
chr2	140800218	T	C	SETD5	0.00169492	0	3	splice_donor_variant&intron_variant|SETD5|	0	0	0	0	0	1	1
chr2	142709587	G	T	ATG7	0.00169492	0	3	stop_gained|ATG7|p.Glu161*	0	0	0	1	0	0	1
chr2	153206416	G	A	PDIA5	0.00169492	0	3	stop_gained|PDIA5|p.Arg200*	0	0	0	0	0	0	0
chr2	153739320	GC	G	PARP15	0.00169492	0	3	frameshift_variant|PARP15|p.Gly48fs	0	0	1	0	0	0	1
chr2	154639209	C	T	GOLGB1	0.00169492	0	3	stop_gained|GOLGB1|p.Gln2194*	0	0	0	0	0	0	0
chr2	154715184	GT	G	FBXO40	0.00169492	0	3	frameshift_variant|FBXO40|p.Thr187fs	0	0	0	0	0	0	0
chr2	175311428	A	G	ABI3BP	0.00169492	0	3	splice_acceptor_variant&intron_variant|ABI3BP|	0	0	0	0	0	0	0
chr2	176182417	C	T	FILIP1L	0.00169492	0	3	stop_gained|FILIP1L|p.Arg107*	0	0	0	0	0	0	0
chr3	5213246	TC	T	MX1	0.00169492	0	3	frameshift_variant|MX1|p.Glu140fs	0	0	0	0	0	0	0
chr3	6844988	TAC	T	IGSF5	0.00169492	0	3	splice_donor_variant&intron_variant|IGSF5|	0	0	0	0	0	0	0
chr3	37931343	C	T	RADIL	0.00169492	0	3	splice_donor_variant&intron_variant|RADIL|	0	0	0	0	0	0	0
chr3	67065616	CA	C	ABCA13	0.00169492	0	3	frameshift_variant|ABCA13|p.Trp1820fs	0	0	0	0	0	0	0
chr3	67114924	T	C	ABCA13	0.00169492	0	3	splice_acceptor_variant&intron_variant|ABCA13|	0	0	0	0	0	0	0
chr3	71143886	GA	G	POLM	0.00169492	0	3	frameshift_variant|POLM|p.Asp263fs	0	0	0	0	0	0	0
chr3	74781477	A	T	SUGCT	0.00169492	0	3	stop_gained|SUGCT|p.Tyr287*	0	0	0	0	0	0	0
chr3	88960572	TTC	T	NFE2L3	0.00169492	0	3	frameshift_variant|NFE2L3|p.Lys636fs	0	0	0	0	0	0	0
chr3	102535503	C	T	ENSMMUG00000055790	0.00169492	0	3	stop_gained|ENSMMUG00000055790|p.Trp41*	0	0	0	0	0	0	0
chr3	102710344	G	A	VWDE	0.00169492	0	3	stop_gained|VWDE|p.Trp116*	0	0	0	0	0	0	0
chr3	114124288	G	GC	AKAP9	0.00169492	0	3	frameshift_variant|AKAP9|p.Ser905fs	1	0	0	0	0	0	1
chr3	114124289	A	ATT	AKAP9	0.00169492	0	3	frameshift_variant|AKAP9|p.Ser905fs	1	0	0	0	0	0	1
chr3	114124296	GAAAA	G	AKAP9	0.00169492	0	3	frameshift_variant|AKAP9|p.Ile901fs	1	0	0	0	0	0	1
chr3	114124302	C	CAAGT	AKAP9	0.00169492	0	3	frameshift_variant|AKAP9|p.Ile901fs	1	0	0	0	0	0	1
chr3	114124338	C	CCCTA	AKAP9	0.00169492	0	3	frameshift_variant|AKAP9|p.Leu888fs	1	0	0	0	0	0	1
chr3	117856513	T	G	STEAP4	0.00169492	0	3	stop_gained|STEAP4|p.Tyr316*	0	0	0	0	0	0	0
chr3	121137430	G	GAGAGC	SEMA3D	0.00169492	0	3	splice_donor_variant&intron_variant|SEMA3D|	0	0	0	0	0	0	0
chr3	132292142	A	AC	CDHR3	0.00169492	0	3	frameshift_variant|CDHR3|p.Gly58fs	0	0	0	0	0	0	0
chr3	154766956	T	TGCAA	RBM28	0.00169492	0	3	frameshift_variant&splice_region_variant|RBM28|p.Gln601fs	0	1	0	0	0	0	1
chr3	154777950	C	CTTTAGAA	RBM28	0.00169492	0	3	splice_acceptor_variant&intron_variant|RBM28|	0	1	0	0	0	0	1
chr4	841036	G	A	ERMARD	0.00169492	0	3	stop_gained|ERMARD|p.Gln588*	0	0	0	0	0	0	0
chr4	12050098	GGTAAA	G	AFG1L	0.00169492	0	3	splice_donor_variant&splice_region_variant&intron_variant|AFG1L|	0	0	0	0	0	0	0
chr4	20330751	G	A	FAM162B	0.00169492	0	3	stop_gained|FAM162B|p.Arg106*	0	0	0	0	0	0	0
chr4	36152717	C	CT	TAAR2	0.00169492	0	3	frameshift_variant|TAAR2|p.Ala246fs	0	0	0	0	0	0	0
chr4	36302061	CA	C	VNN2	0.00169492	0	3	frameshift_variant|VNN2|p.Leu242fs	0	0	0	0	0	0	0
chr4	39864763	A	AT	MTFR2	0.00169492	0	3	frameshift_variant|MTFR2|p.Asn177fs	0	0	0	0	0	0	0
chr4	40767336	TTCTG	T	IL22RA2	0.00169492	0	3	frameshift_variant|IL22RA2|p.Asp237fs	0	0	0	0	0	0	0
chr4	40769375	A	AT	IL22RA2	0.00169492	0	3	frameshift_variant|IL22RA2|p.Asn180fs	0	0	0	0	0	0	0
chr4	57756539	AG	A	CCDC170	0.00169492	0	3	frameshift_variant|CCDC170|p.Glu204fs	0	0	0	0	0	0	0
chr4	57756694	C	A	CCDC170	0.00169492	0	3	stop_gained|CCDC170|p.Tyr254*	0	0	0	0	0	0	0
chr4	63507163	T	C	ARID1B	0.00169492	0	3	splice_donor_variant&intron_variant|ARID1B|	0	0	0	0	0	1	1
chr4	73908207	AG	A	COQ3	0.00169492	0	3	frameshift_variant|COQ3|p.Asn39fs	0	0	0	0	0	0	0
chr4	99526115	T	C	DDX43	0.00169492	0	3	splice_acceptor_variant&intron_variant|DDX43|	0	0	0	0	0	0	0
chr4	102563859	CT	C	COL9A1	0.00169492	0	3	frameshift_variant|COL9A1|p.Gly394fs	1	0	0	0	0	0	1
chr4	130329339	G	GT	GLP1R	0.00169492	0	3	frameshift_variant|GLP1R|p.Pro86fs	0	0	1	0	0	0	1
chr4	136213949	CCT	C	RGL2	0.00169492	0	3	frameshift_variant|RGL2|p.Ser647fs	0	0	0	0	0	0	0
chr4	136327642	G	T	COL11A2	0.00169492	0	3	splice_donor_variant&intron_variant|COL11A2|	1	0	0	0	0	0	1
chr4	137460902	G	C	TNXB	0.00169492	0	3	splice_donor_variant&intron_variant|TNXB|	0	1	0	0	0	0	1
chr4	137473957	C	T	ENSMMUG00000049499	0.00169492	0	3	stop_gained|ENSMMUG00000049499|p.Trp1064*	0	0	0	0	0	0	0
chr4	137496498	C	CGCGGGCCG	ENSMMUG00000059791	0.00169492	0	3	frameshift_variant|ENSMMUG00000059791|p.Ala1553fs	0	0	0	0	0	0	0
chr4	137496501	T	TGCACC	ENSMMUG00000059791	0.00169492	0	3	frameshift_variant|ENSMMUG00000059791|p.Ser1552fs	0	0	0	0	0	0	0
chr4	137541392	G	GA	NELFE	0.00169492	0	3	frameshift_variant|NELFE|p.Asp221fs	1	0	0	0	0	0	1
chr4	137733957	TG	T	VWA7	0.00169492	0	3	frameshift_variant|VWA7|p.Gly389fs	0	0	0	0	0	0	0
chr4	138767395	CG	C	ENSMMUG00000015688	0.00169492	0	3	frameshift_variant|ENSMMUG00000015688|p.Leu203fs	0	0	0	0	0	0	0
chr4	139744057	GC	G	TRIM10	0.00169492	0	3	frameshift_variant|TRIM10|p.Ile453fs	0	0	0	0	0	0	0
chr4	143444411	C	T	BTN1A1	0.00169492	0	3	stop_gained|BTN1A1|p.Trp169*	0	0	0	0	0	0	0
chr4	166033439	C	T	FAM217A	0.00169492	0	3	stop_gained|FAM217A|p.Gln8*	0	0	0	0	0	0	0
chr4	166069878	CT	C	PRPF4B	0.00169492	0	3	splice_acceptor_variant&intron_variant|PRPF4B|	0	0	1	0	0	0	1
chr5	6369373	AT	A	MAN2B2	0.00169492	0	3	frameshift_variant|MAN2B2|p.Asn322fs	0	0	0	0	0	0	0
chr5	47903324	GT	G	SLC10A4	0.00169492	0	3	frameshift_variant|SLC10A4|p.Leu380fs	0	0	0	0	0	0	0
chr5	51210247	TATGAA	T	TMEM150C	0.00169492	0	3	frameshift_variant|TMEM150C|p.Met102fs	0	0	0	0	0	0	0
chr5	51210255	T	TTA	TMEM150C	0.00169492	0	3	frameshift_variant|TMEM150C|p.Met104fs	0	0	0	0	0	0	0
chr5	56982710	GTC	G	SHROOM3	0.00169492	0	3	frameshift_variant|SHROOM3|p.Asp257fs	0	0	0	1	0	0	1
chr5	57847969	AG	A	PPEF2	0.00169492	0	3	frameshift_variant|PPEF2|p.Gln613fs	0	0	0	0	0	0	0
chr5	58072219	A	ACCAATTAT	G3BP2	0.00169492	0	3	splice_donor_variant&intron_variant|G3BP2|	0	0	0	0	0	0	0
chr5	62948535	C	CATCATAG	GRSF1	0.00169492	0	3	frameshift_variant|GRSF1|p.Arg543fs	0	0	0	0	0	0	0
chr5	97195885	T	TC	EIF4E	0.00169492	0	3	frameshift_variant&splice_region_variant|EIF4E|p.Arg211fs	0	0	1	0	0	0	1
chr5	101042495	A	G	MANBA	0.00169492	0	3	splice_donor_variant&intron_variant|MANBA|	0	1	0	0	0	0	1
chr5	101524643	C	T	CENPE	0.00169492	0	3	splice_acceptor_variant&intron_variant|CENPE|	0	0	1	1	0	0	2
chr5	108341047	G	T	EGF	0.00169492	0	3	stop_gained|EGF|p.Glu880*	0	1	1	0	0	0	2
chr5	119496240	C	CTTAATCA	ANXA5	0.00169492	0	3	splice_acceptor_variant&intron_variant|ANXA5|	0	0	1	0	0	0	1
chr5	138357733	C	A	MGAT4D	0.00169492	0	3	stop_gained|MGAT4D|p.Glu178*	0	0	0	0	0	0	0
chr5	145266304	C	CAA	PRMT9	0.00169492	0	3	frameshift_variant|PRMT9|p.Gly326fs	0	0	0	0	0	0	0
chr5	145518508	A	AG	ARHGAP10	0.00169492	0	3	frameshift_variant|ARHGAP10|p.Gln362fs	0	0	0	0	0	0	0
chr5	155794499	T	TA	GASK1B	0.00169492	0	3	frameshift_variant|GASK1B|p.Lys241fs	0	0	0	0	0	0	0
chr5	165642538	G	A	DDX60	0.00169492	0	3	stop_gained|DDX60|p.Gln426*	0	0	0	0	0	0	0
chr5	171602686	C	A	CEP44	0.00169492	0	3	stop_gained|CEP44|p.Cys309*	0	0	0	0	0	0	0
chr5	173637418	C	CTAAAAAA	SPCS3	0.00169492	0	3	frameshift_variant|SPCS3|p.Leu41fs	0	0	0	0	0	0	0
chr5	182327443	C	A	HELT	0.00169492	0	3	stop_gained|HELT|p.Cys19*	0	0	0	1	0	0	1
chr6	152084	T	TA	PLEKHG4B	0.00169492	0	3	frameshift_variant&stop_gained|PLEKHG4B|p.Tyr1413fs	0	0	0	0	0	0	0
chr6	585396	G	C	CEP72	0.00169492	0	3	splice_acceptor_variant&intron_variant|CEP72|	0	0	0	0	0	0	0
chr6	35736750	G	A	UGT3A1	0.00169492	0	3	stop_gained|UGT3A1|p.Arg400*	0	0	1	0	0	0	1
chr6	54253388	C	CT	IL6ST	0.00169492	0	3	splice_acceptor_variant&intron_variant|IL6ST|	0	0	0	1	0	0	1
chr6	55238381	GC	G	SETD9	0.00169492	0	3	frameshift_variant|SETD9|p.Tyr265fs	0	0	0	0	0	0	0
chr6	78126958	T	C	ACOT12	0.00169492	0	3	splice_acceptor_variant&intron_variant|ACOT12|	0	0	0	0	0	0	0
chr6	94552812	TCTCC	T	ENSMMUG00000064015	0.00169492	1	1	frameshift_variant|ENSMMUG00000064015|p.Trp118fs	0	0	0	0	0	0	0
chr6	144752363	AG	A	STK32A	0.00169492	0	3	splice_acceptor_variant&intron_variant|STK32A|	0	0	1	0	0	0	1
chr6	145537605	G	T	SPINK5	0.00169492	0	3	splice_acceptor_variant&intron_variant|SPINK5|	0	1	0	1	0	0	2
chr7	678365	A	T	ENSMMUG00000057676	0.00169492	0	3	splice_donor_variant&intron_variant|ENSMMUG00000057676|	0	0	0	0	0	0	0
chr7	16704555	G	A	PLCB2	0.00169492	0	3	stop_gained|PLCB2|p.Gln750*	0	0	0	0	0	0	0
chr7	19889756	ATT	A	TUBGCP4	0.00169492	0	3	frameshift_variant|TUBGCP4|p.Leu523fs	0	0	0	0	0	0	0
chr7	21516259	G	A	DUOX2	0.00169492	0	3	stop_gained|DUOX2|p.Arg1432*	0	1	0	0	0	0	1
chr7	47384688	G	C	UACA	0.00169492	0	3	stop_gained|UACA|p.Ser700*	0	0	0	0	0	0	0
chr7	51353831	C	CTT	CYP11A1	0.00169492	0	3	splice_acceptor_variant&intron_variant|CYP11A1|	0	1	1	1	0	0	3
chr7	51780659	GC	G	CYP1A2	0.00169492	0	3	frameshift_variant|CYP1A2|p.Ile326fs	1	0	1	1	0	0	3
chr7	52824981	A	AGCTG	CSPG4	0.00169492	0	3	frameshift_variant|CSPG4|p.Asp201fs	1	0	0	0	0	0	1
chr7	56034330	AC	A	ENSMMUG00000050284	0.00169492	0	3	frameshift_variant|ENSMMUG00000050284|p.Leu93fs	0	0	0	0	0	0	0
chr7	57258342	AT	A	BCL2A1	0.00169492	0	3	frameshift_variant|BCL2A1|p.Glu132fs	0	0	0	0	0	0	0
chr7	58627422	G	A	IL16	0.00169492	0	3	stop_gained|IL16|p.Trp761*	0	0	0	0	0	0	0
chr7	68695537	TC	T	ARPIN	0.00169492	0	3	frameshift_variant&splice_region_variant|ARPIN|p.Gly32fs	0	0	0	0	0	0	0
chr7	69753307	C	T	FES	0.00169492	0	3	stop_gained|FES|p.Arg143*	0	0	1	1	0	0	2
chr7	85693101	GT	G	DHRS2	0.00169492	0	3	frameshift_variant|DHRS2|p.Val170fs	0	0	0	0	0	0	0
chr7	86396701	G	A	CIDEB	0.00169492	0	3	stop_gained|CIDEB|p.Arg36*	0	0	0	0	0	0	0
chr7	93539007	T	TA	DTD2	0.00169492	0	3	frameshift_variant|DTD2|p.Gly101fs	0	0	0	0	0	0	0
chr7	99355848	ACT	A	MIPOL1	0.00169492	0	3	frameshift_variant|MIPOL1|p.Leu32fs	0	0	0	0	0	0	0
chr7	135044443	A	AGT	DCAF4	0.00169492	1	1	frameshift_variant|DCAF4|p.Ala37fs	0	0	0	0	0	0	0
chr7	154239672	GA	G	ATXN3	0.00169492	0	3	frameshift_variant|ATXN3|p.Phe75fs	1	0	0	0	0	0	1
chr7	166428287	G	A	ASPG	0.00169492	0	3	stop_gained|ASPG|p.Trp521*	0	0	1	0	0	0	1
chr8	8732356	TTC	T	CTSB	0.00169492	0	3	frameshift_variant|CTSB|p.Ser254fs	0	0	1	0	0	0	1
chr8	20323367	TACTA	T	SLC18A1	0.00169492	0	3	frameshift_variant&splice_donor_variant&splice_region_variant&intron_variant|SLC18A1|p.Met183fs	0	0	1	0	0	0	1
chr8	28168572	G	A	SCARA5	0.00169492	0	3	stop_gained|SCARA5|p.Arg377*	0	0	0	0	0	0	0
chr8	31459363	C	T	WRN	0.00169492	0	3	stop_gained|WRN|p.Gln1257*	0	1	0	1	0	0	2
chr8	43325094	G	T	CHRNB3	0.00169492	0	3	stop_gained|CHRNB3|p.Gly59*	0	0	1	0	0	0	1
chr8	67261790	A	C	MYBL1	0.00169492	0	3	splice_donor_variant&intron_variant|MYBL1|	0	0	0	0	0	0	0
chr8	71271922	AG	A	XKR9	0.00169492	0	3	frameshift_variant|XKR9|p.Glu73fs	0	0	0	0	0	0	0
chr8	91770150	G	T	SLC26A7	0.00169492	0	3	splice_donor_variant&intron_variant|SLC26A7|	0	0	0	0	0	0	0
chr8	95103190	C	T	DPY19L4	0.00169492	0	3	stop_gained|DPY19L4|p.Arg765*	0	0	0	0	0	0	0
chr8	109647884	ACTTT	A	PKHD1L1	0.00169492	0	3	frameshift_variant|PKHD1L1|p.Leu2175fs	0	0	0	0	0	0	0
chr8	134865967	T	C	ZFAT	0.00169492	0	3	splice_acceptor_variant&intron_variant|ZFAT|	0	0	0	1	0	0	1
chr8	143010220	G	GT	THEM6	0.00169492	0	3	frameshift_variant|THEM6|p.Ser139fs	0	0	0	0	0	0	0
chr9	14474724	TCA	T	SEPHS1	0.00169492	0	3	frameshift_variant|SEPHS1|p.Met132fs	0	0	0	0	0	0	0
chr9	18089970	G	A	CUBN	0.00169492	0	3	stop_gained|CUBN|p.Gln1609*	0	1	1	1	0	0	3
chr9	21903878	A	G	NEBL	0.00169492	0	3	splice_donor_variant&intron_variant|NEBL|	0	0	0	0	0	0	0
chr9	30952235	G	A	JCAD	0.00169492	0	3	stop_gained|JCAD|p.Arg38*	0	0	0	0	0	0	0
chr9	41490025	G	A	BMS1	0.00169492	0	3	stop_gained|BMS1|p.Trp764*	0	0	0	0	0	0	0
chr9	45937634	A	G	ENSMMUG00000051740	0.00169492	0	3	splice_acceptor_variant&intron_variant|ENSMMUG00000051740|	0	0	0	0	0	0	0
chr9	46614983	C	A	ALOX5	0.00169492	0	3	stop_gained|ALOX5|p.Tyr182*	0	0	1	0	0	0	1
chr9	64197208	T	G	USP54	0.00169492	0	3	stop_gained|USP54|p.Leu765*	0	0	0	0	0	0	0
chr9	69625294	C	T	PBLD	0.00169492	0	3	stop_gained|PBLD|p.Arg282*	0	0	0	0	0	0	0
chr9	70090718	ACTTT	A	ENSMMUG00000061385	0.00169492	0	3	frameshift_variant|ENSMMUG00000061385|p.Lys62fs	0	0	0	0	0	0	0
chr9	91120042	C	T	RPP30	0.00169492	0	3	stop_gained|RPP30|p.Arg226*	0	0	0	0	0	0	0
chr9	97675303	T	G	ARHGAP19	0.00169492	0	3	splice_acceptor_variant&intron_variant|ARHGAP19|	0	0	0	0	0	0	0
chr9	100311668	C	CCTGT	ABCC2	0.00169492	0	3	frameshift_variant&stop_gained|ABCC2|p.Glu1165fs	0	1	1	0	0	0	2
chr9	124851617	C	CTCCAG	OAT	0.00169492	0	3	splice_acceptor_variant&intron_variant|OAT|	0	1	1	1	0	0	3
chr9	127795860	G	T	DOCK1	0.00169492	0	3	splice_donor_variant&intron_variant|DOCK1|	0	0	0	1	0	0	1
chr9	133733509	C	T	ADAM8	0.00169492	0	3	splice_acceptor_variant&intron_variant|ADAM8|	0	0	0	0	0	0	0
chr10	6226501	AG	A	UPK3A	0.00169492	0	3	frameshift_variant|UPK3A|p.Thr56fs	1	0	0	0	0	0	1
chr10	7856386	G	T	EFCAB6	0.00169492	0	3	splice_acceptor_variant&intron_variant|EFCAB6|	0	0	0	0	0	0	0
chr10	8974371	A	T	RRP7A	0.00169492	0	3	stop_gained|RRP7A|p.Lys204*	0	0	0	0	0	0	0
chr10	8974792	CAG	C	RRP7A	0.00169492	0	3	splice_acceptor_variant&intron_variant|RRP7A|	0	0	0	0	0	0	0
chr10	13447468	C	G	BAIAP2L2	0.00169492	0	3	stop_gained|BAIAP2L2|p.Tyr365*	0	0	0	0	0	0	0
chr10	13454725	CT	C	SLC16A8	0.00169492	0	3	frameshift_variant|SLC16A8|p.Leu179fs	0	0	1	0	0	0	1
chr10	20868985	TC	T	DUSP18	0.00169492	0	3	frameshift_variant|DUSP18|p.Pro175fs	0	0	0	0	0	0	0
chr10	26182155	ACT	A	PIWIL3	0.00169492	0	3	frameshift_variant&splice_region_variant|PIWIL3|p.Arg192fs	0	0	0	0	0	0	0
chr10	27230444	A	G	RGL4	0.00169492	0	3	splice_acceptor_variant&intron_variant|RGL4|	0	0	0	0	0	0	0
chr10	27233825	TCC	T	RGL4	0.00169492	0	3	frameshift_variant|RGL4|p.Pro387fs	0	0	0	0	0	0	0
chr10	30803214	CAG	C	ENSMMUG00000047015	0.00169492	0	3	frameshift_variant|ENSMMUG00000047015|p.Glu236fs	0	0	0	0	0	0	0
chr10	32928804	CTCT	C	SEPTIN5	0.00169492	0	3	frameshift_variant&splice_acceptor_variant&splice_region_variant&intron_variant|SEPTIN5|p.Glu153fs	0	0	0	0	0	0	0
chr10	33891747	GCAGAA	G	TUBA8	0.00169492	0	3	frameshift_variant|TUBA8|p.Phe29fs	0	1	1	0	0	0	2
chr10	43068711	C	T	CSTL1	0.00169492	0	3	stop_gained|CSTL1|p.Trp6*	0	0	0	0	0	0	0
chr10	63910366	C	G	TMC2	0.00169492	0	3	splice_acceptor_variant&intron_variant|TMC2|	0	0	0	0	0	0	0
chr10	64098033	C	T	TGM6	0.00169492	0	3	splice_acceptor_variant&intron_variant|TGM6|	0	0	0	0	0	0	0
chr10	73907506	G	A	ARHGAP40	0.00169492	0	3	stop_gained|ARHGAP40|p.Trp579*	0	0	0	0	0	0	0
chr10	81065844	AC	A	ZSWIM1	0.00169492	0	3	frameshift_variant|ZSWIM1|p.His367fs	0	0	0	0	0	0	0
chr11	6795423	C	CT	ACRBP	0.00169492	0	3	splice_acceptor_variant&intron_variant|ACRBP|	0	0	0	0	0	0	0
chr11	6983962	T	TG	CD4	0.00169492	0	3	frameshift_variant|CD4|p.Val405fs	1	0	1	0	0	0	2
chr11	10923666	G	T	A2ML1	0.00169492	0	3	stop_gained|A2ML1|p.Tyr265*	0	0	0	0	0	0	0
chr11	19770412	TC	T	PIK3C2G	0.00169492	0	3	frameshift_variant|PIK3C2G|p.Met598fs	0	0	1	0	0	0	1
chr11	30828943	T	TG	OVCH1	0.00169492	0	3	frameshift_variant|OVCH1|p.Thr297fs	0	0	0	0	0	0	0
chr11	42879079	G	A	ADAMTS20	0.00169492	0	3	stop_gained|ADAMTS20|p.Arg1158*	0	0	0	0	0	0	0
chr11	49744406	C	A	CERS5	0.00169492	0	3	splice_acceptor_variant&intron_variant|CERS5|	0	0	0	0	0	0	0
chr11	52340288	CT	C	KRT76	0.00169492	1	1	frameshift_variant|KRT76|p.Ser261fs	0	0	0	0	0	0	0
chr11	52997104	C	T	AMHR2	0.00169492	0	3	stop_gained|AMHR2|p.Gln210*	0	1	1	0	0	0	2
chr11	55495792	G	A	DGKA	0.00169492	0	3	stop_gained|DGKA|p.Trp325*	0	0	1	0	0	0	1
chr11	56007627	T	TC	TIMELESS	0.00169492	0	3	frameshift_variant|TIMELESS|p.Glu670fs	0	0	0	1	0	0	1
chr11	56484880	TC	T	ENSMMUG00000060449	0.00169492	0	3	frameshift_variant|ENSMMUG00000060449|p.Lys154fs	0	0	0	0	0	0	0
chr11	63834957	C	A	C11H12orf56	0.00169492	0	3	stop_gained&splice_region_variant|C11H12orf56|p.Gly439*	0	0	0	0	0	0	0
chr11	69393893	C	CA	MYRFL	0.00169492	0	3	frameshift_variant|MYRFL|p.Val113fs	0	0	0	0	0	0	0
chr11	74894329	G	A	CAPS2	0.00169492	0	3	stop_gained|CAPS2|p.Gln117*	0	0	0	0	0	0	0
chr11	79908602	AATGT	A	OTOGL	0.00169492	0	3	frameshift_variant|OTOGL|p.Val2065fs	0	0	0	0	0	0	0
chr11	93471001	G	GA	CRADD	0.00169492	0	3	frameshift_variant|CRADD|p.Glu92fs	0	0	0	1	0	0	1
chr11	94380160	G	A	TMCC3	0.00169492	0	3	stop_gained|TMCC3|p.Gln135*	0	0	0	0	0	0	0
chr11	104765995	CT	C	ALDH1L2	0.00169492	0	3	frameshift_variant|ALDH1L2|p.Lys754fs	0	0	0	0	0	0	0
chr11	106664547	ATTAAC	A	MTERF2	0.00169492	0	3	frameshift_variant|MTERF2|p.Lys131fs	0	0	0	0	0	0	0
chr11	109043447	C	T	MYO1H	0.00169492	0	3	stop_gained|MYO1H|p.Arg90*	0	0	0	0	0	0	0
chr11	110189785	G	C	RAD9B	0.00169492	0	3	splice_acceptor_variant&intron_variant|RAD9B|	0	0	0	1	0	0	1
chr11	120839210	G	A	OASL	0.00169492	0	3	stop_gained|OASL|p.Gln116*	0	0	0	0	0	0	0
chr11	121013098	G	A	P2RX7	0.00169492	0	3	splice_donor_variant&intron_variant|P2RX7|	0	0	0	0	0	0	0
chr11	123098715	CTTGT	C	MPHOSPH9	0.00169492	0	3	frameshift_variant|MPHOSPH9|p.Gln163fs	0	0	0	0	0	0	0
chr12	47093021	C	T	PLA2R1	0.00169492	0	3	splice_acceptor_variant&intron_variant|PLA2R1|	0	0	0	0	0	0	0
chr12	64650189	ACT	A	TTC30B	0.00169492	0	3	frameshift_variant|TTC30B|p.Ser183fs	0	0	0	0	0	0	0
chr12	89516242	G	T	KIAA2012	0.00169492	0	3	stop_gained|KIAA2012|p.Glu817*	0	0	0	0	0	0	0
chr12	95737549	C	T	PIKFYVE	0.00169492	0	3	stop_gained|PIKFYVE|p.Gln1059*	1	0	0	1	0	0	2
chr12	103891324	AAAGT	A	RPL37A	0.00169492	0	3	frameshift_variant&splice_donor_variant&splice_region_variant&intron_variant|RPL37A|p.Lys44fs	0	0	0	0	1	0	1
chr12	106670033	AG	A	ANKZF1	0.00169492	0	3	frameshift_variant|ANKZF1|p.Asp320fs	0	0	0	0	0	0	0
chr12	115461173	C	G	SPHKAP	0.00169492	0	3	splice_acceptor_variant&intron_variant|SPHKAP|	0	0	0	0	0	0	0
chr13	12475288	C	T	CCDC138	0.00169492	0	3	stop_gained|CCDC138|p.Gln179*	0	0	0	0	0	0	0
chr13	15464384	G	A	ZC3H8	0.00169492	0	3	stop_gained|ZC3H8|p.Gln127*	0	0	0	0	0	0	0
chr13	16101763	C	T	IL37	0.00169492	0	3	stop_gained|IL37|p.Gln65*	0	0	0	0	0	0	0
chr13	23783422	T	TCA	DNAH6	0.00169492	0	3	frameshift_variant|DNAH6|p.Ser2949fs	0	0	0	0	0	0	0
chr13	23783423	T	TA	DNAH6	0.00169492	0	3	frameshift_variant|DNAH6|p.Glu2948fs	0	0	0	0	0	0	0
chr13	29510224	TGA	T	REG1A	0.00169492	0	3	frameshift_variant|REG1A|p.Leu76fs	0	0	1	0	0	0	1
chr13	29510228	C	CTT	REG1A	0.00169492	0	3	frameshift_variant|REG1A|p.Leu76fs	0	0	1	0	0	0	1
chr13	29549848	G	A	REG1B	0.00169492	0	3	splice_donor_variant&intron_variant|REG1B|	0	0	0	0	0	0	0
chr13	34296681	C	T	DQX1	0.00169492	0	3	stop_gained|DQX1|p.Arg595*	0	0	0	0	0	0	0
chr13	37183960	G	C	DYSF	0.00169492	0	3	stop_gained|DYSF|p.Tyr1378*	0	1	0	0	0	0	1
chr13	37907722	C	T	CD207	0.00169492	0	3	stop_gained|CD207|p.Gln221*	0	0	0	0	0	0	0
chr13	37924372	G	GA	CLEC4F	0.00169492	0	3	frameshift_variant|CLEC4F|p.Asn291fs	0	0	0	0	0	0	0
chr13	65445845	C	G	THADA	0.00169492	0	3	stop_gained|THADA|p.Ser1426*	0	0	0	0	0	0	0
chr13	77694783	C	T	CAPN14	0.00169492	0	3	stop_gained|CAPN14|p.Gln82*	0	0	0	0	0	0	0
chr13	78128825	G	A	CAPN13	0.00169492	0	3	stop_gained|CAPN13|p.Trp347*	0	0	0	0	0	0	0
chr13	81443861	G	A	GCKR	0.00169492	0	3	stop_gained|GCKR|p.Arg358*	0	0	0	0	0	0	0
chr13	81839710	TC	T	ABHD1	0.00169492	0	3	frameshift_variant|ABHD1|p.Asp116fs	0	0	0	0	0	0	0
chr13	97604757	CTG	C	SLC66A3	0.00169492	0	3	frameshift_variant|SLC66A3|p.Gln134fs	0	0	0	0	0	0	0
chr14	6746862	C	G	NDUFS8	0.00169492	0	3	splice_acceptor_variant&intron_variant|NDUFS8|	0	1	1	0	0	0	2
chr14	7171711	C	A	POLD4	0.00169492	0	3	stop_gained|POLD4|p.Cys61*	0	0	0	0	0	0	0
chr14	7990446	C	A	ACTN3	0.00169492	0	3	stop_gained|ACTN3|p.Glu434*	0	0	0	0	0	0	0
chr14	8943444	C	A	EHBP1L1	0.00169492	0	3	stop_gained|EHBP1L1|p.Glu579*	0	0	0	0	0	0	0
chr14	12695164	G	GC	PPP1R32	0.00169492	0	3	frameshift_variant|PPP1R32|p.Arg116fs	0	0	0	0	0	0	0
chr14	12926981	T	C	ENSMMUG00000042208	0.00169492	0	3	splice_acceptor_variant&intron_variant|ENSMMUG00000042208|	0	0	0	0	0	0	0
chr14	14085129	GATCCCAC	G	OOSP4B	0.00169492	0	3	frameshift_variant|OOSP4B|p.Cys63fs	0	0	0	0	0	0	0
chr14	16179608	C	A	PRG3	0.00169492	0	3	stop_gained|PRG3|p.Cys110*	0	0	0	0	0	0	0
chr14	21951169	C	T	HSD17B12	0.00169492	0	3	splice_acceptor_variant&intron_variant|HSD17B12|	0	0	0	1	0	0	1
chr14	34105763	CA	C	ENSMMUG00000049710	0.00169492	0	3	frameshift_variant|ENSMMUG00000049710|p.Asn90fs	0	0	0	0	0	0	0
chr14	48023506	G	A	OTOG	0.00169492	0	3	stop_gained|OTOG|p.Gln2067*	0	0	0	0	0	0	0
chr14	48322123	CA	C	NUCB2	0.00169492	0	3	frameshift_variant&splice_region_variant|NUCB2|p.His253fs	0	0	1	0	0	0	1
chr14	56622985	CT	C	SCUBE2	0.00169492	0	3	frameshift_variant|SCUBE2|p.Leu327fs	0	0	0	0	0	0	0
chr14	59771302	C	T	OR52B2	0.00169492	0	3	stop_gained|OR52B2|p.Arg225*	0	0	0	0	0	0	0
chr14	67033119	CAG	C	UCP2	0.00169492	0	3	frameshift_variant|UCP2|p.Ser102fs	0	0	0	0	0	0	0
chr14	67511529	T	G	KCNE3	0.00169492	0	3	splice_acceptor_variant&intron_variant|KCNE3|	1	0	0	0	0	0	1
chr14	68788274	TCCGCCCC	T	MOGAT2	0.00169492	0	3	frameshift_variant|MOGAT2|p.Arg136fs	0	1	0	1	0	0	2
chr14	95184404	G	T	ANGPTL5	0.00169492	0	3	stop_gained|ANGPTL5|p.Tyr90*	0	0	0	0	0	0	0
chr14	99344474	AGGCTG	A	AASDHPPT	0.00169492	0	3	frameshift_variant&splice_acceptor_variant&splice_region_variant&intron_variant|AASDHPPT|p.Ala62fs	0	0	0	0	0	0	0
chr14	106837810	T	C	TMPRSS5	0.00169492	0	3	splice_acceptor_variant&intron_variant|TMPRSS5|	0	0	0	0	0	0	0
chr14	107795360	CT	C	NXPE2	0.00169492	0	3	frameshift_variant|NXPE2|p.Phe287fs	0	0	0	0	0	0	0
chr14	117773907	C	T	CCDC15	0.00169492	0	3	stop_gained|CCDC15|p.Arg735*	0	0	0	0	0	0	0
chr15	1008011	C	T	TPRN	0.00169492	0	3	stop_gained|TPRN|p.Gln398*	0	1	0	0	0	0	1
chr15	8949784	C	A	PRRC2B	0.00169492	0	3	splice_donor_variant&intron_variant|PRRC2B|	0	0	0	0	0	0	0
chr15	10095875	CAAGT	C	HMCN2	0.00169492	0	3	frameshift_variant|HMCN2|p.Asn4034fs	0	0	0	0	0	0	0
chr15	10119055	CG	C	HMCN2	0.00169492	0	3	frameshift_variant|HMCN2|p.Pro2894fs	0	0	0	0	0	0	0
chr15	12332541	TGGAG	T	GOLGA2	0.00169492	0	3	frameshift_variant|GOLGA2|p.Met579fs	0	0	0	0	0	0	0
chr15	12446945	GGCCCA	G	LCN2	0.00169492	0	3	frameshift_variant|LCN2|p.Leu218fs	0	0	1	0	0	0	1
[truncated: 2,168 more rows]

## Sheet: Supplementary Table 3
Supplementary Table 3. Enrichment results of the very common (MAF>0.05) pLoF genes.
Source	Term name	Term ID	Adjusted p value	Term size	Query size	Intersection size	Intersections
KEGG	Olfactory transduction	KEGG:04740	0.000180904	303	68	13	OR6Y1,ENSMMUG00000052449,OR4E2,OR4F6,OR8A1,OR1E2,OR9A4,OR6C4,OR2J3,OR4D11,OR8B4,OR2D2,OR5A1

## Sheet: Supplementary Table 4
Supplementary Table 4. Enrichment results of the rare (MAF<0.01) pLoF genes.
Source	Term name	Term ID	Adjusted p value	Term size	Query size	Intersection size	Intersections
KEGG	Motor proteins	KEGG:04814	0.00238139	182	959	43	KIF14,DNAH1,MYH15,DYNC1I1,KIF13A,DNAH5,MYO3A,MYH7B,MYO1A,DNAH10,MYO3B,MYO7A,KIF24,DNAH2,MYH4,DNAH9,MYO15A,MYO19,MYO1F,TNNT1,KIFC3,MYO1G,KIF20B,KIF5C,KIF18A,DYNC2H1,DCTN3,ENSMMUG00000013436,CENPE,TUBA8,MYO1H,DNAH6,KIF18B,KLC3,KIF9,MYO5A,DNAI2,TUBA4A,KIF2B,STARD9,KIF19,TUBE1,MYO7B
KEGG	Arachidonic acid metabolism	KEGG:00590	0.0153855	63	959	19	PLA2G4B,PLA2G4D,PLA2G4F,PTGR2,AKR1C8,CYP2C19,ENSMMUG00000020999,ALOX12,PLA2G4C,PLA2G3,LTA4H,PLB1,ENSMMUG00000012749,ALOX5,ALOX15,EPHX2,PRXL2B,CYP2U1,CYP2J2
KEGG	Serotonergic synapse	KEGG:04726	0.0238452	111	959	27	CACNA1S,HTR3E,GNAI2,PLA2G4B,PLA2G4D,PLA2G4F,CYP2C19,MAPK1,TPH2,HTR3B,ALOX12,PLA2G4C,HTR1B,CACNA1C,GNB3,PRKCA,HTR3C,PLCB2,SLC18A1,ALOX5,ALOX15,RAPGEF3,ITPR2,CYP2J2,KCNJ9,MAOB,GNB2
KEGG	Glycerophospholipid metabolism	KEGG:00564	0.0255148	96	959	24	DGKG,DGKI,PLA2G4B,PLA2G4D,PLA2G4F,PLD4,LPIN3,GPAT2,PLD2,LPIN2,PLA2G4C,LPCAT2,DGKK,PLD1,CDS1,PLA2G3,PLB1,PLA2G15,DGKA,PNPLA7,PLPP5,PLA1A,DGKQ,DGKD
KEGG	Metabolic pathways	KEGG:01100	0.0361301	1500	959	218	ALDH9A1,ADCY10,FMO2,FMO4,PRDX6,PFKFB2,ASH1L,NPR1,CHIA,GSTM2,TNNI3K,ALG6,HYI,SDHB,GALNT15,DGKG,NIT2,ENSMMUG00000057255,GART,CYP2W1,MOGAT3,HYAL4,DGKI,ATP6V0A4,NOS3,GSTA4,PLA2G7,ENPP4,PPT2,CYP21A2,UGT2A1,ENSMMUG00000014773,ADH4,AGXT2,BHMT2,P4HA2,HK3,PLA2G4B,PLA2G4D,PLA2G4F,GANC,HDC,COQ6,DGLUCY,CKB,PLD4,CA1,NAPRT,ENSMMUG00000000958,AKR1C8,PAPSS2,PLCE1,CYP2C19,CYP17A1,NAGA,ENSMMUG00000020999,UPB1,LPIN…
KEGG	Glycerolipid metabolism	KEGG:00561	0.0430426	63	959	17	ALDH9A1,DGKG,MOGAT3,DGKI,LPIN3,GPAT2,ALDH1B1,LPIN2,DGKK,PNLIPRP3,PNPLA3,AKR1A1,DGKA,MOGAT2,PLPP5,DGKQ,DGKD
KEGG	Choline metabolism in cancer	KEGG:05231	0.0430426	97	959	23	SLC44A3,DGKG,DGKI,EGF,PDGFC,PLA2G4B,PLA2G4D,PLA2G4F,MAPK1,RALGDS,PLD2,SLC44A2,PLA2G4C,DGKK,PLD1,PRKCA,MAP2K2,DGKA,WAS,PDGFB,DGKQ,DGKD,ENSMMUG00000054705

## Sheet: Supplementary Table 5
Supplementary Table 5. Anthropometric body measurement and the standards of how to measure.
Full Name	Measurement Standard
Head Length	Measurement from the middle of eyebrows ​to the furthest point on the back of head
Head Width	Measurement the widest distance about one inch above each ear
Head Circumference	Measure from the eyebrows and around the back at the biggest part of head
Torso Length	Measure from the base of neck (the most top cervical vertebra), down the curve of back, and end at the proximal base of tail
Sitting Height	Measurement from the highest point of the head to the base siting surface when sit up straight
Waist Circumference	Measurement around the level of umbilicus (belly button)
Hip Circumference	Measurement around the level of ischial callosity
Full-arm Length(left)	Measurement from the upper edge of the shoulder to the tip of middle finger
Full-leg Length(left)	Measurement from the upper edge of the iliac crest to the tip of middle toe.
Tail Length	Measurement from the proximal base of tail to the distal end of the last tail vertebra (excluding protruding hairs)
Body Length	Measurement from the highest point of the head to the proximal base of tail

## Sheet: Supplementary Table 6
Supplementary Table 6. Hematological and biochemical traits measured in this study.
Full Name	Abbreviations
Body Mass Index	BMI
Waist hip rate	WHR
Aspartate Aminotransferase	AST
Creatine Kinase	CK
Alanine Aminotransferase	ALT
Gamma-Glutamyl Transpeptidase	GGT
Alkaline Phosphatase	ALP
Total Bilirubin	TBIL
Total Protein	TP
Albumin	ALB
Globulin	GLO
Albumin to Globulin Ratio	A/G
Glucose	GLU
Total Cholesterol	TCHO
Triglyceride	TRIG
High-Density Lipoprotein	HDL
Low-Density Lipoprotein	LDL
Blood Urea Nitrogen	BUN
Creatinine	CRE
White Blood Cell Count	WBC
Neutrophile	Neu
Lymphocyte	Lym
Monocyte	Mon
Eosinophilic Granulocyte	Eos
Percentage of Neutrophils	Per_Neu
Percentage of Lymphocyte	Per_Lym
Percentage of Monocyte	Per_Mon
Percentage of Eosinophilic granulocyte	Per_Eos
Red Blood Cell Count	RBC
Hemoglobin	HGB
Haematocrit	HCT
Mean Corpuscular Volume	MCV
Mean Corpuscular Hemoglobin	MCH
Mean Corpuscular Hemoglobin Concentration	MCHC
Red Blood Cell Volume Distribution Width Coefficient of Variation	RDW-CV
Red Blood Cell Volume Distribution Width Standard Deviation	RDW-SD
Platelet Count	PLT
Mean Platelet Volume	MPV
Platelet Volume Distribution Width	PDW
Plateletcrit	PCT

## Sheet: Supplementary Table 7
Supplementary Table 7. Association of rare pLoF variants with the phenotypic traits (p-value<1×10−4).
Phenotypic trait	Chromosome	Position	Reference allele	Alternative allele	Variant type	Association p-value	Gene Symbol
Full-leg Length	chr2	99531286	C	CT	splice_acceptor_variant	8.97147e-06	ANO10
Body Weight	chr15	8935286	C	T	splice_acceptor_variant	9.66925e-06	PRRC2B
Lym	chr7	69202291	C	G	start_lost	1.08351e-05	ZNF774
ALT	chr14	57003122	G	GT	frameshift_variant	1.23367e-05	TRIM66
Tail Length	chr4	11338934	AT	A	frameshift_variant	1.59614e-05	FNDC1
HDL	chr17	17697910	A	ACT	frameshift_variant	2.08714e-05	STOML3
HDL	chr3	644408	C	CAGACG	frameshift_variant	2.79066e-05	FTCD
RDW_SD	chr7	41477989	A	G	splice_donor_variant	3.09746e-05	ANKDD1A
Full-arm Length	chr2	99531286	C	CT	splice_acceptor_variant	4.11863e-05	ANO10
Waist Circumference	chr2	105934945	C	CCT	frameshift_variant	4.93764e-05	UBA7
ALP	chr1	181763800	C	CAT	frameshift_variant	5.74531e-05	TMEM269
LDL	chr16	4465789	A	G	stop_gained	6.02106e-05	ALOX15
MCH	chr16	46621405	A	C	splice_donor_variant	6.36367e-05	SGCA
TBIL	chr6	93622223	A	G	stop_gained	7.03561e-05	ERAP1
Full-arm Length	chr18	49528838	A	G	stop_gained	7.52309e-05	CCDC178
HDL	chr16	4465789	A	G	stop_gained	7.88757e-05	ALOX15
ALP	chr5	57847969	A	AG	frameshift_variant	8.02463e-05	PPEF2
TRIG	chr16	3403757	T	C	stop_gained	9.23402e-05	SHPK
Head Length	chr2	44680104	C	G	stop_gained	9.25701e-05	ATR
Head Length	chr20	68189247	G	GGT	frameshift_variant	9.25701e-05	PKD1L2

## Sheet: Supplementary Table 8
Supplementary Table 8. GWAS results of the 30 independent loci that surpassed the genome-wide significance threshold (adjusted p-value=2.83×10−5). PVE represents the proportion of variance in the phenotype explained by a given SNP.
Chromosome	Position	Reference allele	Alternative allele	Variant type	Gene Symbol	Phenotypic trait	Index_beta	Index_se	Index_p	PVE （%）	Study Accession	Reference
chr2	195176108	C	T	intron_variant	ROBO2	ALP	1.10699	0.19194	8.05057e-09	4.55
chr4	126491691	C	T	intron_variant	BICRAL	ALP	-0.687026	0.123811	2.87351e-08	4.22
chr10	93895076	T	C	intergenic_region	NPEPL1-none	ALP	1.02148	0.1856	3.72016e-08	4.16
chr13	105052995	C	T	intron_variant	DCDC2C	ALP	1.06649	0.192171	2.8618e-08	4.22	GCST006016	Genetic analysis of quantitative traits in the Japanese population links cell types to complex human diseases.
chr8	125789207	G	A	downstream_gene_variant	TRIB1	ALT	-0.891419	0.153467	6.30145e-09	4.65	GCST90011898	Genome-wide association study of serum liver enzymes implicates diverse metabolic and liver pathology
chr19	13207806	T	C	intron_variant	ENSMMUG00000056233	ALT	-0.551236	0.0964842	1.10858e-08	4.5
chr6	80719770	C	T	downstream_gene_variant	EDIL3	BMI	-1.07365	0.195789	4.16516e-08	4.97	GCST90255621	Genomics and phenomics of body mass index reveals a complex disease network.
chr5	171233903	A	G	intergenic_region	HAND2-none	CHOL	0.365217	0.0659561	3.07206e-08	4.21
chr8	143539082	G	C	upstream_gene_variant	ZNF696	Eos	-0.532782	0.096603	3.48452e-08	3.39
chr10	28427768	C	T	intron_variant	GGT1	GGT	-0.55516	0.0997238	2.59192e-08	4.25	GCST007380	Biomarker and genomic risk factors for liver function test abnormality in hazardous drinkers
chr10	28504973	C	T	5_prime_UTR_variant	IGLL1	GGT	0.528919	0.0794311	2.76002e-11	5.97
chr3	143212415	A	T	intron_variant	ST7	Head Length	-0.741429	0.135611	4.56884e-08	4.94
chr3	158119742	A	G	intergenic_region	none-PLXNA4	Head Length	-1.41045	0.245762	9.51899e-09	5.42
chr16	4059616	T	C	3_prime_UTR_variant	UBE2G1	Head Length	-0.960899	0.171944	2.29099e-08	5.15
chr17	21316584	G	A	intergenic_region	TNFSF11-FAM216B	Head Width	-0.675899	0.123225	4.13329e-08	4.97
chr3	579267	G	GA	intron_variant	LSS	Full-leg Length	-1.19745	0.217116	3.48313e-08	5.09
chr5	31285438	G	A	intergenic_region	ENSMMUG00000063111-ENSMMUG00000055416	Full-leg Length	-0.460661	0.0827227	2.56585e-08	5.19
chr7	131534200	G	A	synonymous_variant	ERH	Full-leg Length	-0.630373	0.114035	3.24083e-08	5.11
chr2	134353857	T	G	intron_variant	CNTN4	Hip Circumference	-1.15499	0.210532	4.1099e-08	5.04
chr20	13164913	GC	G	intron_variant	SHISA9	Hip Circumference	-0.669311	0.121582	3.69112e-08	5.07	GCST008162	Whole-Genome Sequencing Coupled to Imputation Discovers Genetic Signals for Anthropometric Traits
chr15	96287434	A	G	intron_variant	ENSMMUG00000037955	Neu	0.689904	0.124976	3.38431e-08	3.4
chr11	129838296	C	T	intergenic_region	TMEM132D-none	PCT	0.569107	0.10274	3.03677e-08	3.41
chr14	9179447	G	T	upstream_gene_variant	ENSMMUG00000058391	PCT	1.14384	0.204782	2.32869e-08	3.47
chr7	159623299	C	T	intergenic_region	ENSMMUG00000064425-ENSMMUG00000047325	PDW	0.397776	0.0710894	2.20077e-08	3.48
chr8	69026307	A	G	intron_variant	C8H8orf34	PDW	-0.788873	0.140509	1.97268e-08	3.5
chr1	206962087	A	T	intergenic_region	ACTL8-ARHGEF10L	RDW-SD	-1.35529	0.246806	3.98905e-08	3.36
chr12	70820006	TA	T	intergenic_region	ENSMMUG00000052339-ENSMMUG00000061491	Waist Circumference	-0.902453	0.16483	4.37401e-08	5.01
chr15	106990683	A	T	downstream_gene_variant	Unknown	Waist Circumference	-1.28657	0.230378	2.34214e-08	5.21
chr1	140712384	C	T	intergenic_region	ENSMMUG00000057772-ENSMMUG00000055134	Body Weight	-0.6229	0.111467	2.29448e-08	5.15
chr20	65890799	T	C	intron_variant	WWOX	Body Weight	0.390931	0.0711187	3.86573e-08	4.99	GCST90277421	Interactions between genetic variants and environmental risk factors are associated with the severity of pelvic organ prolapse

## Sheet: Supplementary Table 9
Supplementary Table 9. Deleterious missense mutation identified by sift4g and polyphen2 methods
Chromosome	Position	Reference allele	Alternative allele	Annotation based on Mmul position	SIFT4G score	Annotation based on hg38 position	Alternative allele count	MAF
chr1	326406	C	G	missense_variant|OR2T27|p.Pro79Arg	0	chr1:248650649|missense_variant|79|P/R|MODERATE|OR2T27|deleterious(0)|probably_damaging(1);chr1:248650649|missense_variant|79|P/R|MODERATE|OR2T27|deleterious(0)|probably_damaging(1);	3	0.00169492
chr1	387224	A	G	missense_variant|OR2T10|p.Met118Val	0	chr1:248593417|missense_variant|118|M/V|MODERATE|OR2T10|deleterious(0)|probably_damaging(0.989);	43	0.0242938
chr1	387237	G	A	missense_variant|OR2T10|p.Arg122His	0	chr1:248593404|missense_variant|122|R/H|MODERATE|OR2T10|deleterious(0.03)|possibly_damaging(0.746);	102	0.0576271
chr1	387437	T	A	missense_variant|OR2T10|p.Cys189Ser	0.04	chr1:248593204|missense_variant|189|C/S|MODERATE|OR2T10|deleterious(0)|probably_damaging(1);	39	0.0220339
chr1	387714	T	C	missense_variant|OR2T10|p.Leu281Pro	0	chr1:248592927|missense_variant|281|L/P|MODERATE|OR2T10|deleterious(0)|probably_damaging(0.997);	51	0.0288136
chr1	529553	C	T	missense_variant|OR9G1|p.Ser126Phe	0.01	chr11:56700764|missense_variant|126|S/F|MODERATE|OR9G1|deleterious(0.01)|possibly_damaging(0.929);	29	0.0163842
chr1	529889	C	T	missense_variant|OR9G1|p.Ser238Phe	0	chr11:56701100|missense_variant|238|S/F|MODERATE|OR9G1|deleterious(0.03)|probably_damaging(1);	126	0.0711864
chr1	646206	C	T	missense_variant|OR2T1|p.Ser114Asn	0.04	chr1:248406335|missense_variant|63|S/N|MODERATE|OR2T1|deleterious(0.05)|possibly_damaging(0.864);	2	0.00112994
chr1	646231	G	C	missense_variant|OR2T1|p.His106Asp	0.01	chr1:248406310|missense_variant|55|H/D|MODERATE|OR2T1|deleterious(0)|probably_damaging(0.991);	848	0.479096
chr1	661370	A	T	missense_variant|OR2T6|p.Cys241Ser	0	chr1:248388329|missense_variant|241|C/S|MODERATE|OR2T6|deleterious(0)|probably_damaging(0.999);	49	0.0276836
chr1	769912	C	T	missense_variant|OR2M4|p.Arg131Trp	0.03	chr1:248239319|stop_gained|131|Q/*|HIGH|OR2M4|-|-;	10	0.00564972
chr1	770162	T	C	missense_variant|OR2M4|p.Ile214Thr	0	chr1:248239569|missense_variant|214|I/T|MODERATE|OR2M4|deleterious(0.01)|probably_damaging(0.996);	8	0.00451977
chr1	770220	T	G	missense_variant|OR2M4|p.Ser233Arg	0	chr1:248239627|missense_variant|233|S/R|MODERATE|OR2M4|deleterious(0)|possibly_damaging(0.953);	16	0.00903955
chr1	770345	C	T	missense_variant|OR2M4|p.Ser275Leu	0	chr1:248239752|missense_variant|275|S/L|MODERATE|OR2M4|deleterious(0)|probably_damaging(1);	4	0.00225989
chr1	1251702	C	T	missense_variant|OR1C1|p.Leu114Phe	0.02	chr1:247758067|missense_variant|114|L/F|MODERATE|OR1C1|deleterious(0)|probably_damaging(0.999);	157	0.0887006
chr1	1279193	G	A	missense_variant|OR14K1|p.Arg120Cys	0	chr1:247738972|missense_variant|120|R/C|MODERATE|OR14K1|deleterious(0.02)|possibly_damaging(0.486);	70	0.039548
chr1	1279543	T	C	missense_variant|OR14K1|p.Asn3Ser	0	chr1:247738622|missense_variant|3|N/S|MODERATE|OR14K1|deleterious(0)|probably_damaging(0.997);	54	0.0305085
chr1	1291164	A	G	missense_variant|OR14A2|p.Lys78Glu	0.03	chr1:247723812|missense_variant|78|K/E|MODERATE|OR14A2|deleterious(0.03)|probably_damaging(0.999);chr1:247723812|missense_variant|78|K/E|MODERATE|OR14A2|deleterious(0.03)|probably_damaging(0.999);	18	0.0101695
chr1	1291212	G	C	missense_variant|OR14A2|p.Gly94Arg	0.01	chr1:247723764|missense_variant|94|G/R|MODERATE|OR14A2|deleterious(0.02)|probably_damaging(1);chr1:247723764|missense_variant|94|G/R|MODERATE|OR14A2|deleterious(0.02)|probably_damaging(1);	47	0.0265537
chr1	1291294	A	G	missense_variant|OR14A2|p.Tyr121Cys	0	chr1:247723682|missense_variant|121|Y/C|MODERATE|OR14A2|deleterious(0.01)|probably_damaging(0.999);chr1:247723682|missense_variant|121|Y/C|MODERATE|OR14A2|deleterious(0.01)|probably_damaging(0.999);	83	0.0468927
chr1	1291438	C	G	missense_variant|OR14A2|p.Ser169Cys	0.03	chr1:247723538|missense_variant|169|S/C|MODERATE|OR14A2|deleterious(0)|possibly_damaging(0.677);chr1:247723538|missense_variant|169|S/C|MODERATE|OR14A2|deleterious(0)|possibly_damaging(0.677);	105	0.059322
chr1	1302968	G	A	missense_variant|OR6F1|p.Cys97Tyr	0	chr1:247712466|missense_variant|97|C/Y|MODERATE|OR6F1|deleterious(0)|probably_damaging(0.999);	17	0.00960452
chr1	1303136	T	C	missense_variant|OR6F1|p.Phe153Ser	0	chr1:247712298|missense_variant|153|F/S|MODERATE|OR6F1|deleterious(0.01)|probably_damaging(1);	225	0.127119
chr1	1334288	T	A	missense_variant|OR13G1|p.Ile24Asn	0	chr1:247672971|missense_variant|24|I/N|MODERATE|OR13G1|deleterious(0)|possibly_damaging(0.806);	96	0.0542373
chr1	1334384	T	C	missense_variant|OR13G1|p.Met56Thr	0	chr1:247672875|missense_variant|56|M/T|MODERATE|OR13G1|deleterious(0)|probably_damaging(0.981);	50	0.0282486
chr1	1334572	C	T	missense_variant|OR13G1|p.Arg119Cys	0	chr1:247672687|missense_variant|119|R/C|MODERATE|OR13G1|deleterious(0.01)|possibly_damaging(0.773);	60	0.0338983
chr1	1334630	G	A	missense_variant|OR13G1|p.Cys138Tyr	0.01	chr1:247672629|missense_variant|138|C/Y|MODERATE|OR13G1|deleterious(0.01)|probably_damaging(0.97);	37	0.020904
chr1	1334684	A	G	missense_variant|OR13G1|p.His156Arg	0.01	chr1:247672575|missense_variant|156|H/R|MODERATE|OR13G1|deleterious(0)|probably_damaging(0.958);	10	0.00564972
chr1	1560172	C	T	missense_variant|OR2B11|p.Thr80Ile	0.01	chr1:247451744|missense_variant|80|T/M|MODERATE|OR2B11|deleterious(0)|probably_damaging(0.997);	13	0.00734463
chr1	1560687	G	A	missense_variant|OR2B11|p.Val252Ile	0.01	chr1:247451229|missense_variant|252|V/I|MODERATE|OR2B11|deleterious(0)|probably_damaging(0.999);	16	0.00903955
chr1	1963448	G	T	missense_variant|ZNF670|p.Gly109Val	0	chr1:247038293|missense_variant|108|G/V|MODERATE|ZNF670|deleterious(0)|probably_damaging(0.999);chr1:247038293|missense_variant|109|G/V|MODERATE|ZNF670|deleterious(0)|probably_damaging(0.999);	31	0.0175141
chr1	2416967	G	C	missense_variant|CNST|p.Pro444Arg;missense_variant|CNST|p.Pro444Arg;missense_variant|CNST|p.Pro444Arg	0	chr1:246647532|missense_variant|444|P/R|MODERATE|CNST|deleterious(0.01)|probably_damaging(0.989);chr1:246647532|missense_variant|444|P/R|MODERATE|CNST|deleterious(0.01)|probably_damaging(0.98);chr1:246647532|missense_variant|444|P/R|MODERATE|CNST|deleterious(0.01)|probably_damaging(0.98);chr1:246647532|missense_variant|444|P/R|MODERATE|CNST|deleterious(0.01)|probably_damaging(0.98);chr1:246647532…	56	0.0316384
chr1	2473295	C	T	missense_variant|CNST|p.Asp105Asn;missense_variant|CNST|p.Asp105Asn;missense_variant|CNST|p.Asp105Asn;missense_variant|CNST|p.Asp105Asn	0	chr1:246591875|missense_variant|105|D/N|MODERATE|CNST|deleterious(0.01)|probably_damaging(0.999);chr1:246591875|missense_variant|105|D/N|MODERATE|CNST|deleterious(0.02)|probably_damaging(0.999);chr1:246591875|missense_variant|105|D/N|MODERATE|CNST|deleterious(0.02)|probably_damaging(0.999);chr1:246591875|missense_variant|105|D/N|MODERATE|CNST|deleterious(0.02)|probably_damaging(0.999);chr1:246591…	56	0.0316384
chr1	3386418	C	T	missense_variant|KIF26B|p.Arg2107Gln;missense_variant|KIF26B|p.Arg1907Gln	0	chr1:245702602|missense_variant|2108|R/Q|MODERATE|KIF26B|deleterious_low_confidence(0.05)|probably_damaging(1);	3	0.00169492
chr1	3938080	C	T	missense_variant|KIF26B|p.Ser52Asn	0	chr1:245156373|missense_variant|52|S/N|MODERATE|KIF26B|deleterious_low_confidence(0.02)|possibly_damaging(0.651);	312	0.176271
chr1	4257025	G	A	missense_variant|COX20|p.Ser53Phe;missense_variant|COX20|p.Ser41Phe	0	chr1:244842023|missense_variant|41|S/F|MODERATE|COX20|deleterious(0)|probably_damaging(0.989);chr1:244842023|missense_variant|53|S/F|MODERATE|COX20|deleterious(0)|probably_damaging(0.995);chr1:244842023|missense_variant|41|S/F|MODERATE|COX20|deleterious_low_confidence(0)|probably_damaging(0.989);chr1:244842023|missense_variant|41|S/F|MODERATE|COX20|deleterious(0)|probably_damaging(0.989);	3	0.00169492
chr1	7519993	A	G	missense_variant|KMO|p.Val164Ala;missense_variant|KMO|p.Val164Ala	0.02	chr1:241562208|missense_variant|164|V/A|MODERATE|KMO|deleterious(0.02)|possibly_damaging(0.931);chr1:241562208|missense_variant|164|V/A|MODERATE|KMO|deleterious(0.02)|probably_damaging(0.971);	30	0.0169492
chr1	13227122	A	T	missense_variant|LYST|p.Asp218Val;missense_variant|LYST|p.Asp218Val;missense_variant|LYST|p.Asp218Val;missense_variant|LYST|p.Asp218Val;missense_variant|LYST|p.Asp218Val;missense_variant|LYST|p.Asp218Val	0	chr1:235810168|missense_variant|217|D/V|MODERATE|LYST|deleterious_low_confidence(0.01)|probably_damaging(0.996);chr1:235810168|missense_variant|217|D/V|MODERATE|LYST|deleterious_low_confidence(0.01)|probably_damaging(0.996);	281	0.158757
chr1	13228303	A	T	missense_variant|LYST|p.Ile612Leu;missense_variant|LYST|p.Ile612Leu;missense_variant|LYST|p.Ile612Leu;missense_variant|LYST|p.Ile612Leu;missense_variant|LYST|p.Ile612Leu;missense_variant|LYST|p.Ile612Leu	0	chr1:235808987|missense_variant|611|I/L|MODERATE|LYST|deleterious(0.03)|possibly_damaging(0.5);chr1:235808987|missense_variant|611|I/L|MODERATE|LYST|deleterious(0.03)|possibly_damaging(0.5);	22	0.0124294
chr1	13231303	G	A	missense_variant|LYST|p.Glu948Lys;missense_variant|LYST|p.Glu948Lys;missense_variant|LYST|p.Glu948Lys;missense_variant|LYST|p.Glu948Lys;missense_variant|LYST|p.Glu948Lys;missense_variant|LYST|p.Glu948Lys	0	chr1:235806297|missense_variant|947|E/K|MODERATE|LYST|deleterious_low_confidence(0.02)|possibly_damaging(0.573);chr1:235806297|missense_variant|947|E/K|MODERATE|LYST|deleterious_low_confidence(0.02)|possibly_damaging(0.573);	39	0.0220339
chr1	13250332	C	A	missense_variant|LYST|p.Pro1604His;missense_variant|LYST|p.Pro1604His;missense_variant|LYST|p.Pro1604His;missense_variant|LYST|p.Pro1604His;missense_variant|LYST|p.Pro1604His;missense_variant|LYST|p.Pro1604His	0	chr1:235787254|missense_variant|1603|P/H|MODERATE|LYST|deleterious(0.01)|probably_damaging(0.972);chr1:235787254|missense_variant|1603|P/H|MODERATE|LYST|deleterious(0.01)|probably_damaging(0.972);	287	0.162147
chr1	13284186	C	G	missense_variant|LYST|p.Gln2543Glu;missense_variant|LYST|p.Gln2543Glu;missense_variant|LYST|p.Gln2485Glu;missense_variant|LYST|p.Gln2543Glu;missense_variant|LYST|p.Gln2543Glu;missense_variant|LYST|p.Gln2543Glu	0	chr1:235752008|missense_variant|2542|Q/E|MODERATE|LYST|deleterious(0.04)|possibly_damaging(0.677);chr1:235752008|missense_variant|2542|Q/E|MODERATE|LYST|deleterious(0.04)|possibly_damaging(0.677);	18	0.0101695
chr1	13329618	C	T	missense_variant|LYST|p.Arg3467Cys;missense_variant|LYST|p.Arg3413Cys;missense_variant|LYST|p.Arg3355Cys;missense_variant|LYST|p.Arg3350Cys;missense_variant|LYST|p.Arg3362Cys;missense_variant|LYST|p.Arg3383Cys	0	chr1:235702887|missense_variant|3412|R/C|MODERATE|LYST|deleterious(0)|probably_damaging(1);chr1:235702887|missense_variant|3412|R/C|MODERATE|LYST|deleterious(0)|probably_damaging(1);	4	0.00225989
chr1	14571942	A	T	missense_variant|TARBP1|p.Ile390Phe;missense_variant|TARBP1|p.Ile390Phe	0	chr1:234467582|missense_variant|390|I/F|MODERATE|TARBP1|deleterious(0.04)|possibly_damaging(0.855);	2	0.00112994
chr1	14575554	T	G	missense_variant|TARBP1|p.Leu446Val;missense_variant|TARBP1|p.Leu446Val	0	chr1:234463900|missense_variant|446|L/V|MODERATE|TARBP1|deleterious(0.04)|probably_damaging(0.999);	61	0.0344633
chr1	14642645	G	C	missense_variant&splice_region_variant|TARBP1|p.Glu1520Gln;missense_variant&splice_region_variant|TARBP1|p.Glu1520Gln	0	chr1:234393364|missense_variant,splice_region_variant|1520|E/Q|MODERATE|TARBP1|deleterious(0)|probably_damaging(0.988);	549	0.310169
chr1	14662402	C	T	missense_variant|COA6|p.Arg59Gln	0	chr1:234373642|missense_variant|59|R/Q|MODERATE|COA6|deleterious_low_confidence(0.02)|possibly_damaging(0.9);	53	0.0299435
chr1	14662418	T	G	missense_variant|COA6|p.Thr54Pro	0	chr1:234373626|missense_variant|54|T/P|MODERATE|COA6|deleterious_low_confidence(0)|probably_damaging(0.993);	5	0.00282486
chr1	14662552	C	T	missense_variant|COA6|p.Ser9Asn	0	chr1:234373492|missense_variant|9|S/N|MODERATE|COA6|deleterious_low_confidence(0)|possibly_damaging(0.462);	12	0.00677966
chr1	15808129	A	G	missense_variant|PCNX2|p.Tyr933Cys;missense_variant|PCNX2|p.Tyr933Cys;missense_variant|PCNX2|p.Tyr933Cys	0.03	chr1:233208583|missense_variant|933|Y/C|MODERATE|PCNX2|deleterious(0.03)|possibly_damaging(0.943);	140	0.079096
chr1	15838700	G	A	missense_variant|PCNX2|p.Ala1043Thr;missense_variant|PCNX2|p.Ala1043Thr	0.03	chr1:233179115|missense_variant|1043|A/T|MODERATE|PCNX2|deleterious(0.02)|probably_damaging(0.963);	5	0.00282486
chr1	17202714	G	A	missense_variant|DISC1|p.Arg517Trp;missense_variant|DISC1|p.Arg503Trp	0.01	chr1:231770985|stop_gained|517|Q/*|HIGH|DISC1|-|-;chr1:231770985|stop_gained|517|Q/*|HIGH|DISC1|-|-;chr1:231770985|stop_gained|549|Q/*|HIGH|DISC1|-|-;chr1:231770985|stop_gained|517|Q/*|HIGH|DISC1|-|-;chr1:231770985|stop_gained|517|Q/*|HIGH|DISC1|-|-;chr1:231770985|stop_gained|517|Q/*|HIGH|DISC1|-|-;chr1:231770985|stop_gained|517|Q/*|HIGH|DISC1|-|-;chr1:231770985|stop_gained|517|Q/*|HIGH|DISC1|-|-…	168	0.0949153
chr1	17649516	C	T	missense_variant|EXOC8|p.Arg148Cys	0.03	chr1:231337304|missense_variant|148|R/C|MODERATE|EXOC8|deleterious(0.05)|probably_damaging(0.988);	9	0.00508475
chr1	18196736	G	A	missense_variant|CAPN9|p.Arg602Trp	0.02	chr1:230792862|missense_variant|539|R/W|MODERATE|CAPN9|deleterious(0)|probably_damaging(0.994);chr1:230792862|missense_variant|602|R/W|MODERATE|CAPN9|deleterious(0)|probably_damaging(0.986);chr1:230792862|missense_variant|576|R/W|MODERATE|CAPN9|deleterious(0)|probably_damaging(0.992);	82	0.0463277
chr1	19365457	A	C	missense_variant|URB2|p.Leu1162Arg;missense_variant|URB2|p.Leu1162Arg;missense_variant|URB2|p.Leu1121Arg;missense_variant|URB2|p.Leu1162Arg	0	chr1:229638098|missense_variant|1162|L/R|MODERATE|URB2|deleterious(0.03)|possibly_damaging(0.583);chr1:229638098|missense_variant|1162|L/R|MODERATE|URB2|deleterious(0.03)|possibly_damaging(0.583);	32	0.0180791
chr1	19367108	T	A	missense_variant|URB2|p.Thr612Ser;missense_variant|URB2|p.Thr612Ser;missense_variant|URB2|p.Thr571Ser;missense_variant|URB2|p.Thr612Ser	0	chr1:229636447|missense_variant|612|T/S|MODERATE|URB2|deleterious(0.02)|probably_damaging(0.963);chr1:229636447|missense_variant|612|T/S|MODERATE|URB2|deleterious(0.02)|probably_damaging(0.963);	1721	0.972316
chr1	19368268	A	G	missense_variant|URB2|p.Leu225Pro;missense_variant|URB2|p.Leu225Pro;missense_variant|URB2|p.Leu225Pro;missense_variant|URB2|p.Leu225Pro	0.02	chr1:229635287|missense_variant|225|L/P|MODERATE|URB2|deleterious(0.01)|probably_damaging(0.966);chr1:229635287|missense_variant|225|L/P|MODERATE|URB2|deleterious(0.01)|probably_damaging(0.966);	267	0.150847
chr1	19474166	C	T	missense_variant|ABCB10|p.Arg559Cys;missense_variant|ABCB10|p.Arg527Cys;missense_variant|ABCB10|p.Arg492Cys	0.03	chr1:229527279|missense_variant|559|R/C|MODERATE|ABCB10|deleterious(0.01)|probably_damaging(1);	15	0.00847458
chr1	24487710	C	T	missense_variant|STYXL2|p.Ser327Phe;missense_variant|STYXL2|p.Ser327Phe	0	chr1:167126111|missense_variant|327|S/F|MODERATE|STYXL2|deleterious(0.01)|probably_damaging(0.999);	40	0.0225989
chr1	24488868	C	A	missense_variant|STYXL2|p.Pro713His;missense_variant|STYXL2|p.Pro713His	0	chr1:167127254|missense_variant|708|P/H|MODERATE|STYXL2|deleterious(0)|probably_damaging(0.999);	54	0.0305085
chr1	25587445	G	A	missense_variant|SFT2D2|p.Ala166Thr;missense_variant|SFT2D2|p.Ala150Thr;missense_variant|SFT2D2|p.Ala165Thr;missense_variant|SFT2D2|p.Ala154Thr	0	chr1:168242505|missense_variant|150|A/T|MODERATE|SFT2D2|deleterious(0)|possibly_damaging(0.925);	100	0.0564972
chr1	26066161	G	A	missense_variant|DPT|p.Thr105Met	0.02	chr1:168714338|missense_variant|105|T/M|MODERATE|DPT|deleterious(0)|possibly_damaging(0.834);	10	0.00564972
chr1	26855827	T	C	missense_variant|F5|p.Asn1692Ser	0.03	chr1:169530790|missense_variant|1735|N/S|MODERATE|F5|deleterious(0.03)|possibly_damaging(0.654);	36	0.020339
chr1	26866978	C	A	missense_variant|F5|p.Asp1117Tyr	0.03	chr1:169541690|missense_variant|1134|D/Y|MODERATE|F5|deleterious_low_confidence(0.03)|probably_damaging(1);	67	0.0378531
chr1	26915126	A	G	missense_variant|SELP|p.Ser830Pro	0	chr1:169590153|missense_variant|830|P/S|MODERATE|SELP|deleterious_low_confidence(0)|probably_damaging(1);chr1:169590153|missense_variant|830|P/S|MODERATE|SELP|deleterious_low_confidence(0)|probably_damaging(1);chr1:169590153|missense_variant|830|P/S|MODERATE|SELP|deleterious_low_confidence(0)|probably_damaging(1);chr1:169590153|missense_variant|768|P/S|MODERATE|SELP|deleterious_low_confidence(0)|…	164	0.0926554
chr1	27465863	A	G	missense_variant|NTMT2|p.Tyr42Cys	0	chr1:170146232|missense_variant|42|Y/C|MODERATE|NTMT2|deleterious_low_confidence(0)|probably_damaging(0.999);	68	0.0384181
chr1	28305154	A	G	missense_variant|MROH9|p.Glu480Gly	0	chr1:170996605|missense_variant|479|E/G|MODERATE|MROH9|deleterious(0.01)|possibly_damaging(0.628);chr1:170996605|missense_variant|479|E/G|MODERATE|MROH9|deleterious(0.02)|possibly_damaging(0.628);	54	0.0305085
chr1	32369938	G	A	missense_variant|TNN|p.Val688Met	0.01	chr1:175098538|missense_variant|688|V/M|MODERATE|TNN|deleterious(0)|probably_damaging(1);	56	0.0316384
chr1	32389128	T	A	missense_variant|TNN|p.Val1014Asp	0.02	chr1:175127081|missense_variant|1014|V/D|MODERATE|TNN|deleterious(0.02)|possibly_damaging(0.464);	92	0.0519774
chr1	32646733	G	A	missense_variant|TNR|p.Thr353Met;missense_variant|TNR|p.Thr353Met	0.01	chr1:175396726|missense_variant|353|T/M|MODERATE|TNR|deleterious(0)|probably_damaging(1);	36	0.020339
chr1	34005944	G	A	missense_variant|PAPPA2|p.Asp1467Asn	0	chr1:176769685|missense_variant|1468|D/N|MODERATE|PAPPA2|deleterious(0.04)|probably_damaging(0.976);chr1:176769685|missense_variant|1468|D/N|MODERATE|PAPPA2|deleterious(0.04)|probably_damaging(0.976);chr1:176769685|missense_variant|1468|D/N|MODERATE|PAPPA2|deleterious(0.04)|probably_damaging(0.976);chr1:176769685|missense_variant|1468|D/N|MODERATE|PAPPA2|deleterious(0.04)|probably_damaging(0.976)…	31	0.0175141
chr1	35167340	C	G	missense_variant|SEC16B|p.Gly911Ala;missense_variant|SEC16B|p.Gly899Ala	0	chr1:177933305|missense_variant|911|G/A|MODERATE|CRYZL2P-SEC16B|deleterious(0.02)|possibly_damaging(0.474);chr1:177933305|missense_variant|911|G/A|MODERATE|CRYZL2P-SEC16B|deleterious(0.02)|possibly_damaging(0.474);chr1:177933305|missense_variant|911|G/A|MODERATE|SEC16B|deleterious(0.02)|possibly_damaging(0.911);chr1:177933305|missense_variant|912|G/A|MODERATE|SEC16B|deleterious(0.02)|possibly_dam…	329	0.185876
chr1	37052181	C	T	missense_variant|TOR1AIP2|p.Gly373Ser;missense_variant|TOR1AIP2|p.Gly373Ser;missense_variant|TOR1AIP2|p.Gly373Ser;missense_variant|TOR1AIP2|p.Gly373Ser	0	chr1:179846367|missense_variant|373|G/S|MODERATE|TOR1AIP2|deleterious(0.03)|probably_damaging(1);chr1:179846367|missense_variant|373|G/S|MODERATE|TOR1AIP2|deleterious(0.03)|probably_damaging(1);chr1:179846367|missense_variant|373|G/S|MODERATE|TOR1AIP2|deleterious(0.03)|probably_damaging(1);chr1:179846367|missense_variant|373|G/S|MODERATE|TOR1AIP2|deleterious(0.03)|probably_damaging(1);chr1:179846…	47	0.0265537
chr1	37090917	C	A	missense_variant|TOR1AIP1|p.Thr182Asn;missense_variant|TOR1AIP1|p.Thr47Asn;missense_variant|TOR1AIP1|p.Thr47Asn;missense_variant|TOR1AIP1|p.Thr47Asn	0.03	chr1:179882642|missense_variant|47|T/N|MODERATE|TOR1AIP1|deleterious_low_confidence(0)|possibly_damaging(0.899);chr1:179882642|missense_variant|47|T/N|MODERATE|TOR1AIP1|deleterious_low_confidence(0)|possibly_damaging(0.933);	22	0.0124294
chr1	37126290	G	A	missense_variant|TOR1AIP1|p.Met719Ile;missense_variant|TOR1AIP1|p.Met535Ile;missense_variant|TOR1AIP1|p.Met513Ile;missense_variant|TOR1AIP1|p.Met554Ile	0	chr1:179918143|missense_variant|553|M/I|MODERATE|TOR1AIP1|deleterious(0.02)|probably_damaging(0.999);chr1:179918143|missense_variant|552|M/I|MODERATE|TOR1AIP1|deleterious(0.02)|possibly_damaging(0.711);	4	0.00225989
chr1	37218808	A	T	missense_variant|CEP350|p.Lys463Ile;missense_variant|CEP350|p.Lys442Ile;missense_variant|CEP350|p.Lys463Ile;missense_variant|CEP350|p.Lys463Ile;missense_variant|CEP350|p.Lys463Ile	0	chr1:180012070|missense_variant|463|K/I|MODERATE|CEP350|deleterious(0.01)|possibly_damaging(0.883);chr1:180012070|missense_variant|463|K/I|MODERATE|CEP350|deleterious(0.01)|possibly_damaging(0.883);chr1:180012070|missense_variant|462|K/I|MODERATE|CEP350|deleterious(0.01)|possibly_damaging(0.869);	39	0.0220339
chr1	38140750	G	C	missense_variant&splice_region_variant|KIAA1614|p.Asp403His	0	chr1:180935116|missense_variant,splice_region_variant|403|D/H|MODERATE|KIAA1614|deleterious(0.02)|probably_damaging(0.997);	29	0.0163842
chr1	38141384	G	A	missense_variant|KIAA1614|p.Ser614Asn	0	chr1:180935750|missense_variant|614|S/N|MODERATE|KIAA1614|deleterious(0.01)|probably_damaging(1);	253	0.142938
chr1	38146854	G	C	missense_variant|KIAA1614|p.Gly1016Ala	0	chr1:180941167|missense_variant|1014|G/A|MODERATE|KIAA1614|deleterious(0.01)|possibly_damaging(0.908);	217	0.122599
chr1	38146866	G	A	missense_variant|KIAA1614|p.Arg1020Gln	0	chr1:180941179|missense_variant|1018|R/Q|MODERATE|KIAA1614|deleterious(0.04)|probably_damaging(0.975);	74	0.0418079
chr1	38951971	C	T	missense_variant|CACNA1E|p.Arg1021Trp;missense_variant|CACNA1E|p.Arg1002Trp;missense_variant|CACNA1E|p.Arg876Trp	0	chr1:181732721|missense_variant|879|R/W|MODERATE|CACNA1E|deleterious(0)|probably_damaging(0.987);chr1:181732721|missense_variant|879|R/W|MODERATE|CACNA1E|deleterious(0)|probably_damaging(0.978);chr1:181732721|missense_variant|860|R/W|MODERATE|CACNA1E|deleterious_low_confidence(0.01)|probably_damaging(0.987);	2	0.00112994
chr1	39838193	G	C	missense_variant|RNASEL|p.Ser406Cys	0	chr1:182585590|missense_variant|406|S/C|MODERATE|RNASEL|deleterious(0.01)|probably_damaging(0.999);chr1:182585590|missense_variant|406|S/C|MODERATE|RNASEL|deleterious(0.01)|probably_damaging(0.999);	231	0.130508
chr1	40454705	G	A	missense_variant|LAMC2|p.Gly156Ser;missense_variant|LAMC2|p.Gly115Ser;missense_variant|LAMC2|p.Gly115Ser	0	chr1:183207943|missense_variant|48|G/S|MODERATE|LAMC2|deleterious(0.01)|probably_damaging(1);chr1:183207943|missense_variant|48|G/S|MODERATE|LAMC2|deleterious(0.01)|probably_damaging(0.999);	69	0.0389831
chr1	40462617	A	T	missense_variant|LAMC2|p.Asn206Ile;missense_variant|LAMC2|p.Asn165Ile;missense_variant|LAMC2|p.Asn165Ile;missense_variant|LAMC2|p.Asn35Ile	0.01	chr1:183215477|missense_variant|98|N/I|MODERATE|LAMC2|deleterious(0)|possibly_damaging(0.922);chr1:183215477|missense_variant|98|N/I|MODERATE|LAMC2|deleterious(0)|possibly_damaging(0.898);	236	0.133333
chr1	42080257	G	A	missense_variant|NIBAN1|p.Ala366Val;missense_variant|NIBAN1|p.Ala335Val;missense_variant|NIBAN1|p.Ala341Val;missense_variant|NIBAN1|p.Ala335Val	0	chr1:184818807|missense_variant|335|A/V|MODERATE|NIBAN1|deleterious(0.04)|probably_damaging(0.998);	97	0.0548023
chr1	43161201	C	G	missense_variant|HMCN1|p.Ala501Gly	0	chr1:185928617|missense_variant|501|A/G|MODERATE|HMCN1|deleterious(0.01)|probably_damaging(0.998);chr1:185928617|missense_variant|501|A/G|MODERATE|HMCN1|-|probably_damaging(1);	95	0.0536723
chr1	43185262	G	C	missense_variant|HMCN1|p.Gly716Ala	0	chr1:185965850|missense_variant|716|G/A|MODERATE|HMCN1|deleterious(0)|probably_damaging(0.999);chr1:185965850|missense_variant|716|G/A|MODERATE|HMCN1|-|probably_damaging(0.971);	43	0.0242938
chr1	43198273	C	A	missense_variant|HMCN1|p.Pro833Gln	0	chr1:185977913|missense_variant|833|P/Q|MODERATE|HMCN1|deleterious(0.01)|probably_damaging(1);chr1:185977913|missense_variant|833|P/Q|MODERATE|HMCN1|-|probably_damaging(0.973);	78	0.0440678
chr1	43227245	C	T	missense_variant&splice_region_variant|HMCN1|p.Pro1493Ser	0	chr1:186007129|missense_variant,splice_region_variant|1493|P/S|MODERATE|HMCN1|deleterious(0.04)|probably_damaging(0.999);chr1:186007129|missense_variant,splice_region_variant|1493|P/S|MODERATE|HMCN1|-|probably_damaging(1);	78	0.0440678
chr1	43272567	A	G	missense_variant|HMCN1|p.Ser2072Gly	0.01	chr1:186041046|missense_variant|2072|S/G|MODERATE|HMCN1|deleterious(0.03)|probably_damaging(0.995);chr1:186041046|missense_variant|2072|S/G|MODERATE|HMCN1|-|probably_damaging(0.999);	88	0.0497175
chr1	43319717	A	G	missense_variant|HMCN1|p.Asn3001Ser	0.02	chr1:186086363|missense_variant|3001|N/S|MODERATE|HMCN1|deleterious(0.01)|probably_damaging(0.997);chr1:186086363|missense_variant|3001|N/S|MODERATE|HMCN1|-|possibly_damaging(0.708);	72	0.040678
chr1	43350180	A	C	missense_variant|HMCN1|p.Lys3932Gln	0.01	chr1:186117569|missense_variant|3932|K/Q|MODERATE|HMCN1|deleterious(0)|probably_damaging(0.999);chr1:186117569|missense_variant|3932|K/Q|MODERATE|HMCN1|-|probably_damaging(0.999);	168	0.0949153
chr1	43381529	C	T	missense_variant|HMCN1|p.Thr4795Ile	0.01	chr1:186145520|missense_variant|4795|A/V|MODERATE|HMCN1|deleterious(0.04)|probably_damaging(1);chr1:186145520|missense_variant|4795|A/V|MODERATE|HMCN1|-|possibly_damaging(0.934);	68	0.0384181
chr1	43530206	C	A	missense_variant|PRG4|p.Ser821Tyr;missense_variant|PRG4|p.Ser728Tyr;missense_variant|PRG4|p.Ser780Tyr;missense_variant|PRG4|p.Ser778Tyr	0.02	chr1:186308361|missense_variant|840|S/Y|MODERATE|PRG4|deleterious(0)|possibly_damaging(0.876);chr1:186308361|missense_variant|788|S/Y|MODERATE|PRG4|deleterious(0)|possibly_damaging(0.876);chr1:186308361|missense_variant|747|S/Y|MODERATE|PRG4|deleterious(0)|possibly_damaging(0.876);chr1:186308361|missense_variant|838|S/Y|MODERATE|PRG4|deleterious(0)|possibly_damaging(0.876);chr1:186308361|missense…	29	0.0163842
chr1	43558914	G	A	missense_variant|TPR|p.Thr1558Met;missense_variant|TPR|p.Thr1482Met	0.01	chr1:186337074|missense_variant|1482|T/M|MODERATE|TPR|deleterious(0.01)|probably_damaging(0.968);	70	0.039548
chr1	43627793	C	A	missense_variant|ODR4|p.Pro349Thr	0	chr1:186406127|missense_variant|326|P/T|MODERATE|ODR4|deleterious(0.01)|probably_damaging(0.989);chr1:186406127|missense_variant|317|P/T|MODERATE|ODR4|deleterious(0.01)|probably_damaging(0.971);chr1:186406127|missense_variant|349|P/T|MODERATE|ODR4|deleterious(0.01)|probably_damaging(0.989);chr1:186406127|missense_variant|349|P/T|MODERATE|ODR4|deleterious(0.01)|probably_damaging(0.989);chr1:186406…	16	0.00903955
chr1	50379074	A	T	missense_variant|RO60|p.Leu314Phe;missense_variant|RO60|p.Leu314Phe;missense_variant|RO60|p.Leu314Phe;missense_variant|RO60|p.Leu314Phe	0	chr1:193076641|missense_variant|314|L/F|MODERATE|RO60|deleterious(0)|probably_damaging(1);chr1:193076641|missense_variant|314|L/F|MODERATE|RO60|deleterious(0)|probably_damaging(1);chr1:193076641|missense_variant|314|L/F|MODERATE|RO60|deleterious(0)|probably_damaging(1);chr1:193076641|missense_variant|314|L/F|MODERATE|RO60|deleterious(0)|probably_damaging(1);chr1:193076641|missense_variant|39|L/F|…	160	0.0903955
chr1	50414669	C	A	missense_variant|GLRX2|p.Gly22Cys	0	chr1:193105319|missense_variant|22|G/C|MODERATE|GLRX2|deleterious_low_confidence(0.04)|probably_damaging(0.977);	18	0.0101695
chr1	54477488	T	C	missense_variant&splice_region_variant|ASPM|p.Asp3387Gly;missense_variant&splice_region_variant|ASPM|p.Asp3106Gly	0.02	chr1:197086971|missense_variant,splice_region_variant|1803|D/G|MODERATE|ASPM|deleterious_low_confidence(0.01)|possibly_damaging(0.78);chr1:197086971|missense_variant,splice_region_variant|3388|D/G|MODERATE|ASPM|deleterious(0.01)|probably_damaging(0.965);	4	0.00225989
chr1	54494022	C	T	missense_variant|ASPM|p.Arg2078Gln;missense_variant|ASPM|p.Arg1797Gln	0	chr1:197103018|missense_variant|2078|R/Q|MODERATE|ASPM|deleterious(0.02)|probably_damaging(1);	138	0.0779661
chr1	54494598	C	T	missense_variant|ASPM|p.Arg1886His;missense_variant|ASPM|p.Arg1605His	0	chr1:197103594|missense_variant|1886|R/H|MODERATE|ASPM|deleterious(0.03)|probably_damaging(1);	434	0.245198
chr1	54536973	C	A	missense_variant|ASPM|p.Arg46Met	0.01	chr1:197146301|missense_variant|46|R/M|MODERATE|ASPM|deleterious(0)|probably_damaging(0.992);chr1:197146301|missense_variant|46|R/M|MODERATE|ASPM|deleterious(0)|probably_damaging(0.992);	16	0.00903955
chr1	58429338	G	A	missense_variant|KIF21B|p.Arg504Cys;missense_variant|KIF21B|p.Arg504Cys;missense_variant|KIF21B|p.Arg408Cys	0.02	chr1:201000565|missense_variant|504|R/C|MODERATE|KIF21B|deleterious(0)|probably_damaging(1);chr1:201000565|missense_variant|504|R/C|MODERATE|KIF21B|deleterious(0)|probably_damaging(1);chr1:201000565|missense_variant|504|R/C|MODERATE|KIF21B|deleterious(0)|probably_damaging(1);chr1:201000565|missense_variant|504|R/C|MODERATE|KIF21B|deleterious(0)|probably_damaging(1);	8	0.00451977
chr1	58645128	C	T	missense_variant|IGFN1|p.Thr615Met	0.03	chr1:201215785|missense_variant|3081|T/I|MODERATE|IGFN1|deleterious(0.02)|probably_damaging(0.988);chr1:201215785|missense_variant|624|T/I|MODERATE|IGFN1|deleterious(0.03)|possibly_damaging(0.773);	204	0.115254
chr1	58653976	G	T	missense_variant|IGFN1|p.Lys1018Asn	0	chr1:201224840|missense_variant|3484|K/N|MODERATE|IGFN1|deleterious(0.01)|probably_damaging(0.994);chr1:201224840|missense_variant|1027|K/N|MODERATE|IGFN1|deleterious(0.02)|probably_damaging(0.971);	127	0.0717514
chr1	58803021	C	G	missense_variant|LAD1|p.Gln503His	0	chr1:201382288|missense_variant|504|Q/H|MODERATE|LAD1|deleterious(0)|probably_damaging(0.998);	28	0.0158192
chr1	58809931	C	T	missense_variant&splice_region_variant|LAD1|p.Arg61Lys	0	chr1:201389160|missense_variant,splice_region_variant|61|R/K|MODERATE|LAD1|deleterious(0.03)|possibly_damaging(0.906);	45	0.0254237
chr1	59754337	G	T	missense_variant|LGR6|p.Gly959Cys	0	chr1:202319181|missense_variant|960|G/C|MODERATE|LGR6|deleterious_low_confidence(0.01)|possibly_damaging(0.855);chr1:202319181|missense_variant|821|G/C|MODERATE|LGR6|deleterious_low_confidence(0.01)|possibly_damaging(0.91);chr1:202319181|missense_variant|908|G/C|MODERATE|LGR6|deleterious_low_confidence(0.01)|possibly_damaging(0.91);	131	0.0740113
chr1	61621981	C	G	missense_variant|SOX13|p.Ser95Cys	0	chr1:204114388|missense_variant|96|S/C|MODERATE|SOX13|deleterious(0.01)|possibly_damaging(0.641);chr1:204114388|missense_variant|96|S/C|MODERATE|SOX13|deleterious(0.01)|possibly_damaging(0.641);	86	0.0485876
chr1	64419662	G	T	missense_variant|FCMR|p.Pro360His;missense_variant|FCMR|p.Pro351His	0.02	chr1:206905134|missense_variant|241|P/H|MODERATE|FCMR|deleterious(0)|probably_damaging(0.998);chr1:206905134|missense_variant|353|P/H|MODERATE|FCMR|deleterious(0)|probably_damaging(0.992);	38	0.0214689
chr1	64660023	T	G	missense_variant|C4BPA|p.Leu594Trp	0.02	chr1:207144701|missense_variant|593|L/W|MODERATE|C4BPA|deleterious(0.01)|probably_damaging(0.987);chr1:207144701|missense_variant|593|L/W|MODERATE|C4BPA|deleterious(0.01)|probably_damaging(0.987);chr1:207144701|missense_variant|593|L/W|MODERATE|C4BPA|deleterious(0.01)|probably_damaging(0.987);	309	0.174576
chr1	64987236	C	G	missense_variant|CR2|p.Pro651Ala;missense_variant|CR2|p.Pro653Ala;missense_variant|CR2|p.Pro653Ala	0	chr1:207473155|missense_variant|652|P/A|MODERATE|CR2|deleterious(0.02)|probably_damaging(1);chr1:207473155|missense_variant|652|P/A|MODERATE|CR2|deleterious(0.01)|probably_damaging(1);	53	0.0299435
chr1	64987793	C	T	missense_variant|CR2|p.Pro714Leu	0.02	chr1:207473710|missense_variant|715|P/L|MODERATE|CR2|deleterious(0.03)|probably_damaging(1);	109	0.0615819
chr1	65068823	C	T	missense_variant|CR1|p.Thr899Ile	0.01	chr1:207567917|missense_variant|1349|T/I|MODERATE|CR1|deleterious(0.04)|possibly_damaging(0.752);	831	0.469492
chr1	65112769	T	C	missense_variant|CR1|p.Val1738Ala	0	chr1:207612029|missense_variant|2188|V/A|MODERATE|CR1|deleterious(0.03)|possibly_damaging(0.951);	186	0.105085
chr1	65115156	C	T	missense_variant|CR1|p.Ser1749Phe	0	chr1:207614424|missense_variant|2199|S/F|MODERATE|CR1|deleterious(0.03)|probably_damaging(0.999);	30	0.0169492
chr1	65115218	G	A	missense_variant|CR1|p.Glu1770Lys	0	chr1:207614486|missense_variant|2220|E/K|MODERATE|CR1|deleterious(0.05)|probably_damaging(0.997);	11	0.00621469
chr1	67347855	T	C	missense_variant|UTP25|p.Ile458Thr	0.01	chr1:209840946|missense_variant|459|I/T|MODERATE|UTP25|deleterious(0)|probably_damaging(0.975);	62	0.0350282
chr1	67349539	G	A	missense_variant|UTP25|p.Gly565Ser	0	chr1:209842610|missense_variant|566|G/S|MODERATE|UTP25|deleterious(0.01)|probably_damaging(1);	477	0.269492
chr1	70114779	G	C	missense_variant|GARIN4|p.Ala348Pro	0	chr1:212625919|missense_variant|348|A/P|MODERATE|GARIN4|deleterious(0.02)|probably_damaging(0.99);	5	0.00282486
chr1	70115395	T	G	missense_variant|GARIN4|p.Met553Arg	0.02	chr1:212626535|missense_variant|553|M/R|MODERATE|GARIN4|deleterious(0)|possibly_damaging(0.523);	1013	0.572316
chr1	70697387	A	C	missense_variant|RPS6KC1|p.Glu700Ala;missense_variant|RPS6KC1|p.Glu700Ala;missense_variant|RPS6KC1|p.Glu700Ala;missense_variant|RPS6KC1|p.Glu669Ala;missense_variant|RPS6KC1|p.Glu688Ala;missense_variant|RPS6KC1|p.Glu700Ala;missense_variant|RPS6KC1|p.Glu684Ala	0.03	chr1:213241575|missense_variant|688|E/A|MODERATE|RPS6KC1|deleterious(0)|possibly_damaging(0.917);chr1:213241575|missense_variant|488|E/A|MODERATE|RPS6KC1|deleterious(0.01)|possibly_damaging(0.94);chr1:213241575|missense_variant|488|E/A|MODERATE|RPS6KC1|deleterious(0.01)|possibly_damaging(0.94);chr1:213241575|missense_variant|235|E/A|MODERATE|RPS6KC1|deleterious(0.01)|possibly_damaging(0.917);chr1…	55	0.0310734
chr1	72068874	A	G	missense_variant|CENPF|p.Asn98Ser	0	chr1:214614962|missense_variant|98|N/S|MODERATE|CENPF|deleterious(0.05)|possibly_damaging(0.863);chr1:214614962|missense_variant|98|N/S|MODERATE|CENPF|deleterious(0.05)|possibly_damaging(0.863);	113	0.0638418
chr1	72084078	A	G	missense_variant|CENPF|p.Glu379Gly	0	chr1:214629113|missense_variant|379|E/G|MODERATE|CENPF|deleterious(0.02)|probably_damaging(0.996);chr1:214629113|missense_variant|379|E/G|MODERATE|CENPF|deleterious(0.02)|probably_damaging(0.996);	42	0.0237288
chr1	72093032	A	G	missense_variant|CENPF|p.Glu508Gly	0	chr1:214637942|missense_variant|508|E/G|MODERATE|CENPF|deleterious(0)|probably_damaging(0.969);chr1:214637942|missense_variant|508|E/G|MODERATE|CENPF|deleterious(0)|probably_damaging(0.969);	28	0.0158192
chr1	72095566	A	C	missense_variant|CENPF|p.Glu759Ala	0	chr1:214640614|missense_variant|759|E/A|MODERATE|CENPF|deleterious(0.01)|probably_damaging(0.981);chr1:214640614|missense_variant|759|E/A|MODERATE|CENPF|deleterious(0.01)|probably_damaging(0.981);	44	0.0248588
chr1	72096259	A	C	missense_variant|CENPF|p.Lys990Thr	0	chr1:214641307|missense_variant|990|K/T|MODERATE|CENPF|deleterious(0)|probably_damaging(0.997);chr1:214641307|missense_variant|990|K/T|MODERATE|CENPF|deleterious(0)|probably_damaging(0.997);	146	0.0824859
chr1	72096985	A	G	missense_variant|CENPF|p.Glu1232Gly	0	chr1:214642033|missense_variant|1232|E/G|MODERATE|CENPF|deleterious(0.01)|possibly_damaging(0.721);chr1:214642033|missense_variant|1232|E/G|MODERATE|CENPF|deleterious(0.01)|possibly_damaging(0.721);	44	0.0248588
chr1	73163281	G	A	missense_variant|USH2A|p.Ser4653Phe	0.01	chr1:215671144|missense_variant|4654|S/F|MODERATE|USH2A|deleterious(0.04)|possibly_damaging(0.901);	206	0.116384
chr1	73163362	G	A	missense_variant|USH2A|p.Thr4626Met	0	chr1:215671225|missense_variant|4627|T/I|MODERATE|USH2A|deleterious(0)|probably_damaging(1);	318	0.179661
chr1	73172455	A	G	missense_variant|USH2A|p.Ile4040Thr	0	chr1:215680321|missense_variant|4041|I/T|MODERATE|USH2A|deleterious(0)|probably_damaging(0.968);	131	0.0740113
chr1	73436626	G	T	missense_variant|USH2A|p.Leu2380Met	0	chr1:215934775|missense_variant|2381|L/M|MODERATE|USH2A|deleterious(0.03)|probably_damaging(0.988);	72	0.040678
chr1	73564488	G	C	missense_variant|USH2A|p.Arg1945Gly	0	chr1:216072910|missense_variant|1946|R/G|MODERATE|USH2A|deleterious(0.01)|probably_damaging(1);	37	0.020904
chr1	73670287	G	C	missense_variant|USH2A|p.Pro1471Arg	0.02	chr1:216175464|missense_variant|1472|P/R|MODERATE|USH2A|deleterious(0.01)|possibly_damaging(0.935);chr1:216175464|missense_variant|1472|P/R|MODERATE|USH2A|deleterious(0.01)|possibly_damaging(0.933);	303	0.171186
chr1	73695059	C	T	missense_variant|USH2A|p.Cys1222Tyr	0	chr1:216199770|missense_variant|1223|C/Y|MODERATE|USH2A|deleterious(0)|probably_damaging(1);chr1:216199770|missense_variant|1223|C/Y|MODERATE|USH2A|deleterious(0)|probably_damaging(1);	45	0.0254237
chr1	75272174	C	A	missense_variant|SPATA17|p.Pro260Thr;missense_variant|SPATA17|p.Pro260Thr;missense_variant|SPATA17|p.Pro230Thr	0	chr1:217782228|missense_variant|260|P/T|MODERATE|SPATA17|deleterious(0)|probably_damaging(1);chr1:217782228|missense_variant|260|P/T|MODERATE|SPATA17|deleterious(0)|probably_damaging(1);	39	0.0220339
chr1	75842709	G	C	missense_variant|TGFB2|p.Glu38Gln;missense_variant|TGFB2|p.Glu38Gln	0	chr1:218346813|missense_variant|38|E/Q|MODERATE|TGFB2|deleterious(0.04)|probably_damaging(0.998);chr1:218346813|missense_variant|38|E/Q|MODERATE|TGFB2|deleterious(0.03)|probably_damaging(0.998);	4	0.00225989
chr1	80318148	G	A	missense_variant|MIA3|p.Glu1610Lys;missense_variant|MIA3|p.Glu1610Lys	0	chr1:222658738|missense_variant|420|E/K|MODERATE|MIA3|deleterious(0.02)|probably_damaging(1);chr1:222658738|missense_variant|1542|E/K|MODERATE|MIA3|deleterious(0)|probably_damaging(0.992);chr1:222658738|missense_variant|1483|E/K|MODERATE|MIA3|deleterious(0)|probably_damaging(1);chr1:222658738|missense_variant|1378|E/K|MODERATE|MIA3|deleterious(0)|probably_damaging(0.999);chr1:222658738|missense_v…	2	0.00112994
chr1	80786497	G	A	missense_variant|TLR5|p.Leu541Phe	0.01	chr1:223111411|missense_variant|541|L/F|MODERATE|TLR5|deleterious(0)|probably_damaging(0.999);chr1:223111411|missense_variant|541|L/F|MODERATE|TLR5|deleterious(0)|probably_damaging(0.999);chr1:223111411|missense_variant|541|L/F|MODERATE|TLR5|deleterious(0)|probably_damaging(0.999);chr1:223111411|missense_variant|541|L/F|MODERATE|TLR5|deleterious(0)|probably_damaging(0.999);chr1:223111411|missense…	381	0.215254
chr1	80787118	C	T	missense_variant|TLR5|p.Gly334Arg	0.03	chr1:223112032|missense_variant|334|G/R|MODERATE|TLR5|deleterious(0)|probably_damaging(1);chr1:223112032|missense_variant|334|G/R|MODERATE|TLR5|deleterious(0)|probably_damaging(1);chr1:223112032|missense_variant|334|G/R|MODERATE|TLR5|deleterious(0)|probably_damaging(1);chr1:223112032|missense_variant|334|G/R|MODERATE|TLR5|deleterious(0)|probably_damaging(1);chr1:223112032|missense_variant|334|G/R…	70	0.039548
chr1	80905139	G	A	missense_variant|SUSD4|p.Pro425Leu;missense_variant|SUSD4|p.Pro327Leu;missense_variant|SUSD4|p.Pro425Leu	0	chr1:223223422|missense_variant|424|P/L|MODERATE|SUSD4|deleterious(0)|possibly_damaging(0.926);chr1:223223422|missense_variant|496|P/L|MODERATE|SUSD4|deleterious_low_confidence(0)|possibly_damaging(0.717);chr1:223223422|missense_variant|424|P/L|MODERATE|SUSD4|deleterious(0)|possibly_damaging(0.926);	37	0.020904
chr1	81210565	C	T	missense_variant|CAPN8|p.Met630Ile;missense_variant|CAPN8|p.Met591Ile	0.03	chr1:223544794|missense_variant|630|M/I|MODERATE|CAPN8|deleterious(0.04)|possibly_damaging(0.712);	69	0.0389831
chr1	81215116	A	G	missense_variant|CAPN8|p.Ile577Thr;missense_variant|CAPN8|p.Ile538Thr	0.01	chr1:223549352|missense_variant|577|I/T|MODERATE|CAPN8|deleterious(0.03)|possibly_damaging(0.873);	672	0.379661
chr1	81245984	G	T	missense_variant|CAPN8|p.Leu120Met;missense_variant|CAPN8|p.Leu81Met	0.03	chr1:223628730|missense_variant|120|L/M|MODERATE|CAPN8|deleterious(0)|probably_damaging(0.992);chr1:223628730|missense_variant|120|L/M|MODERATE|CAPN8|deleterious(0)|possibly_damaging(0.94);	39	0.0220339
chr1	83327638	G	A	missense_variant|SRP9|p.Arg72Gln	0	chr1:225786946|missense_variant|76|G/S|MODERATE|SRP9|deleterious_low_confidence(0)|probably_damaging(0.998);	163	0.0920904
chr1	83399864	G	A	missense_variant|TMEM63A|p.Thr326Met;missense_variant|EPHX1|p.Val428Ile;missense_variant|TMEM63A|p.Thr326Met;missense_variant|TMEM63A|p.Thr325Met	0.01	chr1:225862329|missense_variant|325|T/I|MODERATE|TMEM63A|deleterious(0.01)|possibly_damaging(0.726);chr1:225862329|missense_variant|325|T/I|MODERATE|TMEM63A|deleterious(0.01)|possibly_damaging(0.726);	29	0.0163842
chr1	83708981	C	A	missense_variant|ACBD3|p.Val119Phe	0.04	chr1:226165932|missense_variant|119|V/F|MODERATE|ACBD3|deleterious(0)|probably_damaging(1);	40	0.0225989
chr1	84539379	C	T	missense_variant|COQ8A|p.Thr174Ile;missense_variant|COQ8A|p.Thr174Ile	0.02	chr1:226965343|missense_variant|174|T/I|MODERATE|COQ8A|deleterious(0)|probably_damaging(0.968);chr1:226965343|missense_variant|174|T/I|MODERATE|COQ8A|deleterious(0)|probably_damaging(0.968);chr1:226965343|missense_variant|174|T/I|MODERATE|COQ8A|deleterious(0)|probably_damaging(0.968);chr1:226965343|missense_variant|174|T/I|MODERATE|COQ8A|deleterious(0)|probably_damaging(0.968);chr1:226965343|miss…	24	0.0135593
chr1	89783001	G	A	missense_variant&splice_region_variant|PPOX|p.Arg207Trp;missense_variant&splice_region_variant|PPOX|p.Arg207Trp;missense_variant&splice_region_variant|PPOX|p.Arg207Trp;missense_variant&splice_region_variant|PPOX|p.Arg207Trp;missense_variant&splice_region_variant|PPOX|p.Arg207Trp	0.02	chr1:161168995|missense_variant,splice_region_variant|207|R/W|MODERATE|PPOX|deleterious(0.04)|possibly_damaging(0.904);chr1:161168995|missense_variant,splice_region_variant|207|R/W|MODERATE|PPOX|deleterious(0.04)|possibly_damaging(0.904);chr1:161168995|missense_variant,splice_region_variant|174|R/W|MODERATE|PPOX|deleterious(0.05)|probably_damaging(0.977);chr1:161168995|missense_variant,splice_reg…	56	0.0316384
chr1	89823402	G	A	missense_variant|DEDD|p.Arg83His;missense_variant|DEDD|p.Arg83His;missense_variant|DEDD|p.Arg83His;missense_variant|DEDD|p.Arg83His;missense_variant|DEDD|p.Arg83His;missense_variant|DEDD|p.Arg83His	0	chr1:161124215|missense_variant|83|R/H|MODERATE|DEDD|deleterious(0.04)|probably_damaging(0.999);chr1:161124215|missense_variant|83|R/H|MODERATE|DEDD|deleterious(0.04)|probably_damaging(0.999);chr1:161124215|missense_variant|83|R/H|MODERATE|DEDD|deleterious(0.02)|probably_damaging(1);chr1:161124215|missense_variant|83|R/H|MODERATE|DEDD|deleterious(0.04)|probably_damaging(0.999);chr1:161124215|miss…	2	0.00112994
chr1	89874902	C	T	missense_variant|NECTIN4|p.Thr400Met;missense_variant|NECTIN4|p.Thr406Met;missense_variant|NECTIN4|p.Thr406Met	0.01	chr1:161073736|missense_variant|406|T/M|MODERATE|NECTIN4|deleterious(0.01)|possibly_damaging(0.882);	9	0.00508475
chr1	89982164	A	T	missense_variant|ITLN2|p.Glu54Val	0	chr1:160952649|missense_variant|55|E/V|MODERATE|ITLN2|deleterious(0.01)|possibly_damaging(0.529);	322	0.181921
chr1	89984206	G	A	missense_variant|ITLN2|p.Gly190Arg	0	chr1:160950579|missense_variant|192|G/R|MODERATE|ITLN2|deleterious(0.01)|possibly_damaging(0.558);	335	0.189266
chr1	89987214	G	A	missense_variant|ITLN2|p.Gly269Arg	0	chr1:160945274|missense_variant|282|G/R|MODERATE|ITLN2|deleterious(0.01)|probably_damaging(0.999);	150	0.0847458
chr1	89987224	C	T	missense_variant|ITLN2|p.Pro272Leu	0	chr1:160945264|missense_variant|285|P/L|MODERATE|ITLN2|deleterious(0.02)|probably_damaging(0.994);	356	0.20113
chr1	90095000	C	T	missense_variant|CD244|p.Thr283Met	0.03	chr1:160834103|missense_variant|308|T/M|MODERATE|CD244|deleterious(0)|probably_damaging(1);chr1:160834103|missense_variant|211|T/M|MODERATE|CD244|deleterious(0)|probably_damaging(1);chr1:160834103|missense_variant|303|T/M|MODERATE|CD244|deleterious(0)|probably_damaging(1);chr1:160834103|missense_variant|303|T/M|MODERATE|CD244|deleterious(0)|probably_damaging(1);	83	0.0468927
chr1	90272240	C	T	missense_variant|SLAMF1|p.Pro289Leu	0	chr1:160623507|missense_variant|290|P/L|MODERATE|SLAMF1|deleterious_low_confidence(0.01)|probably_damaging(0.958);	241	0.136158
chr1	90276249	A	C	missense_variant|SLAMF1|p.Lys303Thr;missense_variant|SLAMF1|p.Lys276Asn;missense_variant|SLAMF1|p.Lys246Asn	0	chr1:160619812|missense_variant|304|K/T|MODERATE|SLAMF1|deleterious_low_confidence(0.01)|possibly_damaging(0.574);	34	0.019209
chr1	90365486	C	T	missense_variant|CD84|p.Arg331Trp;missense_variant|CD84|p.Arg314Trp	0.01	chr1:160548303|stop_gained|331|Q/*|HIGH|CD84|-|-;chr1:160548303|stop_gained|200|Q/*|HIGH|CD84|-|-;chr1:160548303|stop_gained|325|Q/*|HIGH|CD84|-|-;chr1:160548303|stop_gained|314|Q/*|HIGH|CD84|-|-;chr1:160548303|stop_gained|211|Q/*|HIGH|CD84|-|-;	119	0.0672316
chr1	90905661	A	G	missense_variant|PIGM|p.Tyr35Cys	0	chr1:160031636|missense_variant|35|Y/C|MODERATE|PIGM|deleterious(0)|probably_damaging(1);	82	0.0463277
chr1	90990329	T	C	missense_variant|SLAMF9|p.Cys154Arg	0	chr1:159952460|missense_variant|156|C/R|MODERATE|SLAMF9|deleterious(0)|probably_damaging(1);	32	0.0180791
chr1	92012133	T	G	missense_variant|PYHIN1|p.Lys303Thr;missense_variant|PYHIN1|p.Lys262Thr;missense_variant|PYHIN1|p.Lys262Thr;missense_variant|PYHIN1|p.Lys262Thr	0	chr1:158942182|missense_variant|262|K/T|MODERATE|PYHIN1|deleterious(0)|probably_damaging(1);chr1:158942182|missense_variant|253|K/T|MODERATE|PYHIN1|deleterious(0)|probably_damaging(1);chr1:158942182|missense_variant|262|K/T|MODERATE|PYHIN1|deleterious(0)|probably_damaging(0.999);chr1:158942182|missense_variant|253|K/T|MODERATE|PYHIN1|deleterious(0)|probably_damaging(1);chr1:158942182|missense_var…	12	0.00677966
chr1	92176777	T	C	missense_variant|OR6N1|p.Phe104Ser	0	chr1:158766372|missense_variant|104|F/S|MODERATE|OR6N1|deleterious(0)|probably_damaging(0.998);chr1:158766372|missense_variant|104|F/S|MODERATE|OR6N1|deleterious(0)|probably_damaging(0.998);chr1:158766372|missense_variant|104|F/S|MODERATE|OR6N1|deleterious(0)|probably_damaging(0.998);chr1:158766372|missense_variant|104|F/S|MODERATE|OR6N1|deleterious(0)|probably_damaging(0.998);	229	0.129379
chr1	92176852	C	T	missense_variant|OR6N1|p.Pro129Leu	0	chr1:158766297|missense_variant|129|P/L|MODERATE|OR6N1|deleterious(0.01)|probably_damaging(1);chr1:158766297|missense_variant|129|P/L|MODERATE|OR6N1|deleterious(0.01)|probably_damaging(1);chr1:158766297|missense_variant|129|P/L|MODERATE|OR6N1|deleterious(0.01)|probably_damaging(1);chr1:158766297|missense_variant|129|P/L|MODERATE|OR6N1|deleterious(0.01)|probably_damaging(1);	35	0.019774
chr1	92177197	A	T	missense_variant|OR6N1|p.His244Leu	0	chr1:158765952|missense_variant|244|H/L|MODERATE|OR6N1|deleterious(0)|probably_damaging(1);chr1:158765952|missense_variant|244|H/L|MODERATE|OR6N1|deleterious(0)|probably_damaging(1);chr1:158765952|missense_variant|244|H/L|MODERATE|OR6N1|deleterious(0)|probably_damaging(1);chr1:158765952|missense_variant|244|H/L|MODERATE|OR6N1|deleterious(0)|probably_damaging(1);	39	0.0220339
chr1	92185161	A	G	missense_variant|OR6K6|p.Leu222Pro	0.04	chr1:158755480|missense_variant|198|L/P|MODERATE|OR6K6|deleterious(0.04)|probably_damaging(0.983);	301	0.170056
chr1	92250478	A	T	missense_variant|OR6K2|p.Asp273Val	0.01	chr1:158699838|missense_variant|272|D/V|MODERATE|OR6K2|deleterious(0)|probably_damaging(0.999);	109	0.0615819
chr1	92324826	G	C	missense_variant|SPTA1|p.Lys1952Asn;missense_variant|SPTA1|p.Lys1952Asn;missense_variant|SPTA1|p.Lys1915Asn	0.02	chr1:158626200|missense_variant|1952|K/N|MODERATE|SPTA1|deleterious(0)|possibly_damaging(0.868);chr1:158626200|missense_variant|1952|K/N|MODERATE|SPTA1|deleterious(0)|possibly_damaging(0.868);	136	0.0768362
chr1	92338037	A	T	missense_variant|SPTA1|p.Glu2224Asp;missense_variant|SPTA1|p.Glu2218Asp;missense_variant|SPTA1|p.Glu2187Asp	0	chr1:158615332|missense_variant|2224|E/D|MODERATE|SPTA1|deleterious(0)|probably_damaging(1);chr1:158615332|missense_variant|2224|E/D|MODERATE|SPTA1|deleterious(0)|probably_damaging(1);	20	0.0112994
chr1	92391531	C	T	missense_variant|OR6P1|p.Arg261Trp	0.03	chr1:158562824|missense_variant|261|R/W|MODERATE|OR6P1|deleterious(0.03)|probably_damaging(1);	57	0.0322034
chr1	92565209	C	G	missense_variant|OR10K2|p.Ser110Cys	0	chr1:158420538|missense_variant|110|S/C|MODERATE|OR10K2|deleterious(0)|probably_damaging(0.998);	211	0.119209
chr1	92565377	T	A	missense_variant|OR10K2|p.Leu166Gln	0.02	chr1:158420370|missense_variant|166|L/Q|MODERATE|OR10K2|deleterious(0.01)|probably_damaging(0.999);	401	0.226554
chr1	92650581	T	G	missense_variant|CD1E|p.Ser340Arg;missense_variant|CD1E|p.Ser283Arg;missense_variant|CD1E|p.Ser334Arg	0	chr1:158356069|missense_variant|290|S/R|MODERATE|CD1E|deleterious(0.01)|probably_damaging(0.999);chr1:158356069|missense_variant|101|S/R|MODERATE|CD1E|deleterious(0.01)|probably_damaging(0.972);chr1:158356069|missense_variant|200|S/R|MODERATE|CD1E|deleterious(0)|probably_damaging(0.988);chr1:158356069|missense_variant|101|S/R|MODERATE|CD1E|deleterious(0.01)|probably_damaging(0.972);chr1:158356069…	153	0.0864407
chr1	92652015	G	A	missense_variant|CD1E|p.Arg156Trp;missense_variant|CD1E|p.Arg99Trp;missense_variant|CD1E|p.Arg150Trp	0	chr1:158354634|stop_gained|106|Q/*|HIGH|CD1E|-|-;chr1:158354634|stop_gained|106|Q/*|HIGH|CD1E|-|-;chr1:158354634|stop_gained|106|Q/*|HIGH|CD1E|-|-;chr1:158354634|stop_gained|106|Q/*|HIGH|CD1E|-|-;chr1:158354634|stop_gained|106|Q/*|HIGH|CD1E|-|-;chr1:158354634|stop_gained|106|Q/*|HIGH|CD1E|-|-;chr1:158354634|stop_gained|106|Q/*|HIGH|CD1E|-|-;chr1:158354634|stop_gained|106|Q/*|HIGH|CD1E|-|-;chr1:15…	66	0.0372881
chr1	92720972	A	T	missense_variant|CD1C|p.Val265Glu;missense_variant|CD1C|p.Val264Glu;missense_variant|CD1C|p.Val259Glu	0.02	chr1:158292782|missense_variant|266|V/E|MODERATE|CD1C|deleterious(0)|possibly_damaging(0.882);	280	0.158192
chr1	92722510	A	C	missense_variant|CD1C|p.His55Gln;missense_variant|CD1C|p.His54Gln;missense_variant|CD1C|p.His49Gln	0.04	chr1:158291240|missense_variant|56|H/Q|MODERATE|CD1C|deleterious(0.02)|probably_damaging(0.987);	185	0.10452
chr1	93293904	T	G	missense_variant|FCRL3|p.Phe128Cys	0	chr1:157697886|missense_variant|111|F/C|MODERATE|FCRL3|deleterious(0)|probably_damaging(1);chr1:157697886|missense_variant|111|F/C|MODERATE|FCRL3|deleterious(0)|probably_damaging(1);chr1:157697886|missense_variant|111|F/C|MODERATE|FCRL3|deleterious(0)|probably_damaging(1);	15	0.00847458
chr1	93294421	G	A	missense_variant|FCRL3|p.Gly222Arg	0.01	chr1:157697374|missense_variant|204|G/R|MODERATE|FCRL3|deleterious(0)|probably_damaging(1);chr1:157697374|missense_variant|204|G/R|MODERATE|FCRL3|deleterious(0)|probably_damaging(1);chr1:157697374|missense_variant|204|G/R|MODERATE|FCRL3|deleterious(0)|probably_damaging(1);	57	0.0322034
chr1	94027893	C	T	missense_variant|ARHGEF11|p.Arg1437Trp;missense_variant|ARHGEF11|p.Arg1396Trp;missense_variant|ARHGEF11|p.Arg1426Trp;missense_variant|ARHGEF11|p.Arg1390Trp	0.02	chr1:156937380|stop_gained|1434|Q/*|HIGH|ARHGEF11|-|-;chr1:156937380|stop_gained|1427|Q/*|HIGH|ARHGEF11|-|-;chr1:156937380|stop_gained|1397|Q/*|HIGH|ARHGEF11|-|-;chr1:156937380|stop_gained|1437|Q/*|HIGH|ARHGEF11|-|-;chr1:156937380|stop_gained|1438|Q/*|HIGH|ARHGEF11|-|-;chr1:156937380|stop_gained|1016|Q/*|HIGH|ARHGEF11|-|-;chr1:156937380|stop_gained|1454|Q/*|HIGH|ARHGEF11|-|-;chr1:156937380|stop_g…	123	0.0694915
chr1	94295043	G	T	missense_variant|NES|p.Asp1244Tyr	0.01	chr1:156670761|missense_variant|1143|D/Y|MODERATE|NES|deleterious(0)|possibly_damaging(0.718);	16	0.00903955
chr1	94434946	G	T	missense_variant|IQGAP3|p.Gly1461Trp	0.01	chr1:156530128|missense_variant|1461|G/W|MODERATE|IQGAP3|deleterious(0)|probably_damaging(0.995);	18	0.0101695
chr1	94666649	G	A	missense_variant|VHLL|p.Arg46His	0	chr1:156299053|missense_variant|46|R/H|MODERATE|VHLL|deleterious(0)|probably_damaging(1);	140	0.079096
chr1	95147451	A	G	missense_variant|GON4L|p.Asp41Gly;missense_variant|GON4L|p.Asp41Gly;missense_variant|GON4L|p.Asp41Gly;missense_variant|GON4L|p.Asp41Gly	0	chr1:155853659|missense_variant|41|D/G|MODERATE|GON4L|deleterious_low_confidence(0)|possibly_damaging(0.805);chr1:155853659|missense_variant|41|D/G|MODERATE|GON4L|deleterious_low_confidence(0)|possibly_damaging(0.877);chr1:155853659|missense_variant|41|D/G|MODERATE|GON4L|deleterious_low_confidence(0)|possibly_damaging(0.805);chr1:155853659|missense_variant|41|D/G|MODERATE|GON4L|deleterious_low_co…	39	0.0220339
chr1	96043890	G	A	missense_variant|FLAD1|p.Leu383Phe;missense_variant|FLAD1|p.Leu77Phe	0.03	chr1:154990184|missense_variant|334|L/F|MODERATE|FLAD1|deleterious(0.04)|probably_damaging(1);chr1:154990184|missense_variant|431|L/F|MODERATE|FLAD1|deleterious(0.05)|probably_damaging(1);chr1:154990184|missense_variant|334|L/F|MODERATE|FLAD1|deleterious(0.04)|probably_damaging(1);	5	0.00282486
chr1	96086487	C	G	missense_variant|PBXIP1|p.Pro671Arg;missense_variant|PBXIP1|p.Pro611Arg;missense_variant|PBXIP1|p.Pro640Arg;missense_variant|PBXIP1|p.Pro640Arg;missense_variant|PBXIP1|p.Pro630Arg;missense_variant|PBXIP1|p.Pro633Arg	0	chr1:154945764|missense_variant|608|P/R|MODERATE|PBXIP1|deleterious(0)|probably_damaging(0.998);chr1:154945764|missense_variant|482|P/R|MODERATE|PBXIP1|deleterious(0)|probably_damaging(0.998);chr1:154945764|missense_variant|637|P/R|MODERATE|PBXIP1|deleterious(0)|probably_damaging(0.998);	10	0.00564972
chr1	96552174	C	T	missense_variant|SHE|p.Arg313Trp;missense_variant|SHE|p.Arg313Trp	0.01	chr1:154489138|missense_variant|313|R/W|MODERATE|SHE|deleterious(0)|probably_damaging(0.998);chr1:154489138|missense_variant|313|R/W|MODERATE|SHE|deleterious(0)|probably_damaging(0.998);	187	0.10565
chr1	97090284	T	C	missense_variant|CREB3L4|p.Lys239Glu;missense_variant|CREB3L4|p.Lys239Glu	0.01	chr1:153973050|missense_variant|239|K/E|MODERATE|CREB3L4|deleterious(0)|probably_damaging(0.992);chr1:153973050|missense_variant|239|K/E|MODERATE|CREB3L4|deleterious(0)|probably_damaging(0.992);chr1:153973050|missense_variant|219|K/E|MODERATE|CREB3L4|deleterious(0)|probably_damaging(0.977);chr1:153973050|missense_variant|219|K/E|MODERATE|CREB3L4|deleterious(0)|probably_damaging(0.977);chr1:153973…	9	0.00508475
chr1	97107843	G	C	missense_variant|CRTC2|p.Ser129Thr;missense_variant|CRTC2|p.Ala61Pro	0.03	chr1:153954309|missense_variant|127|S/T|MODERATE|CRTC2|deleterious(0)|probably_damaging(0.985);	206	0.116384
chr1	97529294	T	G	missense_variant|S100A5|p.Val13Gly	0	chr1:153540154|missense_variant|13|V/G|MODERATE|S100A5|deleterious(0)|probably_damaging(0.999);chr1:153540154|missense_variant|13|V/G|MODERATE|S100A5|deleterious(0)|probably_damaging(0.999);chr1:153540154|missense_variant|13|V/G|MODERATE|S100A5|deleterious(0)|probably_damaging(0.999);chr1:153540154|missense_variant|13|V/G|MODERATE|S100A5|deleterious(0)|probably_damaging(0.999);chr1:153540154|miss…	3	0.00169492
chr1	97529381	T	A	missense_variant|S100A5|p.Leu42Gln	0	chr1:153540067|missense_variant|42|L/Q|MODERATE|S100A5|deleterious(0)|probably_damaging(1);chr1:153540067|missense_variant|42|L/Q|MODERATE|S100A5|deleterious(0)|probably_damaging(1);chr1:153540067|missense_variant|42|L/Q|MODERATE|S100A5|deleterious(0)|probably_damaging(1);chr1:153540067|missense_variant|42|L/Q|MODERATE|S100A5|deleterious(0)|probably_damaging(1);chr1:153540067|missense_variant|42|…	18	0.0101695
chr1	97532005	G	T	missense_variant|S100A5|p.Asp53Tyr	0.01	chr1:153537418|missense_variant|53|D/Y|MODERATE|S100A5|deleterious(0)|probably_damaging(1);chr1:153537418|missense_variant|53|D/Y|MODERATE|S100A5|deleterious(0)|probably_damaging(1);chr1:153537418|missense_variant|53|D/Y|MODERATE|S100A5|deleterious(0)|probably_damaging(1);chr1:153537418|missense_variant|53|D/Y|MODERATE|S100A5|deleterious(0)|probably_damaging(1);chr1:153537418|missense_variant|53|…	4	0.00225989
chr1	97532060	A	C	missense_variant|S100A5|p.Glu71Ala	0.01	chr1:153537363|missense_variant|71|E/A|MODERATE|S100A5|deleterious(0)|probably_damaging(0.999);chr1:153537363|missense_variant|71|E/A|MODERATE|S100A5|deleterious(0)|probably_damaging(0.999);chr1:153537363|missense_variant|71|E/A|MODERATE|S100A5|deleterious(0)|probably_damaging(0.999);chr1:153537363|missense_variant|71|E/A|MODERATE|S100A5|deleterious(0)|probably_damaging(0.999);chr1:153537363|miss…	15	0.00847458
chr1	97683064	T	C	missense_variant|S100A12|p.Leu39Pro	0	chr1:153374471|missense_variant|41|L/P|MODERATE|S100A12|deleterious(0)|probably_damaging(1);	40	0.0225989
chr1	98272725	T	C	missense_variant|LCE1C|p.Cys109Arg	0.01	chr1:152805130|missense_variant|87|C/R|MODERATE|LCE1C|-|possibly_damaging(0.904);chr1:152805130|missense_variant|117|C/R|MODERATE|LCE1C|deleterious_low_confidence(0)|possibly_damaging(0.904);	41	0.0231638
chr1	98545302	G	T	missense_variant|CRCT1|p.Pro33His	0.01	chr1:152515481|missense_variant|33|P/H|MODERATE|CRCT1|-|probably_damaging(0.992);chr1:152515481|missense_variant|33|P/H|MODERATE|CRCT1|-|probably_damaging(0.992);	63	0.0355932
chr1	98694327	C	T	missense_variant|FLG2|p.Ser477Phe	0	chr1:152356356|missense_variant|477|S/F|MODERATE|FLG2|deleterious(0)|probably_damaging(0.997);	56	0.0316384
chr1	98889989	G	T	missense_variant|RPTN|p.Asp66Tyr	0.02	chr1:152156903|missense_variant|66|D/Y|MODERATE|RPTN|deleterious(0)|possibly_damaging(0.94);	214	0.120904
chr1	98935407	T	G	missense_variant|TCHH|p.Cys103Trp	0.02	chr1:152112908|missense_variant|103|C/W|MODERATE|TCHH|deleterious_low_confidence(0.02)|probably_damaging(0.96);	500	0.282486
chr1	98937233	G	T	missense_variant|TCHH|p.Arg712Met	0.02	chr1:152110881|missense_variant|779|R/M|MODERATE|TCHH|deleterious_low_confidence(0)|probably_damaging(1);	10	0.00564972
chr1	98937238	C	T	missense_variant|TCHH|p.Arg714Cys	0.01	chr1:152110876|missense_variant|781|R/C|MODERATE|TCHH|deleterious_low_confidence(0)|probably_damaging(0.999);	80	0.0451977
chr1	98937626	A	T	missense_variant|TCHH|p.Glu843Val	0.01	chr1:152110485|missense_variant|911|E/V|MODERATE|TCHH|deleterious_low_confidence(0)|possibly_damaging(0.895);	2	0.00112994
chr1	98940414	G	A	missense_variant|TCHH|p.Asp1548Asn	0.02	chr1:152108149|missense_variant|1690|D/N|MODERATE|TCHH|deleterious_low_confidence(0.02)|possibly_damaging(0.948);	52	0.0293785
chr1	98940837	C	T	missense_variant|TCHH|p.Arg1689Trp	0	chr1:152107681|missense_variant|1846|R/W|MODERATE|TCHH|deleterious_low_confidence(0)|probably_damaging(0.999);	495	0.279661
chr1	100078030	C	T	missense_variant|BNIPL|p.Gly176Arg	0	chr1:151043072|missense_variant|102|G/R|MODERATE|BNIPL|deleterious(0)|probably_damaging(0.988);chr1:151043072|missense_variant|184|G/R|MODERATE|BNIPL|deleterious(0)|probably_damaging(0.988);chr1:151043072|missense_variant|102|G/R|MODERATE|BNIPL|deleterious(0)|probably_damaging(0.988);	11	0.00621469
chr1	100132116	G	T	missense_variant|ANXA9|p.Thr303Asn	0.04	chr1:150994632|missense_variant|303|T/N|MODERATE|ANXA9|deleterious(0.02)|possibly_damaging(0.863);chr1:150994632|missense_variant|303|T/N|MODERATE|ANXA9|deleterious(0.02)|possibly_damaging(0.863);chr1:150994632|missense_variant|303|T/N|MODERATE|ANXA9|deleterious(0.02)|possibly_damaging(0.863);chr1:150994632|missense_variant|303|T/N|MODERATE|ANXA9|deleterious(0.02)|possibly_damaging(0.863);chr1:15…	1550	0.875706
chr1	100132140	C	A	missense_variant|ANXA9|p.Arg295Leu	0.01	chr1:150994608|missense_variant|295|R/L|MODERATE|ANXA9|deleterious(0)|probably_damaging(1);chr1:150994608|missense_variant|295|R/L|MODERATE|ANXA9|deleterious(0)|probably_damaging(1);chr1:150994608|missense_variant|295|R/L|MODERATE|ANXA9|deleterious(0)|probably_damaging(1);chr1:150994608|missense_variant|295|R/L|MODERATE|ANXA9|deleterious(0)|probably_damaging(1);chr1:150994608|missense_variant|295…	6	0.00338983
chr1	100637494	G	A	missense_variant|ECM1|p.Arg155Trp;missense_variant|ECM1|p.Arg122Trp	0	chr1:150510953|missense_variant|182|R/W|MODERATE|ECM1|deleterious(0)|probably_damaging(0.998);chr1:150510953|missense_variant|155|R/W|MODERATE|ECM1|deleterious(0)|probably_damaging(1);chr1:150510953|missense_variant|155|R/W|MODERATE|ECM1|deleterious(0.01)|probably_damaging(0.999);	82	0.0463277
chr1	100649729	G	A	missense_variant|TARS2|p.Arg491Cys	0.04	chr1:150498966|missense_variant|409|R/C|MODERATE|TARS2|deleterious(0)|probably_damaging(0.987);chr1:150498966|missense_variant|361|R/C|MODERATE|TARS2|deleterious(0)|probably_damaging(1);chr1:150498966|missense_variant|491|R/C|MODERATE|TARS2|deleterious(0)|probably_damaging(0.999);	9	0.00508475
chr1	100661677	T	A	missense_variant|TARS2|p.Lys62Met	0.01	chr1:150487976|missense_variant|62|K/M|MODERATE|TARS2|deleterious(0)|probably_damaging(0.998);chr1:150487976|missense_variant|62|K/M|MODERATE|TARS2|deleterious(0)|possibly_damaging(0.832);chr1:150487976|missense_variant|62|K/M|MODERATE|TARS2|deleterious(0.01)|probably_damaging(0.991);	84	0.0474576
chr1	100891745	G	T	missense_variant|CA14|p.Phe280Leu;missense_variant|CA14|p.Phe266Leu;missense_variant|CA14|p.Phe278Leu;missense_variant|CA14|p.Phe278Leu;missense_variant|CA14|p.Phe246Leu	0	chr1:150263412|missense_variant|278|F/L|MODERATE|CA14|deleterious(0)|probably_damaging(0.997);	29	0.0163842
chr1	100892612	T	C	missense_variant|CA14|p.Tyr146Cys;missense_variant|CA14|p.Tyr132Cys;missense_variant|CA14|p.Tyr144Cys;missense_variant|CA14|p.Tyr144Cys	0	chr1:150262556|missense_variant|144|Y/C|MODERATE|CA14|deleterious(0)|probably_damaging(1);	91	0.0514124
chr1	103376515	C	T	missense_variant|ITGA10|p.Arg521Cys;missense_variant|ITGA10|p.Arg584Cys	0	chr1:145901161|missense_variant|390|R/C|MODERATE|ITGA10|deleterious(0)|probably_damaging(1);chr1:145901161|missense_variant|378|R/C|MODERATE|ITGA10|deleterious(0)|probably_damaging(1);chr1:145901161|missense_variant|521|R/C|MODERATE|ITGA10|deleterious(0)|probably_damaging(1);	19	0.0107345
chr1	103431687	G	A	missense_variant|NUDT17|p.Arg13Cys;missense_variant|NUDT17|p.Arg13Cys	0.01	chr1:145845677|missense_variant|13|R/C|MODERATE|NUDT17|deleterious(0)|probably_damaging(0.994);	166	0.0937853
chr1	104491075	C	G	missense_variant|REG4|p.Pro158Arg	0	chr1:119794622|missense_variant|158|P/R|MODERATE|REG4|deleterious(0)|probably_damaging(0.996);chr1:119794622|missense_variant|158|P/R|MODERATE|REG4|deleterious(0)|probably_damaging(0.996);	46	0.0259887
chr1	106170759	T	C	missense_variant|SPAG17|p.Met426Thr	0	chr1:118091688|missense_variant|426|M/T|MODERATE|SPAG17|deleterious(0.04)|possibly_damaging(0.927);chr1:118091688|missense_variant|426|M/T|MODERATE|SPAG17|deleterious(0.04)|possibly_damaging(0.927);	54	0.0305085
chr1	107312819	G	T	missense_variant|PTGFRN|p.Ser239Tyr;missense_variant|PTGFRN|p.Ser239Tyr	0	chr1:116944976|missense_variant|239|S/Y|MODERATE|PTGFRN|deleterious(0.03)|probably_damaging(0.987);	23	0.0129944
chr1	108128848	G	A	missense_variant|MAB21L3|p.Arg105Trp	0.02	chr1:116124189|missense_variant|105|R/W|MODERATE|MAB21L3|deleterious(0)|probably_damaging(0.998);chr1:116124189|missense_variant|105|R/W|MODERATE|MAB21L3|deleterious(0)|probably_damaging(0.998);	3	0.00169492
chr1	108511922	C	T	missense_variant|CASQ2|p.Arg206Cys;missense_variant|CASQ2|p.Arg160Cys	0.01	chr1:115738278|missense_variant|160|R/C|MODERATE|CASQ2|deleterious(0.01)|probably_damaging(1);	5	0.00282486
chr1	110403618	C	T	missense_variant|PTPN22|p.Ser771Phe;missense_variant|PTPN22|p.Ser737Phe;missense_variant|PTPN22|p.Ser765Phe;missense_variant|PTPN22|p.Ser707Phe	0	chr1:113819642|missense_variant|737|S/F|MODERATE|PTPN22|deleterious(0.01)|probably_damaging(1);chr1:113819642|missense_variant|741|S/F|MODERATE|PTPN22|deleterious(0.01)|probably_damaging(1);chr1:113819642|missense_variant|710|S/F|MODERATE|PTPN22|deleterious(0.01)|probably_damaging(0.999);chr1:113819642|missense_variant|765|S/F|MODERATE|PTPN22|deleterious(0.01)|probably_damaging(0.988);	26	0.0146893
chr1	112855111	A	T	missense_variant|CHIA|p.Phe460Ile	0.01	chr1:111320431|missense_variant|305|F/I|MODERATE|CHIA|deleterious(0)|probably_damaging(0.96);chr1:111320431|missense_variant|358|F/I|MODERATE|CHIA|deleterious(0)|probably_damaging(0.96);chr1:111320431|missense_variant|305|F/I|MODERATE|CHIA|deleterious(0)|probably_damaging(0.96);chr1:111320431|missense_variant|358|F/I|MODERATE|CHIA|deleterious(0)|probably_damaging(0.96);chr1:111320431|missense_var…	1067	0.602825
chr1	112857006	C	T	missense_variant|CHIA|p.Gly254Arg	0	chr1:111318523|missense_variant|93|G/R|MODERATE|CHIA|deleterious(0)|probably_damaging(1);chr1:111318523|missense_variant|146|G/R|MODERATE|CHIA|deleterious(0)|probably_damaging(1);chr1:111318523|missense_variant|93|G/R|MODERATE|CHIA|deleterious(0)|probably_damaging(1);chr1:111318523|missense_variant|146|G/R|MODERATE|CHIA|deleterious(0)|probably_damaging(1);chr1:111318523|missense_variant|93|G/R|MO…	57	0.0322034
chr1	112857419	G	C	missense_variant|CHIA|p.Asp213Glu	0	chr1:111318019|missense_variant|52|D/E|MODERATE|CHIA|deleterious(0)|probably_damaging(0.977);chr1:111318019|missense_variant|105|D/E|MODERATE|CHIA|deleterious(0)|probably_damaging(0.977);chr1:111318019|missense_variant|52|D/E|MODERATE|CHIA|deleterious(0)|probably_damaging(0.977);chr1:111318019|missense_variant|105|D/E|MODERATE|CHIA|deleterious(0)|probably_damaging(0.977);chr1:111318019|missense_v…	110	0.0621469
chr1	114090704	C	G	missense_variant|STRIP1|p.Gln254His;missense_variant|STRIP1|p.Gln247His;missense_variant|STRIP1|p.Gln277His	0.01	chr1:110041623|missense_variant|151|Q/H|MODERATE|STRIP1|deleterious(0.05)|possibly_damaging(0.658);chr1:110041623|missense_variant|246|Q/H|MODERATE|STRIP1|deleterious(0.04)|possibly_damaging(0.658);	23	0.0129944
chr1	114469182	G	A	missense_variant|GSTM2|p.Arg82Cys;missense_variant|GSTM2|p.Arg82Cys;missense_variant|GSTM2|p.Arg82Cys;missense_variant|GSTM2|p.Arg108Cys;missense_variant|GSTM2|p.Arg82Cys	0	chr1:109669356|missense_variant|82|R/C|MODERATE|GSTM2|deleterious(0.01)|probably_damaging(0.994);chr1:109669356|missense_variant|82|R/C|MODERATE|GSTM2|deleterious(0.01)|probably_damaging(1);	19	0.0107345
chr1	114860943	T	C	missense_variant|PSRC1|p.Phe18Ser;missense_variant|PSRC1|p.Phe12Ser	0	chr1:109282542|missense_variant|18|F/S|MODERATE|PSRC1|deleterious_low_confidence(0)|probably_damaging(0.961);chr1:109282542|missense_variant|18|F/S|MODERATE|PSRC1|deleterious(0)|possibly_damaging(0.835);chr1:109282542|missense_variant|18|F/S|MODERATE|PSRC1|deleterious(0)|probably_damaging(0.998);chr1:109282542|missense_variant|18|F/S|MODERATE|PSRC1|deleterious(0)|probably_damaging(0.998);chr1:109…	68	0.0384181
chr1	114891038	C	T	missense_variant|CELSR2|p.Val897Met	0.01	chr1:109252759|missense_variant|894|V/M|MODERATE|CELSR2|deleterious(0.03)|probably_damaging(0.989);	103	0.0581921
chr1	115362528	C	T	missense_variant|GPSM2|p.Gly96Glu;missense_variant|GPSM2|p.Gly77Glu	0	chr1:108897500|missense_variant|96|G/E|MODERATE|GPSM2|deleterious(0.04)|probably_damaging(0.998);chr1:108897500|missense_variant|96|G/E|MODERATE|GPSM2|deleterious(0.04)|probably_damaging(0.998);chr1:108897500|missense_variant|96|G/E|MODERATE|GPSM2|deleterious(0.04)|probably_damaging(0.998);chr1:108897500|missense_variant|96|G/E|MODERATE|GPSM2|deleterious(0.04)|probably_damaging(0.998);chr1:108897…	17	0.00960452
chr1	115407917	A	C	missense_variant|AKNAD1|p.Lys183Thr	0	chr1:108852117|missense_variant|183|K/T|MODERATE|AKNAD1|deleterious(0.04)|probably_damaging(0.976);	232	0.131073
chr1	115408253	C	A	missense_variant|AKNAD1|p.Pro295His	0	chr1:108851778|missense_variant|296|P/H|MODERATE|AKNAD1|deleterious(0.01)|possibly_damaging(0.947);	120	0.0677966
chr1	115417133	G	C	missense_variant|AKNAD1|p.Glu417Asp;missense_variant|AKNAD1|p.Glu125Asp	0	chr1:108843259|missense_variant|418|E/D|MODERATE|AKNAD1|deleterious(0.02)|probably_damaging(0.99);	81	0.0457627
chr1	115443426	A	T	missense_variant|AKNAD1|p.His798Leu	0	chr1:108816280|missense_variant|801|H/L|MODERATE|AKNAD1|deleterious(0)|possibly_damaging(0.842);	51	0.0288136
chr1	115443503	G	A	missense_variant|AKNAD1|p.Ala824Thr	0	chr1:108816203|missense_variant|827|A/T|MODERATE|AKNAD1|deleterious(0.03)|probably_damaging(0.986);	215	0.121469
chr1	120681849	C	G	missense_variant|RNPC3|p.Asp509His	0	chr1:103551751|missense_variant|509|D/H|MODERATE|RNPC3|deleterious(0)|probably_damaging(1);	74	0.0418079
chr1	123884130	G	C	missense_variant|RTCA|p.Pro46Ala;missense_variant|RTCA|p.Pro46Ala	0.02	chr1:100266614|missense_variant|46|P/A|MODERATE|RTCA|deleterious(0.01)|probably_damaging(0.999);chr1:100266614|missense_variant|46|P/A|MODERATE|RTCA|deleterious(0.01)|probably_damaging(0.993);	29	0.0163842
chr1	126839999	C	T	missense_variant|DPYD|p.Arg701Cys;missense_variant|DPYD|p.Arg692Cys;missense_variant|DPYD|p.Arg641Cys;missense_variant|DPYD|p.Arg635Cys;missense_variant|DPYD|p.Arg656Cys;missense_variant|DPYD|p.Arg669Cys;missense_variant|DPYD|p.Arg616Cys;missense_variant|DPYD|p.Arg641Cys	0.04	chr1:97306282|missense_variant|692|R/W|MODERATE|DPYD|deleterious(0.04)|probably_damaging(1);	34	0.019209
chr1	129998222	G	T	missense_variant|ARHGAP29|p.Ser1105Ile;missense_variant|ARHGAP29|p.Ser1016Ile	0.01	chr1:94174356|missense_variant|1100|S/I|MODERATE|ARHGAP29|deleterious(0.01)|possibly_damaging(0.71);chr1:94174356|missense_variant|1036|S/I|MODERATE|ARHGAP29|deleterious(0.01)|possibly_damaging(0.682);chr1:94174356|missense_variant|1091|S/I|MODERATE|ARHGAP29|deleterious(0.01)|possibly_damaging(0.682);chr1:94174356|missense_variant|1036|S/I|MODERATE|ARHGAP29|deleterious(0.01)|possibly_damaging(0.6…	944	0.533333
chr1	130086888	G	T	missense_variant|ABCA4|p.Asp501Tyr	0.01	chr1:94077743|missense_variant|501|D/Y|MODERATE|ABCA4|deleterious(0)|possibly_damaging(0.939);	52	0.0293785
chr1	130568809	A	G	missense_variant|BCAR3|p.Ile576Met;missense_variant|BCAR3|p.Ile564Met;missense_variant|BCAR3|p.Ile564Met	0.02	chr1:93576118|missense_variant|566|I/M|MODERATE|BCAR3|deleterious(0)|probably_damaging(1);chr1:93576118|missense_variant|566|I/M|MODERATE|BCAR3|deleterious(0)|probably_damaging(1);chr1:93576118|missense_variant|475|I/M|MODERATE|BCAR3|deleterious(0)|probably_damaging(0.995);chr1:93576118|missense_variant|242|I/M|MODERATE|BCAR3|deleterious(0)|probably_damaging(1);chr1:93576118|missense_variant|566|…	439	0.248023
chr1	132824164	C	T	missense_variant|HFM1|p.Thr710Met	0.04	chr1:91350815|missense_variant|710|T/M|MODERATE|HFM1|deleterious(0)|probably_damaging(1);chr1:91350815|missense_variant|710|T/M|MODERATE|HFM1|deleterious(0)|probably_damaging(1);chr1:91350815|missense_variant|710|T/M|MODERATE|HFM1|deleterious(0)|probably_damaging(1);chr1:91350815|missense_variant|710|T/M|MODERATE|HFM1|deleterious(0)|probably_damaging(1);chr1:91350815|missense_variant|710|T/M|MODE…	60	0.0338983
chr1	133186545	C	T	missense_variant|HFM1|p.Pro1375Ser	0	chr1:91262356|missense_variant|1375|P/S|MODERATE|HFM1|deleterious_low_confidence(0.01)|probably_damaging(0.994);chr1:91262356|missense_variant|1375|P/S|MODERATE|HFM1|deleterious_low_confidence(0.01)|probably_damaging(0.994);chr1:91262356|missense_variant|1375|P/S|MODERATE|HFM1|deleterious_low_confidence(0.01)|probably_damaging(0.994);chr1:91262356|missense_variant|1375|P/S|MODERATE|HFM1|deleterio…	124	0.0700565
chr1	135251113	C	T	missense_variant|GBP7|p.Arg69Cys	0	chr1:89171794|missense_variant|48|R/C|MODERATE|GBP7|deleterious(0.01)|probably_damaging(0.999);	16	0.00903955
chr1	135276245	C	T	missense_variant|GBP7|p.Thr369Met;missense_variant|GBP7|p.Thr348Met	0	chr1:89149401|missense_variant|348|T/I|MODERATE|GBP7|deleterious(0)|possibly_damaging(0.873);	43	0.0242938
chr1	135424767	T	C	missense_variant|GBP3|p.Leu245Pro;missense_variant|GBP3|p.Leu245Pro;missense_variant|GBP3|p.Leu245Pro;missense_variant|GBP3|p.Leu245Pro;missense_variant|GBP3|p.Leu245Pro	0.01	chr1:89013319|missense_variant|166|L/P|MODERATE|GBP3|deleterious(0)|probably_damaging(1);chr1:89013319|missense_variant|111|L/P|MODERATE|GBP3|deleterious(0)|probably_damaging(1);chr1:89013319|missense_variant|245|L/P|MODERATE|GBP3|deleterious(0)|probably_damaging(1);chr1:89013319|missense_variant|245|L/P|MODERATE|GBP3|deleterious(0)|probably_damaging(1);chr1:89013319|missense_variant|166|L/P|MODE…	46	0.0259887
chr1	145777364	C	G	missense_variant|IFI44L|p.Val319Leu;missense_variant|IFI44L|p.Val319Leu;missense_variant|IFI44L|p.Val319Leu	0	chr1:78637110|missense_variant|319|V/L|MODERATE|IFI44L|deleterious(0.01)|possibly_damaging(0.873);chr1:78637110|missense_variant|61|V/L|MODERATE|IFI44L|deleterious(0)|possibly_damaging(0.873);chr1:78637110|missense_variant|61|V/L|MODERATE|IFI44L|deleterious(0)|possibly_damaging(0.873);chr1:78637110|missense_variant|61|V/L|MODERATE|IFI44L|deleterious(0)|possibly_damaging(0.873);chr1:78637110|misse…	71	0.040113
chr1	149756593	T	G	missense_variant|ERICH3|p.Val82Gly;missense_variant|ERICH3|p.Val82Gly;missense_variant|ERICH3|p.Val77Gly	0	chr1:74646680|missense_variant|77|V/G|MODERATE|ERICH3|deleterious(0)|probably_damaging(1);	18	0.0101695
chr1	149761834	G	A	missense_variant&splice_region_variant|ERICH3|p.Gly111Arg;missense_variant&splice_region_variant|ERICH3|p.Gly111Arg;missense_variant&splice_region_variant|ERICH3|p.Gly106Arg	0	chr1:74641459|missense_variant,splice_region_variant|106|G/R|MODERATE|ERICH3|deleterious(0)|probably_damaging(1);	162	0.0915254
chr1	149839201	G	T	missense_variant|ERICH3|p.Gly1508Val;missense_variant|ERICH3|p.Gly1466Val;missense_variant|ERICH3|p.Gly1503Val	0	chr1:74571304|missense_variant|1469|G/V|MODERATE|ERICH3|deleterious(0)|probably_damaging(0.986);	74	0.0418079
chr1	149931731	G	C	missense_variant|LRRC53|p.Trp316Ser	0	chr1:74475768|missense_variant|284|W/S|MODERATE|LRRC53|deleterious(0)|probably_damaging(0.979);chr1:74475768|missense_variant|316|W/S|MODERATE|LRRC53|deleterious(0)|probably_damaging(0.979);	232	0.131073
chr1	149932136	A	G	missense_variant|LRRC53|p.Lys451Arg	0	chr1:74475363|missense_variant|419|K/R|MODERATE|LRRC53|deleterious(0.01)|possibly_damaging(0.921);chr1:74475363|missense_variant|451|K/R|MODERATE|LRRC53|deleterious(0.01)|possibly_damaging(0.921);	47	0.0265537
chr1	149935763	G	C	missense_variant|LRRC53|p.Arg649Thr	0	chr1:74471673|missense_variant|618|R/T|MODERATE|LRRC53|deleterious(0.01)|possibly_damaging(0.533);chr1:74471673|missense_variant|650|R/T|MODERATE|LRRC53|deleterious(0.01)|possibly_damaging(0.533);	105	0.059322
chr1	149936300	A	G	missense_variant|LRRC53|p.Tyr828Cys	0	chr1:74471142|missense_variant|795|Y/C|MODERATE|LRRC53|deleterious(0.03)|possibly_damaging(0.89);chr1:74471142|missense_variant|827|Y/C|MODERATE|LRRC53|deleterious(0.03)|possibly_damaging(0.89);	77	0.0435028
chr1	149936644	A	C	missense_variant|LRRC53|p.Lys943Gln	0	chr1:74470798|missense_variant|910|K/Q|MODERATE|LRRC53|deleterious(0)|possibly_damaging(0.719);chr1:74470798|missense_variant|942|K/Q|MODERATE|LRRC53|deleterious(0)|possibly_damaging(0.719);	46	0.0259887
chr1	149937427	A	G	missense_variant|LRRC53|p.Lys1204Glu	0	chr1:74470015|missense_variant|1171|K/E|MODERATE|LRRC53|deleterious_low_confidence(0)|possibly_damaging(0.528);chr1:74470015|missense_variant|1203|K/E|MODERATE|LRRC53|deleterious_low_confidence(0)|possibly_damaging(0.528);	74	0.0418079
chr1	149937517	C	G	missense_variant|LRRC53|p.Pro1234Ala	0	chr1:74469925|missense_variant|1201|P/A|MODERATE|LRRC53|deleterious(0)|possibly_damaging(0.845);chr1:74469925|missense_variant|1233|P/A|MODERATE|LRRC53|deleterious(0)|possibly_damaging(0.845);	299	0.168927
chr1	154243811	C	T	missense_variant|LRRC40|p.Pro28Leu;missense_variant|LRRC40|p.Pro28Leu;missense_variant|LRRC40|p.Pro28Leu	0	chr1:70205458|missense_variant|28|P/L|MODERATE|LRRC40|deleterious(0.04)|probably_damaging(0.999);	42	0.0237288
chr1	154266264	C	T	missense_variant|LRRC40|p.Leu173Phe;missense_variant|LRRC40|p.Leu173Phe;missense_variant|LRRC40|p.Leu173Phe	0.04	chr1:70184805|missense_variant|173|L/F|MODERATE|LRRC40|deleterious(0)|probably_damaging(1);	64	0.0361582
chr1	155942861	C	A	missense_variant|DEPDC1|p.Ser575Tyr	0.01	chr1:68482084|missense_variant|575|S/Y|MODERATE|DEPDC1|deleterious(0.01)|probably_damaging(0.989);	123	0.0694915
chr1	155948212	T	C	missense_variant|DEPDC1|p.Phe789Ser	0	chr1:68477002|missense_variant|789|F/S|MODERATE|DEPDC1|deleterious(0)|possibly_damaging(0.929);chr1:68477002|missense_variant|505|F/S|MODERATE|DEPDC1|deleterious(0)|probably_damaging(0.958);	74	0.0418079
chr1	157644869	G	A	missense_variant|DYNLT5|p.Arg117Trp;missense_variant|DYNLT5|p.Arg117Trp	0.01	chr1:66777263|stop_gained|117|Q/*|HIGH|DYNLT5|-|-;chr1:66777263|stop_gained|100|Q/*|HIGH|DYNLT5|-|-;	8	0.00451977
chr1	159654938	C	A	missense_variant|RAVER2|p.Gln138His;missense_variant|RAVER2|p.Gln138His	0	chr1:64777714|missense_variant|136|Q/H|MODERATE|RAVER2|deleterious(0)|probably_damaging(1);chr1:64777714|missense_variant|136|Q/H|MODERATE|RAVER2|deleterious(0)|probably_damaging(1);	254	0.143503
chr1	159970061	C	G	missense_variant|CACHD1|p.Trp29Cys;missense_variant|CACHD1|p.Trp29Cys;missense_variant|CACHD1|p.Trp29Cys	0	chr1:64470831|missense_variant|29|W/C|MODERATE|CACHD1|deleterious_low_confidence(0.04)|unknown(0);	29	0.0163842
chr1	160846681	G	A	missense_variant|PGM1|p.Arg41Trp;missense_variant|PGM1|p.Arg41Trp	0	chr1:63623581|missense_variant|41|R/W|MODERATE|PGM1|deleterious(0)|probably_damaging(1);	25	0.0141243
chr1	162194317	G	A	missense_variant|KANK4|p.Gly938Ser	0	chr1:62247537|missense_variant|312|G/S|MODERATE|KANK4|deleterious(0.01)|probably_damaging(1);chr1:62247537|missense_variant|940|G/S|MODERATE|KANK4|deleterious(0.02)|probably_damaging(1);chr1:62247537|missense_variant|312|G/S|MODERATE|KANK4|deleterious(0.01)|probably_damaging(1);chr1:62247537|missense_variant|296|G/S|MODERATE|KANK4|deleterious(0.01)|probably_damaging(1);chr1:62247537|missense_vari…	59	0.0333333
chr1	162368186	A	C	missense_variant|PATJ|p.Leu1421Arg;missense_variant|PATJ|p.Leu201Arg;missense_variant|PATJ|p.Leu205Arg;missense_variant|PATJ|p.Leu1421Arg;missense_variant|PATJ|p.Leu1421Arg;missense_variant|PATJ|p.Leu1351Arg;missense_variant|PATJ|p.Leu1348Arg;missense_variant|PATJ|p.Leu1381Arg;missense_variant|PATJ|p.Leu1421Arg	0.04	chr1:62084533|missense_variant|1421|L/R|MODERATE|PATJ|deleterious(0)|possibly_damaging(0.848);chr1:62084533|missense_variant|1421|L/R|MODERATE|PATJ|deleterious(0)|probably_damaging(0.999);	102	0.0576271
chr1	162686015	C	G	missense_variant|PATJ|p.Lys26Asn;missense_variant|PATJ|p.Lys26Asn;missense_variant|PATJ|p.Lys26Asn;missense_variant|PATJ|p.Lys26Asn;missense_variant|PATJ|p.Lys26Asn;missense_variant|PATJ|p.Lys26Asn;missense_variant|PATJ|p.Lys26Asn;missense_variant|PATJ|p.Lys26Asn	0.03	chr1:61763068|missense_variant|26|K/N|MODERATE|PATJ|deleterious(0)|probably_damaging(0.998);chr1:61763068|missense_variant|26|K/N|MODERATE|PATJ|deleterious(0)|probably_damaging(0.982);	45	0.0254237
chr1	164516804	T	C	missense_variant|CYP2J2|p.Ile91Thr;missense_variant|CYP2J2|p.Ile91Thr;missense_variant|CYP2J2|p.Ile91Thr	0.01	chr1:59916039|missense_variant|91|I/T|MODERATE|CYP2J2|deleterious(0)|possibly_damaging(0.578);	28	0.0158192
chr1	167549646	G	A	missense_variant|C8A|p.Arg95Trp	0.02	chr1:56875060|stop_gained|95|Q/*|HIGH|C8A|-|-;chr1:56875060|stop_gained|95|Q/*|HIGH|C8A|-|-;chr1:56875060|stop_gained|95|Q/*|HIGH|C8A|-|-;	41	0.0231638
chr1	167633694	C	T	missense_variant|FYB2|p.Leu296Phe;missense_variant|FYB2|p.Leu296Phe	0	chr1:56789024|missense_variant|290|L/F|MODERATE|FYB2|deleterious(0)|probably_damaging(0.999);	18	0.0101695
chr1	169345845	C	G	missense_variant|USP24|p.Leu1929Val;missense_variant|USP24|p.Leu1909Val;missense_variant|USP24|p.Leu1909Val;missense_variant|USP24|p.Leu1909Val;missense_variant|USP24|p.Leu1704Val	0	chr1:55097160|missense_variant|1910|L/V|MODERATE|USP24|deleterious(0)|probably_damaging(1);	11	0.00621469
chr1	169430559	C	T	missense_variant|BSND|p.Arg100Lys	0	chr1:55007023|missense_variant|100|R/K|MODERATE|BSND|deleterious(0.05)|probably_damaging(0.99);	38	0.0214689
chr1	169452311	C	T	missense_variant|TMEM61|p.Val29Ile;missense_variant|TMEM61|p.Val29Ile	0	chr1:54986166|missense_variant|29|V/M|MODERATE|TMEM61|deleterious(0)|probably_damaging(0.998);chr1:54986166|missense_variant|29|V/M|MODERATE|TMEM61|deleterious(0)|probably_damaging(0.998);	215	0.121469
chr1	169807727	T	A	missense_variant|FAM151A|p.Leu360His;missense_variant|FAM151A|p.Leu309His	0.01	chr1:54610417|missense_variant|360|L/H|MODERATE|FAM151A|deleterious(0.01)|probably_damaging(0.996);	206	0.116384
chr1	170203690	G	A	missense_variant|MRPL37|p.Ser240Phe;missense_variant|MRPL37|p.Ser241Phe;missense_variant|MRPL37|p.Ser241Phe	0	chr1:54210021|missense_variant|241|S/F|MODERATE|MRPL37|deleterious(0)|probably_damaging(0.985);chr1:54210021|missense_variant|241|S/F|MODERATE|MRPL37|deleterious(0)|possibly_damaging(0.939);	262	0.148023
chr1	170241654	T	C	missense_variant|CYB5RL|p.Trp257Arg;missense_variant|CYB5RL|p.Trp231Arg	0	chr1:54174798|missense_variant|257|W/R|MODERATE|CYB5RL|deleterious(0.02)|probably_damaging(0.987);chr1:54174798|missense_variant|178|W/R|MODERATE|CYB5RL|deleterious(0.02)|possibly_damaging(0.899);chr1:54174798|missense_variant|109|W/R|MODERATE|CYB5RL|deleterious(0.02)|probably_damaging(0.987);	76	0.0429379
chr1	170386963	C	A	missense_variant|TMEM59|p.Leu359Ile;missense_variant|TMEM59|p.Leu181Ile;missense_variant|TMEM59|p.Leu181Ile;missense_variant|TMEM59|p.Leu181Ile	0	chr1:54032188|missense_variant|313|L/I|MODERATE|TMEM59|deleterious(0.03)|probably_damaging(0.993);chr1:54032188|missense_variant|182|L/I|MODERATE|TMEM59|deleterious(0.04)|probably_damaging(0.993);chr1:54032188|missense_variant|246|L/I|MODERATE|TMEM59|deleterious(0.02)|probably_damaging(0.994);chr1:54032188|missense_variant|181|L/I|MODERATE|TMEM59|deleterious(0.04)|possibly_damaging(0.578);chr1:54…	46	0.0259887
chr1	170410678	G	A	missense_variant|LDLRAD1|p.Cys178Tyr	0	chr1:54009067|missense_variant|178|C/Y|MODERATE|LDLRAD1|deleterious(0)|probably_damaging(1);chr1:54009067|missense_variant|139|C/Y|MODERATE|LDLRAD1|deleterious(0)|probably_damaging(0.998);chr1:54009067|missense_variant|135|C/Y|MODERATE|LDLRAD1|deleterious(0)|probably_damaging(0.997);chr1:54009067|missense_variant|89|C/Y|MODERATE|LDLRAD1|deleterious(0)|probably_damaging(1);	82	0.0463277
chr1	170410692	A	G	missense_variant|LDLRAD1|p.Arg183Gly	0	chr1:54009053|missense_variant|183|R/G|MODERATE|LDLRAD1|deleterious(0)|probably_damaging(0.999);chr1:54009053|missense_variant|144|R/G|MODERATE|LDLRAD1|deleterious(0)|probably_damaging(0.991);chr1:54009053|missense_variant|140|R/G|MODERATE|LDLRAD1|deleterious(0)|probably_damaging(0.965);chr1:54009053|missense_variant|94|R/G|MODERATE|LDLRAD1|deleterious(0)|possibly_damaging(0.852);	296	0.167232
chr1	170616560	C	T	missense_variant|NDC1|p.Thr389Met;missense_variant|NDC1|p.Thr373Met	0.03	chr1:53800749|missense_variant|349|T/M|MODERATE|NDC1|deleterious(0.04)|possibly_damaging(0.84);chr1:53800749|missense_variant|389|T/M|MODERATE|NDC1|deleterious(0.01)|possibly_damaging(0.936);	62	0.0350282
chr1	171197439	T	C	missense_variant|CZIB|p.Ile214Thr;missense_variant|CZIB|p.Ile130Thr	0.04	chr1:53216007|missense_variant|111|I/T|MODERATE|CZIB|deleterious(0.01)|possibly_damaging(0.659);chr1:53216007|missense_variant|83|I/T|MODERATE|CZIB|deleterious(0)|possibly_damaging(0.659);chr1:53216007|missense_variant|130|I/T|MODERATE|CZIB|deleterious(0.01)|probably_damaging(0.987);	12	0.00677966
chr1	171321563	G	A	missense_variant|SLC1A7|p.Gly390Glu	0	chr1:53090846|missense_variant|390|G/E|MODERATE|SLC1A7|deleterious(0.02)|probably_damaging(0.999);	7	0.0039548
chr1	171525633	G	A	missense_variant|ECHDC2|p.Arg165Gln	0.01	chr1:52905054|missense_variant|165|R/Q|MODERATE|ECHDC2|deleterious(0.01)|probably_damaging(1);chr1:52905054|missense_variant|134|R/Q|MODERATE|ECHDC2|deleterious(0.02)|probably_damaging(0.998);chr1:52905054|missense_variant|88|R/Q|MODERATE|ECHDC2|deleterious(0.01)|probably_damaging(1);chr1:52905054|missense_variant|134|R/Q|MODERATE|ECHDC2|deleterious(0.02)|probably_damaging(1);chr1:52905054|missen…	56	0.0316384
chr1	172087472	A	G	missense_variant|ORC1|p.Asn845Ser	0.04	chr1:52373224|missense_variant|848|N/S|MODERATE|ORC1|deleterious(0)|probably_damaging(1);chr1:52373224|missense_variant|843|N/S|MODERATE|ORC1|deleterious(0)|probably_damaging(1);chr1:52373224|missense_variant|848|N/S|MODERATE|ORC1|deleterious(0)|probably_damaging(1);chr1:52373224|missense_variant|848|N/S|MODERATE|ORC1|deleterious(0)|probably_damaging(1);	9	0.00508475
chr1	172230028	C	T	missense_variant|ZFYVE9|p.Cys88Tyr;missense_variant|ZFYVE9|p.Cys88Tyr	0	chr1:52237680|missense_variant|88|C/Y|MODERATE|ZFYVE9|deleterious_low_confidence(0)|possibly_damaging(0.679);chr1:52237680|missense_variant|88|C/Y|MODERATE|ZFYVE9|deleterious_low_confidence(0)|possibly_damaging(0.785);chr1:52237680|missense_variant|88|C/Y|MODERATE|ZFYVE9|deleterious_low_confidence(0)|possibly_damaging(0.679);chr1:52237680|missense_variant|88|C/Y|MODERATE|ZFYVE9|deleterious_low_co…	39	0.0220339
chr1	177223341	C	A	missense_variant|STIL|p.Pro662Thr;missense_variant|STIL|p.Pro662Thr;missense_variant|STIL|p.Pro633Thr;missense_variant|STIL|p.Pro649Thr	0	chr1:47280474|missense_variant|662|P/T|MODERATE|STIL|deleterious(0)|probably_damaging(1);chr1:47280474|missense_variant|662|P/T|MODERATE|STIL|deleterious(0)|probably_damaging(1);chr1:47280474|missense_variant|662|P/T|MODERATE|STIL|deleterious(0)|probably_damaging(1);chr1:47280474|missense_variant|615|P/T|MODERATE|STIL|deleterious(0)|probably_damaging(1);chr1:47280474|missense_variant|615|P/T|MODE…	40	0.0225989
chr1	177609988	G	T	missense_variant|CYP4B1|p.Pro143His	0	chr1:46812556|missense_variant|143|P/H|MODERATE|CYP4B1|deleterious(0)|probably_damaging(1);chr1:46812556|missense_variant|143|P/H|MODERATE|CYP4B1|deleterious(0)|probably_damaging(1);chr1:46812556|missense_variant|128|P/H|MODERATE|CYP4B1|deleterious(0)|probably_damaging(1);	319	0.180226
chr1	178196977	G	A	missense_variant|POMGNT1|p.Arg263His;missense_variant|POMGNT1|p.Arg263His;missense_variant|POMGNT1|p.Arg263His;missense_variant|POMGNT1|p.Arg230His;missense_variant|POMGNT1|p.Arg203His;missense_variant|POMGNT1|p.Arg263His;missense_variant|POMGNT1|p.Arg241His	0.01	chr1:46194365|missense_variant|263|R/H|MODERATE|POMGNT1|-|probably_damaging(0.999);chr1:46194365|missense_variant|241|R/H|MODERATE|POMGNT1|-|probably_damaging(0.999);chr1:46194365|missense_variant|120|R/H|MODERATE|POMGNT1|-|probably_damaging(0.999);chr1:46194365|missense_variant|263|R/H|MODERATE|POMGNT1|-|probably_damaging(0.999);chr1:46194365|missense_variant|263|R/H|MODERATE|POMGNT1|-|probably_…	113	0.0638418
chr1	178201795	A	G	missense_variant|POMGNT1|p.Lys649Glu;missense_variant|POMGNT1|p.Lys621Glu;missense_variant|POMGNT1|p.Lys649Glu;missense_variant|POMGNT1|p.Lys616Glu;missense_variant|POMGNT1|p.Lys589Glu;missense_variant|POMGNT1|p.Lys649Glu;missense_variant|POMGNT1|p.Lys627Glu	0	chr1:46189308|missense_variant|627|K/E|MODERATE|POMGNT1|-|probably_damaging(0.974);chr1:46189308|missense_variant|506|K/E|MODERATE|POMGNT1|-|possibly_damaging(0.956);chr1:46189308|missense_variant|649|K/E|MODERATE|POMGNT1|-|possibly_damaging(0.956);chr1:46189308|missense_variant|627|K/E|MODERATE|POMGNT1|-|probably_damaging(0.974);chr1:46189308|missense_variant|649|K/E|MODERATE|POMGNT1|-|possibly_…	32	0.0180791
chr1	179620575	T	G	missense_variant|DYNLT4|p.Phe93Cys	0	chr1:44806391|missense_variant|93|F/C|MODERATE|DYNLT4|deleterious(0)|probably_damaging(0.992);chr1:44806391|missense_variant|93|F/C|MODERATE|DYNLT4|deleterious(0)|probably_damaging(0.992);chr1:44806391|missense_variant|93|F/C|MODERATE|DYNLT4|deleterious(0)|probably_damaging(0.992);chr1:44806391|missense_variant|93|F/C|MODERATE|DYNLT4|deleterious(0)|probably_damaging(0.992);chr1:44806391|missense_…	444	0.250847
chr1	180844149	G	A	missense_variant|PTPRF|p.Arg1871Cys;missense_variant|PTPRF|p.Arg1785Cys;missense_variant|PTPRF|p.Arg1830Cys;missense_variant|PTPRF|p.Arg1851Cys;missense_variant|PTPRF|p.Arg1862Cys;missense_variant|PTPRF|p.Arg1866Cys;missense_variant|PTPRF|p.Arg1678Cys;missense_variant|PTPRF|p.Arg1775Cys;missense_variant|PTPRF|p.Arg1828Cys	0	chr1:43621155|missense_variant|1582|R/C|MODERATE|PTPRF|deleterious(0)|possibly_damaging(0.846);chr1:43621155|missense_variant|1590|R/C|MODERATE|PTPRF|deleterious(0)|possibly_damaging(0.72);chr1:43621155|missense_variant|1576|R/C|MODERATE|PTPRF|deleterious(0)|possibly_damaging(0.48);chr1:43621155|missense_variant|1556|R/C|MODERATE|PTPRF|deleterious(0)|probably_damaging(1);chr1:43621155|missense_va…	12	0.00677966
chr1	181120660	G	A	missense_variant|MPL|p.Ala418Val	0	chr1:43346879|missense_variant|418|A/V|MODERATE|MPL|deleterious(0.01)|probably_damaging(0.999);	72	0.040678
chr1	181127478	C	T	missense_variant|MPL|p.Arg257His	0	chr1:43340043|missense_variant|257|R/H|MODERATE|MPL|deleterious(0)|probably_damaging(1);	85	0.0480226
chr1	181718316	A	C	missense_variant|ERMAP|p.Asp169Glu;missense_variant|ERMAP|p.Asp103Glu;missense_variant|ERMAP|p.Asp103Glu	0.04	chr1:42830991|missense_variant|103|D/E|MODERATE|ERMAP|deleterious(0)|probably_damaging(0.999);chr1:42830991|missense_variant|103|D/E|MODERATE|ERMAP|deleterious(0)|probably_damaging(0.999);chr1:42830991|missense_variant|103|D/E|MODERATE|ERMAP|deleterious(0)|probably_damaging(0.999);chr1:42830991|missense_variant|103|D/E|MODERATE|ERMAP|deleterious(0)|probably_damaging(0.999);chr1:42830991|missense_…	82	0.0463277
chr1	184061940	G	C	missense_variant|EXO5|p.Ile163Met;missense_variant|EXO5|p.Ile163Met	0.03	chr1:40515033|missense_variant|163|I/M|MODERATE|EXO5|deleterious(0)|possibly_damaging(0.655);chr1:40515033|missense_variant|163|I/M|MODERATE|EXO5|deleterious(0)|possibly_damaging(0.655);chr1:40515033|missense_variant|163|I/M|MODERATE|EXO5|deleterious(0)|possibly_damaging(0.655);chr1:40515033|missense_variant|163|I/M|MODERATE|EXO5|deleterious(0)|possibly_damaging(0.655);chr1:40515033|missense_vari…	156	0.0881356
chr1	184244839	C	A	missense_variant|COL9A2|p.Pro218His;missense_variant|COL9A2|p.Pro150His;missense_variant|COL9A2|p.Pro120His	0.02	chr1:40311684|missense_variant|150|P/H|MODERATE|COL9A2|deleterious(0.02)|probably_damaging(1);	193	0.10904
chr1	184332341	T	G	missense_variant|RLF|p.Asn831His	0.04	chr1:40237193|missense_variant|831|N/H|MODERATE|RLF|deleterious(0.04)|possibly_damaging(0.828);	45	0.0254237
chr1	185149660	C	A	missense_variant|MACF1|p.Ser3912Ile;missense_variant|MACF1|p.Ser3770Ile;missense_variant|MACF1|p.Ser3733Ile;missense_variant|MACF1|p.Ser3775Ile;missense_variant|MACF1|p.Ser3807Ile;missense_variant|MACF1|p.Ser3775Ile;missense_variant|MACF1|p.Ser3882Ile;missense_variant|MACF1|p.Ser3861Ile;missense_variant|MACF1|p.Ser3882Ile;missense_variant|MACF1|p.Ser3773Ile	0.04	chr1:39433100|missense_variant|5837|S/I|MODERATE|MACF1|deleterious(0.02)|probably_damaging(0.998);chr1:39433100|missense_variant|1860|S/I|MODERATE|MACF1|deleterious(0.01)|probably_damaging(0.985);chr1:39433100|missense_variant|3775|S/I|MODERATE|MACF1|deleterious(0.02)|probably_damaging(0.995);	73	0.0412429
chr1	185151982	A	C	missense_variant|MACF1|p.Leu3823Arg;missense_variant|MACF1|p.Leu3681Arg;missense_variant|MACF1|p.Leu3644Arg;missense_variant|MACF1|p.Leu3686Arg;missense_variant|MACF1|p.Leu3718Arg;missense_variant|MACF1|p.Leu3686Arg;missense_variant|MACF1|p.Leu3793Arg;missense_variant|MACF1|p.Leu3772Arg;missense_variant|MACF1|p.Leu3793Arg;missense_variant|MACF1|p.Leu3684Arg	0.01	chr1:39430814|missense_variant|5748|L/R|MODERATE|MACF1|deleterious(0)|probably_damaging(0.999);chr1:39430814|missense_variant|1771|L/R|MODERATE|MACF1|deleterious(0.01)|possibly_damaging(0.935);chr1:39430814|missense_variant|3686|L/R|MODERATE|MACF1|deleterious(0)|probably_damaging(1);	4	0.00225989
chr1	188127346	C	T	missense_variant|MRPS15|p.Thr169Ile	0.03	chr1:36456305|missense_variant|173|T/I|MODERATE|MRPS15|deleterious(0.02)|possibly_damaging(0.751);	19	0.0107345
chr1	188511606	C	T	missense_variant|TEKT2|p.Arg317Gln;missense_variant|TEKT2|p.Arg317Gln	0.02	chr1:36087533|missense_variant|317|R/Q|MODERATE|TEKT2|deleterious(0)|probably_damaging(1);chr1:36087533|missense_variant|317|R/Q|MODERATE|TEKT2|deleterious(0)|probably_damaging(1);chr1:36087533|missense_variant|317|R/Q|MODERATE|TEKT2|deleterious(0)|probably_damaging(1);chr1:36087533|missense_variant|317|R/Q|MODERATE|TEKT2|deleterious(0)|probably_damaging(1);	14	0.0079096
chr1	188847596	G	T	missense_variant|CLSPN|p.Gly364Cys;missense_variant|CLSPN|p.Gly363Cys	0.02	chr1:35760831|missense_variant|364|G/C|MODERATE|CLSPN|deleterious(0)|probably_damaging(0.969);chr1:35760831|missense_variant|364|G/C|MODERATE|CLSPN|deleterious(0.02)|probably_damaging(0.995);chr1:35760831|missense_variant|364|G/C|MODERATE|CLSPN|deleterious(0.02)|probably_damaging(0.994);	681	0.384746
chr1	189032082	G	T	missense_variant|TFAP2E|p.Leu295Met	0.02	chr1:35590027|missense_variant|295|L/M|MODERATE|TFAP2E|deleterious(0)|probably_damaging(1);	21	0.0118644
chr1	189650129	T	C	missense_variant|ZMYM6|p.Cys861Arg;missense_variant|ZMYM6|p.Cys861Arg;missense_variant|ZMYM6|p.Cys754Arg;missense_variant|ZMYM6|p.Cys797Arg	0.03	chr1:34988501|missense_variant|861|C/R|MODERATE|ZMYM6|deleterious_low_confidence(0)|possibly_damaging(0.832);	26	0.0146893
chr1	191000213	C	T	missense_variant|CSMD2|p.Thr1831Met;missense_variant|CSMD2|p.Thr1586Met;missense_variant|CSMD2|p.Thr1770Met	0	chr1:33625059|missense_variant|1831|T/M|MODERATE|CSMD2|deleterious(0)|probably_damaging(0.974);chr1:33625059|missense_variant|1791|T/M|MODERATE|CSMD2|deleterious(0.03)|possibly_damaging(0.868);	100	0.0564972
chr1	191551734	C	A	missense_variant|AZIN2|p.Lys444Asn;missense_variant|AZIN2|p.Lys295Asn	0.02	chr1:33096838|missense_variant|295|K/N|MODERATE|AZIN2|deleterious(0.02)|probably_damaging(0.985);chr1:33096838|missense_variant|200|K/N|MODERATE|AZIN2|deleterious(0.02)|probably_damaging(0.985);chr1:33096838|missense_variant|200|K/N|MODERATE|AZIN2|deleterious(0.02)|probably_damaging(0.985);chr1:33096838|missense_variant|295|K/N|MODERATE|AZIN2|deleterious(0.02)|probably_damaging(0.985);chr1:330968…	33	0.0186441
chr1	192414164	C	A	missense_variant|FAM167B|p.Gln91His	0.03	chr1:32248382|missense_variant|91|Q/H|MODERATE|FAM167B|deleterious(0.02)|probably_damaging(0.971);	93	0.0525424
chr1	192852027	C	A	missense_variant|SPOCD1|p.Pro15His;missense_variant|SPOCD1|p.Pro15His	0	chr1:31815290|missense_variant|15|P/H|MODERATE|SPOCD1|deleterious(0)|probably_damaging(1);chr1:31815290|missense_variant|15|P/H|MODERATE|SPOCD1|deleterious(0)|probably_damaging(1);	242	0.136723
chr1	197109416	G	C	missense_variant|FGR|p.Gly351Ala;missense_variant|FGR|p.Gly351Ala;missense_variant|FGR|p.Gly318Ala;missense_variant|FGR|p.Gly351Ala;missense_variant|FGR|p.Gly332Ala	0.02	chr1:27614893|missense_variant|351|G/A|MODERATE|FGR|deleterious(0.02)|possibly_damaging(0.863);chr1:27614893|missense_variant|351|G/A|MODERATE|FGR|deleterious(0.02)|possibly_damaging(0.863);chr1:27614893|missense_variant|351|G/A|MODERATE|FGR|deleterious(0.02)|possibly_damaging(0.863);	362	0.20452
chr1	197379793	C	G	missense_variant&splice_region_variant|MAP3K6|p.Ile1267Met	0.01	chr1:27355671|missense_variant,splice_region_variant|1254|I/M|MODERATE|MAP3K6|deleterious(0)|possibly_damaging(0.815);chr1:27355671|missense_variant,splice_region_variant|1262|I/M|MODERATE|MAP3K6|deleterious(0)|possibly_damaging(0.718);	45	0.0254237
chr1	197870753	G	A	missense_variant|GPATCH3|p.Arg451His	0	chr1:26892420|missense_variant|451|R/H|MODERATE|GPATCH3|deleterious(0.01)|probably_damaging(1);	95	0.0536723
chr1	197872367	C	T	missense_variant|GPATCH3|p.Leu494Phe	0	chr1:26891108|missense_variant|494|L/F|MODERATE|GPATCH3|deleterious(0.02)|probably_damaging(0.995);	35	0.019774
chr1	198443923	G	A	missense_variant|CRYBG2|p.Arg583His;missense_variant|CRYBG2|p.Arg553His;missense_variant|CRYBG2|p.Arg309His	0.03	chr1:26346131|missense_variant|176|R/H|MODERATE|CRYBG2|deleterious_low_confidence(0)|probably_damaging(0.999);chr1:26346131|missense_variant|176|R/H|MODERATE|CRYBG2|deleterious_low_confidence(0)|probably_damaging(0.999);	35	0.019774
chr1	198445558	C	A	missense_variant|CRYBG2|p.Pro1128Gln;missense_variant|CRYBG2|p.Pro1098Gln;missense_variant|CRYBG2|p.Pro854Gln	0.03	chr1:26344484|missense_variant|725|P/Q|MODERATE|CRYBG2|deleterious_low_confidence(0)|possibly_damaging(0.626);chr1:26344484|missense_variant|725|P/Q|MODERATE|CRYBG2|deleterious_low_confidence(0)|possibly_damaging(0.626);	3	0.00169492
chr1	198454186	C	T	missense_variant|CRYBG2|p.Ser1774Phe;missense_variant|CRYBG2|p.Ser1744Phe;missense_variant|CRYBG2|p.Ser1500Phe	0	chr1:26336164|missense_variant|1372|S/F|MODERATE|CRYBG2|deleterious(0)|probably_damaging(0.966);chr1:26336164|missense_variant|1372|S/F|MODERATE|CRYBG2|deleterious(0)|probably_damaging(0.966);	33	0.0186441
chr1	198629439	G	C	missense_variant|FAM110D|p.Pro9Arg	0.02	chr1:26161317|missense_variant|9|P/R|MODERATE|FAM110D|deleterious_low_confidence(0.01)|possibly_damaging(0.809);	41	0.0231638
chr1	198966028	G	C	missense_variant|AUNIP|p.Asp187His	0	chr1:25835490|missense_variant|193|D/H|MODERATE|AUNIP|deleterious(0.01)|probably_damaging(0.997);chr1:25835490|missense_variant|193|D/H|MODERATE|AUNIP|deleterious(0.01)|probably_damaging(0.997);	44	0.0248588
chr1	200374856	G	C	missense_variant|GRHL3|p.Leu619Val	0	chr1:24364345|missense_variant|619|L/V|MODERATE|GRHL3|-|possibly_damaging(0.528);	49	0.0276836
chr1	200613955	G	A	missense_variant|IL22RA1|p.Val570Ile	0	chr1:24120822|missense_variant|570|V/M|MODERATE|IL22RA1|deleterious(0)|probably_damaging(1);	12	0.00677966
chr1	200666512	G	C	missense_variant|MYOM3|p.Val1022Leu;missense_variant|MYOM3|p.Val1022Leu	0	chr1:24071203|missense_variant|1022|V/L|MODERATE|MYOM3|deleterious(0)|probably_damaging(0.999);	117	0.0661017
chr1	200967452	G	A	missense_variant&splice_region_variant|GALE|p.Arg40His;missense_variant&splice_region_variant|GALE|p.Arg40His;missense_variant&splice_region_variant|GALE|p.Arg40His;missense_variant&splice_region_variant|GALE|p.Arg40His;missense_variant&splice_region_variant|GALE|p.Arg40His;missense_variant&splice_region_variant|GALE|p.Arg40His;missense_variant&splice_region_variant|GALE|p.Arg40His	0.01	chr1:23798889|missense_variant,splice_region_variant|40|R/H|MODERATE|GALE|deleterious(0)|probably_damaging(0.979);chr1:23798889|missense_variant,splice_region_variant|40|R/H|MODERATE|GALE|deleterious(0)|probably_damaging(0.979);chr1:23798889|missense_variant,splice_region_variant|40|R/H|MODERATE|GALE|deleterious(0)|probably_damaging(0.979);	250	0.141243
chr1	202278235	T	C	missense_variant|ZBTB40|p.Glu346Gly;missense_variant|ZBTB40|p.Glu346Gly	0	chr1:22502311|missense_variant|346|E/G|MODERATE|ZBTB40|deleterious(0.05)|possibly_damaging(0.682);chr1:22502311|missense_variant|346|E/G|MODERATE|ZBTB40|deleterious(0.05)|possibly_damaging(0.682);chr1:22502311|missense_variant|346|E/G|MODERATE|ZBTB40|deleterious(0.05)|possibly_damaging(0.682);	7	0.0039548
chr1	202882756	A	G	missense_variant|HSPG2|p.His665Arg;missense_variant|HSPG2|p.His668Arg;missense_variant|HSPG2|p.His665Arg;missense_variant|HSPG2|p.His640Arg;missense_variant|HSPG2|p.His640Arg;missense_variant|HSPG2|p.His665Arg;missense_variant|HSPG2|p.His665Arg;missense_variant|HSPG2|p.His648Arg;missense_variant|HSPG2|p.His640Arg	0	chr1:21880555|missense_variant|669|H/R|MODERATE|HSPG2|deleterious(0.01)|probably_damaging(0.997);chr1:21880555|missense_variant|668|H/R|MODERATE|HSPG2|deleterious(0.01)|probably_damaging(0.997);	71	0.040113
chr1	202903246	G	A	missense_variant|HSPG2|p.Val1660Met;missense_variant|HSPG2|p.Val1663Met;missense_variant|HSPG2|p.Val1660Met;missense_variant|HSPG2|p.Val1635Met;missense_variant|HSPG2|p.Val1635Met;missense_variant|HSPG2|p.Val1660Met;missense_variant|HSPG2|p.Val1660Met;missense_variant|HSPG2|p.Val1643Met;missense_variant|HSPG2|p.Val1635Met	0	chr1:21860204|missense_variant|1664|V/M|MODERATE|HSPG2|deleterious(0.05)|possibly_damaging(0.839);chr1:21860204|missense_variant|1663|V/M|MODERATE|HSPG2|deleterious(0.05)|probably_damaging(0.998);	70	0.039548
chr1	202940177	T	C	missense_variant|HSPG2|p.Leu4394Pro;missense_variant|HSPG2|p.Ser4349Pro;missense_variant|HSPG2|p.Ser4352Pro;missense_variant|HSPG2|p.Leu4369Pro;missense_variant|HSPG2|p.Leu4068Pro;missense_variant|HSPG2|p.Leu4295Pro;missense_variant|HSPG2|p.Leu4388Pro;missense_variant|HSPG2|p.Leu4377Pro;missense_variant|HSPG2|p.Leu4322Pro	0	chr1:21823447|missense_variant|4350|S/P|MODERATE|HSPG2|deleterious(0)|possibly_damaging(0.887);chr1:21823447|missense_variant|4349|S/P|MODERATE|HSPG2|deleterious(0)|possibly_damaging(0.597);	38	0.0214689
chr1	202947026	G	A	missense_variant|LDLRAD2|p.Leu188Phe	0	chr1:21815996|missense_variant|189|L/F|MODERATE|LDLRAD2|deleterious(0.04)|probably_damaging(1);	177	0.1
chr1	204070569	G	A	missense_variant|PINK1|p.His310Tyr	0.04	chr1:20644641|missense_variant|310|H/Y|MODERATE|PINK1|deleterious(0.03)|probably_damaging(0.976);	117	0.0661017
chr1	204648046	C	T	missense_variant|PLA2G5|p.Val32Met;missense_variant|PLA2G5|p.Val18Met	0	chr1:20086094|missense_variant|18|V/M|MODERATE|PLA2G5|deleterious(0)|probably_damaging(1);chr1:20086094|missense_variant|18|V/M|MODERATE|PLA2G5|deleterious(0)|probably_damaging(1);chr1:20086094|missense_variant|18|V/M|MODERATE|PLA2G5|deleterious(0)|probably_damaging(1);chr1:20086094|missense_variant|18|V/M|MODERATE|PLA2G5|deleterious(0)|probably_damaging(1);chr1:20086094|missense_variant|18|V/M|M…	44	0.0248588
chr1	204983435	C	T	missense_variant|TMCO4|p.Thr272Met	0.04	chr1:19745594|missense_variant|272|T/M|MODERATE|TMCO4|deleterious(0)|probably_damaging(0.99);chr1:19745594|missense_variant|272|T/M|MODERATE|TMCO4|deleterious(0)|probably_damaging(0.99);chr1:19745594|missense_variant|272|T/M|MODERATE|TMCO4|deleterious(0)|probably_damaging(0.99);chr1:19745594|missense_variant|272|T/M|MODERATE|TMCO4|deleterious(0)|probably_damaging(0.993);chr1:19745594|missense_var…	46	0.0259887
chr1	205401624	G	A	missense_variant|SLC66A1|p.Thr113Met;missense_variant|SLC66A1|p.Thr63Met;missense_variant|SLC66A1|p.Thr63Met;missense_variant|SLC66A1|p.Thr63Met;missense_variant|SLC66A1|p.Thr102Met	0.01	chr1:19324656|missense_variant|63|T/M|MODERATE|SLC66A1|deleterious(0.02)|possibly_damaging(0.827);chr1:19324656|missense_variant|63|T/M|MODERATE|SLC66A1|deleterious(0.02)|possibly_damaging(0.827);chr1:19324656|missense_variant|63|T/M|MODERATE|SLC66A1|deleterious(0.02)|possibly_damaging(0.827);	219	0.123729
chr1	205821856	G	A	missense_variant|IFFO2|p.Glu440Lys;missense_variant|IFFO2|p.Glu419Lys;missense_variant|IFFO2|p.Glu372Lys;missense_variant|IFFO2|p.Glu440Lys	0.04	chr1:18911446|missense_variant|419|E/K|MODERATE|IFFO2|deleterious(0)|probably_damaging(0.997);	22	0.0124294
chr1	206250935	C	G	missense_variant|KLHDC7A|p.Glu481Gln	0.03	chr1:18482422|missense_variant|481|E/Q|MODERATE|KLHDC7A|deleterious(0.01)|probably_damaging(0.991);	177	0.1
chr1	206252254	C	T	missense_variant|KLHDC7A|p.Arg41Lys	0	chr1:18481103|missense_variant|41|R/K|MODERATE|KLHDC7A|deleterious(0.01)|probably_damaging(0.999);	72	0.040678
chr1	207800477	C	A	missense_variant|CROCC|p.Gln1522His;missense_variant|CROCC|p.Gln1519His	0	chr1:16965883|missense_variant|1522|Q/H|MODERATE|CROCC|deleterious(0.03)|probably_damaging(0.993);	108	0.0610169
chr1	208546206	G	A	missense_variant|CPLANE2|p.Arg160His	0.03	chr1:16232558|missense_variant|160|R/H|MODERATE|CPLANE2|deleterious(0.01)|probably_damaging(1);	58	0.0327684
chr1	208849551	A	C	missense_variant|SPEN|p.Ile722Met;missense_variant|SPEN|p.Ile722Met;missense_variant|SPEN|p.Ile655Met;missense_variant|SPEN|p.Ile563Met	0.01	chr1:15928406|missense_variant|722|I/M|MODERATE|SPEN|deleterious(0.04)|possibly_damaging(0.664);	59	0.0333333
chr1	209026076	G	A	missense_variant|FBLIM1|p.Arg39Cys;missense_variant|FBLIM1|p.Arg39Cys;missense_variant|FBLIM1|p.Arg39Cys	0.03	chr1:15765098|missense_variant|39|R/C|MODERATE|FBLIM1|deleterious(0.05)|probably_damaging(0.998);chr1:15765098|missense_variant|39|R/C|MODERATE|FBLIM1|deleterious(0.05)|probably_damaging(0.998);chr1:15765098|missense_variant|39|R/C|MODERATE|FBLIM1|deleterious(0.05)|probably_damaging(0.998);chr1:15765098|missense_variant|39|R/C|MODERATE|FBLIM1|deleterious(0.05)|probably_damaging(0.998);chr1:157650…	44	0.0248588
chr1	209134188	C	G	missense_variant|RSC1A1|p.Asp940His;missense_variant|RSC1A1|p.Asp535His;missense_variant|RSC1A1|p.Asp879His	0.03	chr1:15661468|missense_variant|534|D/H|MODERATE|RSC1A1|deleterious(0.02)|probably_damaging(0.995);	59	0.0333333
chr1	209134550	T	A	missense_variant|RSC1A1|p.Gln819Leu;missense_variant|RSC1A1|p.Gln414Leu;missense_variant|RSC1A1|p.Gln758Leu	0	chr1:15661106|missense_variant|413|Q/L|MODERATE|RSC1A1|deleterious(0.01)|possibly_damaging(0.944);	59	0.0333333
chr1	209134923	C	T	missense_variant|RSC1A1|p.Glu695Lys;missense_variant|RSC1A1|p.Glu290Lys;missense_variant|RSC1A1|p.Glu634Lys	0	chr1:15660736|missense_variant|290|E/K|MODERATE|RSC1A1|deleterious(0)|probably_damaging(1);	59	0.0333333
chr1	209250843	G	A	missense_variant|DNAJC16|p.Ala207Val	0	chr1:15544444|missense_variant|207|A/V|MODERATE|DNAJC16|deleterious(0)|probably_damaging(1);	75	0.0423729
chr1	209610001	C	T	missense_variant|FHAD1|p.Ala262Thr	0.03	chr1:15301310|missense_variant|262|A/T|MODERATE|FHAD1|deleterious(0.05)|probably_damaging(1);	1389	0.784746
chr1	211678876	G	T	missense_variant|CFAP107|p.His128Gln;missense_variant|CFAP107|p.His81Gln	0.04	chr1:12759327|missense_variant|43|H/Q|MODERATE|CFAP107|deleterious(0.04)|probably_damaging(0.993);chr1:12759327|missense_variant|81|H/Q|MODERATE|CFAP107|deleterious(0.03)|probably_damaging(0.987);	150	0.0847458
chr1	211716997	C	T	missense_variant|AADACL3|p.Val367Met	0.02	chr1:12725871|missense_variant|367|V/M|MODERATE|AADACL3|deleterious(0.01)|possibly_damaging(0.862);	788	0.445198
chr1	211776587	C	T	missense_variant|AADACL4|p.Arg350His	0.02	chr1:12666560|missense_variant|350|R/H|MODERATE|AADACL4|deleterious(0.02)|probably_damaging(0.978);	73	0.0412429
chr1	212258238	G	A	missense_variant|TNFRSF1B|p.His247Tyr;missense_variant|TNFRSF1B|p.His182Tyr;missense_variant|TNFRSF1B|p.His177Tyr	0	chr1:12192517|missense_variant|182|H/Y|MODERATE|TNFRSF1B|deleterious(0)|probably_damaging(1);	12	0.00677966
chr1	212530125	G	T	missense_variant|KIAA2013|p.Gly163Val	0	chr1:11925750|missense_variant|163|G/V|MODERATE|KIAA2013|deleterious_low_confidence(0.01)|probably_damaging(0.998);	310	0.175141
chr1	212600178	C	T	missense_variant|NPPB|p.Arg45Cys;missense_variant|NPPB|p.Arg45Cys	0.03	chr1:11858463|missense_variant|47|R/C|MODERATE|NPPB|deleterious(0.03)|possibly_damaging(0.875);	76	0.0429379
chr1	212806024	C	T	missense_variant|FBXO44|p.Ala2Thr;missense_variant|FBXO44|p.Ala2Thr;missense_variant|FBXO44|p.Ala2Thr;missense_variant|FBXO44|p.Ala2Thr;missense_variant|FBXO44|p.Ala2Thr;missense_variant|FBXO44|p.Ala2Thr	0	chr1:11655839|missense_variant|2|A/T|MODERATE|FBXO44|deleterious_low_confidence(0.03)|probably_damaging(0.993);chr1:11655839|missense_variant|2|A/T|MODERATE|FBXO44|deleterious_low_confidence(0.01)|probably_damaging(0.994);chr1:11655839|missense_variant|2|A/T|MODERATE|FBXO44|deleterious_low_confidence(0.03)|probably_damaging(0.993);chr1:11655839|missense_variant|2|A/T|MODERATE|FBXO44|deleterious_l…	77	0.0435028
chr1	213380612	A	T	missense_variant|EXOSC10|p.Arg884Ser;missense_variant|EXOSC10|p.Arg875Ser	0	chr1:11066721|missense_variant|885|R/S|MODERATE|EXOSC10|deleterious_low_confidence(0)|probably_damaging(1);chr1:11066721|missense_variant|860|R/S|MODERATE|EXOSC10|deleterious_low_confidence(0)|probably_damaging(1);	113	0.0638418
chr1	214005374	C	T	missense_variant|DFFA|p.Ala288Val	0	chr1:10461623|missense_variant|288|A/V|MODERATE|DFFA|deleterious(0)|possibly_damaging(0.673);	51	0.0288136
chr1	214044254	G	A	missense_variant|PGD|p.Pro384Leu	0.01	chr1:10418867|missense_variant|362|P/L|MODERATE|PGD|deleterious(0)|possibly_damaging(0.777);chr1:10418867|missense_variant|371|P/L|MODERATE|PGD|deleterious(0)|possibly_damaging(0.784);chr1:10418867|missense_variant|384|P/L|MODERATE|PGD|deleterious(0)|possibly_damaging(0.784);	244	0.137853
chr1	214713616	C	T	missense_variant|CLSTN1|p.Ala143Val;missense_variant|CLSTN1|p.Ala143Val;missense_variant|CLSTN1|p.Ala143Val;missense_variant|CLSTN1|p.Ala66Val	0.01	chr1:9773289|missense_variant|66|A/V|MODERATE|CLSTN1|deleterious(0)|possibly_damaging(0.93);chr1:9773289|missense_variant|66|A/V|MODERATE|CLSTN1|deleterious(0)|possibly_damaging(0.93);chr1:9773289|missense_variant|66|A/V|MODERATE|CLSTN1|deleterious(0)|probably_damaging(0.958);	59	0.0333333
chr1	214737007	C	T	missense_variant|CLSTN1|p.Ala357Val;missense_variant|CLSTN1|p.Ala347Val;missense_variant|CLSTN1|p.Ala357Val;missense_variant|CLSTN1|p.Ala280Val	0.02	chr1:9749607|missense_variant|280|A/V|MODERATE|CLSTN1|deleterious(0)|possibly_damaging(0.635);chr1:9749607|missense_variant|280|A/V|MODERATE|CLSTN1|deleterious(0.01)|possibly_damaging(0.635);chr1:9749607|missense_variant|270|A/V|MODERATE|CLSTN1|deleterious(0.01)|possibly_damaging(0.75);	271	0.153107
chr1	217884382	G	A	missense_variant|THAP3|p.Ala231Val	0	chr1:6633049|missense_variant|230|A/V|MODERATE|THAP3|deleterious(0)|possibly_damaging(0.728);chr1:6633049|missense_variant|231|A/V|MODERATE|THAP3|deleterious(0)|possibly_damaging(0.608);chr1:6633049|missense_variant|238|A/V|MODERATE|THAP3|deleterious(0)|probably_damaging(0.996);	152	0.0858757
chr1	218049591	T	C	missense_variant|PLEKHG5|p.Ser896Pro;missense_variant|PLEKHG5|p.Ser794Pro;missense_variant|PLEKHG5|p.Ser811Pro	0.04	chr1:6469052|missense_variant|784|S/P|MODERATE|PLEKHG5|deleterious(0)|probably_damaging(0.999);chr1:6469052|missense_variant|747|S/P|MODERATE|PLEKHG5|deleterious(0)|probably_damaging(0.999);chr1:6469052|missense_variant|747|S/P|MODERATE|PLEKHG5|deleterious(0)|probably_damaging(0.999);chr1:6469052|missense_variant|784|S/P|MODERATE|PLEKHG5|deleterious(0)|probably_damaging(0.999);chr1:6469052|missen…	10	0.00564972
chr1	218273037	G	A	missense_variant|GPR153|p.Gly173Ser	0	chr1:6253987|missense_variant|173|G/S|MODERATE|GPR153|deleterious(0.03)|probably_damaging(1);chr1:6253987|missense_variant|173|G/S|MODERATE|GPR153|deleterious(0.03)|probably_damaging(1);chr1:6253987|missense_variant|173|G/S|MODERATE|GPR153|deleterious(0.03)|probably_damaging(1);	98	0.0553672
chr1	218676146	A	G	missense_variant|NPHP4|p.Ile1388Val;missense_variant|NPHP4|p.Ile1247Val	0	chr1:5863381|missense_variant|876|I/V|MODERATE|NPHP4|deleterious(0)|possibly_damaging(0.929);chr1:5863381|missense_variant|877|I/V|MODERATE|NPHP4|deleterious(0)|probably_damaging(0.985);chr1:5863381|missense_variant|1389|I/V|MODERATE|NPHP4|deleterious(0)|probably_damaging(0.998);chr1:5863381|missense_variant|1389|I/V|MODERATE|NPHP4|deleterious(0)|probably_damaging(0.998);chr1:5863381|missense_var…	413	0.233333
chr1	218676180	G	A	missense_variant|NPHP4|p.Gly1399Glu;missense_variant|NPHP4|p.Gly1258Glu	0	chr1:5863347|missense_variant|887|G/D|MODERATE|NPHP4|deleterious(0)|probably_damaging(0.97);chr1:5863347|missense_variant|888|G/D|MODERATE|NPHP4|deleterious(0)|probably_damaging(0.97);chr1:5863347|missense_variant|1400|G/D|MODERATE|NPHP4|deleterious(0)|probably_damaging(1);chr1:5863347|missense_variant|1400|G/D|MODERATE|NPHP4|deleterious(0)|probably_damaging(1);chr1:5863347|missense_variant|1400|…	46	0.0259887
chr1	220624609	A	G	missense_variant|DFFB|p.Met172Thr	0	chr1:3869672|missense_variant|217|M/T|MODERATE|DFFB|deleterious(0)|probably_damaging(0.99);chr1:3869672|missense_variant|144|M/T|MODERATE|DFFB|deleterious(0.01)|probably_damaging(1);chr1:3869672|missense_variant|129|M/T|MODERATE|DFFB|deleterious(0)|probably_damaging(0.99);chr1:3869672|missense_variant|193|M/T|MODERATE|DFFB|deleterious(0)|probably_damaging(0.99);	8	0.00451977
chr1	220776974	G	A	missense_variant|TP73|p.Arg623Cys;missense_variant|TP73|p.Arg135Cys;missense_variant|TP73|p.Arg599Cys;missense_variant|TP73|p.Arg282Cys;missense_variant|TP73|p.Arg623Cys	0	chr1:3732963|missense_variant|550|R/C|MODERATE|TP73|deleterious_low_confidence(0)|probably_damaging(1);chr1:3732963|missense_variant|518|R/C|MODERATE|TP73|deleterious_low_confidence(0)|probably_damaging(0.999);chr1:3732963|missense_variant|503|R/C|MODERATE|TP73|deleterious_low_confidence(0)|probably_damaging(0.999);chr1:3732963|missense_variant|469|R/C|MODERATE|TP73|deleterious_low_confidence(0)|…	3	0.00169492
chr1	220778878	G	T	missense_variant|TP73|p.Pro509His;missense_variant|TP73|p.Pro485His;missense_variant|TP73|p.Pro509His;synonymous_variant|TP73|p.Thr199Thr	0	chr1:3731035|missense_variant|436|P/H|MODERATE|TP73|deleterious(0.01)|probably_damaging(1);chr1:3731035|missense_variant|436|P/H|MODERATE|TP73|deleterious_low_confidence(0)|probably_damaging(1);chr1:3731035|missense_variant|485|P/H|MODERATE|TP73|deleterious_low_confidence(0)|probably_damaging(1);chr1:3731035|missense_variant|414|P/H|MODERATE|TP73|deleterious(0)|probably_damaging(1);chr1:3731035|m…	20	0.0112994
chr1	220800966	G	A	missense_variant|TP73|p.Pro146Leu;missense_variant|TP73|p.Pro122Leu;missense_variant|TP73|p.Pro146Leu	0.01	chr1:3707727|missense_variant|73|P/L|MODERATE|TP73|deleterious(0)|probably_damaging(1);chr1:3707727|missense_variant|73|P/L|MODERATE|TP73|deleterious(0)|probably_damaging(1);chr1:3707727|missense_variant|73|P/L|MODERATE|TP73|deleterious(0)|probably_damaging(1);chr1:3707727|missense_variant|122|P/L|MODERATE|TP73|deleterious(0.01)|probably_damaging(1);chr1:3707727|missense_variant|122|P/L|MODERATE|…	4	0.00225989
chr1	221057116	A	C	missense_variant|ARHGEF16|p.Leu10Trp	0	chr1:3463113|missense_variant|10|L/W|MODERATE|ARHGEF16|deleterious(0.01)|probably_damaging(0.986);chr1:3463113|missense_variant|10|L/W|MODERATE|ARHGEF16|deleterious(0.01)|probably_damaging(0.986);	44	0.0248588
chr1	221095340	C	T	missense_variant|PRDM16|p.Asp985Asn	0.03	chr1:3425594|missense_variant|985|D/N|MODERATE|PRDM16|deleterious(0.03)|probably_damaging(0.996);chr1:3425594|missense_variant|985|D/N|MODERATE|PRDM16|deleterious(0.03)|probably_damaging(0.968);	11	0.00621469
chr1	221732227	T	A	missense_variant|TTC34|p.Leu63Gln	0	chr1:2787608|missense_variant|576|L/Q|MODERATE|TTC34|deleterious(0)|probably_damaging(0.998);	2	0.00112994
chr1	221904122	C	T	missense_variant|PLCH2|p.Arg1414His	0	chr1:2505206|missense_variant|1415|R/H|MODERATE|PLCH2|deleterious_low_confidence(0)|possibly_damaging(0.913);	46	0.0259887
chr1	221904504	G	A	missense_variant|PLCH2|p.Arg1287Trp	0.02	chr1:2504824|missense_variant|1288|R/W|MODERATE|PLCH2|deleterious_low_confidence(0)|probably_damaging(0.975);	21	0.0118644
chr2	558620	T	G	missense_variant|MUC20|p.Leu150Val;missense_variant|MUC20|p.Leu150Val	0	chr3:195725087|missense_variant|162|L/V|MODERATE|MUC20|deleterious(0.02)|possibly_damaging(0.728);	199	0.112429
chr2	822032	T	A	missense_variant|TFRC|p.Asp43Val	0	chr3:196075269|missense_variant|43|D/V|MODERATE|TFRC|deleterious(0)|probably_damaging(1);chr3:196075269|missense_variant|43|D/V|MODERATE|TFRC|deleterious(0)|probably_damaging(1);	28	0.0158192
chr2	2414566	G	A	missense_variant|APOD|p.Ala129Thr	0	chr3:195569085|missense_variant|129|A/T|MODERATE|APOD|deleterious(0.05)|possibly_damaging(0.937);	17	0.00960452
chr2	3330893	C	T	missense_variant|TMEM44|p.Pro229Leu	0	chr3:194617700|missense_variant|230|P/L|MODERATE|TMEM44|deleterious_low_confidence(0)|possibly_damaging(0.549);	227	0.128249
chr2	3343841	G	T	missense_variant|TMEM44|p.Ser389Ile	0	chr3:194604435|missense_variant|343|S/I|MODERATE|TMEM44|deleterious(0.03)|probably_damaging(0.997);chr3:194604435|missense_variant|390|S/I|MODERATE|TMEM44|deleterious(0.01)|possibly_damaging(0.946);chr3:194604435|missense_variant|343|S/I|MODERATE|TMEM44|deleterious(0.02)|probably_damaging(0.999);	72	0.040678
chr2	3556311	C	T	missense_variant|GP5|p.Arg240Trp	0.03	chr3:194397565|missense_variant|240|R/W|MODERATE|GP5|deleterious(0.03)|probably_damaging(0.999);	70	0.039548
chr2	3556774	T	C	missense_variant|GP5|p.Leu394Pro	0.01	chr3:194397102|missense_variant|394|L/P|MODERATE|GP5|deleterious(0)|probably_damaging(1);	13	0.00734463
chr2	4678955	G	A	missense_variant|ATP13A5|p.Arg1069Gln	0	chr3:193284934|missense_variant|1069|R/Q|MODERATE|ATP13A5|deleterious(0)|probably_damaging(1);	14	0.0079096
chr2	6422502	G	A	missense_variant|PYDC2|p.Leu14Phe	0	chr3:191461202|missense_variant|14|L/F|MODERATE|PYDC2|deleterious(0.01)|probably_damaging(1);	145	0.0819209
chr2	6987780	C	T	missense_variant|GMNC|p.Leu170Phe	0	chr3:190855792|missense_variant|170|L/F|MODERATE|GMNC|deleterious(0)|probably_damaging(1);	37	0.020904
chr2	13924132	A	G	missense_variant|PDCD6IP|p.Leu49Pro;missense_variant|PDCD6IP|p.Leu49Pro	0	chr3:33798874|missense_variant|49|L/P|MODERATE|PDCD6IP|deleterious(0)|probably_damaging(1);chr3:33798874|missense_variant|49|L/P|MODERATE|PDCD6IP|deleterious(0)|probably_damaging(1);chr3:33798874|missense_variant|49|L/P|MODERATE|PDCD6IP|deleterious(0)|probably_damaging(1);	2	0.00112994
chr2	27811400	G	C	missense_variant|EFHB|p.Glu153Gln	0	chr3:19933499|missense_variant|174|E/Q|MODERATE|EFHB|deleterious_low_confidence(0.01)|probably_damaging(0.982);	259	0.146328
chr2	27865440	C	T	missense_variant|EFHB|p.Ser681Phe;missense_variant|EFHB|p.Ser610Phe	0	chr3:19884444|missense_variant|572|S/F|MODERATE|EFHB|deleterious(0)|probably_damaging(1);chr3:19884444|missense_variant|702|S/F|MODERATE|EFHB|deleterious(0)|probably_damaging(0.999);	21	0.0118644
chr2	32022524	T	G	missense_variant|BTD|p.Tyr484Ser	0.02	chr3:15645217|missense_variant|434|Y/S|MODERATE|BTD|deleterious(0.02)|probably_damaging(0.999);chr3:15645217|missense_variant|434|Y/S|MODERATE|BTD|deleterious(0.02)|probably_damaging(0.999);chr3:15645217|missense_variant|434|Y/S|MODERATE|BTD|deleterious(0.02)|probably_damaging(0.999);chr3:15645217|missense_variant|434|Y/S|MODERATE|BTD|deleterious(0.02)|probably_damaging(0.999);chr3:15645217|misse…	63	0.0355932
chr2	32081548	C	T	missense_variant|HACL1|p.Arg140Cys;missense_variant|HACL1|p.Arg140Cys;missense_variant|HACL1|p.Arg140Cys;missense_variant|HACL1|p.Arg140Cys;missense_variant|HACL1|p.Arg140Cys;missense_variant|HACL1|p.Arg140Cys;missense_variant|HACL1|p.Arg102Cys;missense_variant|HACL1|p.Arg140Cys	0.01	chr3:15586566|missense_variant|113|R/C|MODERATE|HACL1|deleterious(0)|probably_damaging(1);chr3:15586566|missense_variant|140|R/C|MODERATE|HACL1|deleterious(0)|probably_damaging(1);	61	0.0344633
chr2	32701653	C	A	missense_variant|COL6A5|p.Asp160Glu;missense_variant|COL6A5|p.Asp160Glu	0.02	chr3:130376649|missense_variant|160|D/E|MODERATE|COL6A5|deleterious(0.01)|possibly_damaging(0.857);chr3:130376649|missense_variant|160|D/E|MODERATE|COL6A5|deleterious(0.01)|probably_damaging(0.994);	42	0.0237288
chr2	32725622	C	T	missense_variant|COL6A5|p.Ser1279Leu;missense_variant|COL6A5|p.Ser1279Leu	0.02	chr3:130401055|missense_variant|1339|S/F|MODERATE|COL6A5|deleterious(0.01)|probably_damaging(0.995);chr3:130401055|missense_variant|1339|S/F|MODERATE|COL6A5|deleterious(0.01)|possibly_damaging(0.897);	347	0.196045
chr2	34603732	C	T	missense_variant|ACP3|p.Ser61Phe;missense_variant|ACP3|p.Ser61Phe	0.04	chr3:132328328|missense_variant|61|S/F|MODERATE|ACP3|deleterious(0)|probably_damaging(0.996);chr3:132328328|missense_variant|61|S/F|MODERATE|ACP3|deleterious(0)|probably_damaging(0.995);chr3:132328328|missense_variant|61|S/F|MODERATE|ACP3|deleterious(0)|probably_damaging(0.994);	224	0.126554
chr2	35849685	T	A	missense_variant|TOPBP1|p.Gln1167Leu	0	chr3:133618320|missense_variant|1157|Q/L|MODERATE|TOPBP1|deleterious(0.03)|possibly_damaging(0.645);chr3:133618320|missense_variant|1162|Q/L|MODERATE|TOPBP1|deleterious(0.03)|possibly_damaging(0.567);chr3:133618320|missense_variant|1162|Q/L|MODERATE|TOPBP1|deleterious(0.03)|possibly_damaging(0.567);chr3:133618320|missense_variant|1157|Q/L|MODERATE|TOPBP1|deleterious(0.03)|possibly_damaging(0.645);	46	0.0259887
chr2	40218843	G	A	missense_variant|DZIP1L|p.Pro687Leu;missense_variant|DZIP1L|p.Pro614Leu;missense_variant|DZIP1L|p.Pro777Leu	0.02	chr3:138067692|missense_variant|614|P/L|MODERATE|DZIP1L|deleterious(0)|probably_damaging(1);	37	0.020904
chr2	40232150	T	A	missense_variant|DZIP1L|p.Glu501Val;missense_variant|DZIP1L|p.Glu428Val;missense_variant|DZIP1L|p.Glu591Val	0.04	chr3:138080572|missense_variant|428|E/V|MODERATE|DZIP1L|deleterious(0)|probably_damaging(0.999);chr3:138080572|missense_variant|428|E/V|MODERATE|DZIP1L|deleterious(0)|probably_damaging(0.993);	48	0.0271186
chr2	40613998	A	G	missense_variant|ESYT3|p.Thr155Ala	0	chr3:138455305|missense_variant|161|T/A|MODERATE|ESYT3|deleterious(0.01)|possibly_damaging(0.914);chr3:138455305|missense_variant|161|T/A|MODERATE|ESYT3|deleterious(0)|possibly_damaging(0.914);chr3:138455305|missense_variant|161|T/A|MODERATE|ESYT3|deleterious(0.01)|possibly_damaging(0.914);chr3:138455305|missense_variant|161|T/A|MODERATE|ESYT3|deleterious(0.01)|probably_damaging(0.971);chr3:13845…	14	0.0079096
chr2	40621158	C	T	missense_variant|ESYT3|p.Arg294Cys	0	chr3:138462189|missense_variant|300|R/C|MODERATE|ESYT3|deleterious(0)|probably_damaging(0.99);chr3:138462189|missense_variant|300|R/C|MODERATE|ESYT3|deleterious(0)|probably_damaging(0.99);chr3:138462189|missense_variant|300|R/C|MODERATE|ESYT3|deleterious(0)|probably_damaging(0.99);chr3:138462189|missense_variant|300|R/C|MODERATE|ESYT3|deleterious(0)|probably_damaging(0.998);chr3:138462189|missens…	34	0.019209
chr2	40627822	A	T	missense_variant|ESYT3|p.Asn453Tyr	0	chr3:138468822|missense_variant|459|N/Y|MODERATE|ESYT3|deleterious(0)|probably_damaging(0.99);chr3:138468822|missense_variant|459|N/Y|MODERATE|ESYT3|deleterious(0)|probably_damaging(0.99);chr3:138468822|missense_variant|459|N/Y|MODERATE|ESYT3|deleterious(0)|probably_damaging(0.99);chr3:138468822|missense_variant|459|N/Y|MODERATE|ESYT3|deleterious(0)|probably_damaging(0.978);chr3:138468822|missens…	56	0.0316384
chr2	41168957	G	A	missense_variant|PRR23A|p.Pro235Ser	0	chr3:139005566|missense_variant|235|P/S|MODERATE|PRR23A|deleterious(0.01)|probably_damaging(1);	464	0.262147
chr2	41490399	T	G	missense_variant|MRPS22|p.Leu4Arg;missense_variant|MRPS22|p.Leu4Arg	0.02	chr3:139344037|missense_variant|4|L/R|MODERATE|MRPS22|deleterious_low_confidence(0)|possibly_damaging(0.729);chr3:139344037|missense_variant|4|L/R|MODERATE|MRPS22|deleterious_low_confidence(0)|possibly_damaging(0.61);	62	0.0350282
chr2	44935032	T	G	missense_variant|PCOLCE2|p.Lys365Thr	0.03	chr3:142820901|missense_variant|365|K/T|MODERATE|PCOLCE2|deleterious(0)|probably_damaging(0.963);	4	0.00225989
chr2	48368194	C	A	missense_variant|PLSCR4|p.Gly75Val;missense_variant|PLSCR4|p.Gly76Val	0.04	chr3:146206653|missense_variant|76|G/V|MODERATE|PLSCR4|deleterious(0.02)|probably_damaging(0.974);chr3:146206653|missense_variant|76|G/V|MODERATE|PLSCR4|deleterious(0.02)|probably_damaging(0.974);chr3:146206653|missense_variant|76|G/V|MODERATE|PLSCR4|deleterious(0.01)|possibly_damaging(0.878);chr3:146206653|missense_variant|61|G/V|MODERATE|PLSCR4|deleterious(0.01)|possibly_damaging(0.878);chr3:14…	116	0.0655367
chr2	51287332	T	C	missense_variant|HPS3|p.Ile754Thr;missense_variant|HPS3|p.Ile754Thr;missense_variant|HPS3|p.Ile666Thr	0	chr3:149162302|missense_variant|589|I/T|MODERATE|HPS3|deleterious(0)|probably_damaging(0.997);chr3:149162302|missense_variant|754|I/T|MODERATE|HPS3|deleterious(0)|probably_damaging(0.997);	96	0.0542373
chr2	51292945	C	T	missense_variant|HPS3|p.Arg945Trp;missense_variant|HPS3|p.Arg876Trp;missense_variant|HPS3|p.Arg857Trp	0.02	chr3:149167929|stop_gained|780|Q/*|HIGH|HPS3|-|-;chr3:149167929|stop_gained|945|Q/*|HIGH|HPS3|-|-;	51	0.0288136
chr2	51904287	G	A	missense_variant|ANKUB1|p.Leu170Phe	0	chr3:149770618|missense_variant|170|L/F|MODERATE|ANKUB1|deleterious(0.02)|probably_damaging(0.999);chr3:149770618|missense_variant|24|L/F|MODERATE|ANKUB1|deleterious(0.01)|probably_damaging(0.998);chr3:149770618|missense_variant|170|L/F|MODERATE|ANKUB1|deleterious(0.01)|probably_damaging(0.998);	58	0.0327684
[truncated: 2,903 more rows]

## Sheet: Supplementary Table 10
Supplementary Table 10. The neurological function scoring table for the macaques.
Behavioral category		Score
1 Motor system（0-16）
1.1 Hand flexibility when feeding	Normal	0
	Slightly reduced, slowly get food by itself	2
[truncated: 35 more rows]

[truncated: 1 more sheets: Supplementary Table 11]
